# Supplementary material
Source: PubMed Central journal article supplement (PMC3547151)

## Nickel-Catalyzed Reductive Conjugate Addition to Enones Via Allylnickel Intermediates

Ruja Shrestha,† Stephanie C. M. Dorn and Daniel J. Weix\*.

\*Department of Chemistry, University of Rochester, Rochester, NY 14627

†Present Address: Department of Chemistry, University of California, Berkeley, CA 94720

### Supporting Information – NMR Spectra

|       |                                        |     |
|-------|----------------------------------------|-----|
| VIII. | NMR Spectra (separate pdf file)        |     |
|       | Compound <b>1</b> <sup>1</sup> H NMR   | S53 |
|       | Compound <b>1</b> <sup>13</sup> C NMR  | S54 |
|       | Compound <b>1</b> IR spectrum          | S55 |
|       | Compound <b>2</b> <sup>1</sup> H NMR   | S56 |
|       | Compound <b>2</b> <sup>13</sup> C NMR  | S57 |
|       | Compound <b>3</b> <sup>1</sup> H NMR   | S58 |
|       | Compound <b>3</b> <sup>13</sup> C NMR  | S59 |
|       | Compound <b>4</b> <sup>1</sup> H NMR   | S60 |
|       | Compound <b>4</b> <sup>13</sup> C NMR  | S61 |
|       | Compound <b>5</b> <sup>1</sup> H NMR   | S62 |
|       | Compound <b>5</b> <sup>13</sup> C NMR  | S63 |
|       | Compound <b>6</b> <sup>1</sup> H NMR   | S64 |
|       | Compound <b>6</b> <sup>13</sup> C NMR  | S65 |
|       | Compound <b>7</b> <sup>1</sup> H NMR   | S66 |
|       | Compound <b>7</b> <sup>13</sup> C NMR  | S67 |
|       | Compound <b>8</b> <sup>1</sup> H NMR   | S68 |
|       | Compound <b>8</b> <sup>13</sup> C NMR  | S69 |
|       | Compound <b>9</b> <sup>1</sup> H NMR   | S70 |
|       | Compound <b>9</b> <sup>13</sup> C NMR  | S71 |
|       | Compound <b>10</b> <sup>1</sup> H NMR  | S72 |
|       | Compound <b>10</b> <sup>13</sup> C NMR | S73 |
|       | Compound <b>11</b> <sup>1</sup> H NMR  | S74 |
|       | Compound <b>11</b> <sup>13</sup> C NMR | S75 |
|       | Compound <b>12</b> <sup>1</sup> H NMR  | S76 |
|       | Compound <b>12</b> <sup>13</sup> C NMR | S77 |
|       | Compound <b>13</b> <sup>1</sup> H NMR  | S78 |
|       | Compound <b>13</b> <sup>13</sup> C NMR | S79 |
|       | Compound <b>13</b> <sup>19</sup> F NMR | S80 |
|       | Compound <b>14</b> <sup>1</sup> H NMR  | S81 |
|       | Compound <b>14</b> <sup>13</sup> C NMR | S82 |
|       | Compound <b>15</b> <sup>1</sup> H NMR  | S83 |
|       | Compound <b>15</b> <sup>13</sup> C NMR | S84 |
|       | Compound <b>16</b> <sup>1</sup> H NMR  | S85 |
|       | Compound <b>16</b> <sup>13</sup> C NMR | S86 |
|       | Compound <b>17</b> <sup>1</sup> H NMR  | S87 |
|       | Compound <b>17</b> <sup>13</sup> C NMR | S88 |
|       | Compound <b>18</b> <sup>1</sup> H NMR  | S89 |
|       | Compound <b>18</b> <sup>13</sup> C NMR | S90 |
|       | Compound <b>18</b> IR spectrum         | S91 |
|       | Compound <b>19</b> <sup>1</sup> H NMR  | S92 |
|       | Compound <b>19</b> <sup>13</sup> C NMR | S93 |
|       | Compound <b>20</b> <sup>1</sup> H NMR  | S94 |
|       | Compound <b>20</b> <sup>13</sup> C NMR | S95 |
|       | Compound <b>21</b> <sup>1</sup> H NMR  | S96 |

|                    |                     |      |
|--------------------|---------------------|------|
| Compound <b>21</b> | <sup>13</sup> C NMR | S97  |
| Compound <b>22</b> | <sup>1</sup> H NMR  | S98  |
| Compound <b>22</b> | <sup>13</sup> C NMR | S99  |
| Compound <b>23</b> | <sup>1</sup> H NMR  | S100 |
| Compound <b>23</b> | <sup>13</sup> C NMR | S101 |
| Compound <b>23</b> | <sup>19</sup> F NMR | S102 |
| Compound <b>24</b> | <sup>1</sup> H NMR  | S103 |
| Compound <b>24</b> | <sup>13</sup> C NMR | S104 |
| Compound <b>25</b> | <sup>1</sup> H NMR  | S105 |
| Compound <b>25</b> | <sup>13</sup> C NMR | S106 |
| Compound <b>25</b> | <sup>19</sup> F NMR | S107 |
| Compound <b>26</b> | <sup>1</sup> H NMR  | S108 |
| Compound <b>26</b> | <sup>13</sup> C NMR | S109 |
| Compound <b>26</b> | <sup>19</sup> F NMR | S110 |
| Compound <b>27</b> | <sup>1</sup> H NMR  | S111 |
| Compound <b>27</b> | <sup>13</sup> C NMR | S112 |
| Compound <b>27</b> | <sup>19</sup> F NMR | S113 |
| Compound <b>28</b> | <sup>1</sup> H NMR  | S114 |
| Compound <b>28</b> | <sup>13</sup> C NMR | S115 |
| Compound <b>29</b> | <sup>1</sup> H NMR  | S116 |
| Compound <b>29</b> | <sup>13</sup> C NMR | S117 |
| Compound <b>30</b> | <sup>1</sup> H NMR  | S118 |
| Compound <b>30</b> | <sup>13</sup> C NMR | S119 |
| Compound <b>31</b> | <sup>1</sup> H NMR  | S120 |
| Compound <b>31</b> | <sup>13</sup> C NMR | S121 |
| Compound <b>31</b> | <sup>19</sup> F NMR | S122 |
| Compound <b>32</b> | <sup>1</sup> H NMR  | S123 |
| Compound <b>32</b> | <sup>13</sup> C NMR | S124 |
| Compound <b>33</b> | <sup>1</sup> H NMR  | S125 |
| Compound <b>33</b> | <sup>13</sup> C NMR | S126 |
| Compound <b>34</b> | <sup>1</sup> H NMR  | S127 |
| Compound <b>34</b> | <sup>13</sup> C NMR | S128 |

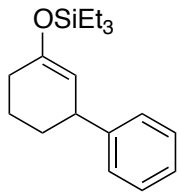**1**

Scheme 1

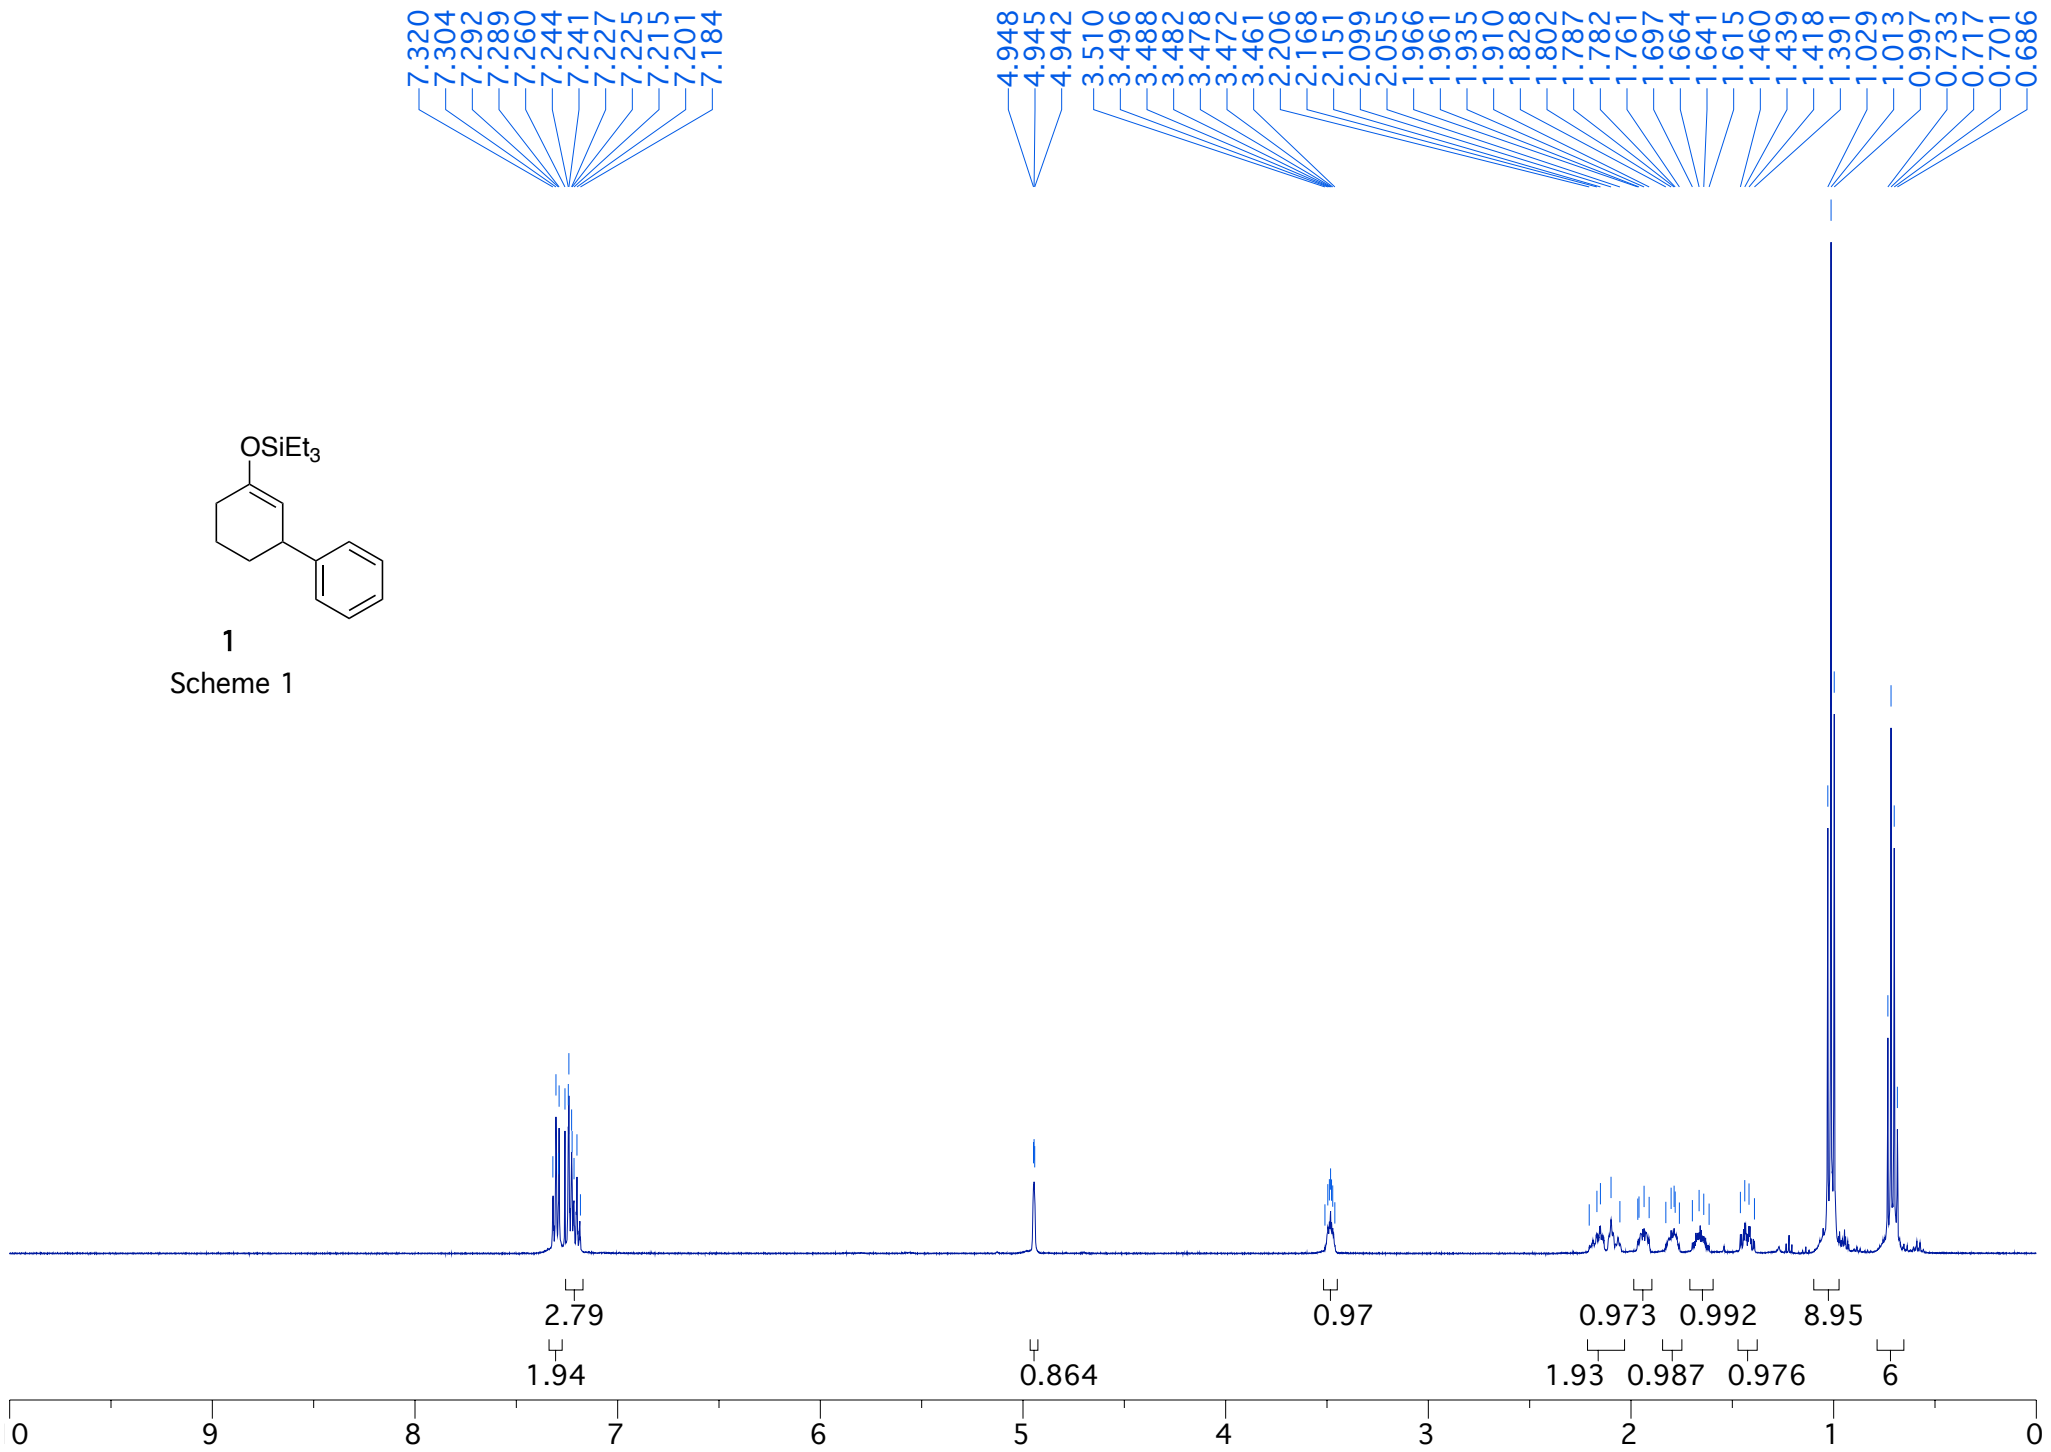

S54

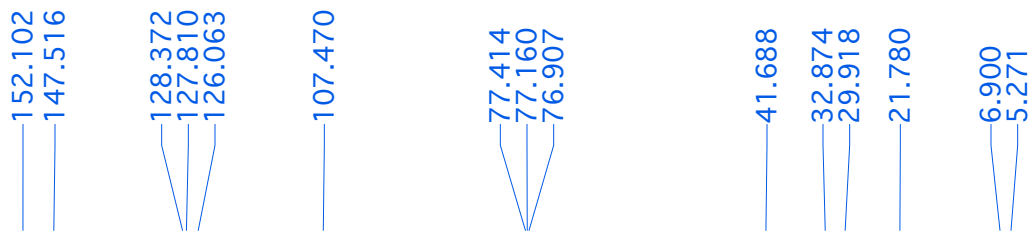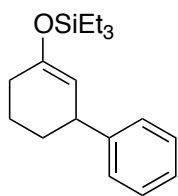

**1**  
Scheme 1

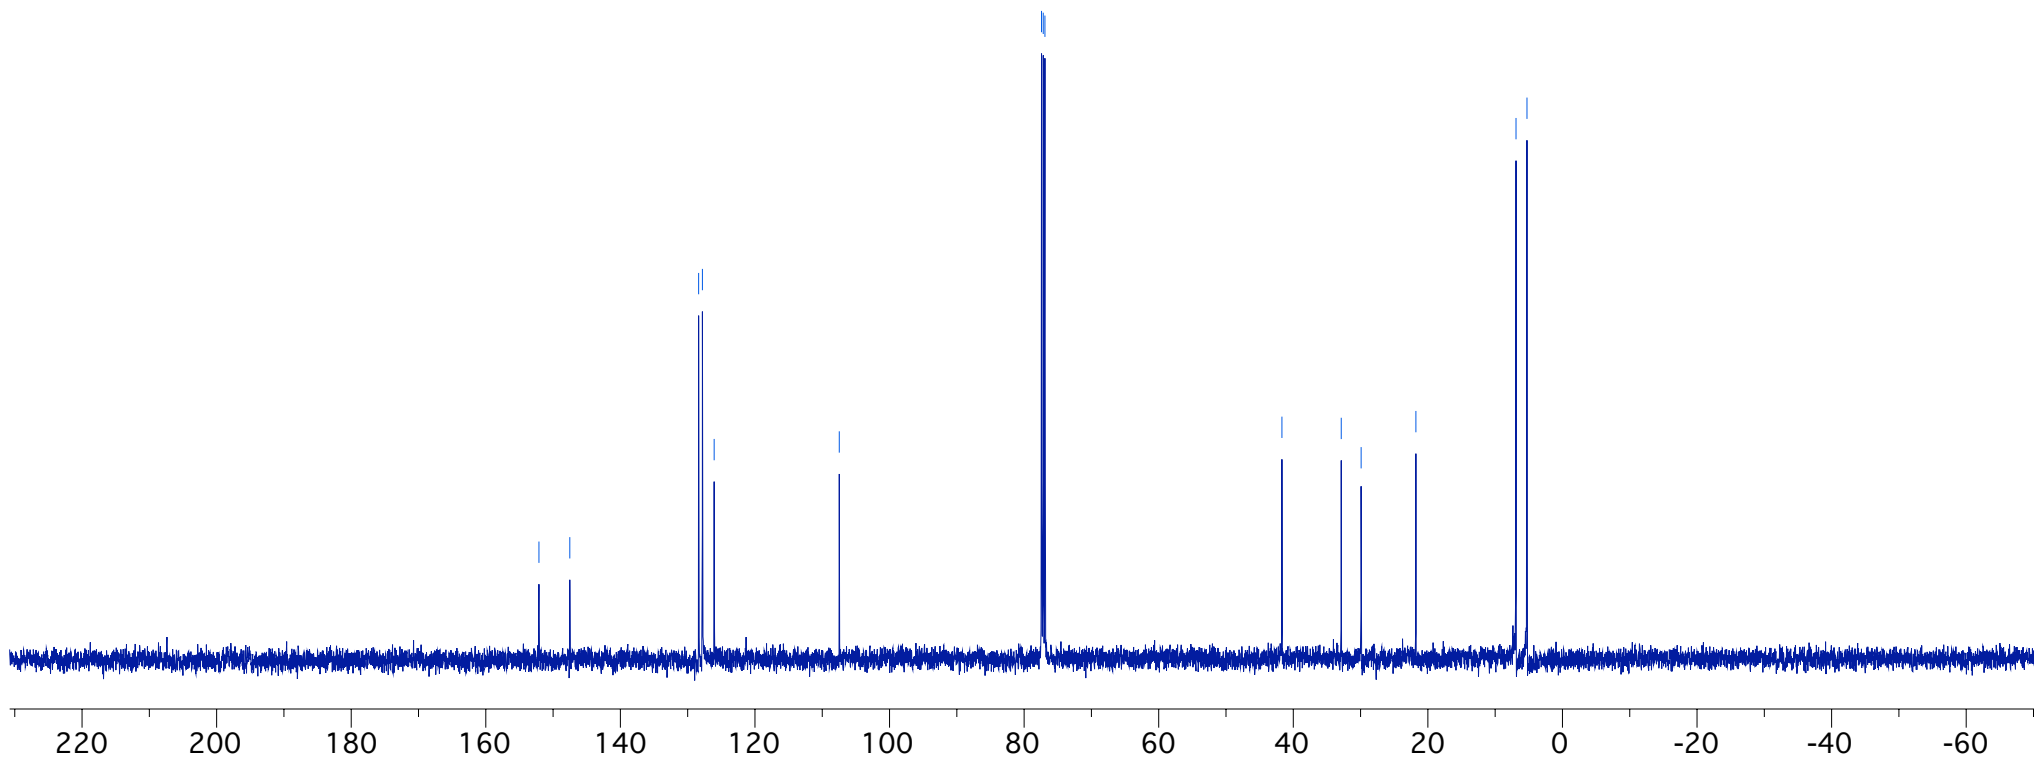

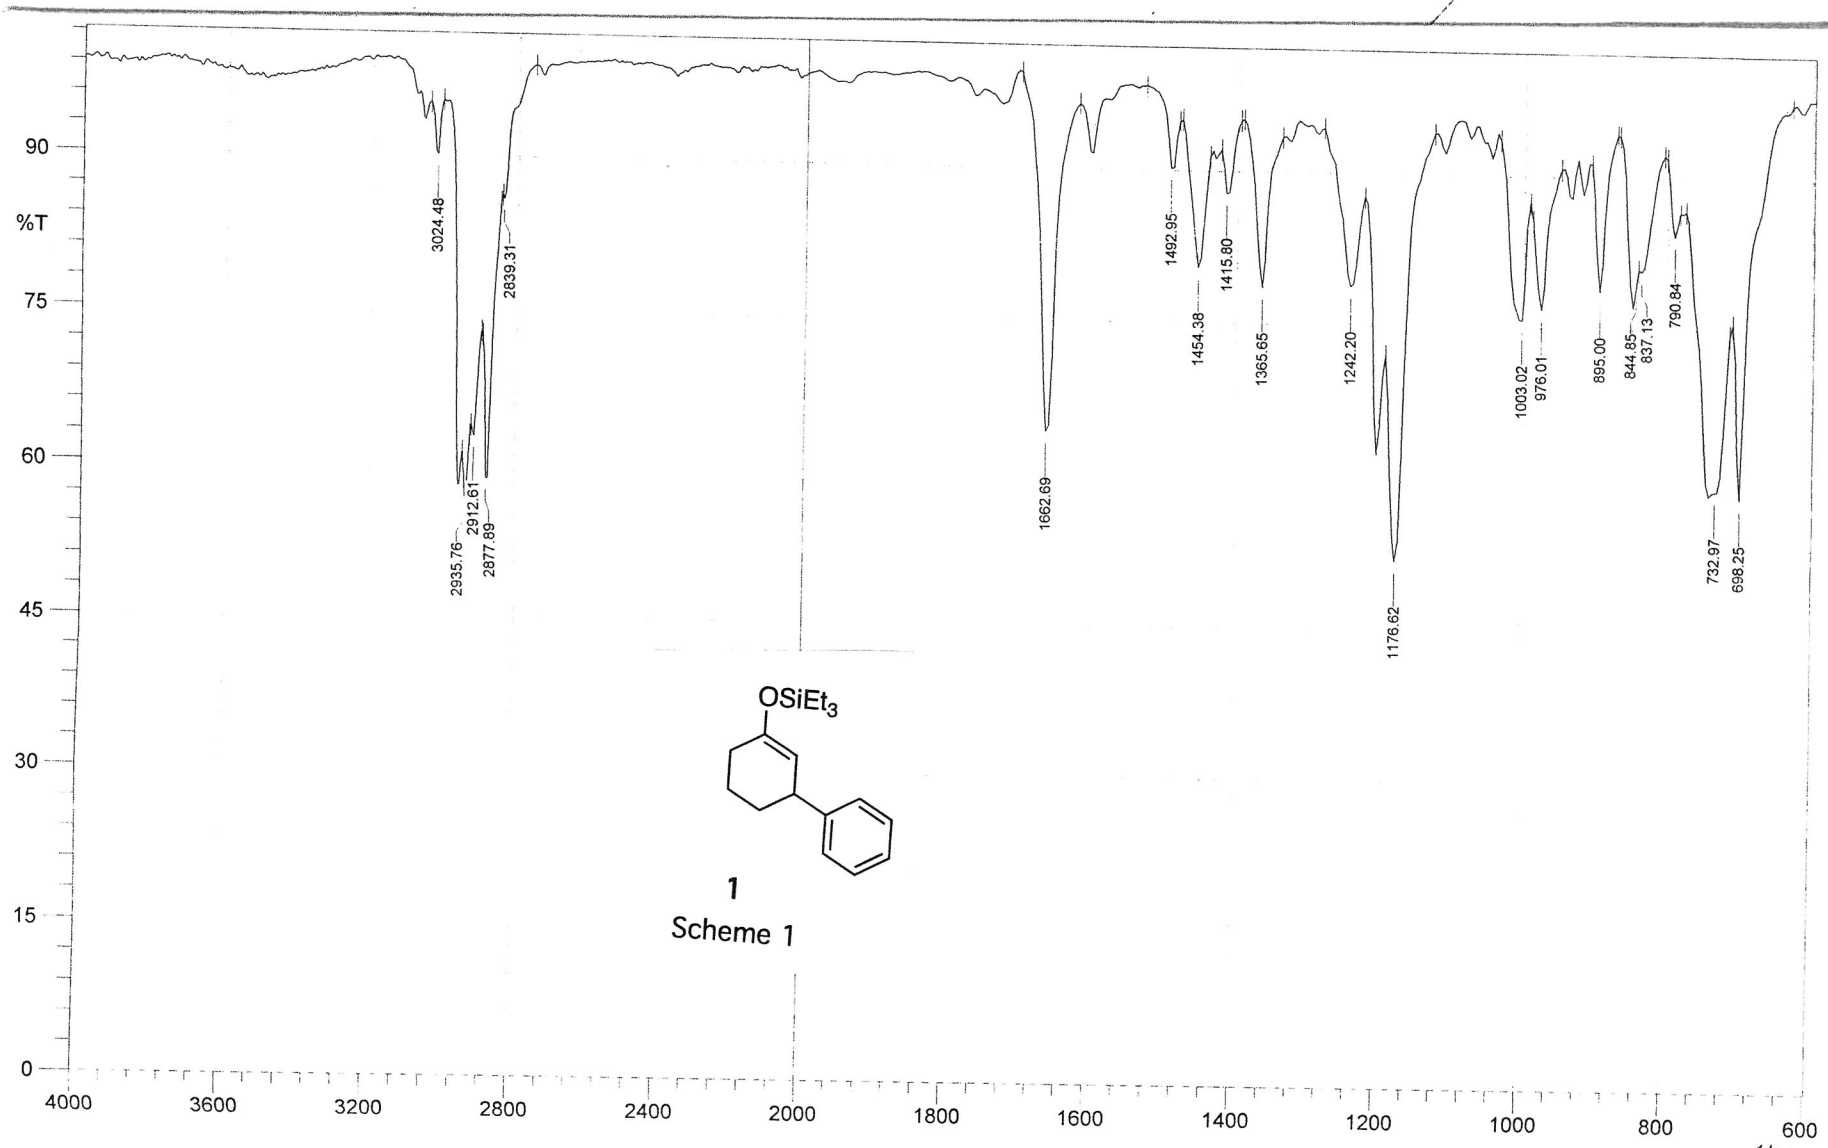

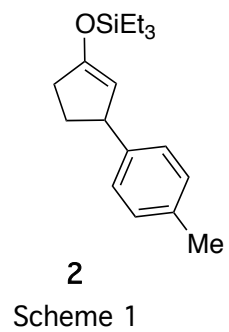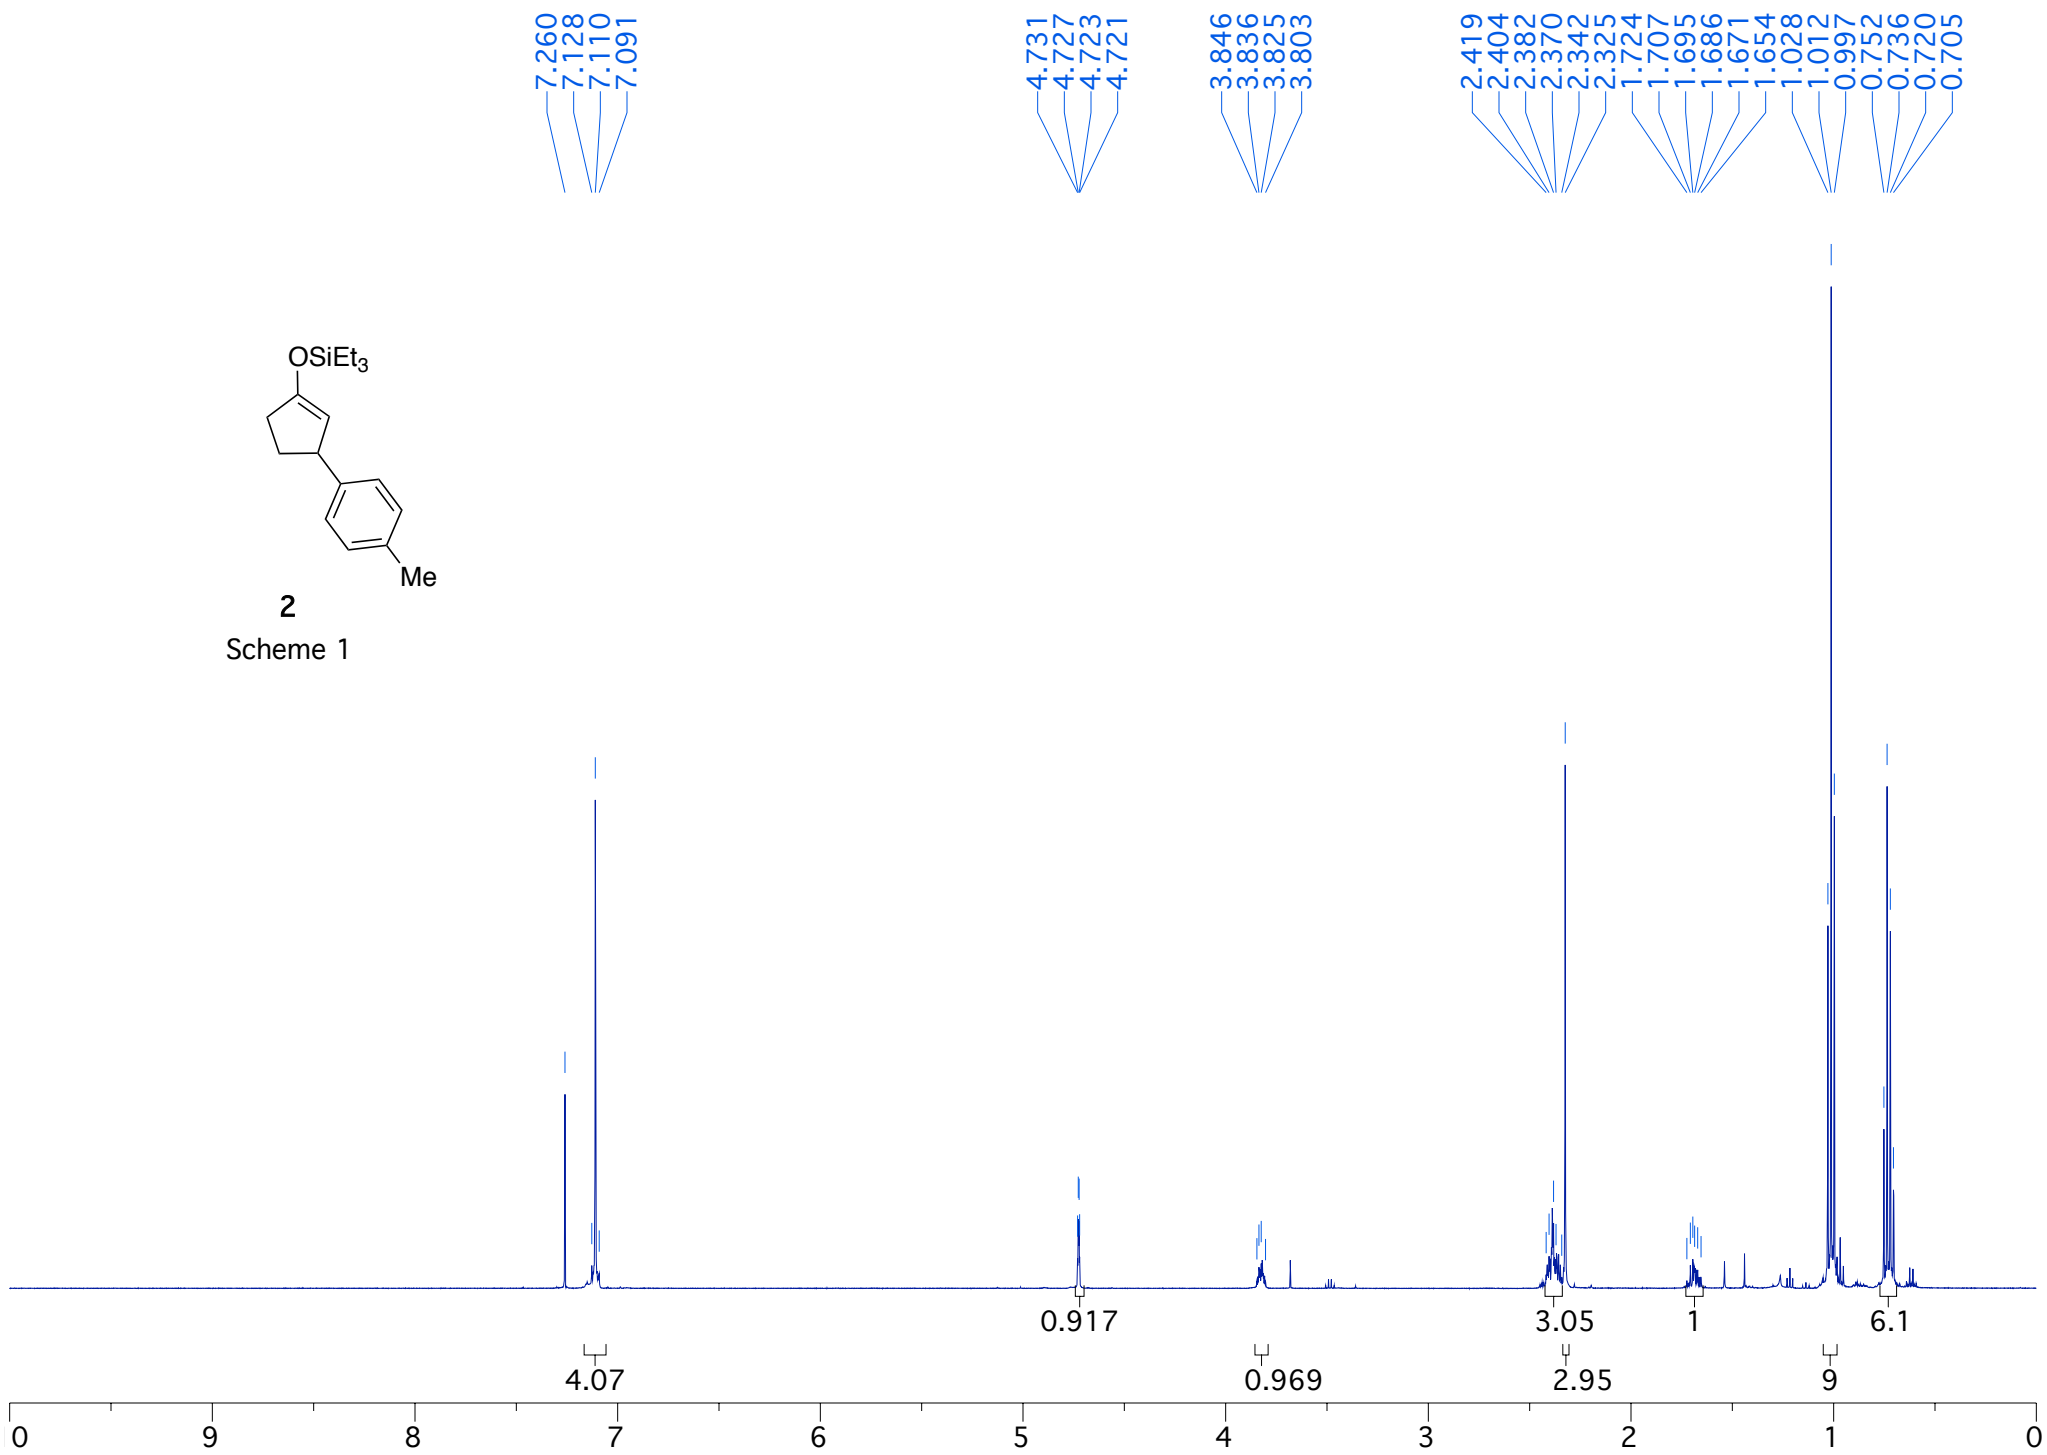

S57

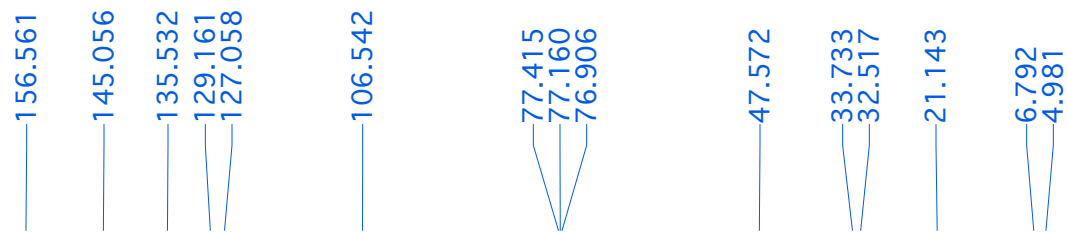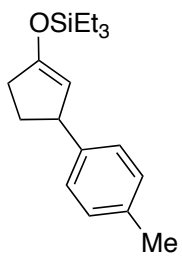

2  
Scheme 1

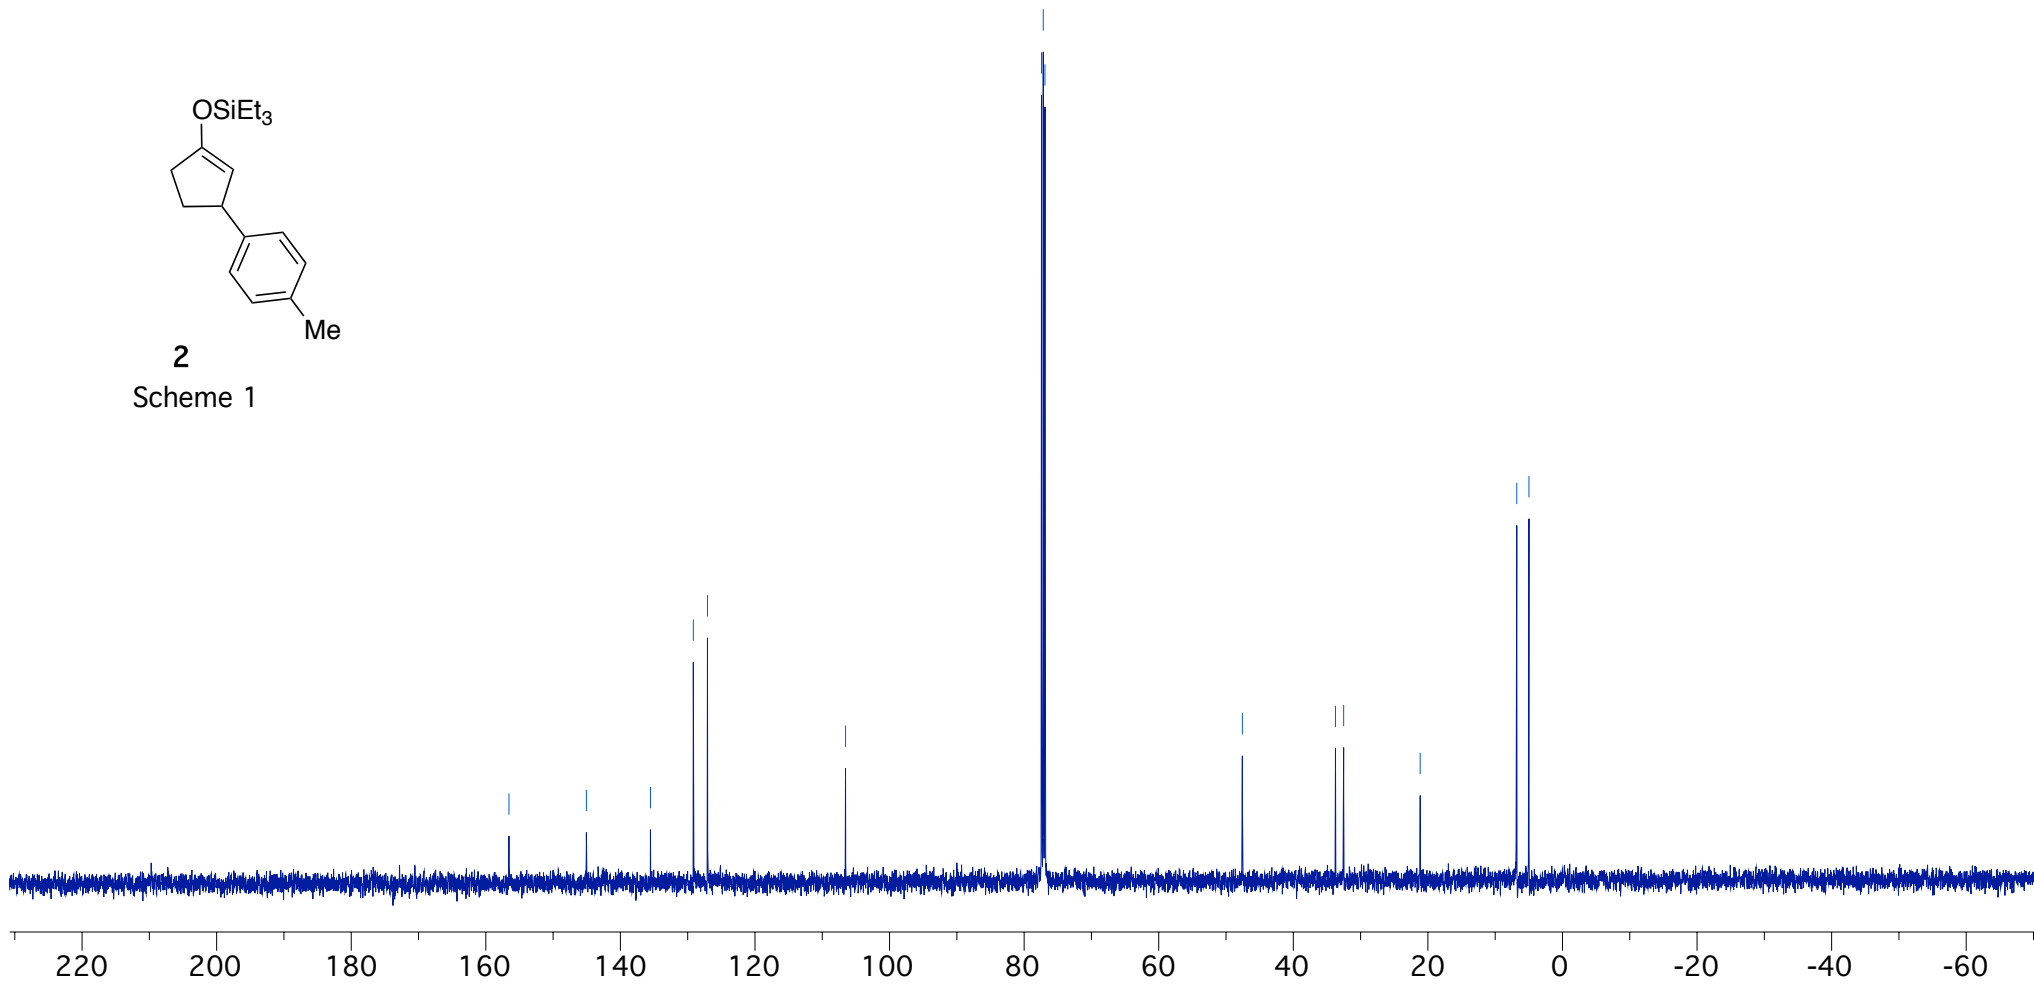

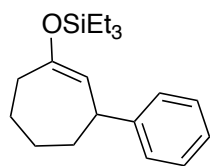**3**

Scheme 1

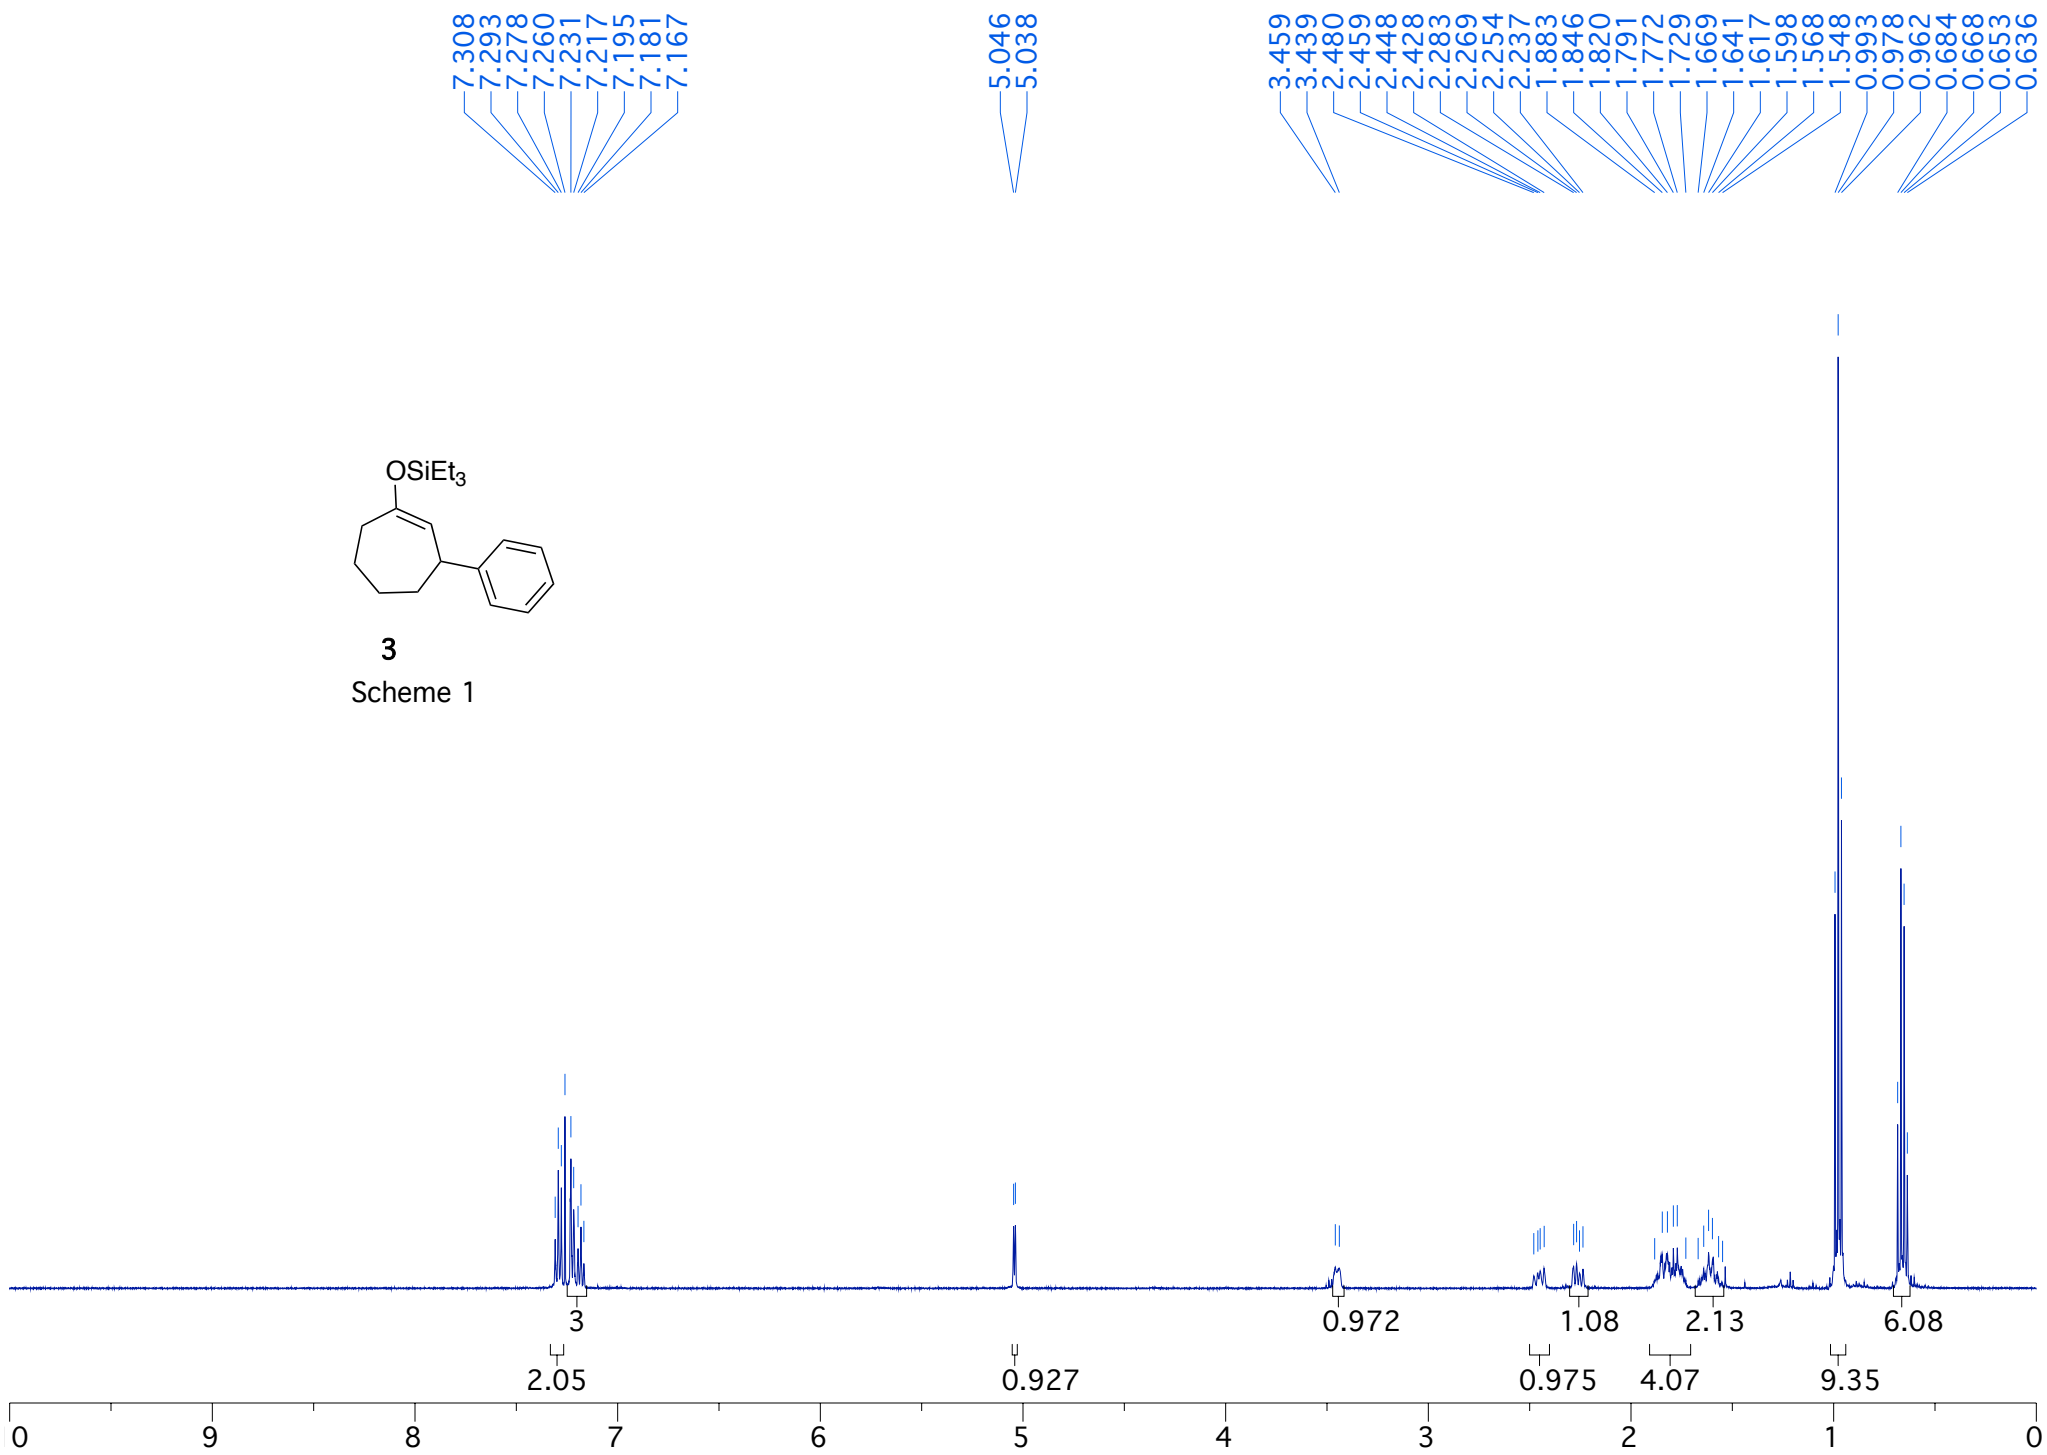





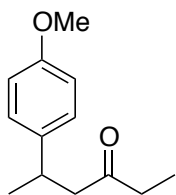**4**

Scheme 1

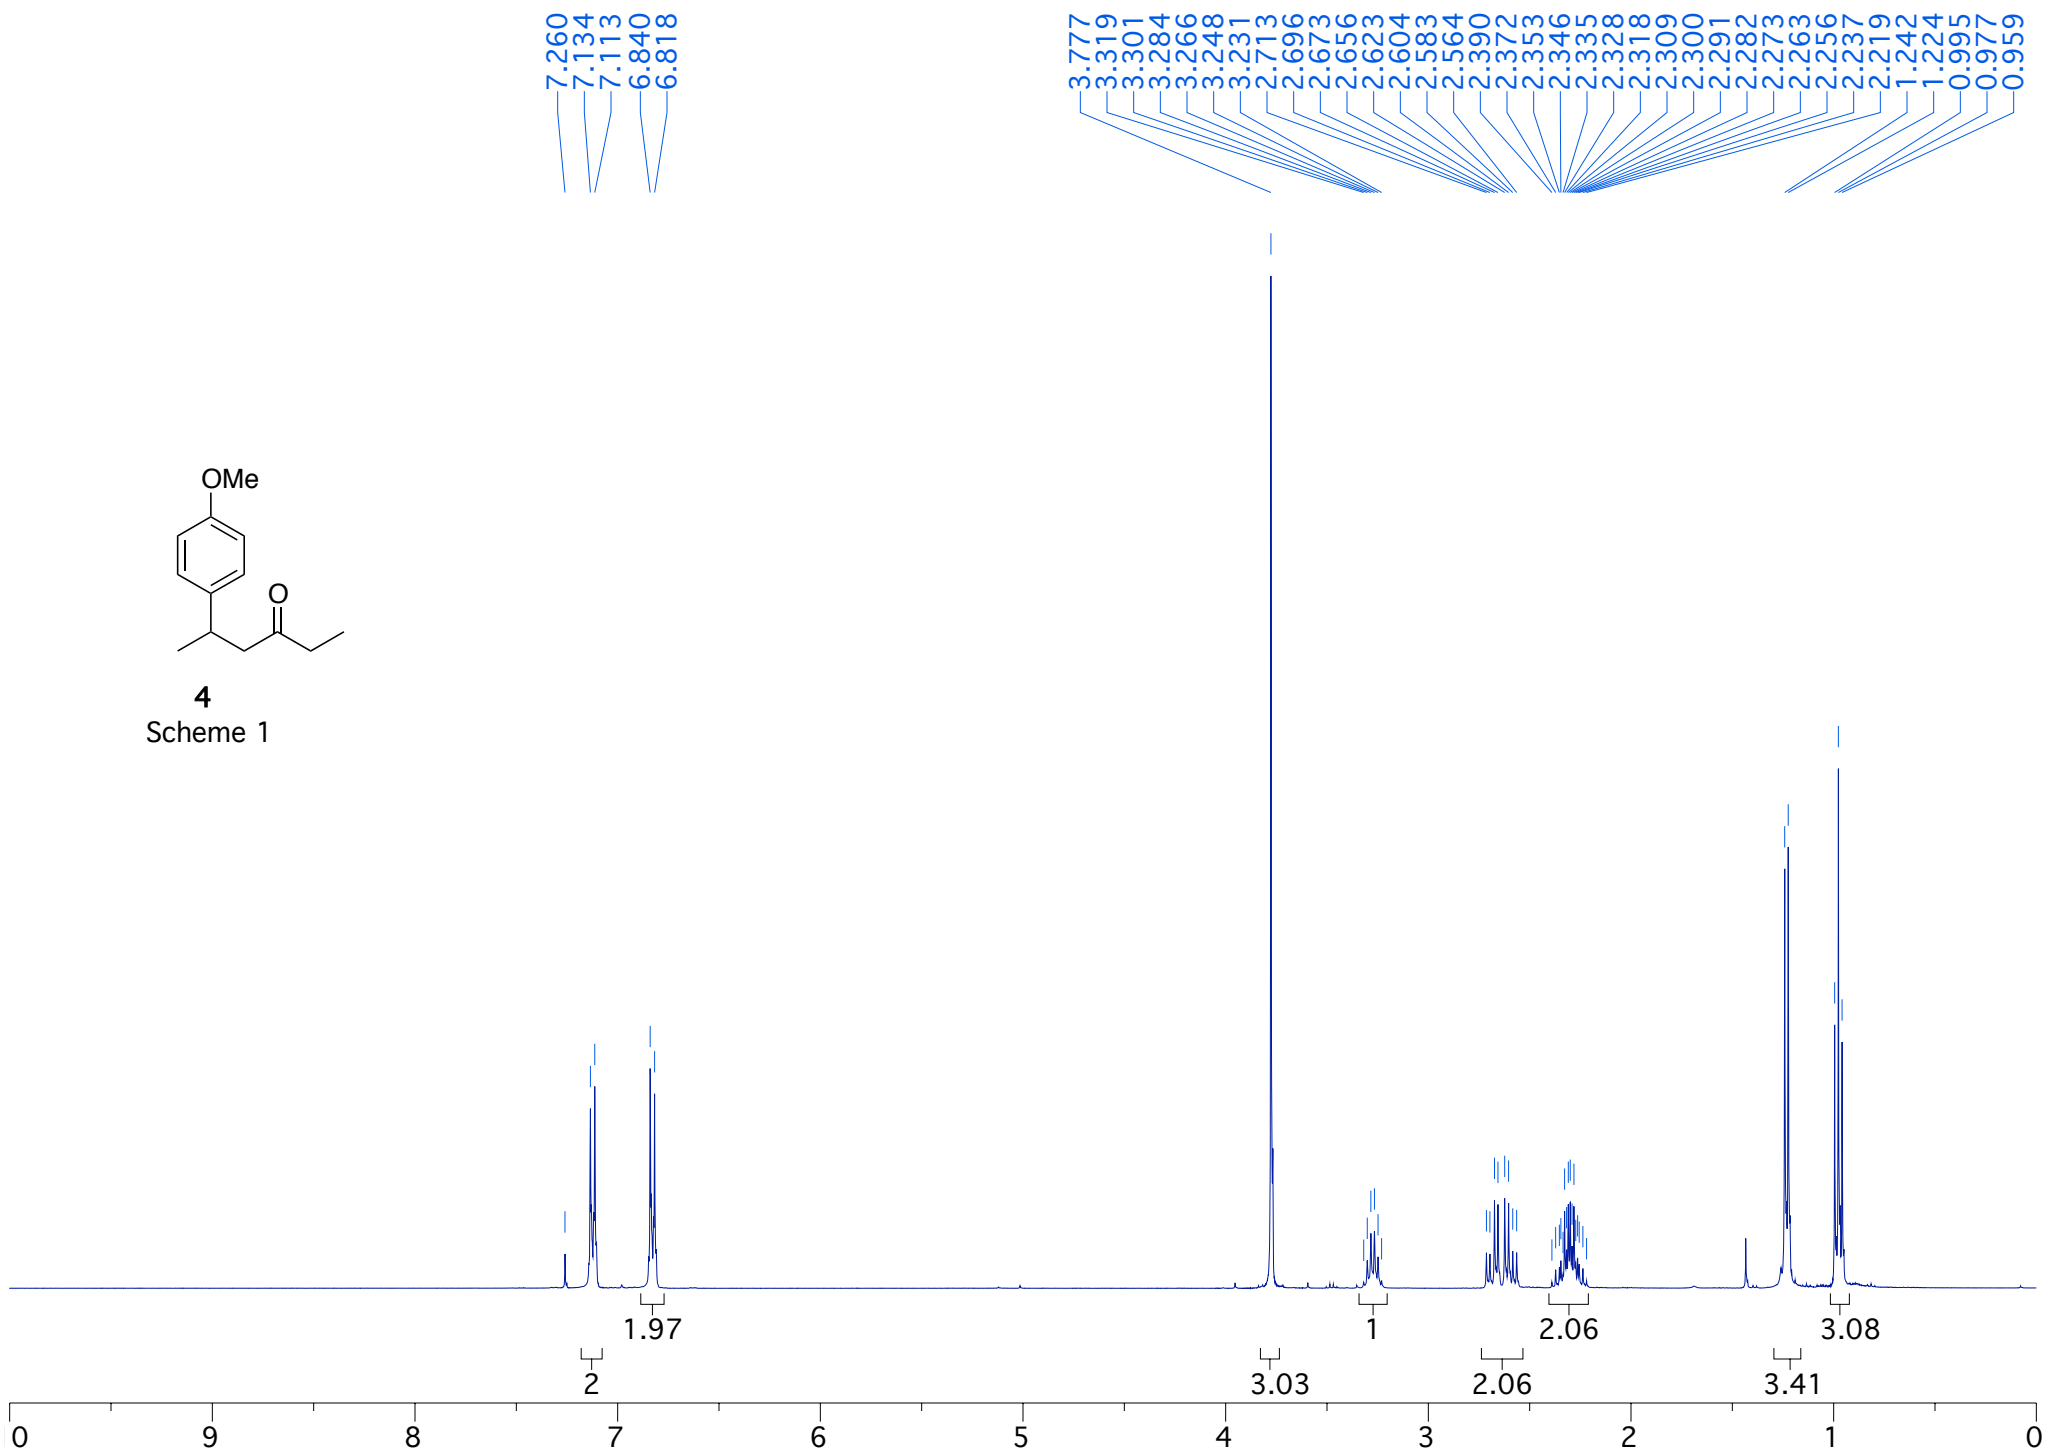

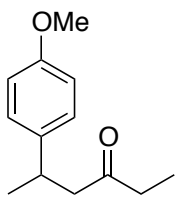

4  
Scheme 1

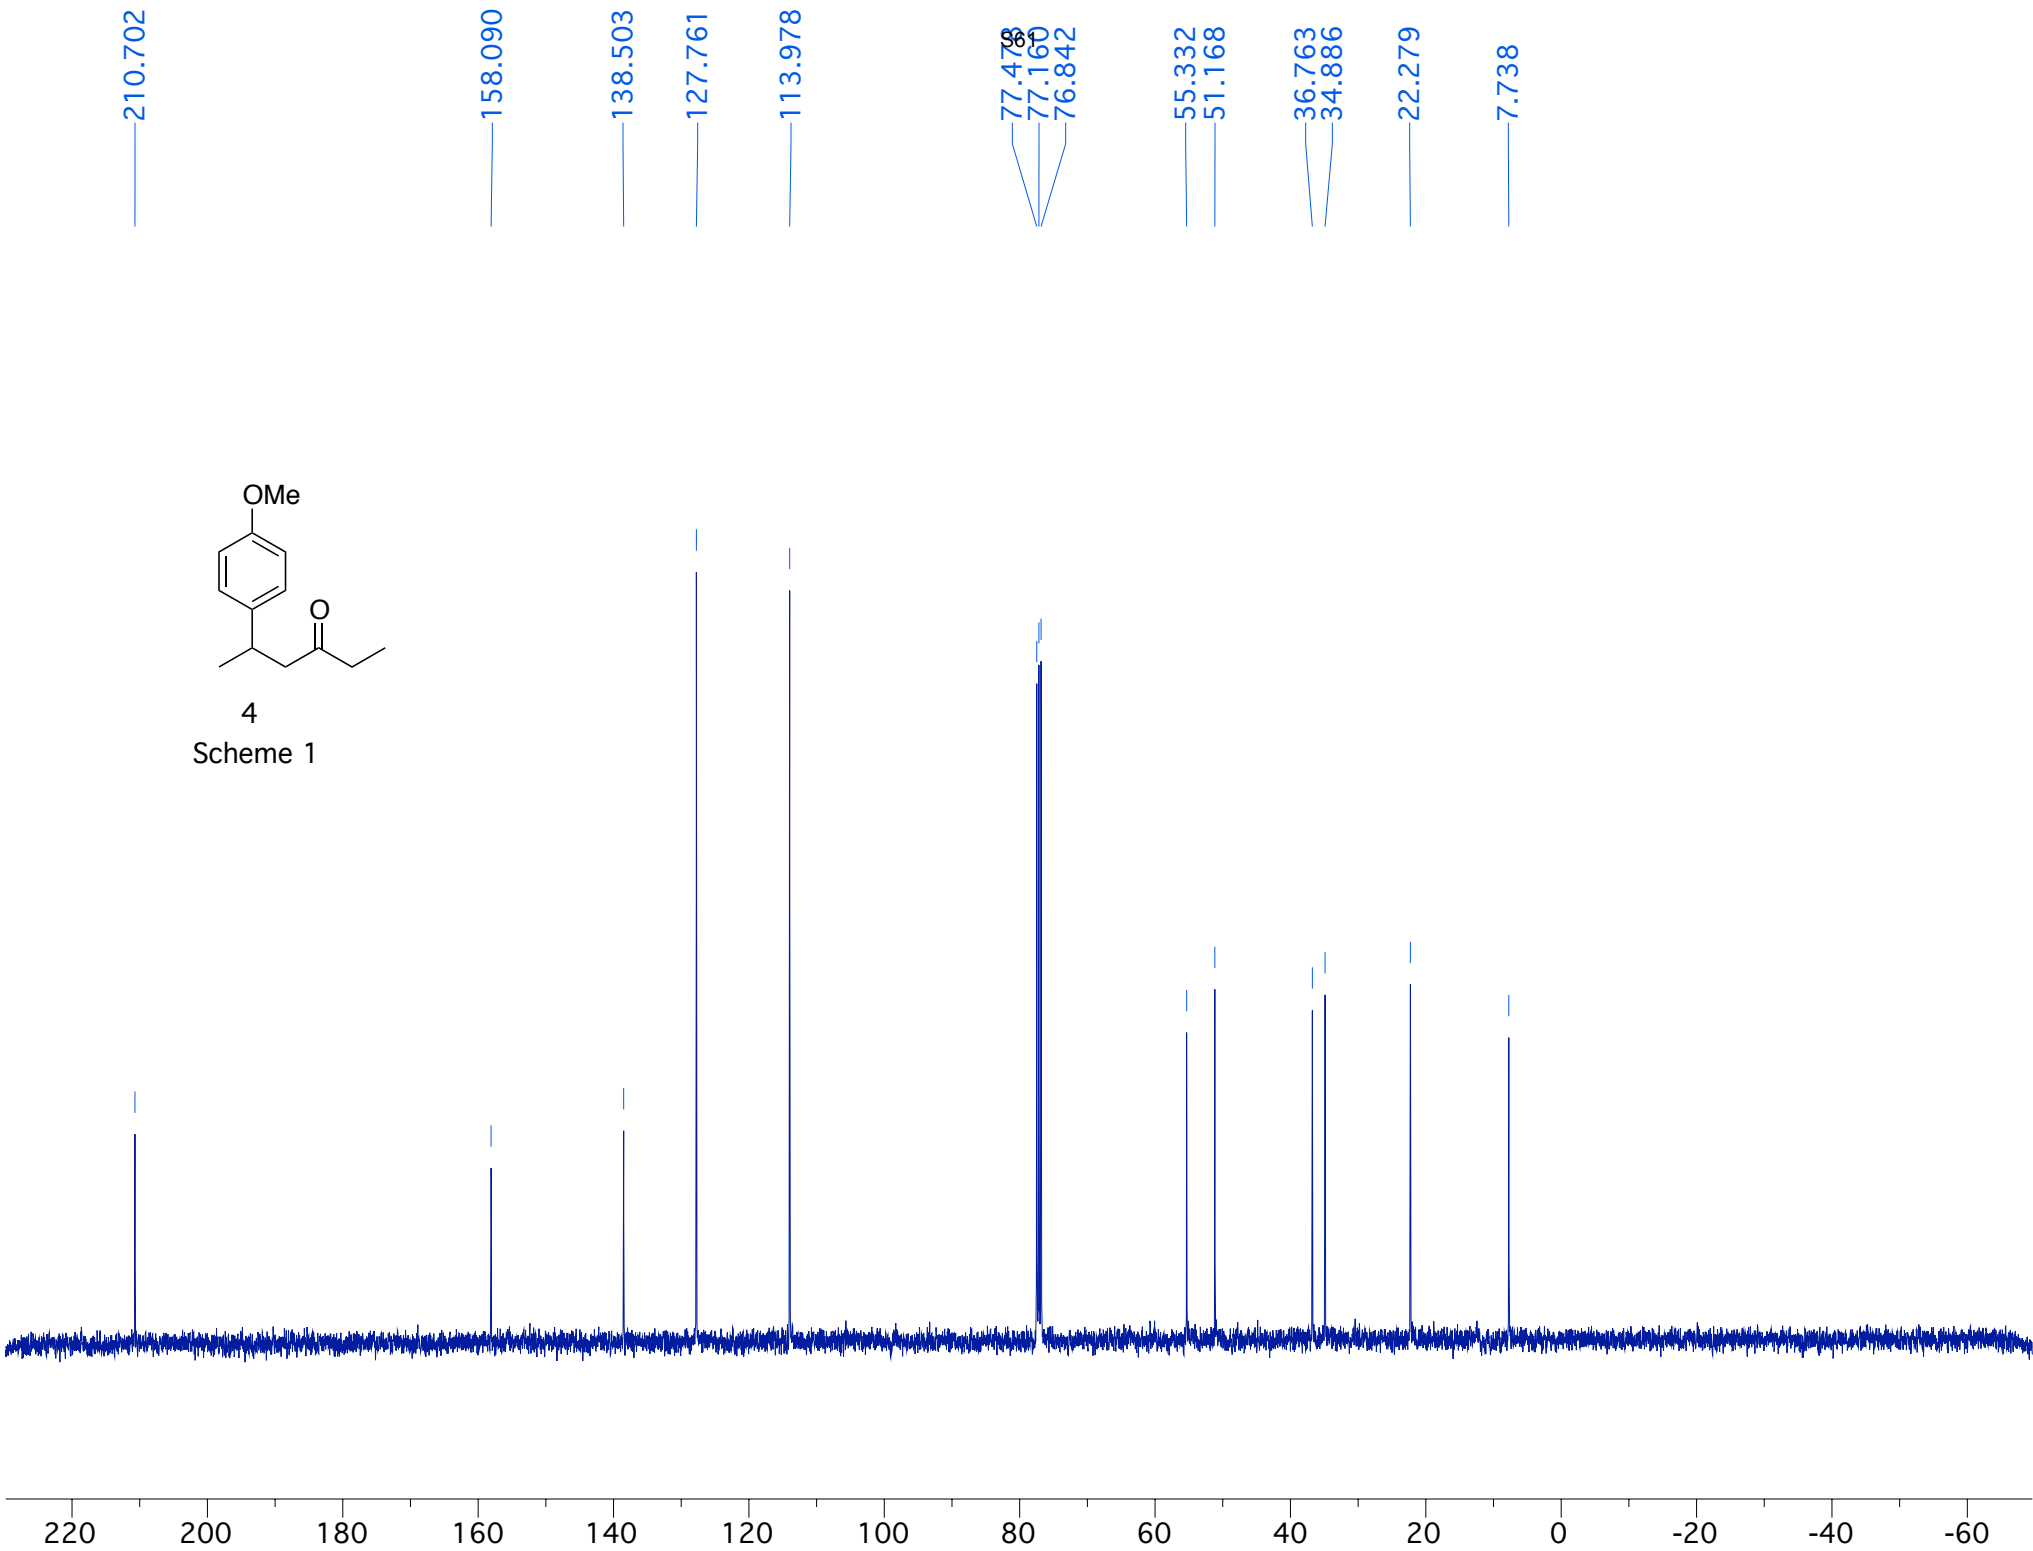

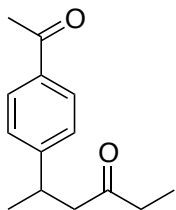

5  
Scheme 1

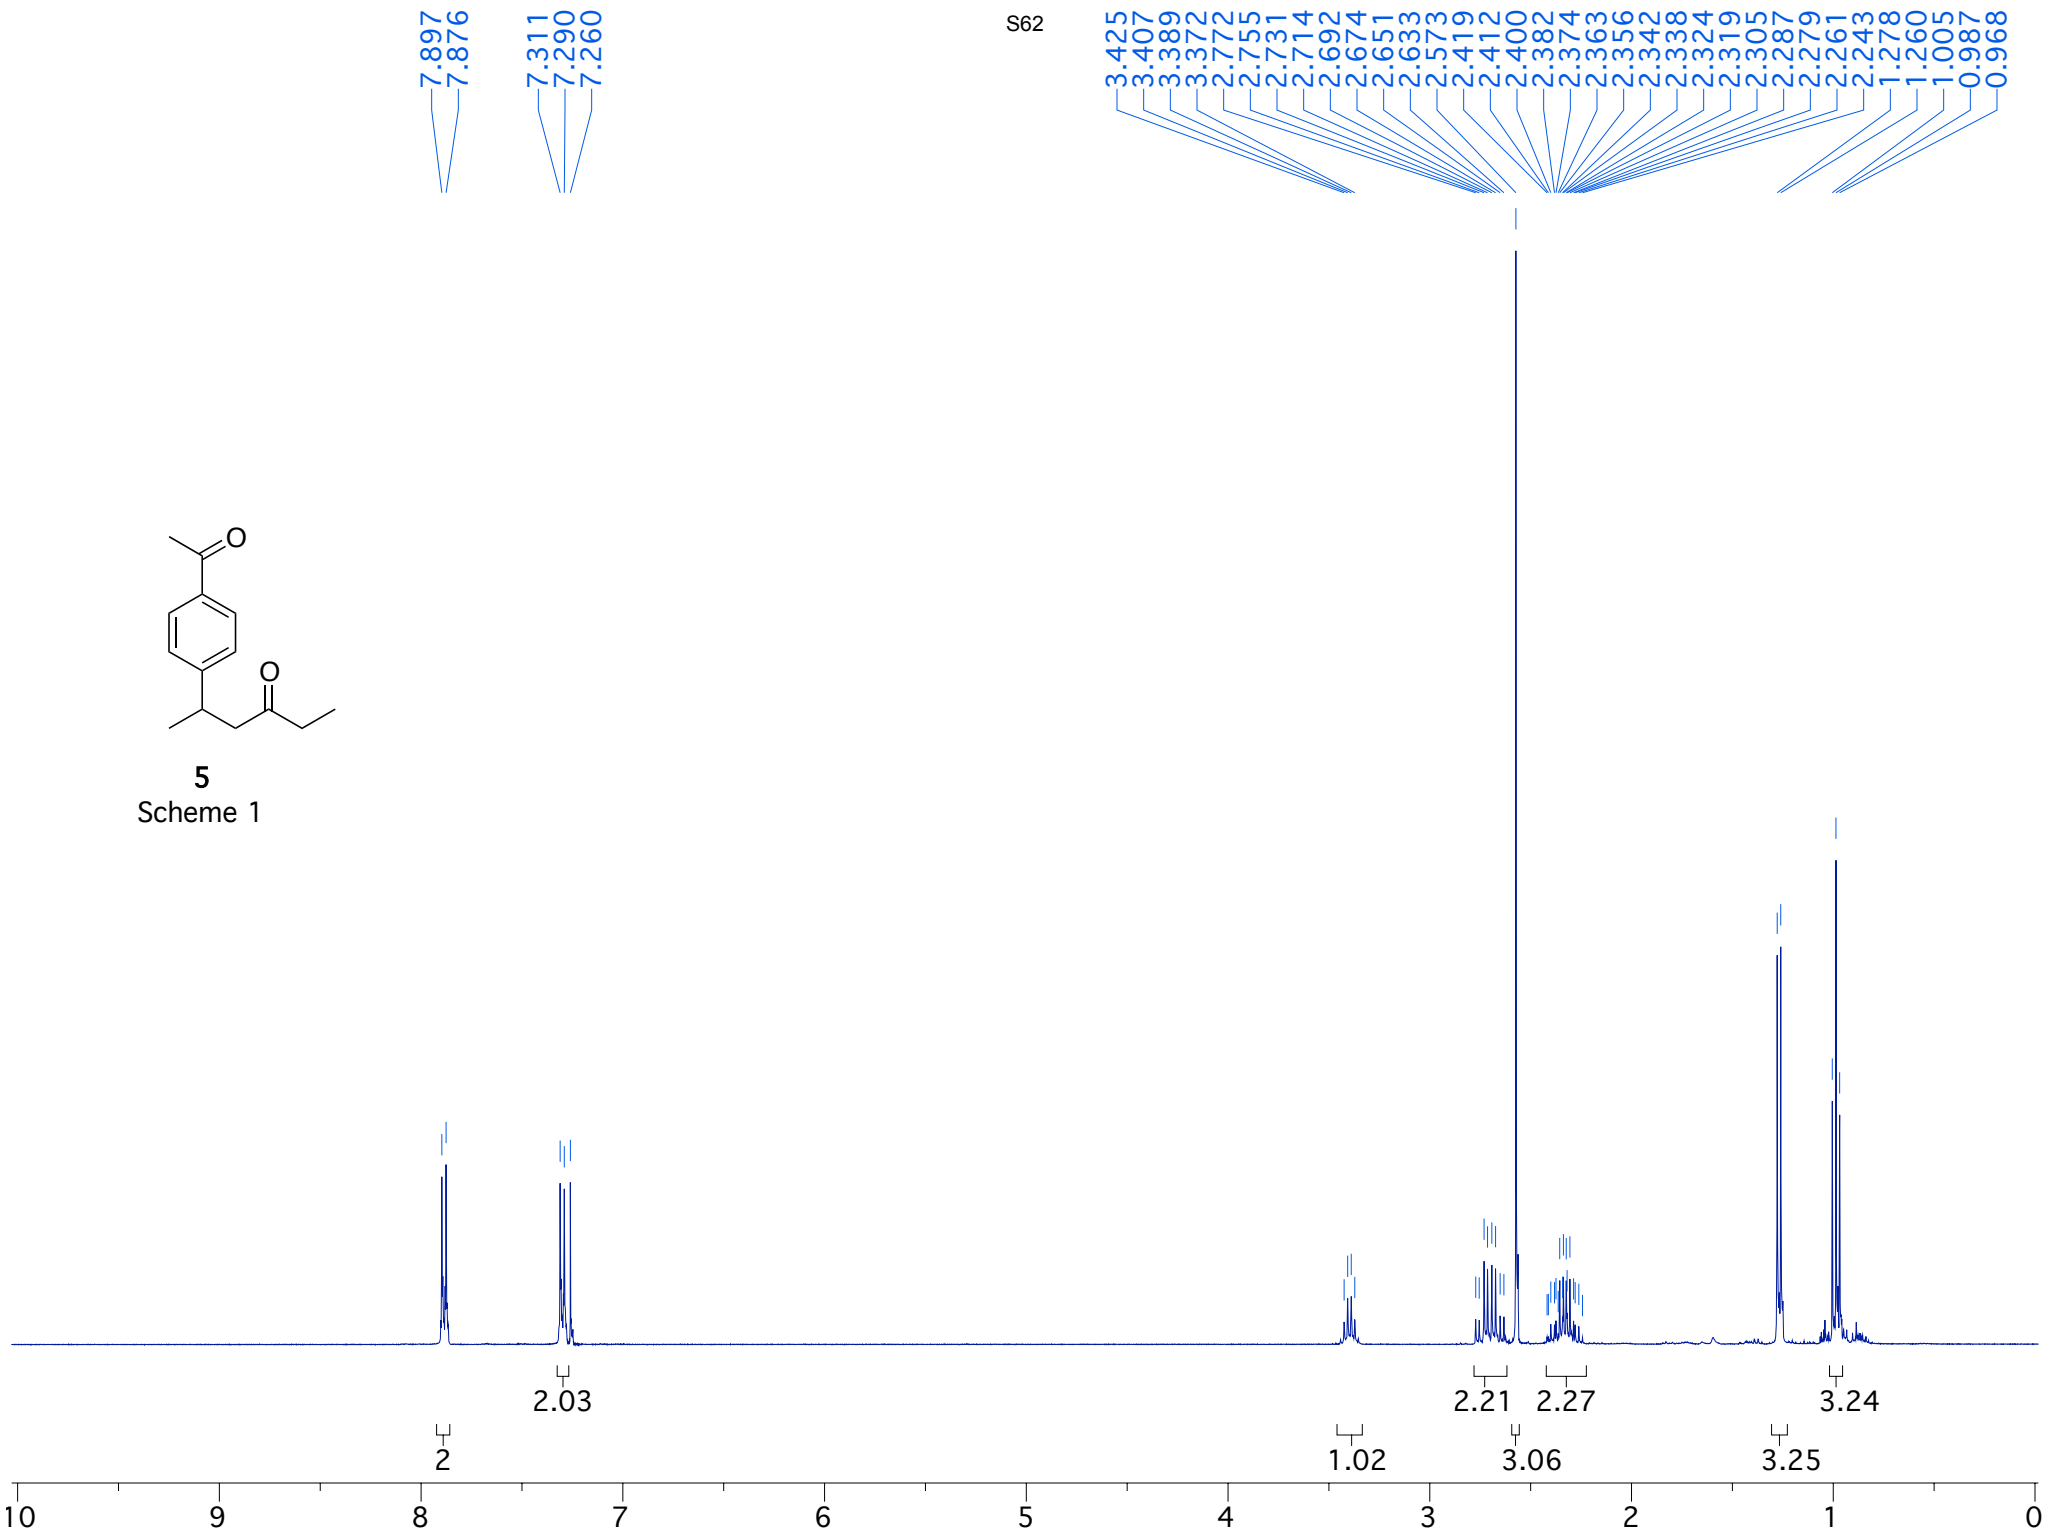

209.754

197.709

152.070

135.450

128.725

127.083

77.478

77.161

76.842

50.214

36.633

35.362

26.562

21.778

7.637

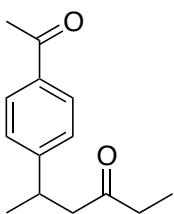

**5**  
Scheme 1

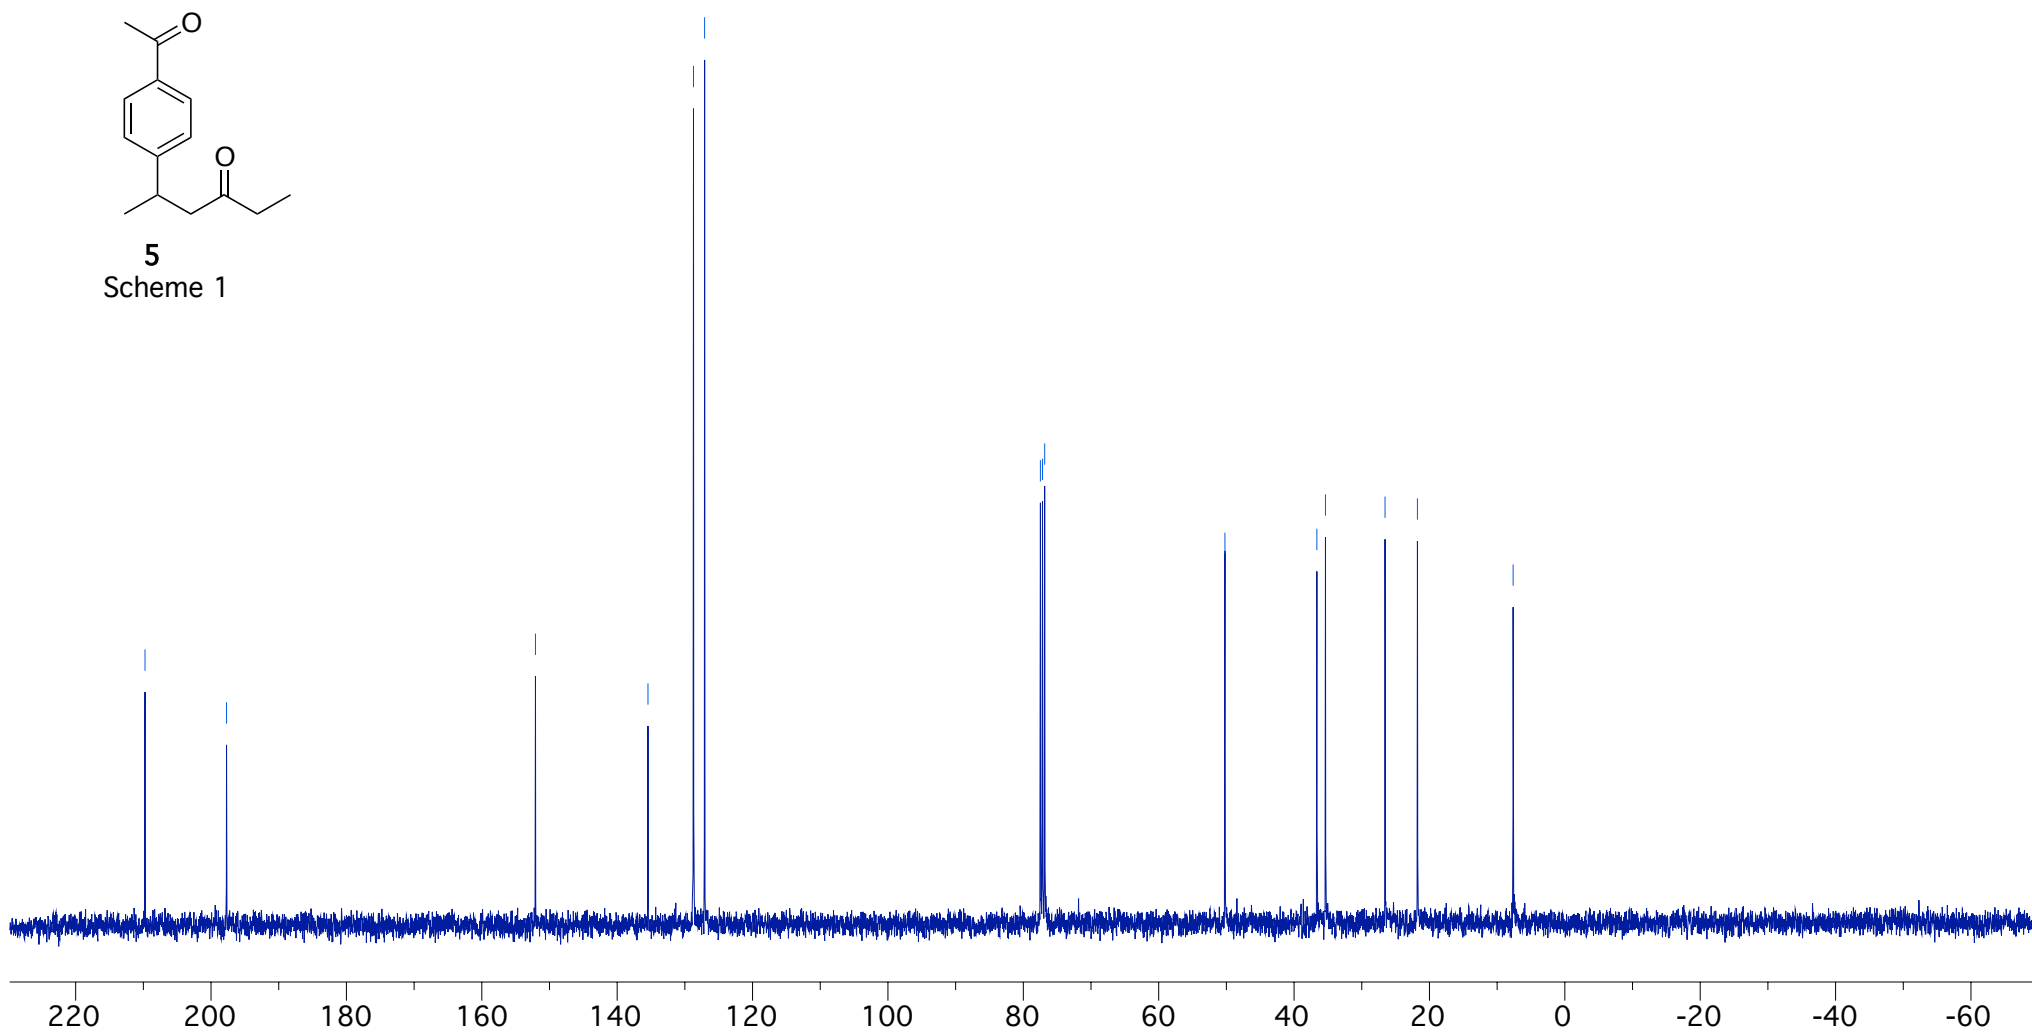

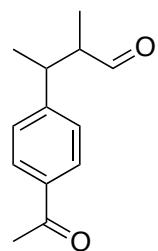**6**

Scheme 1

1 : 1 ratio of diastereomers

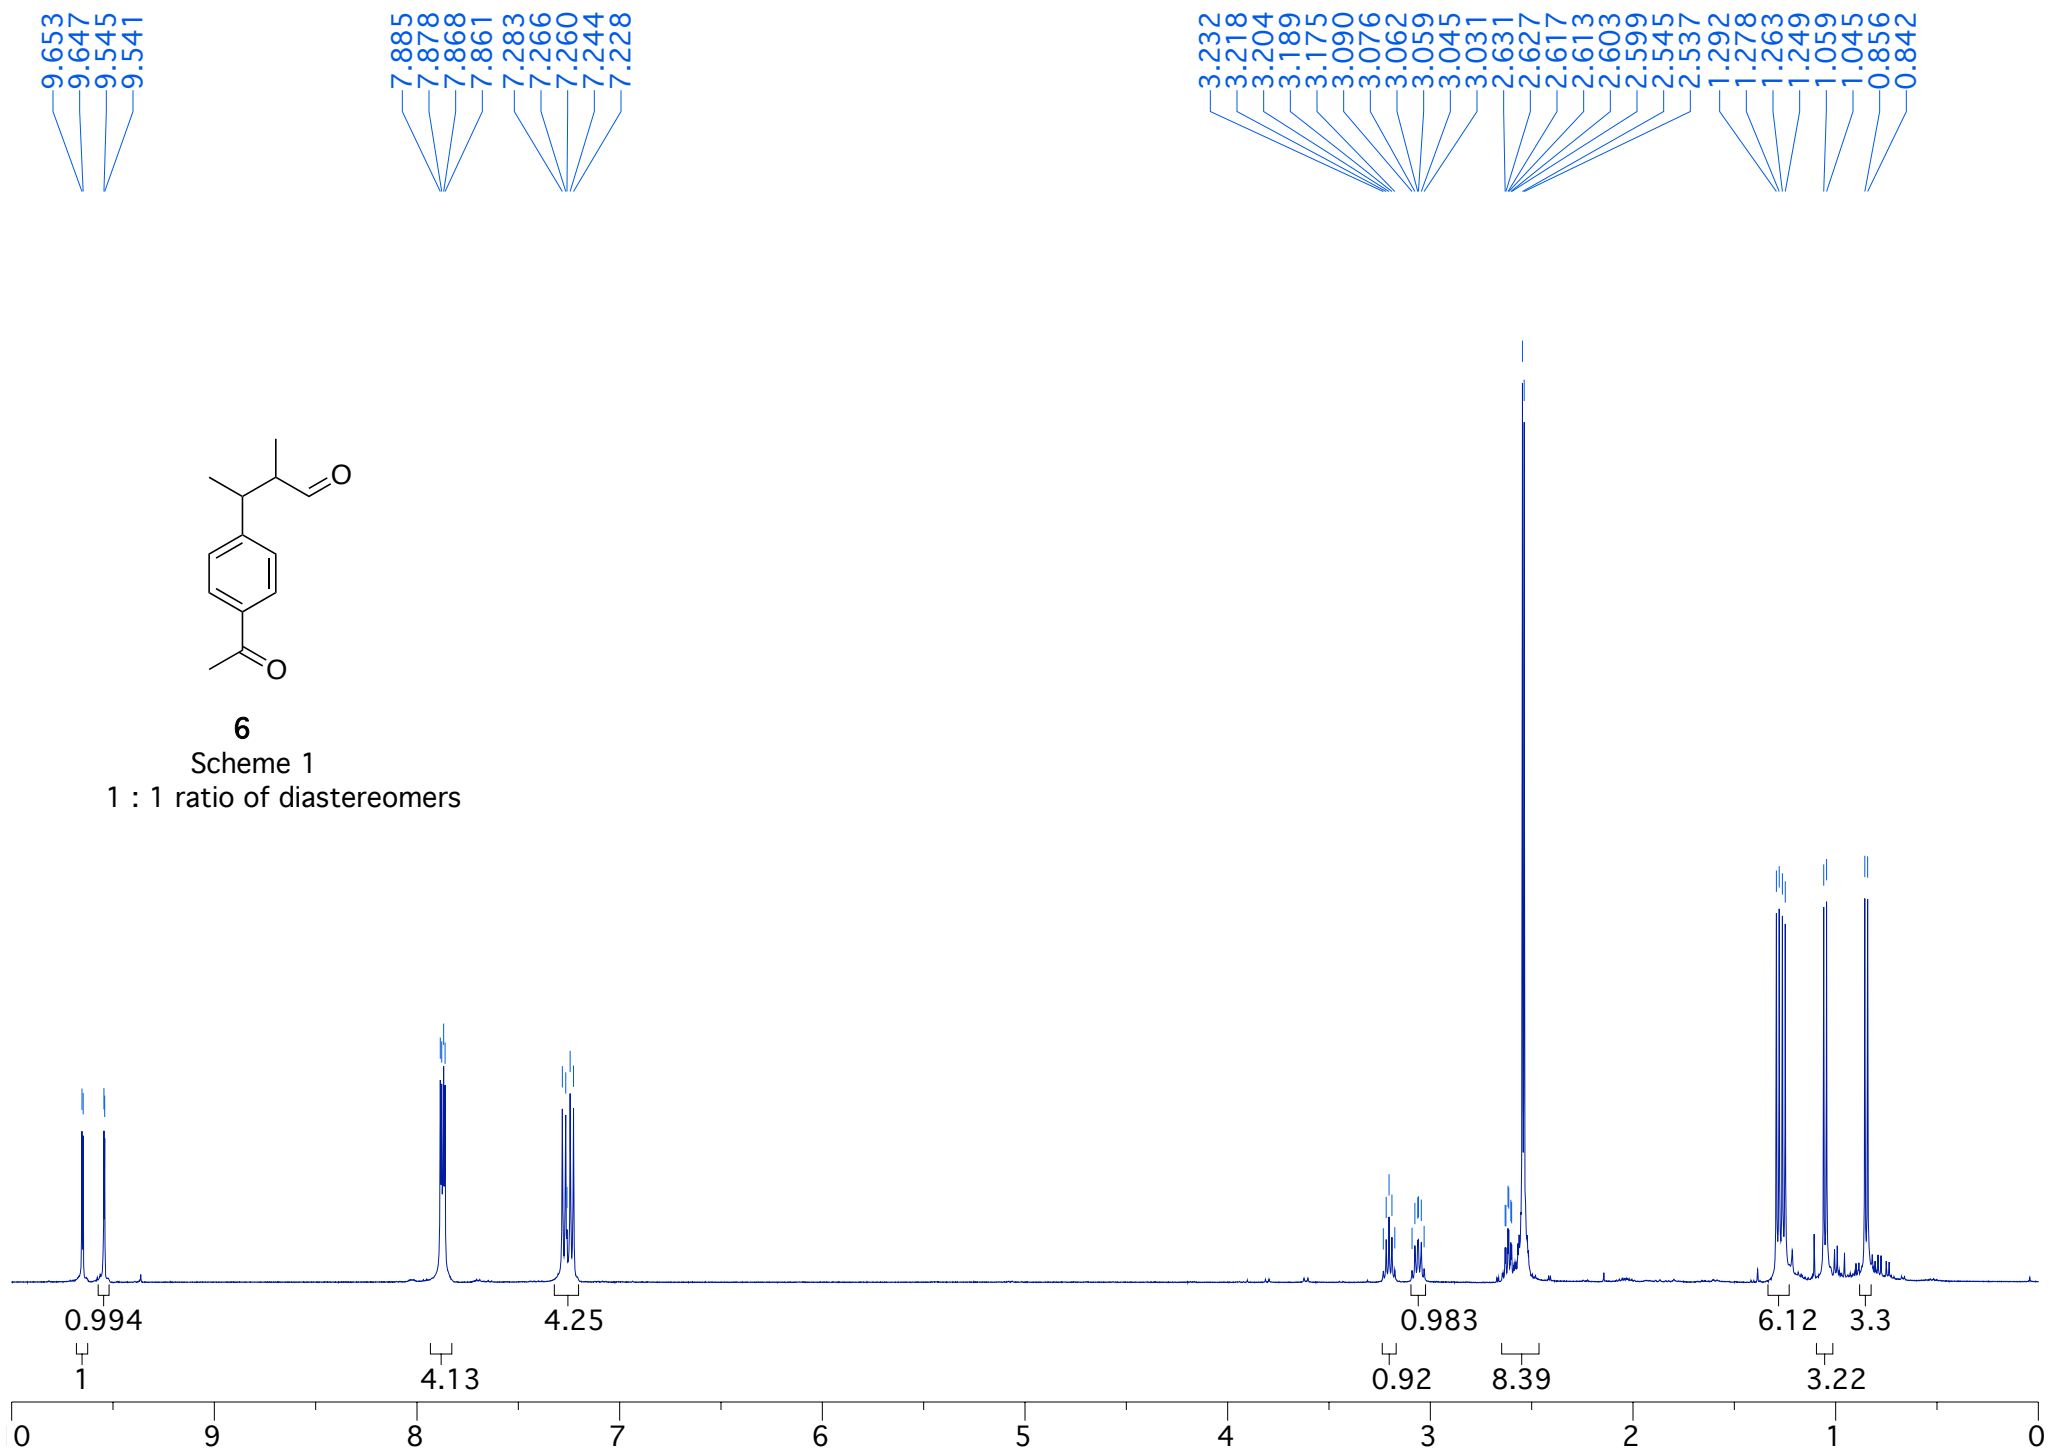

204.116  
203.988  
197.676

150.012  
149.405  
135.755  
135.650  
128.721  
127.893  
127.715

77.415  
77.160  
76.905

52.520  
52.263

40.779  
40.018

26.574  
19.869  
17.162  
12.435  
10.396

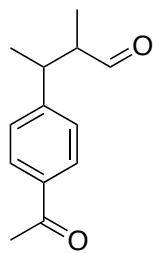

**6**

Scheme 1

1 : 1 ratio of diastereomers

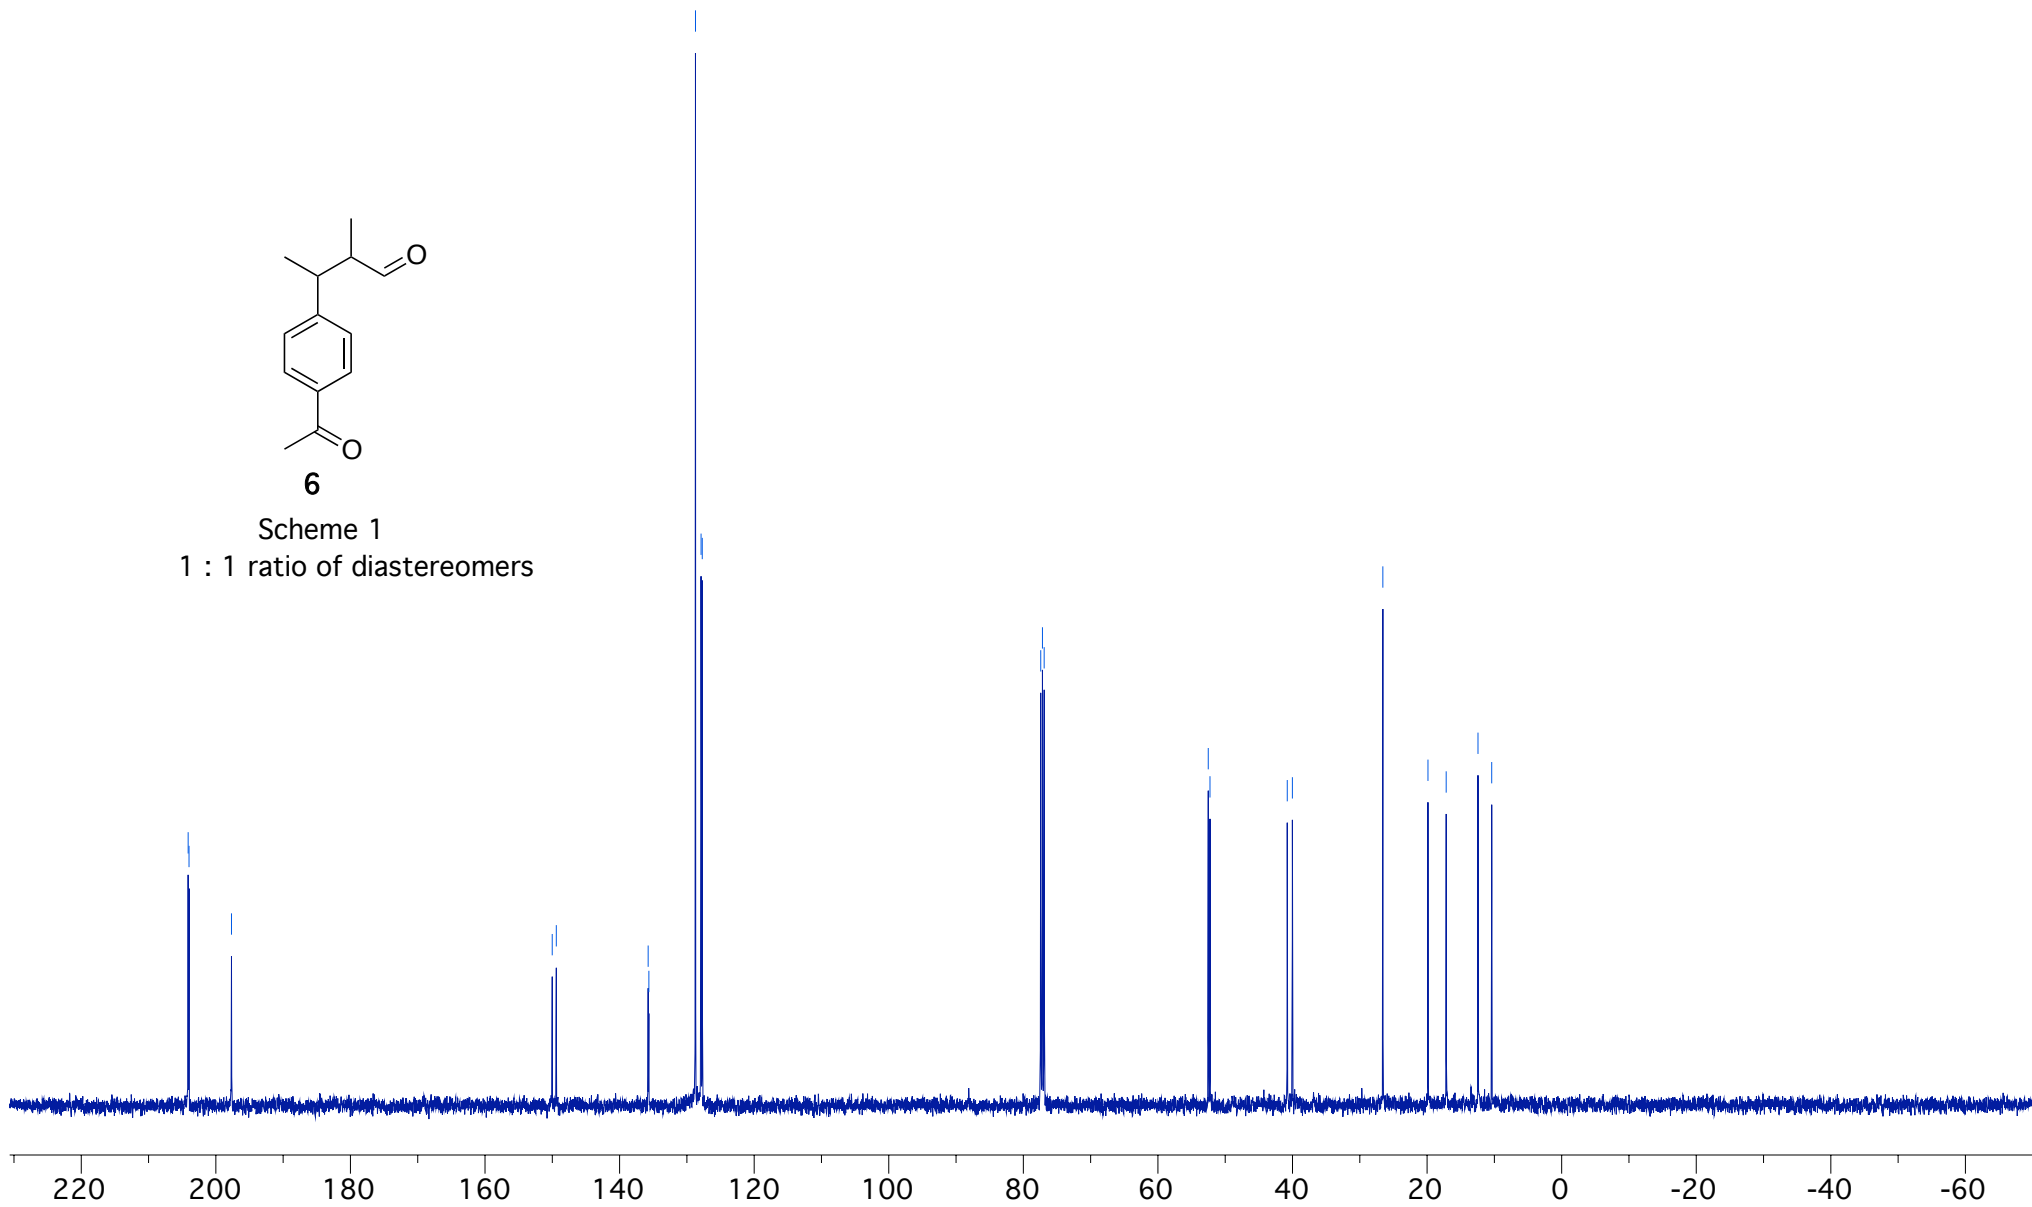

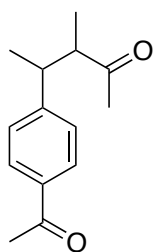**7**

Scheme 1

6 : 1 ratio of diastereomers

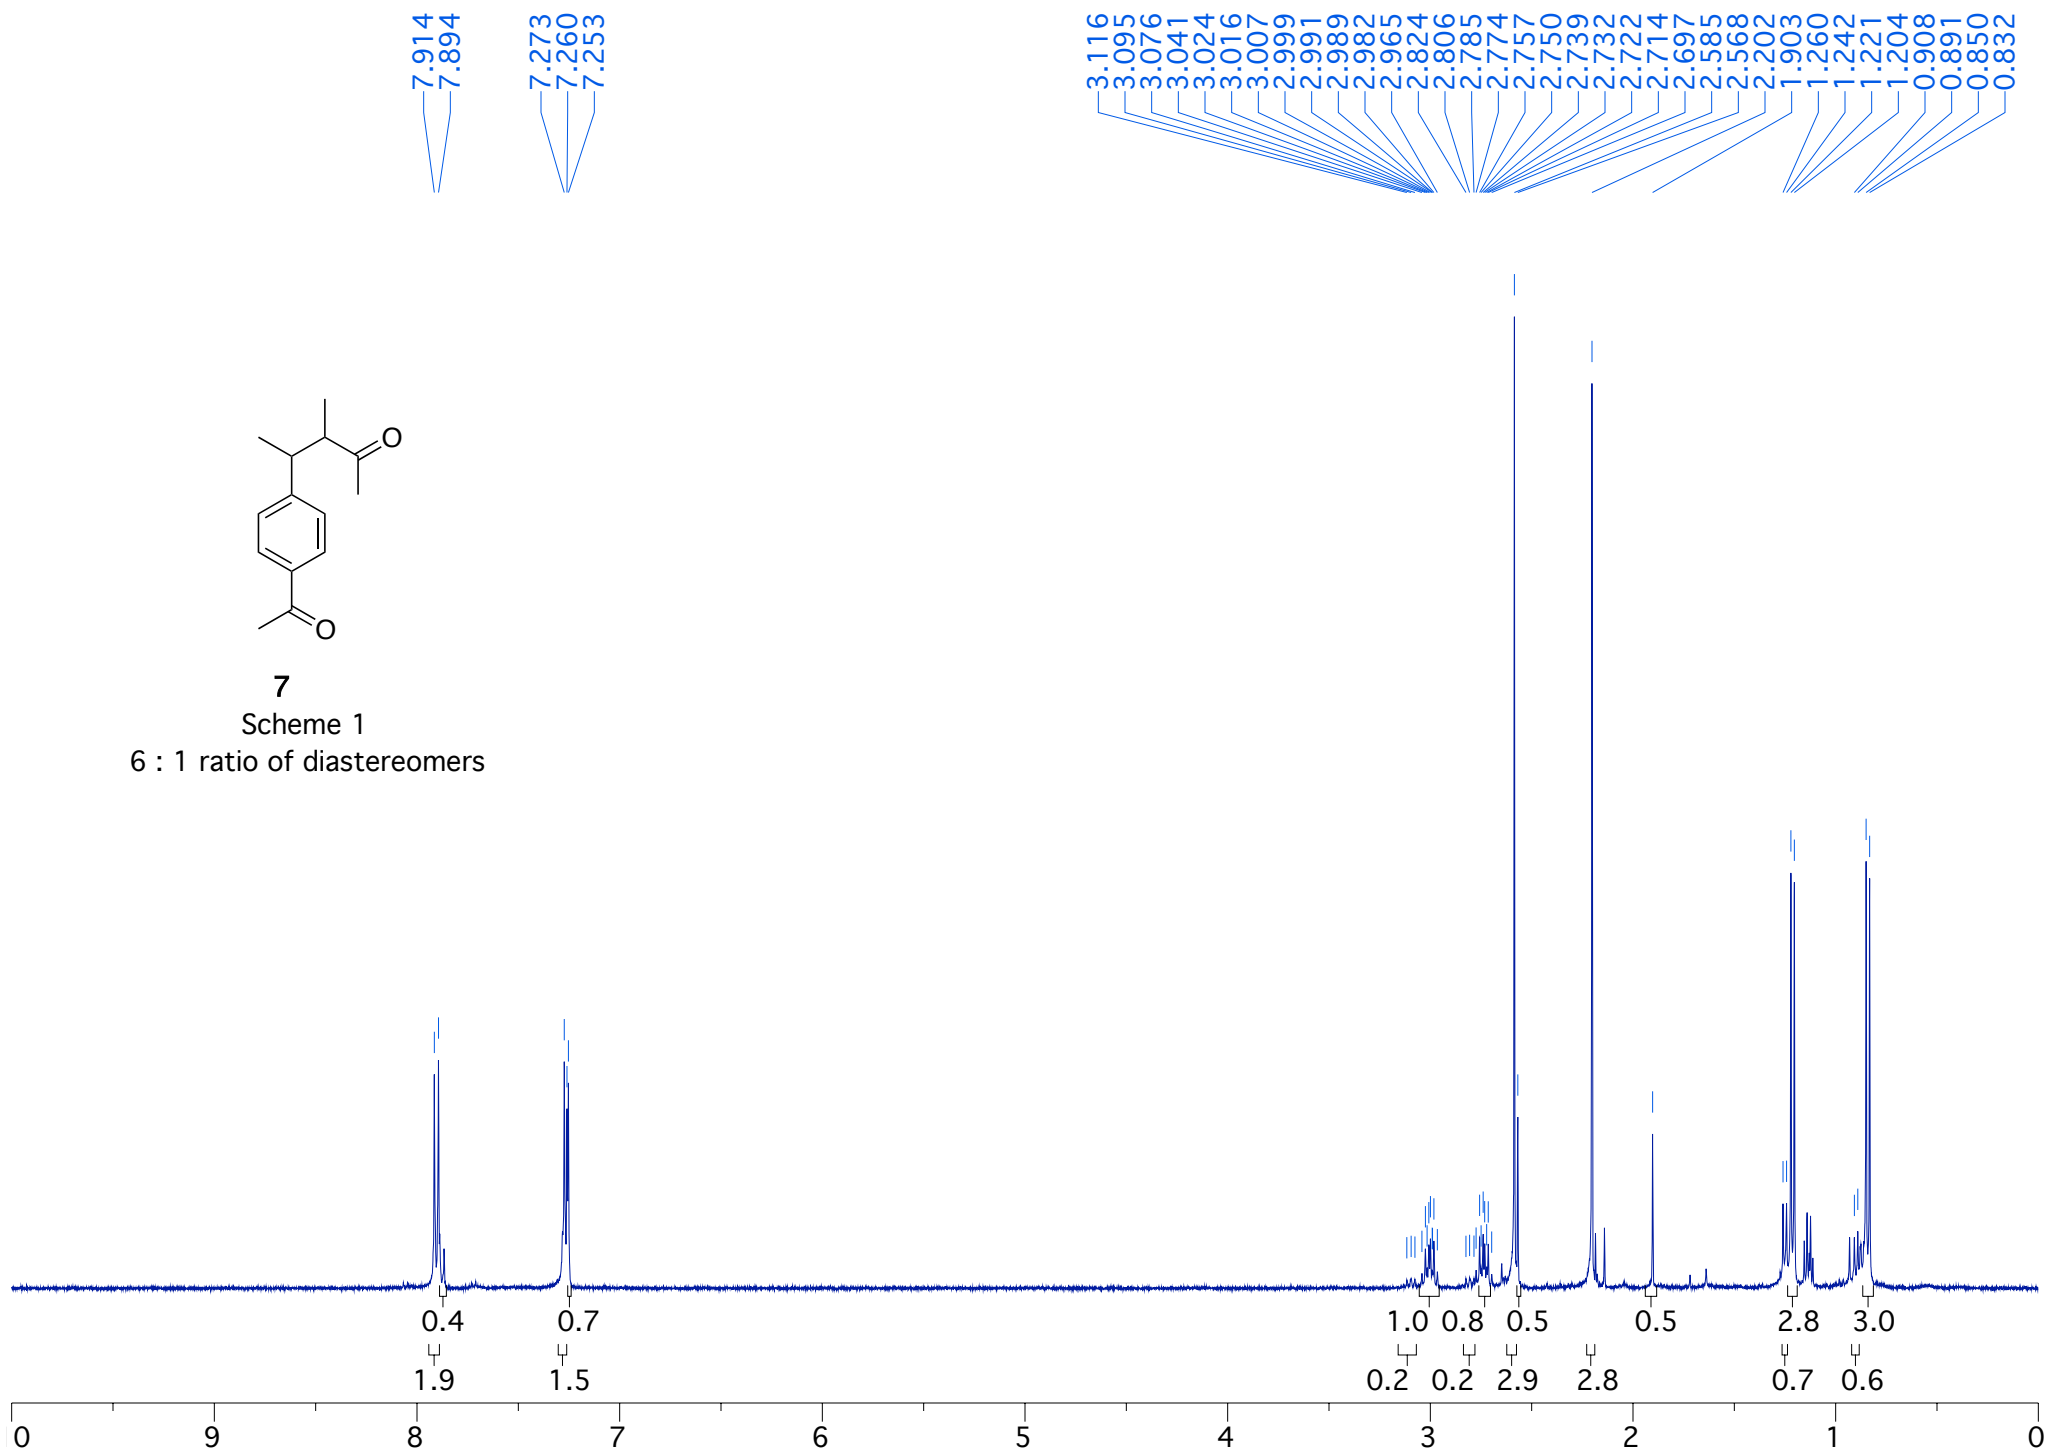



212.301

197.823

150.466

135.804

128.825

127.937

77.413

77.160

76.906

53.636

42.789

29.549

26.694

20.566

16.076

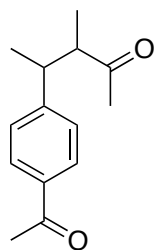**7**

Scheme 1

6 : 1 ratio of diastereomers

peaks picked for major diastereomer only

peaks for minor diastereomer could not be resolved

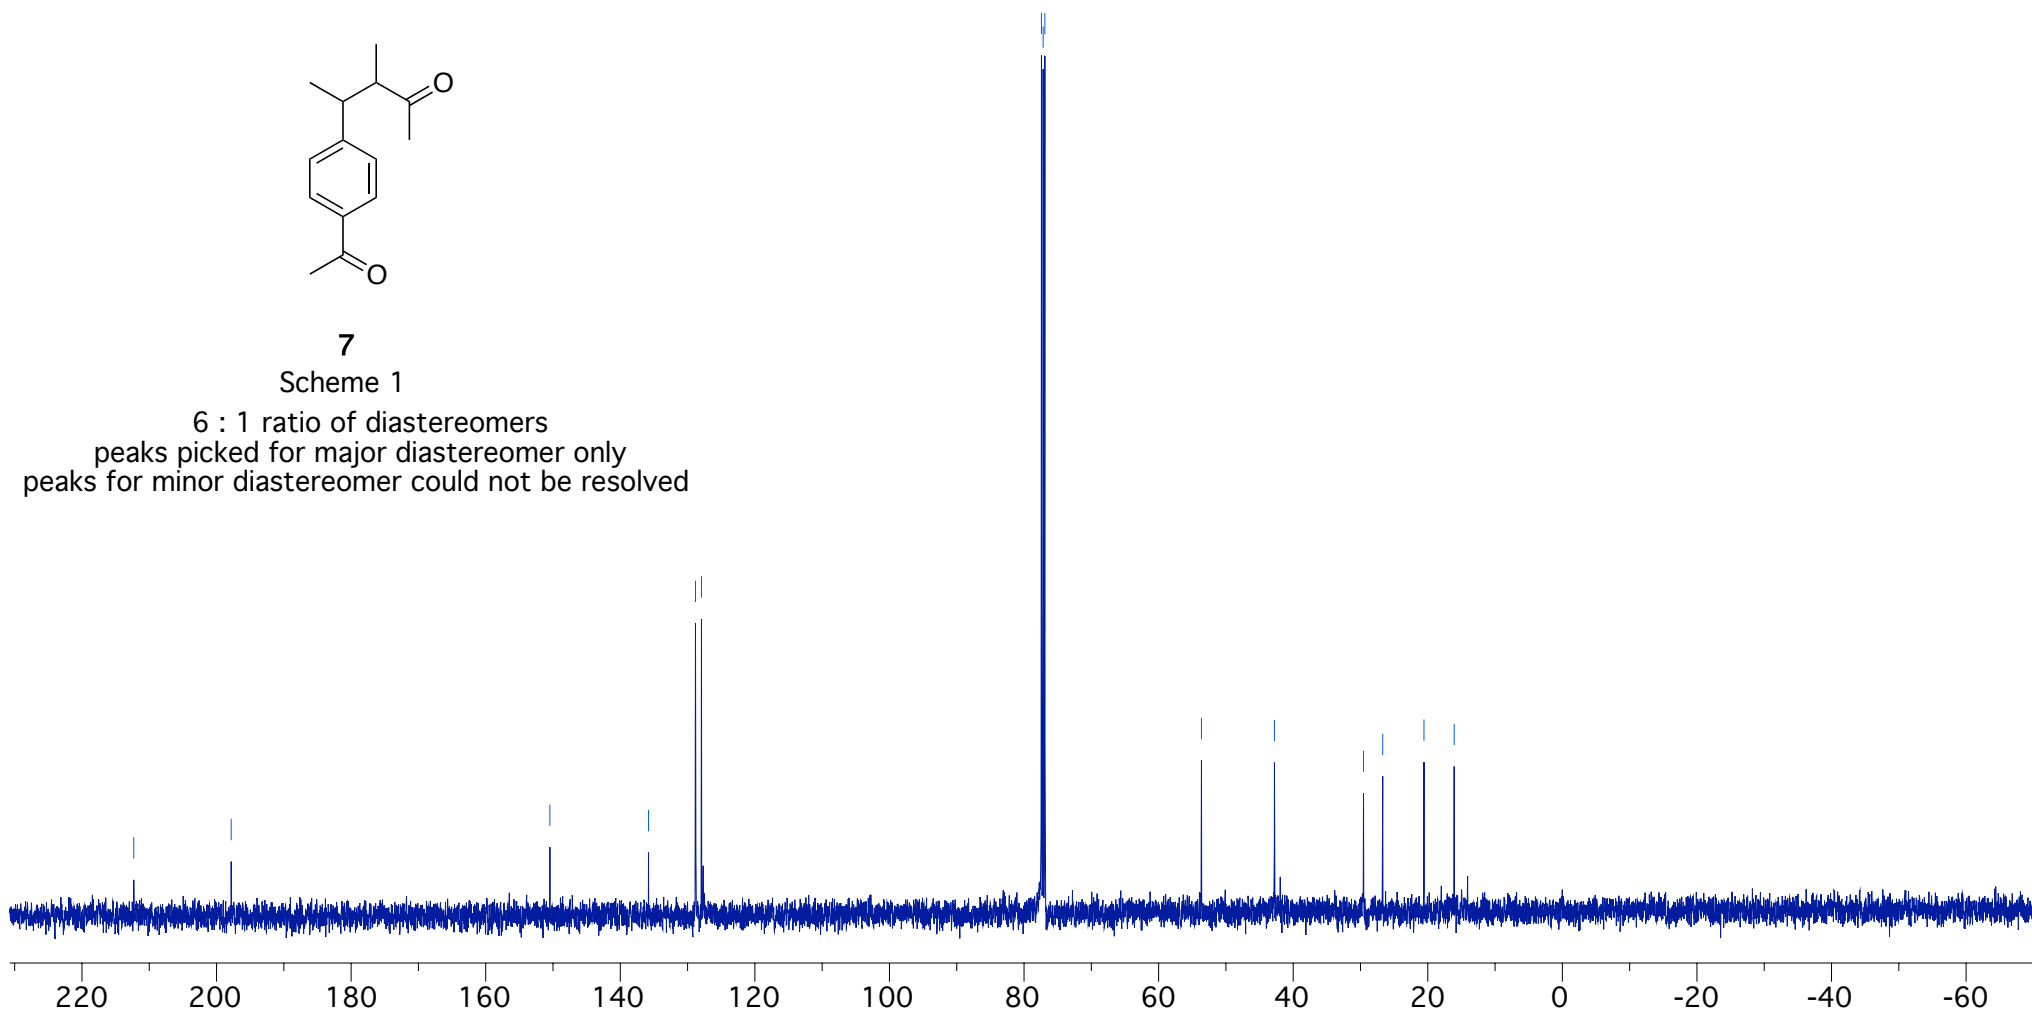

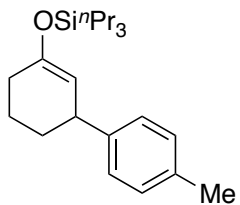

**8**  
Scheme 1

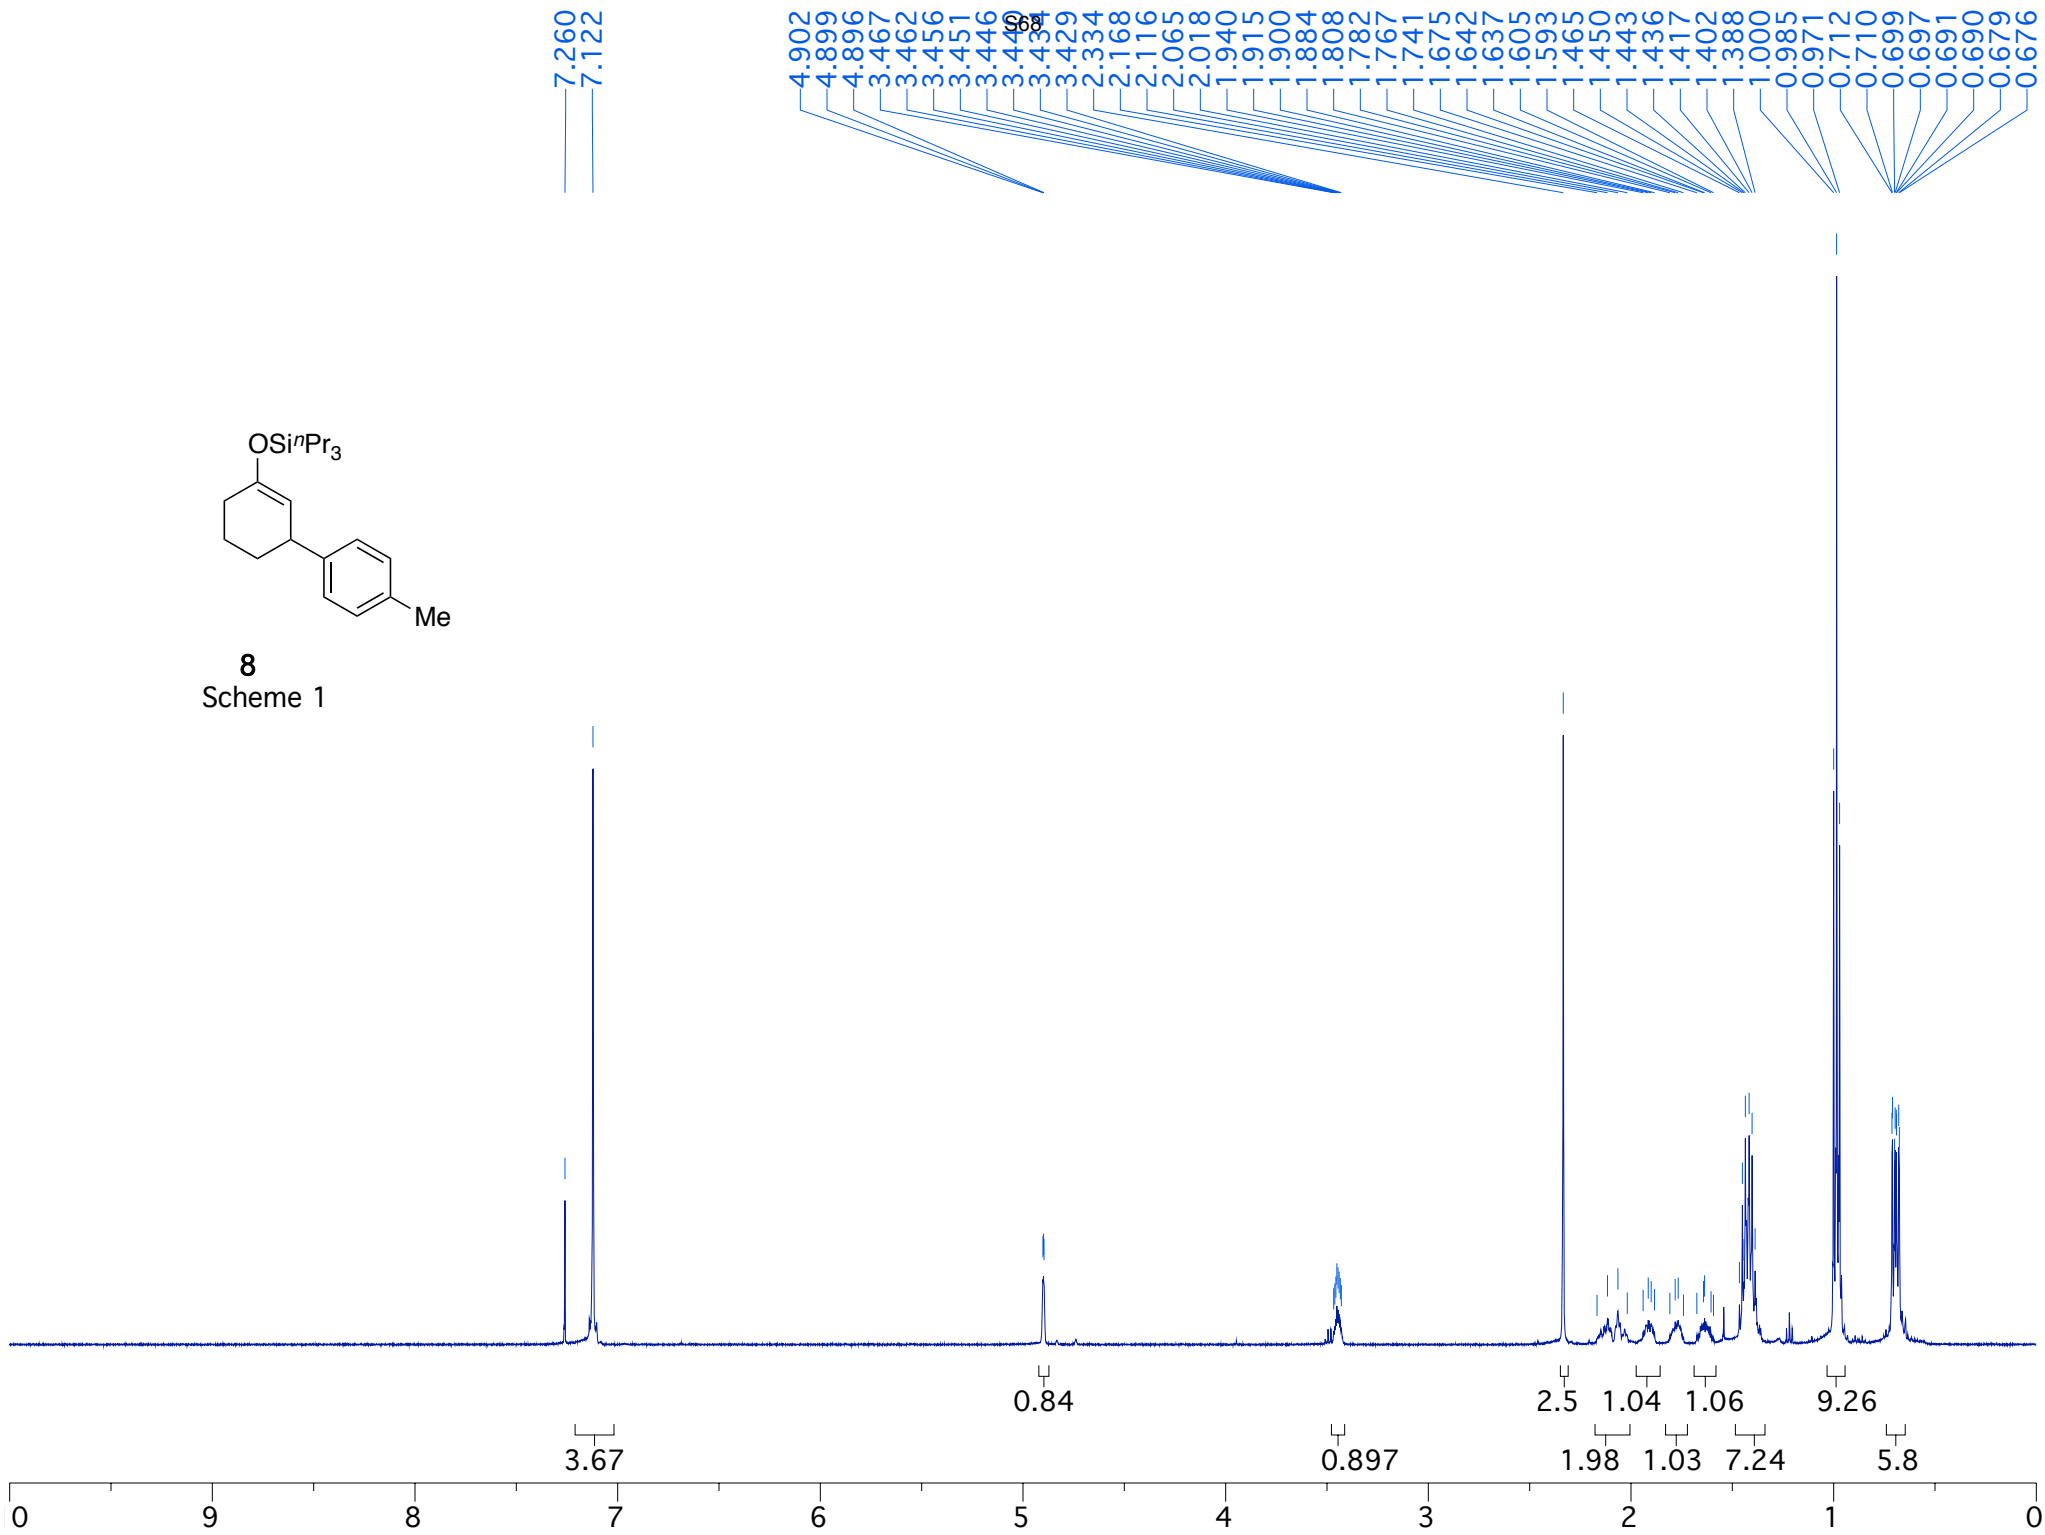

S69

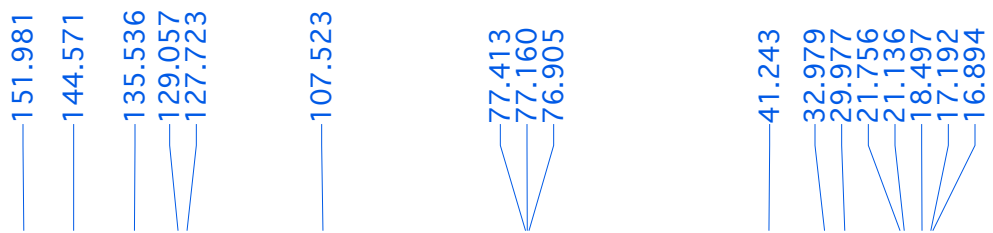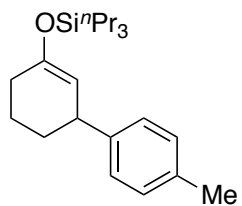

**8**  
Scheme 1

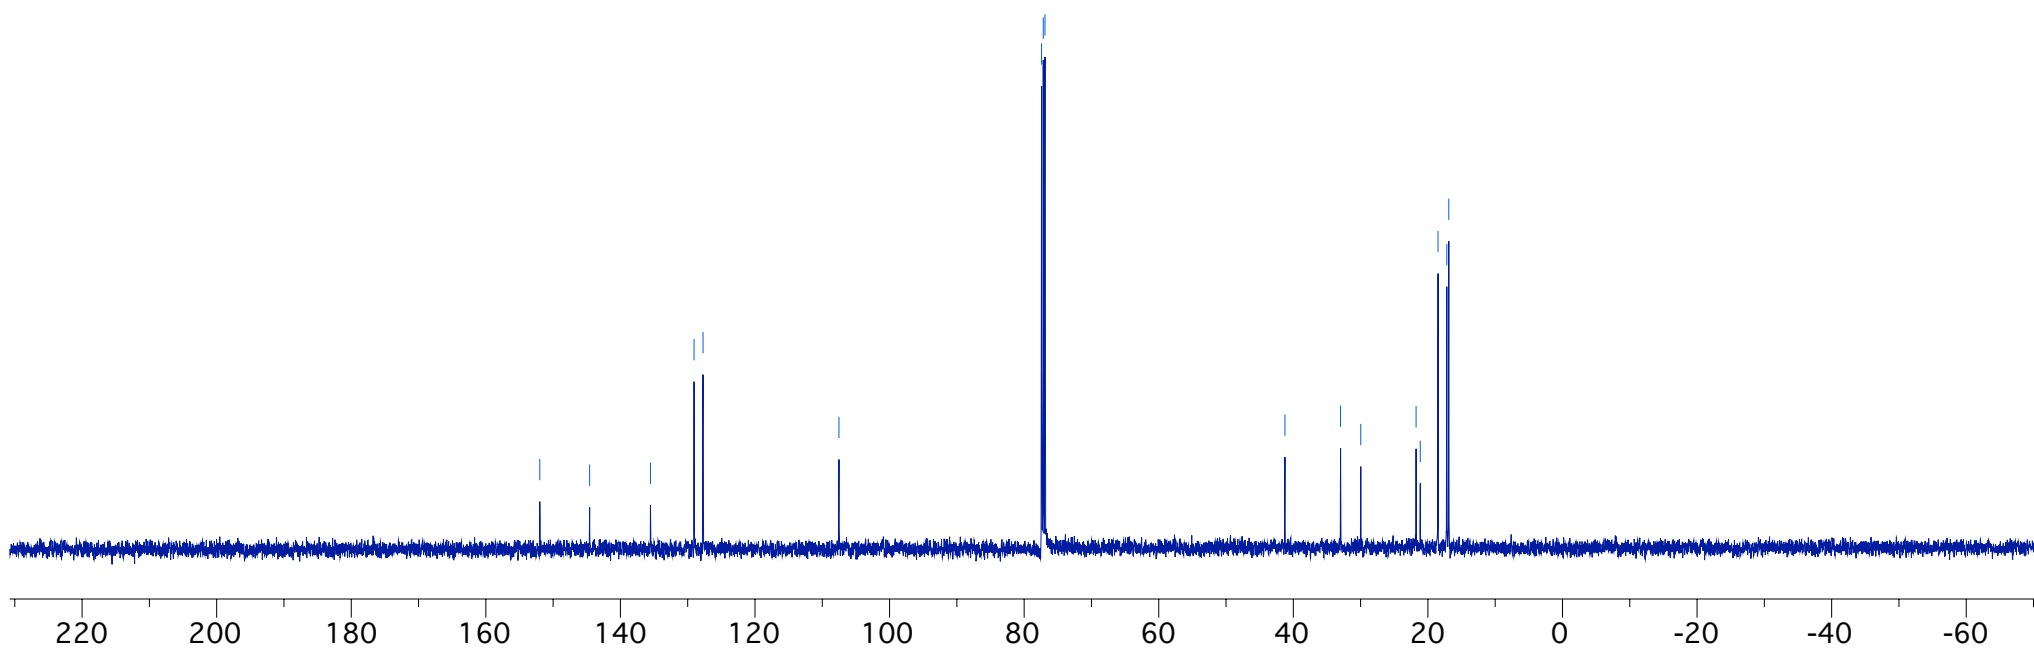

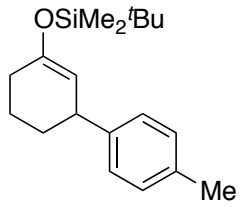

**9**  
Scheme 1

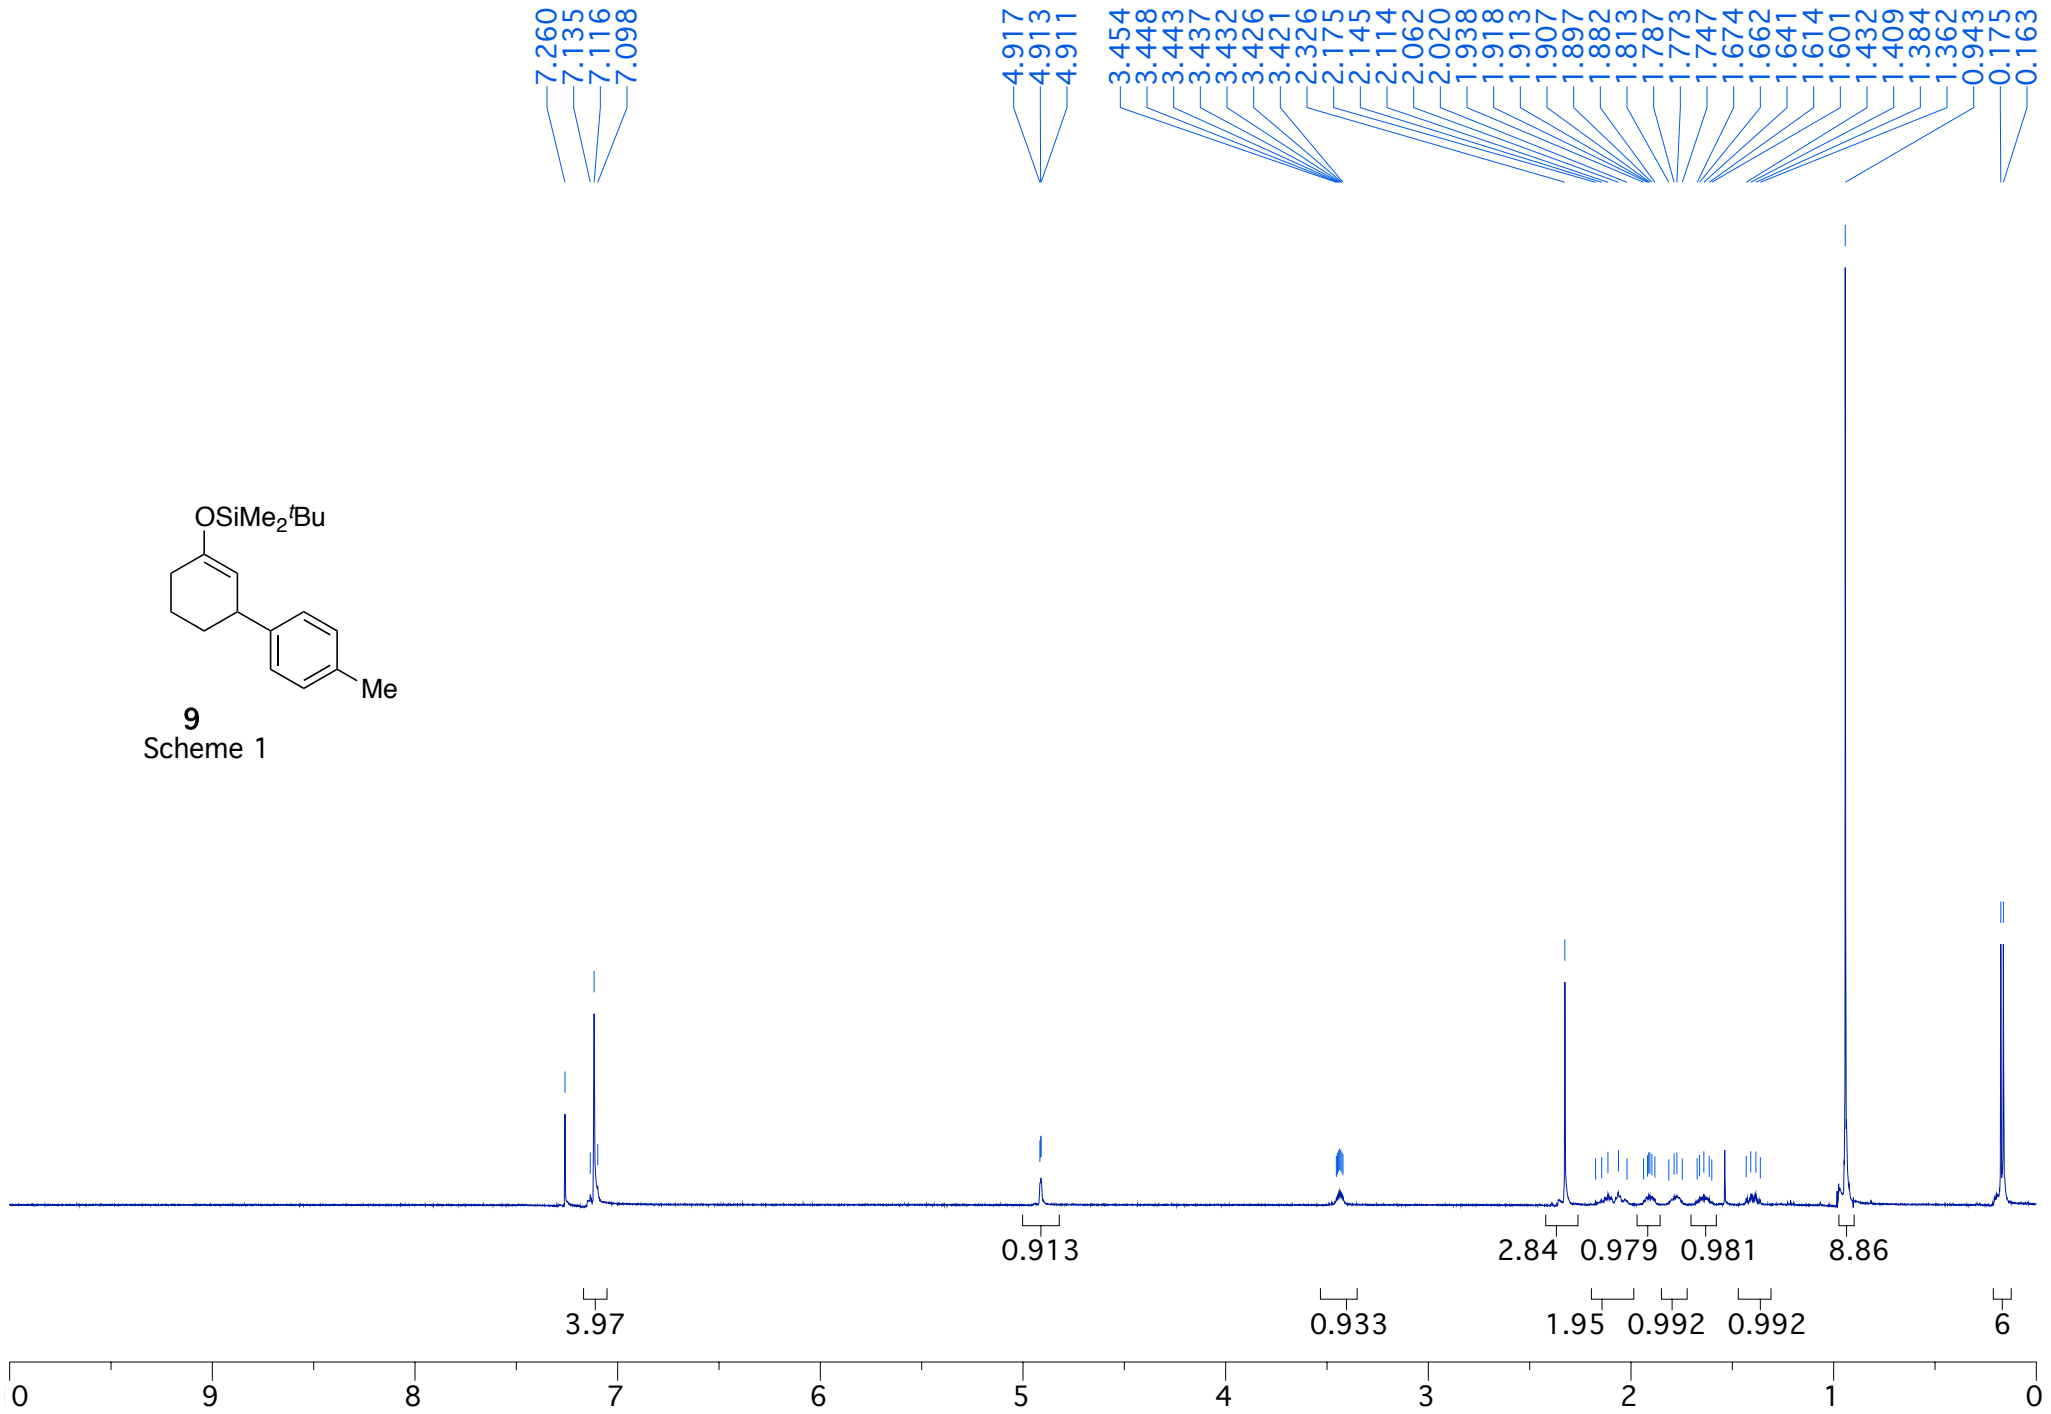

S71

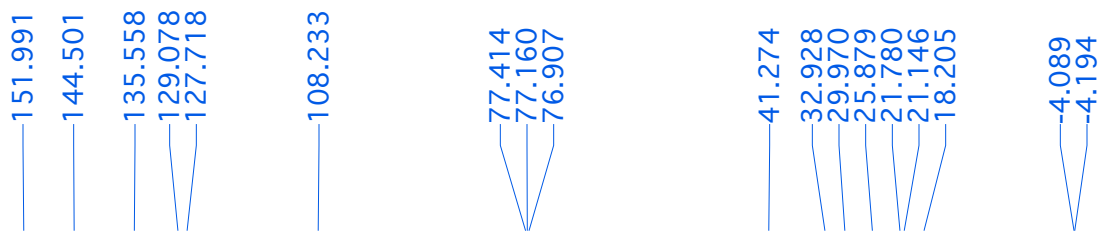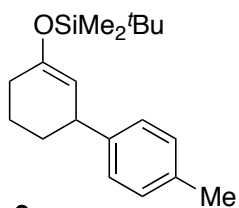

**9**  
Scheme 1

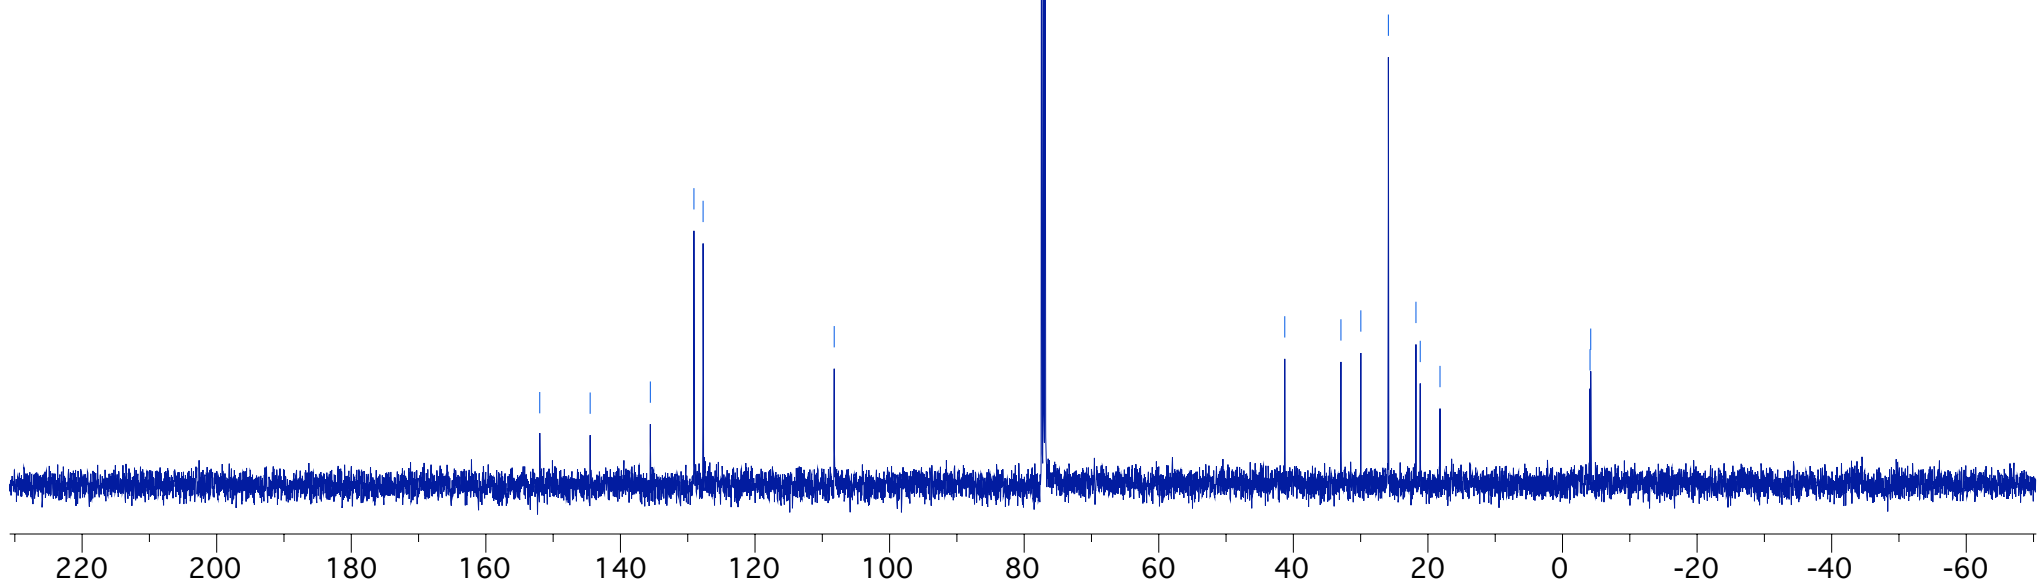

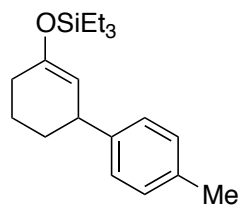

10

Scheme 2

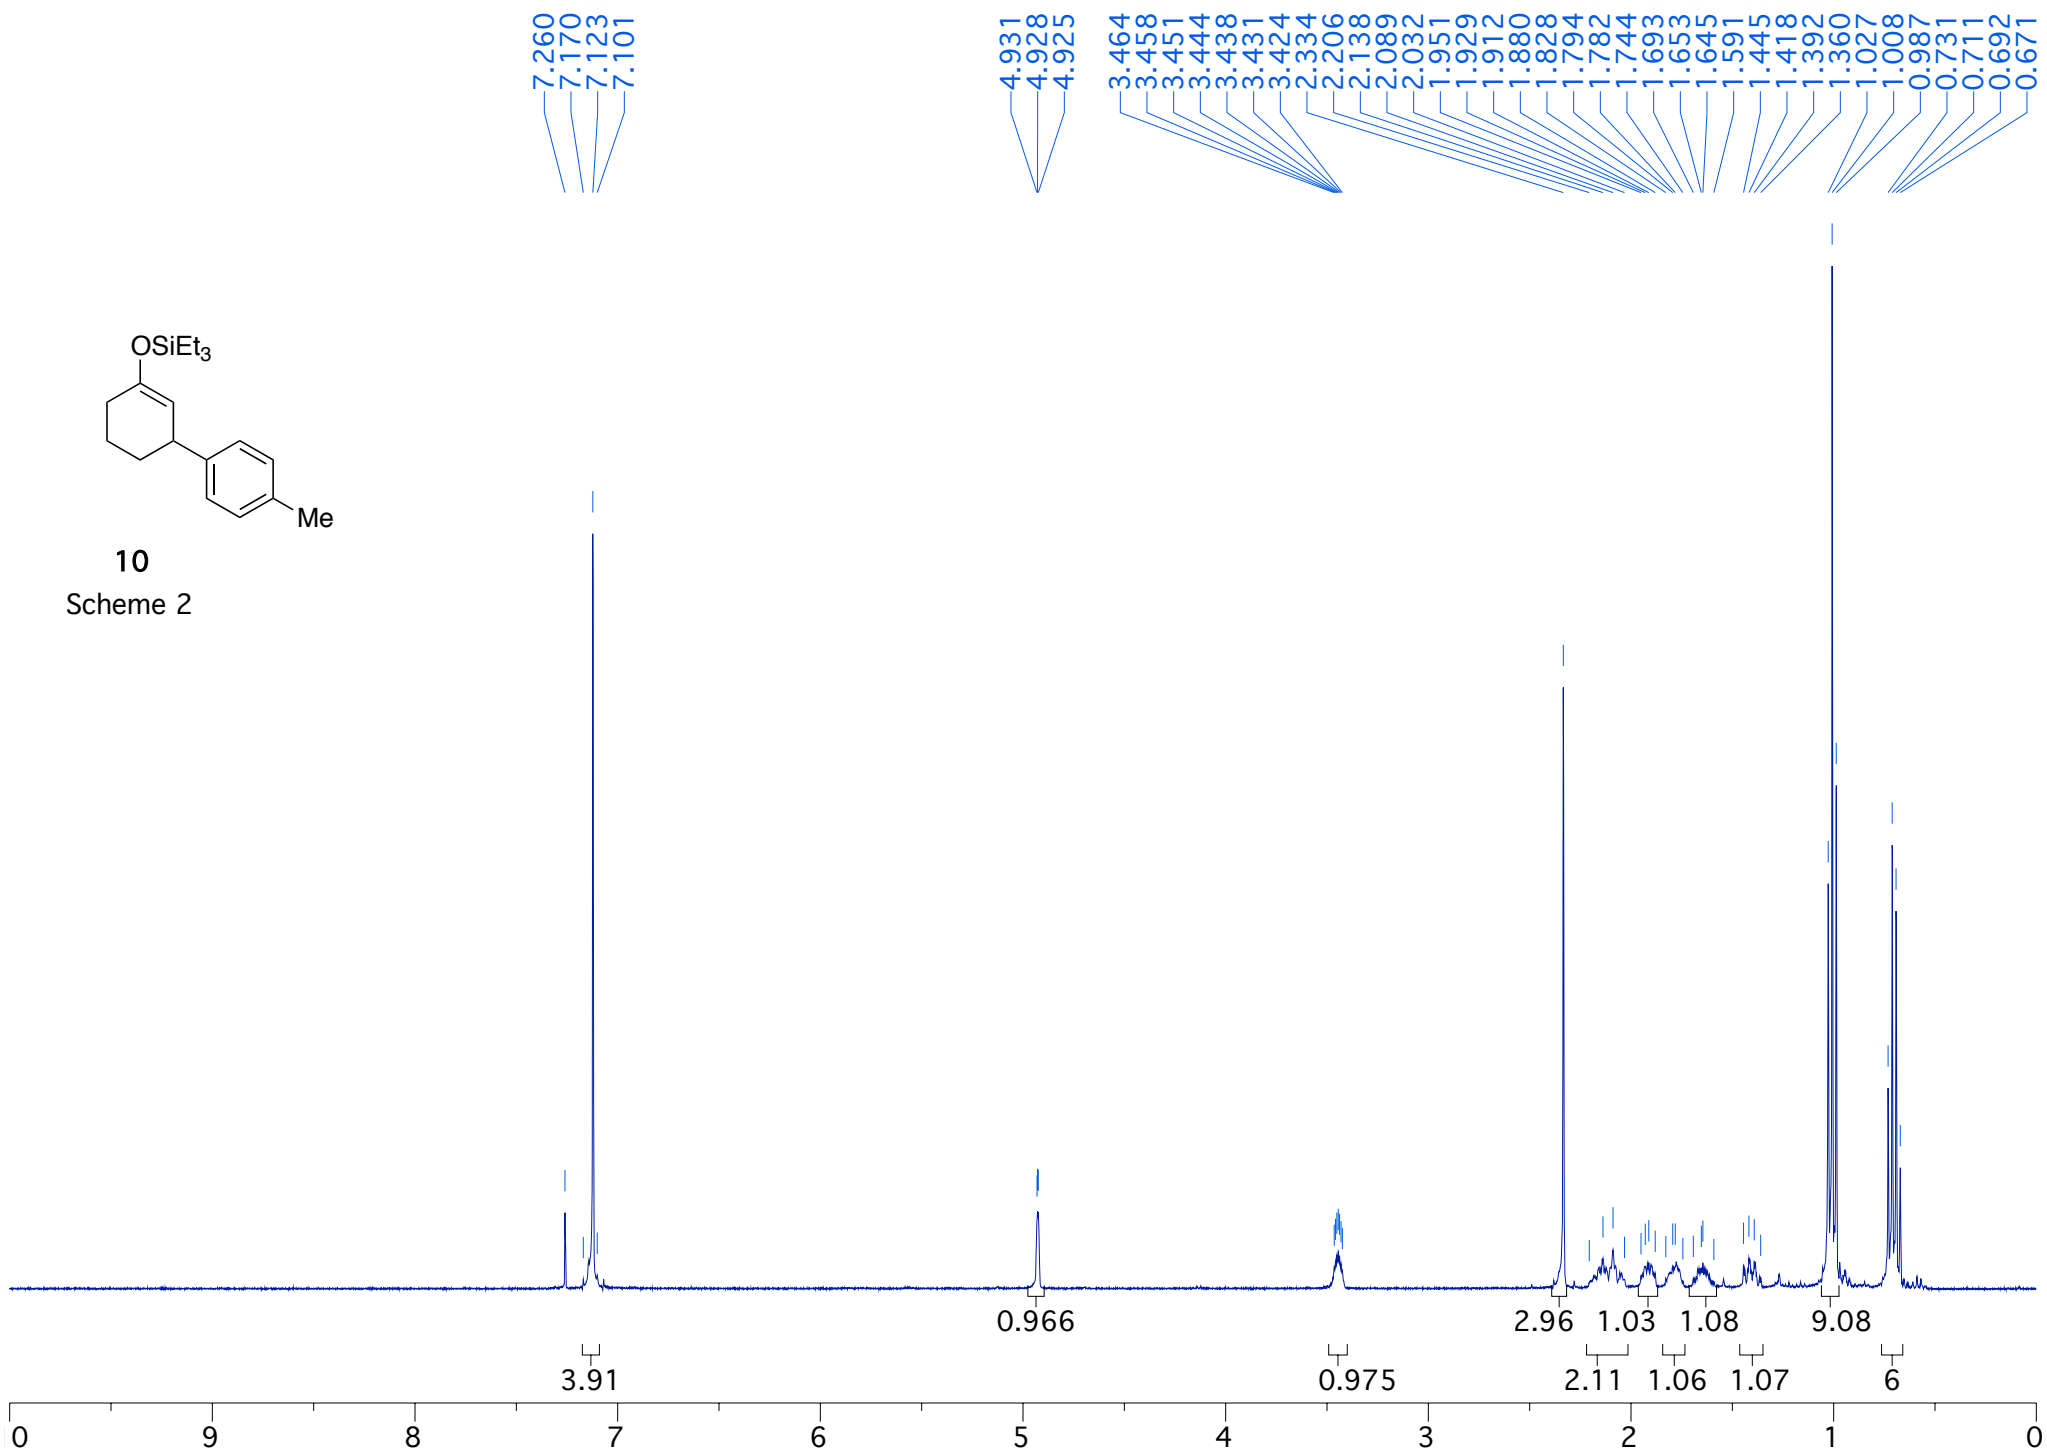

S73

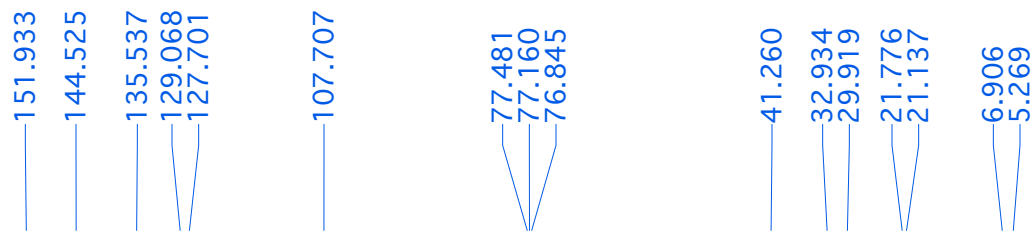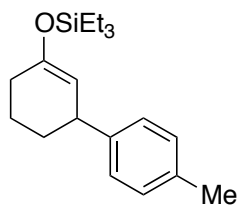

10  
Scheme 2

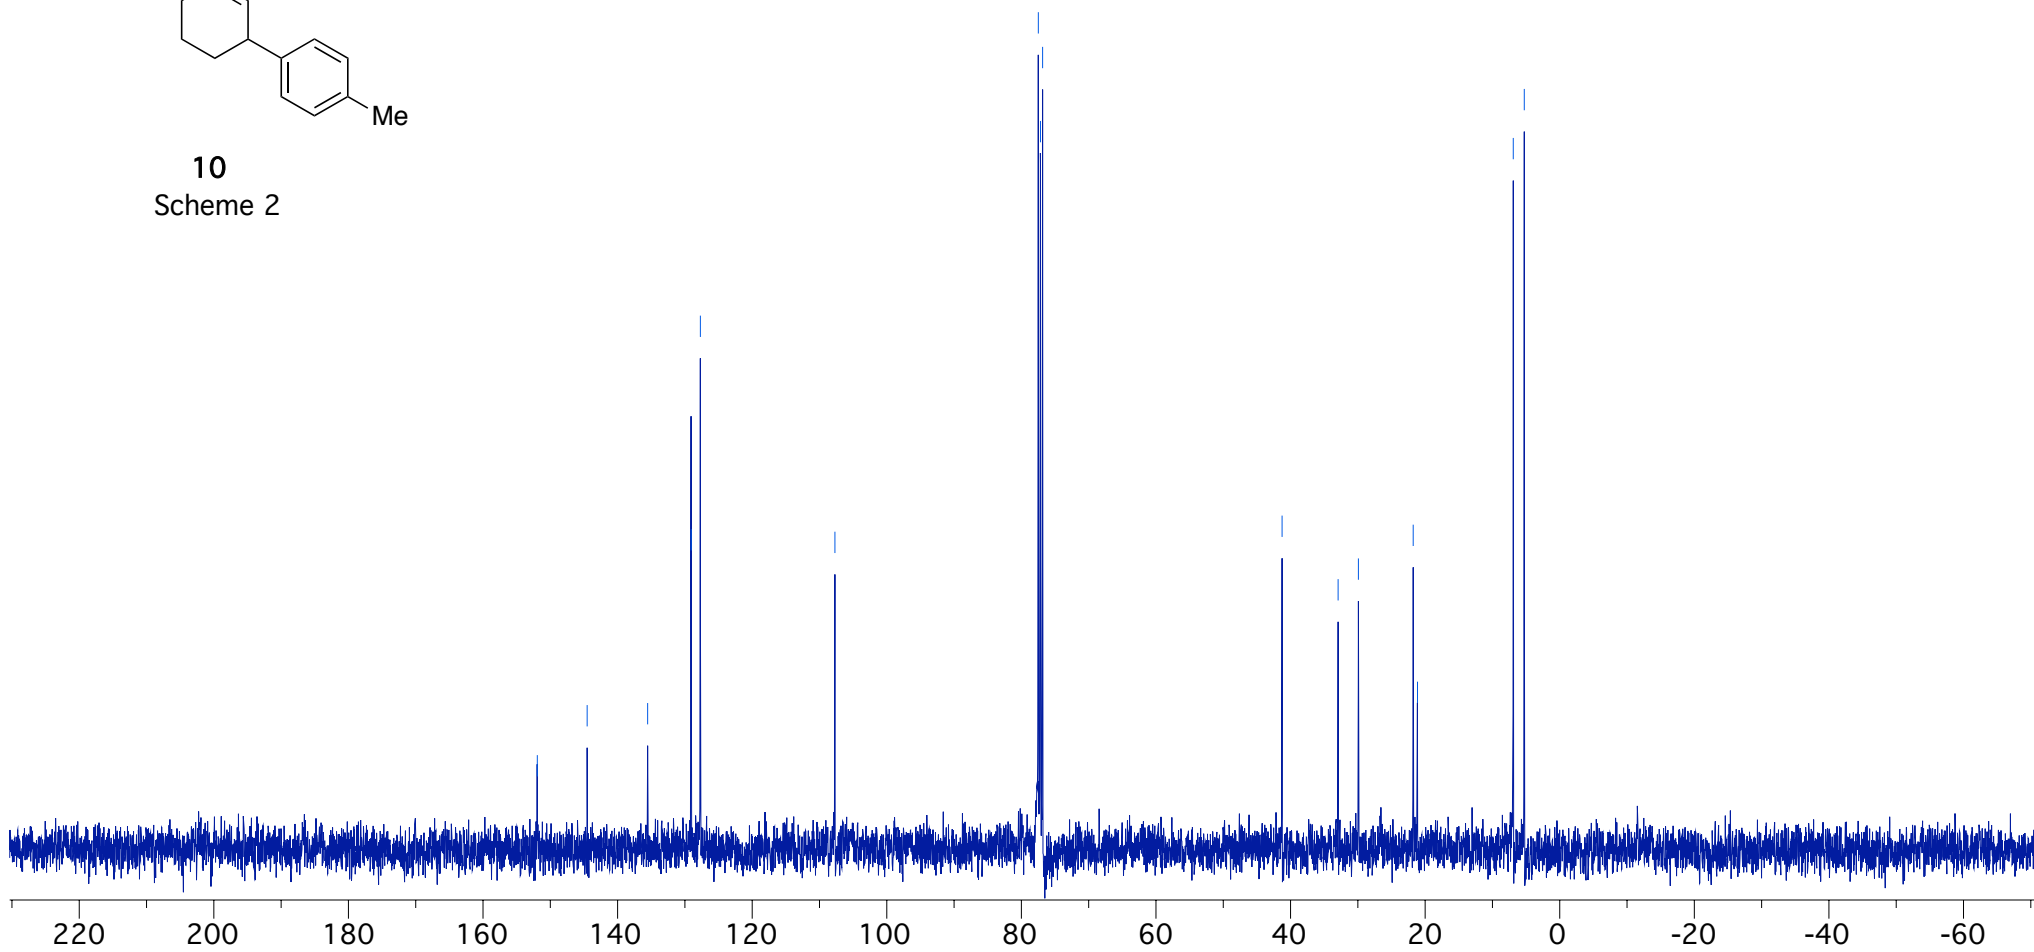

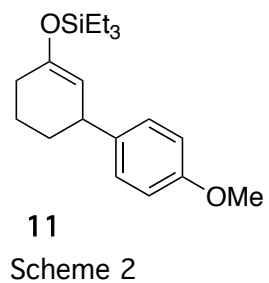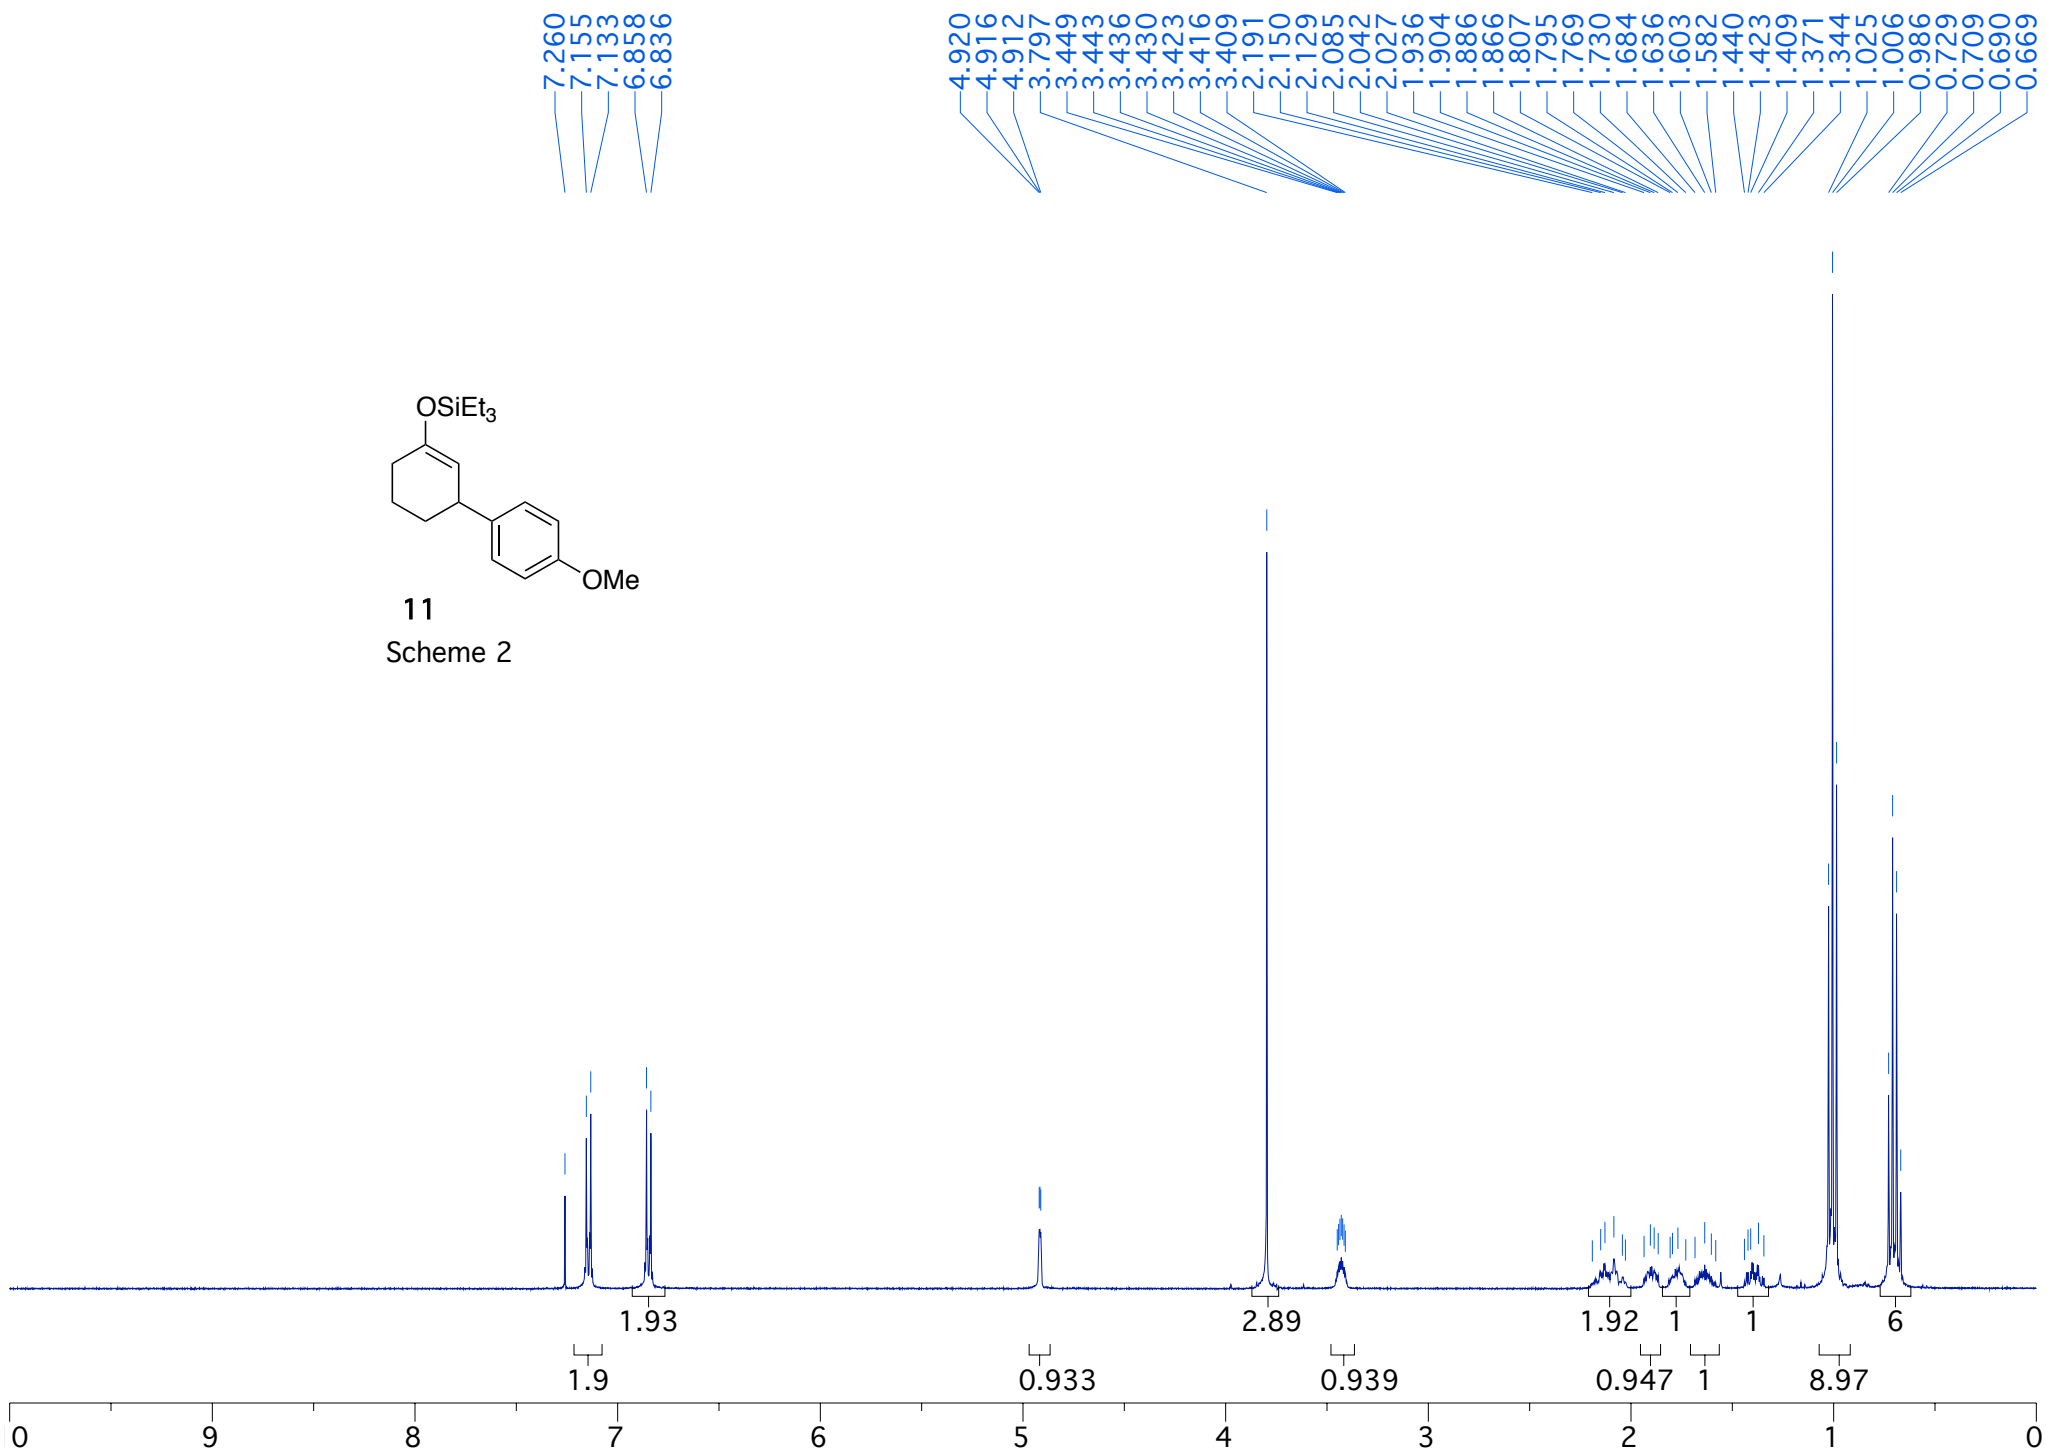



S75

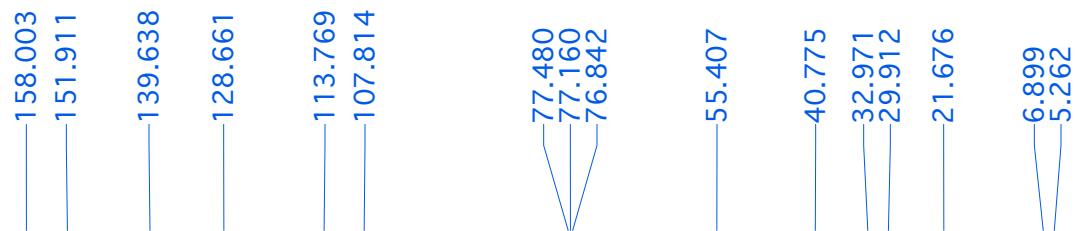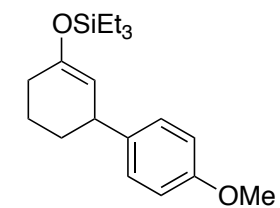

11  
Scheme 2

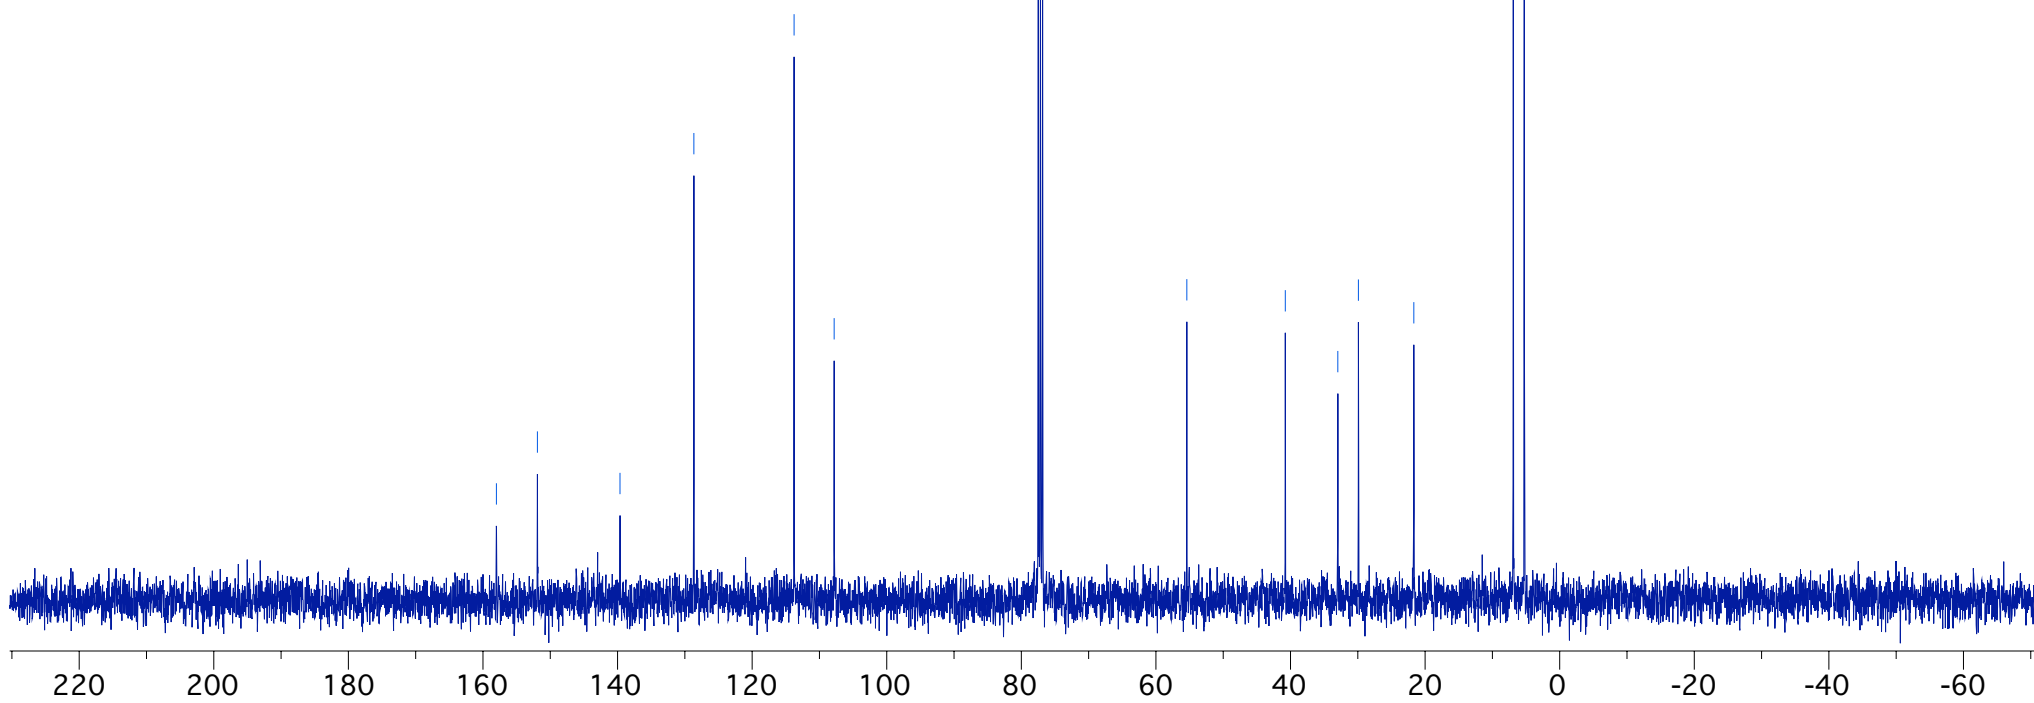

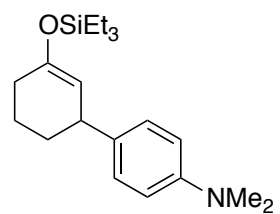

**12**  
Scheme 2

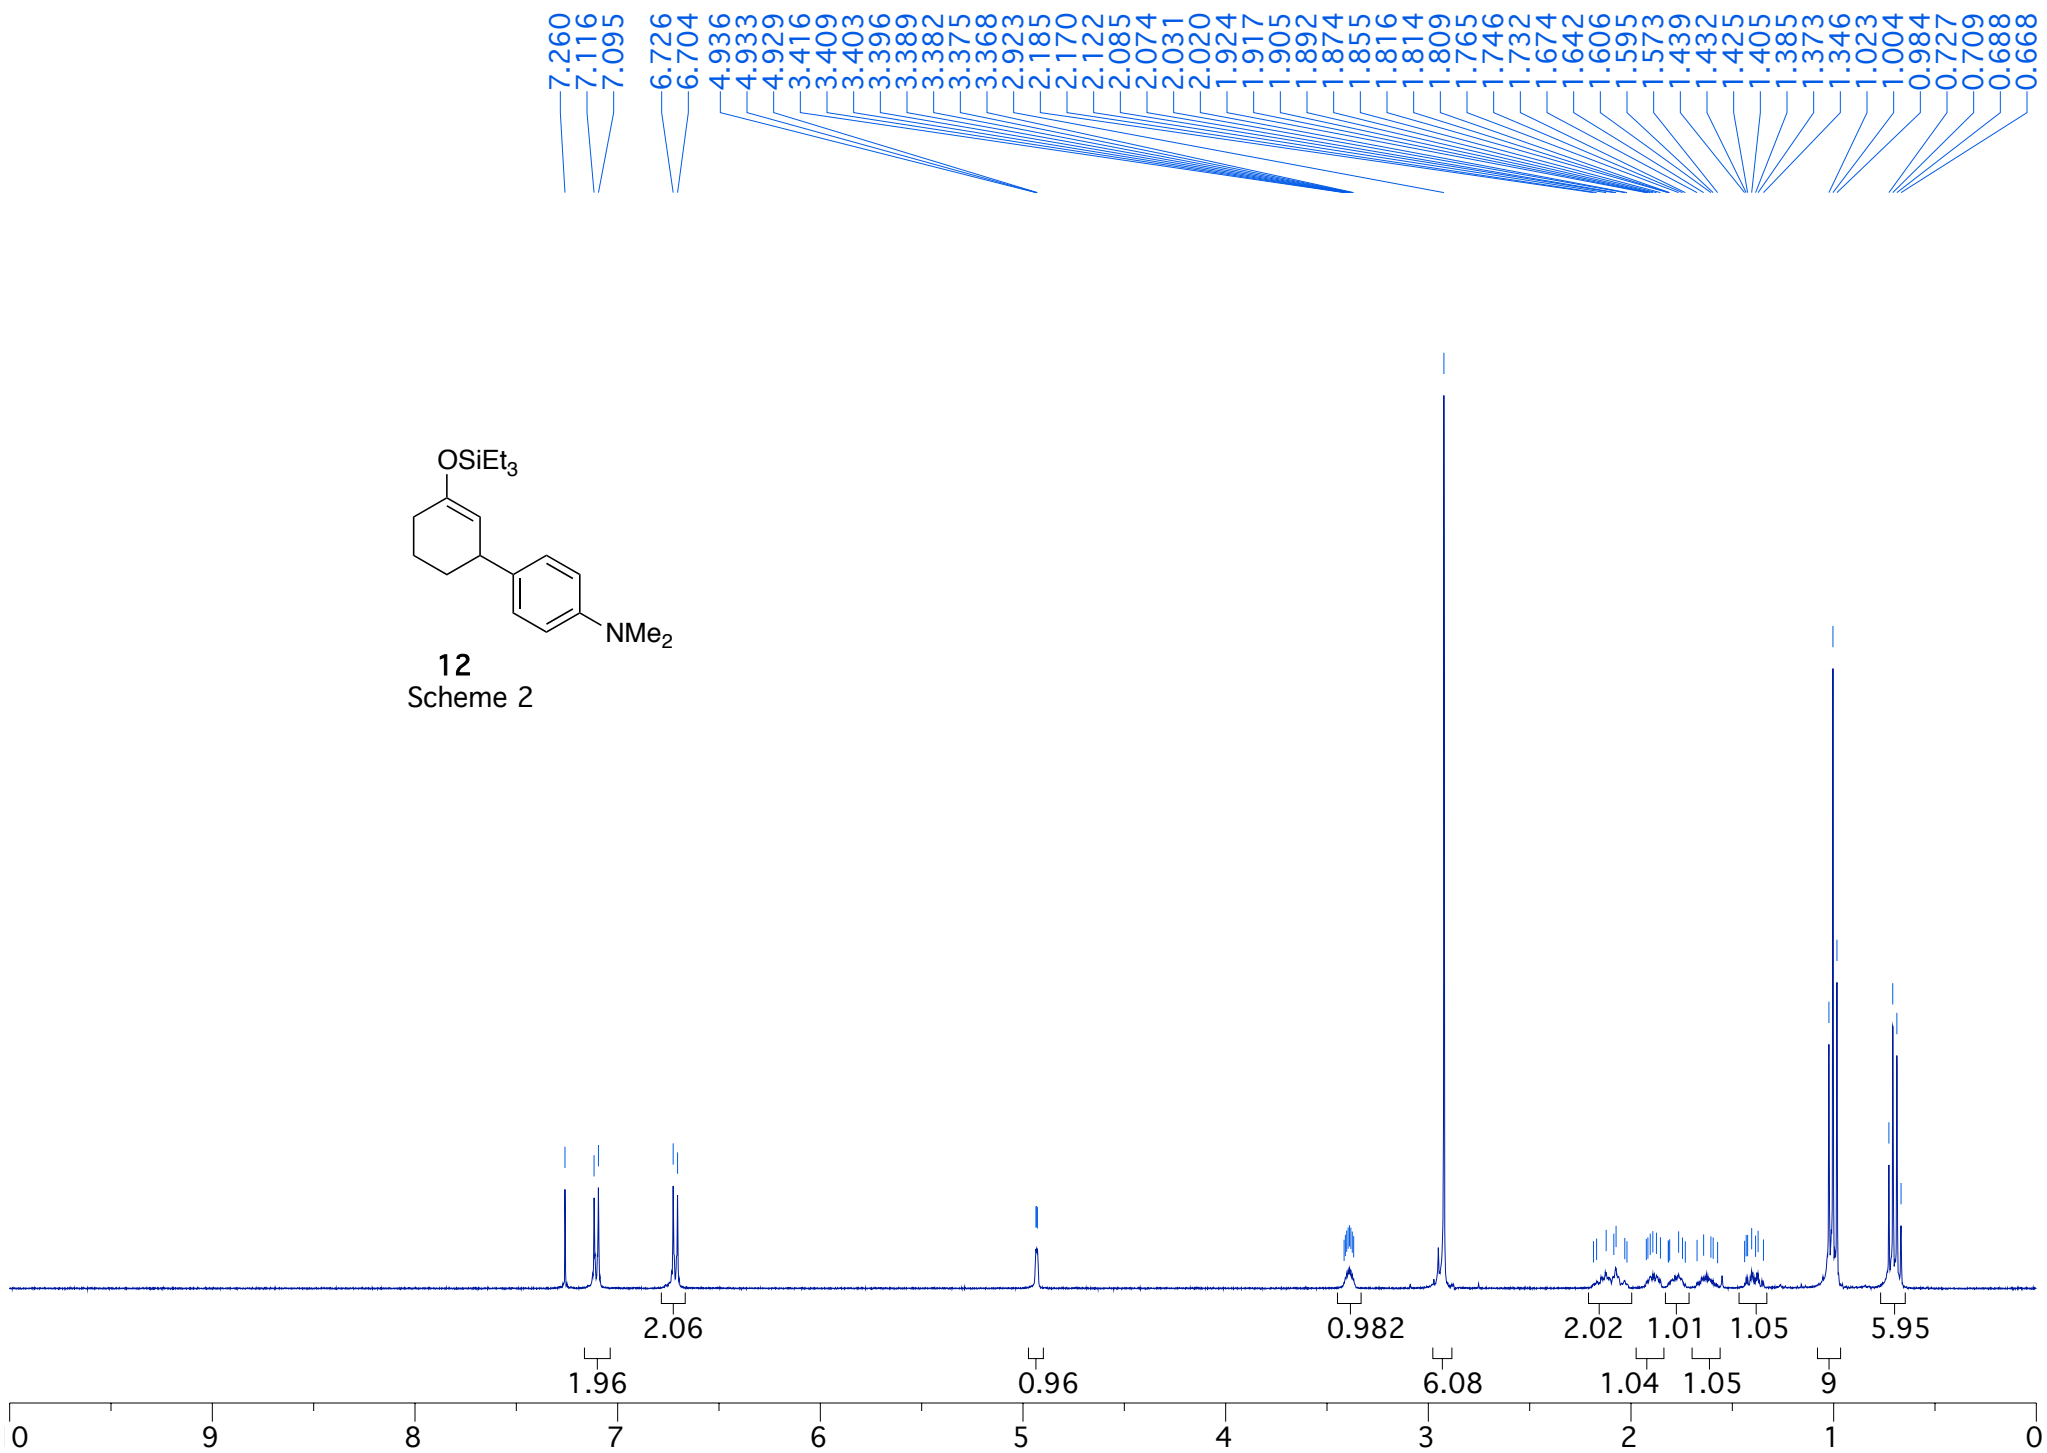

S77

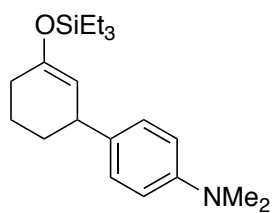

**12**  
Scheme 2

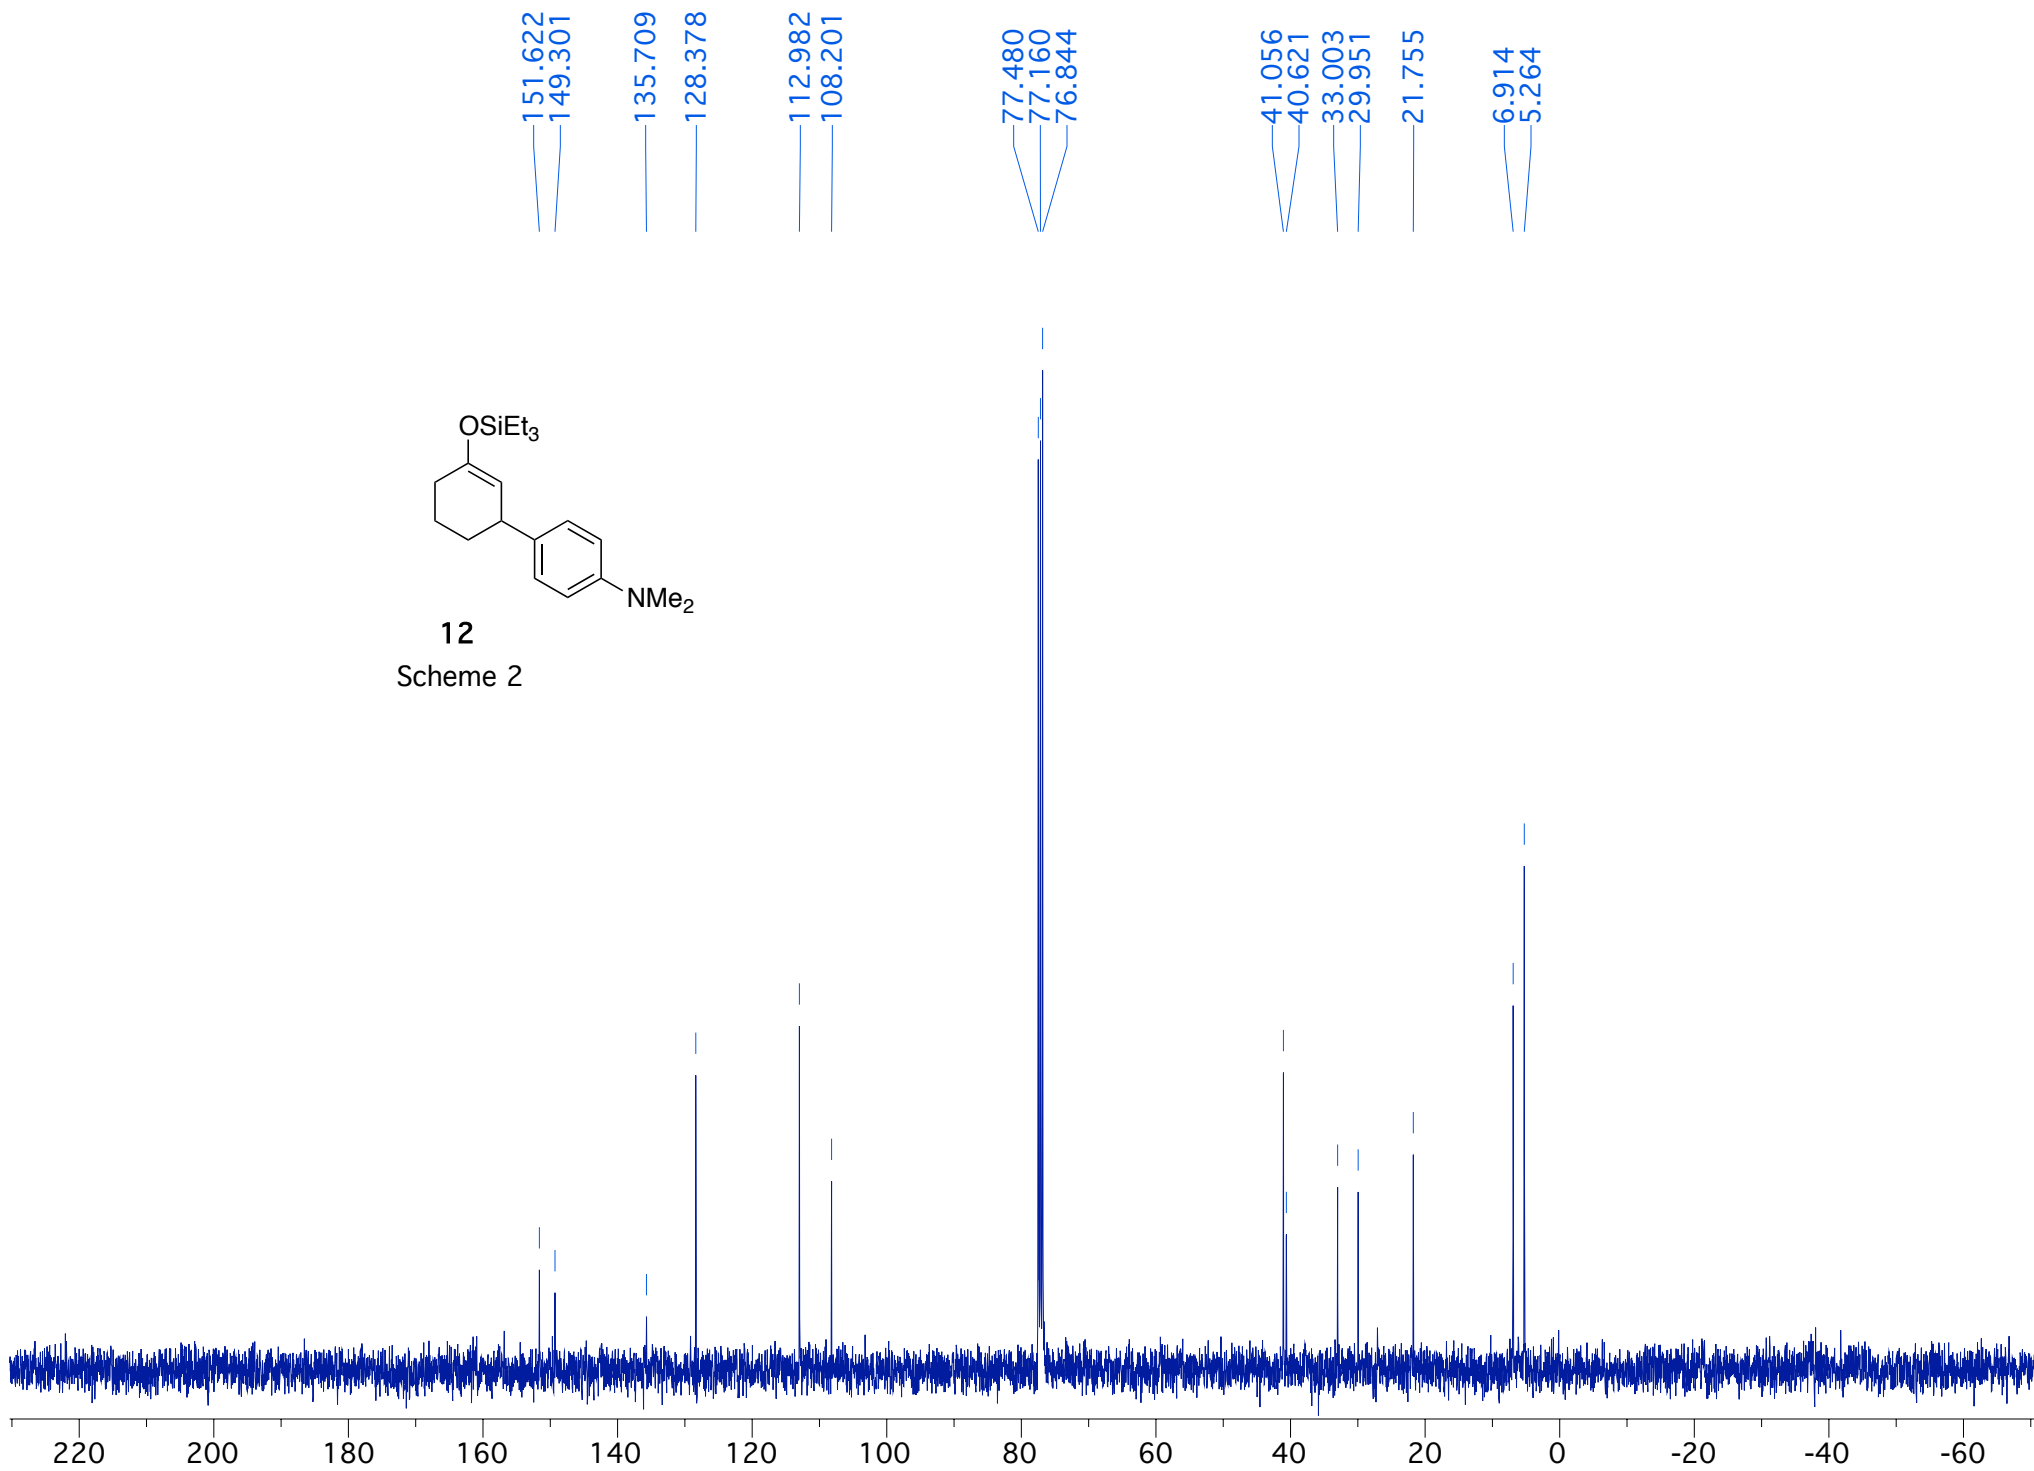

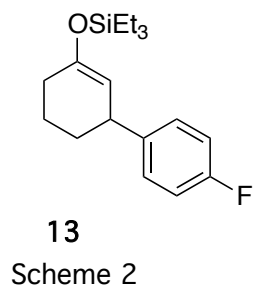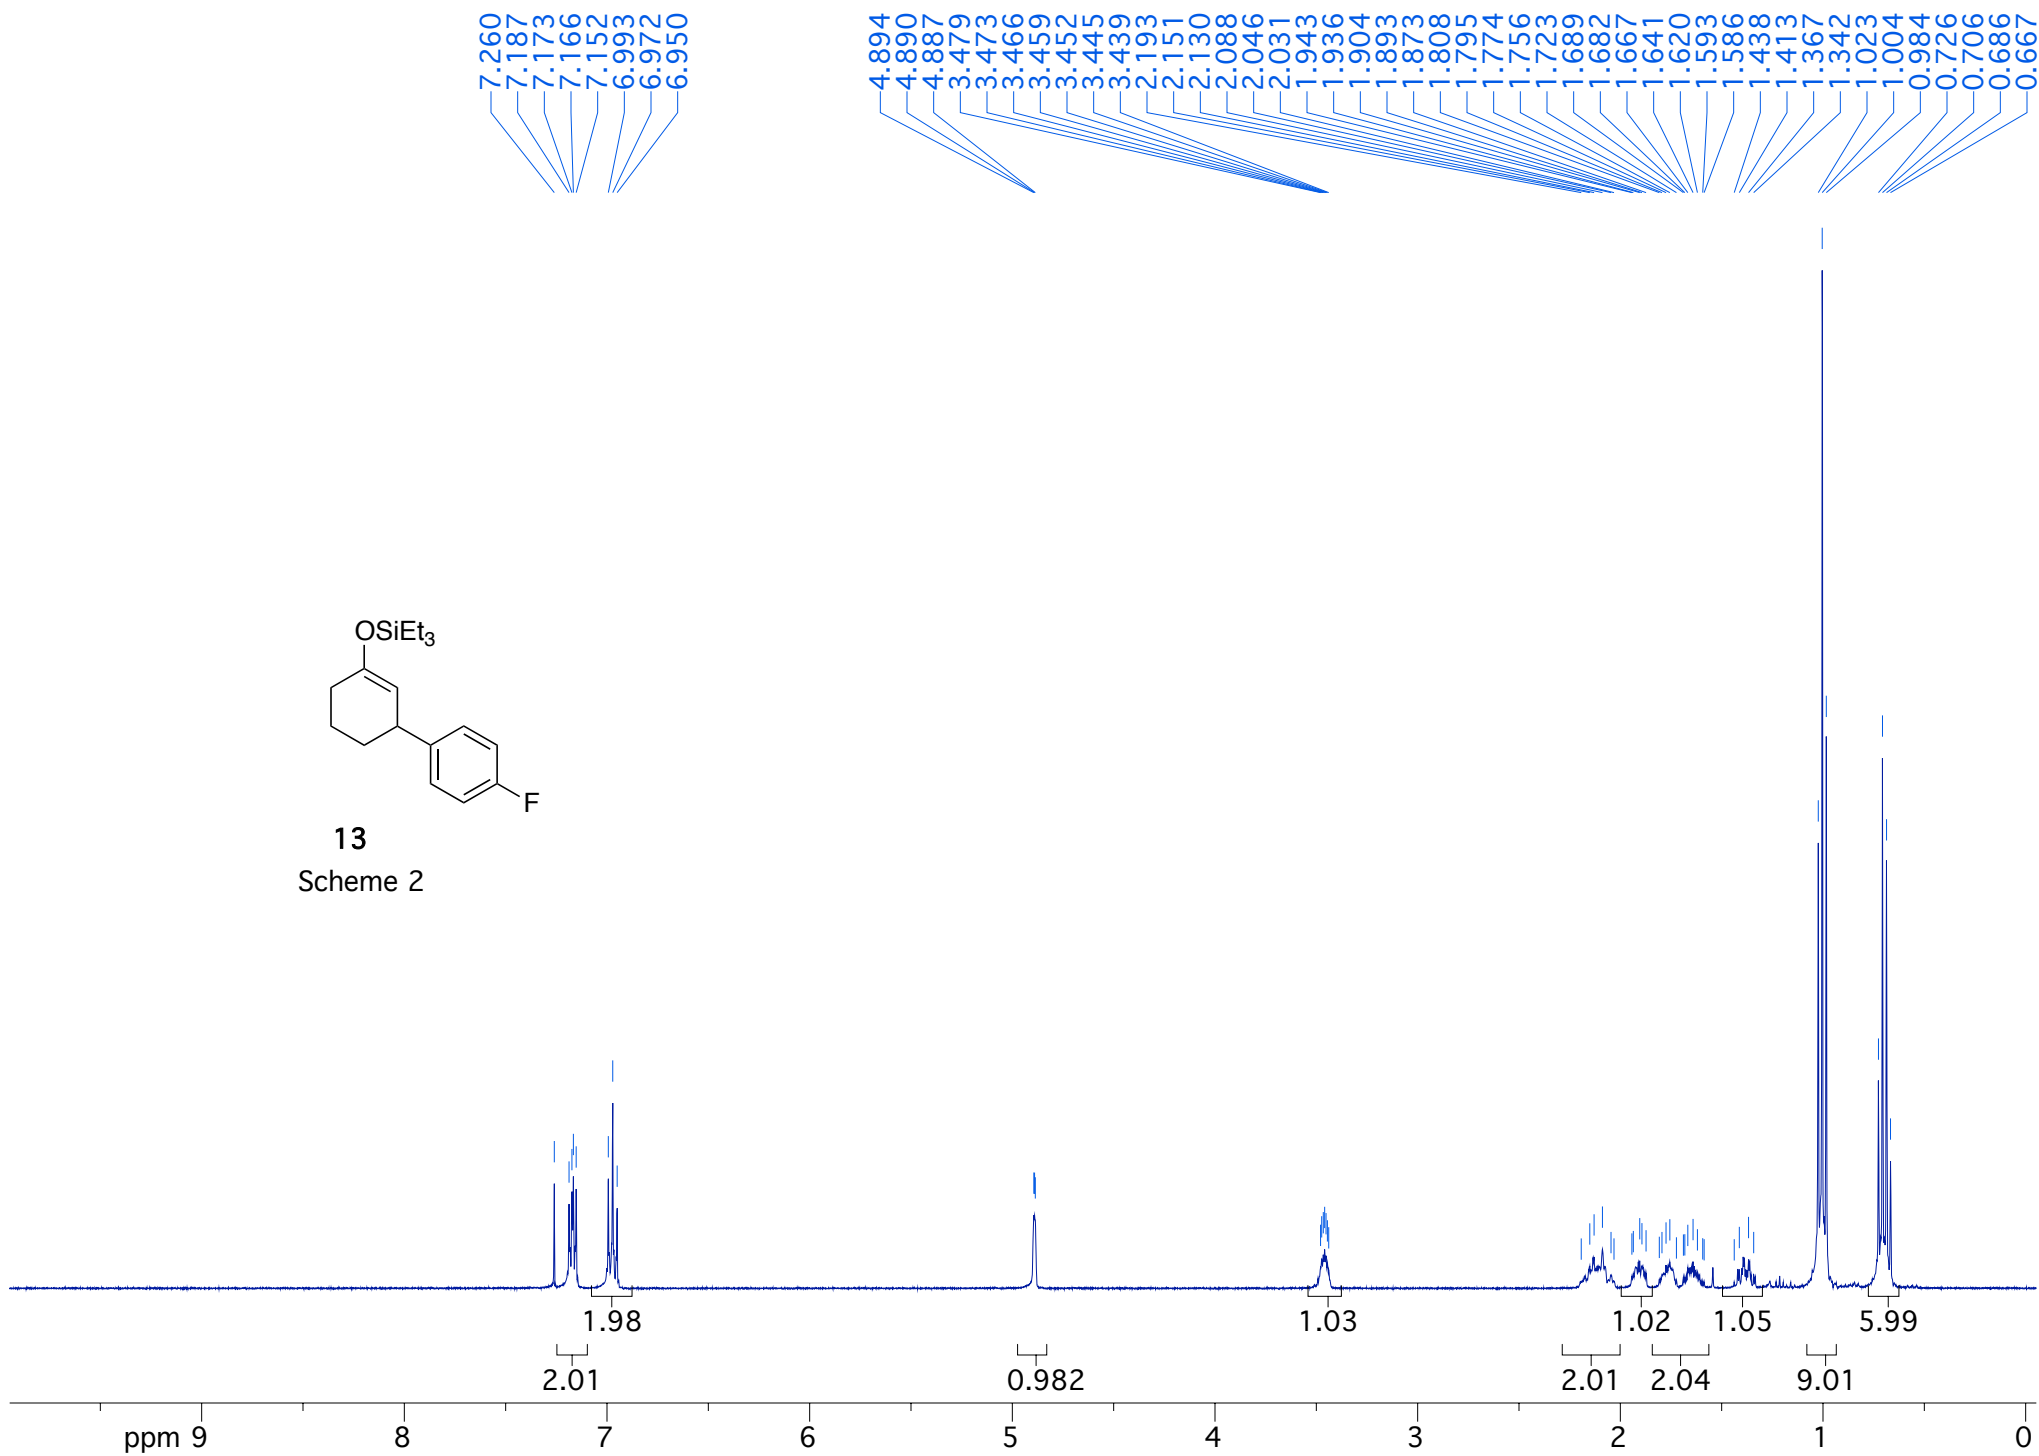

S79

162.648  
160.233  
152.279  
143.102  
129.110  
129.033  
115.140  
114.933  
107.305  
77.476  
77.160  
76.845  
40.910  
32.903  
29.875  
21.591  
6.885  
5.271

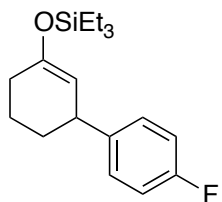

**13**  
Scheme 2

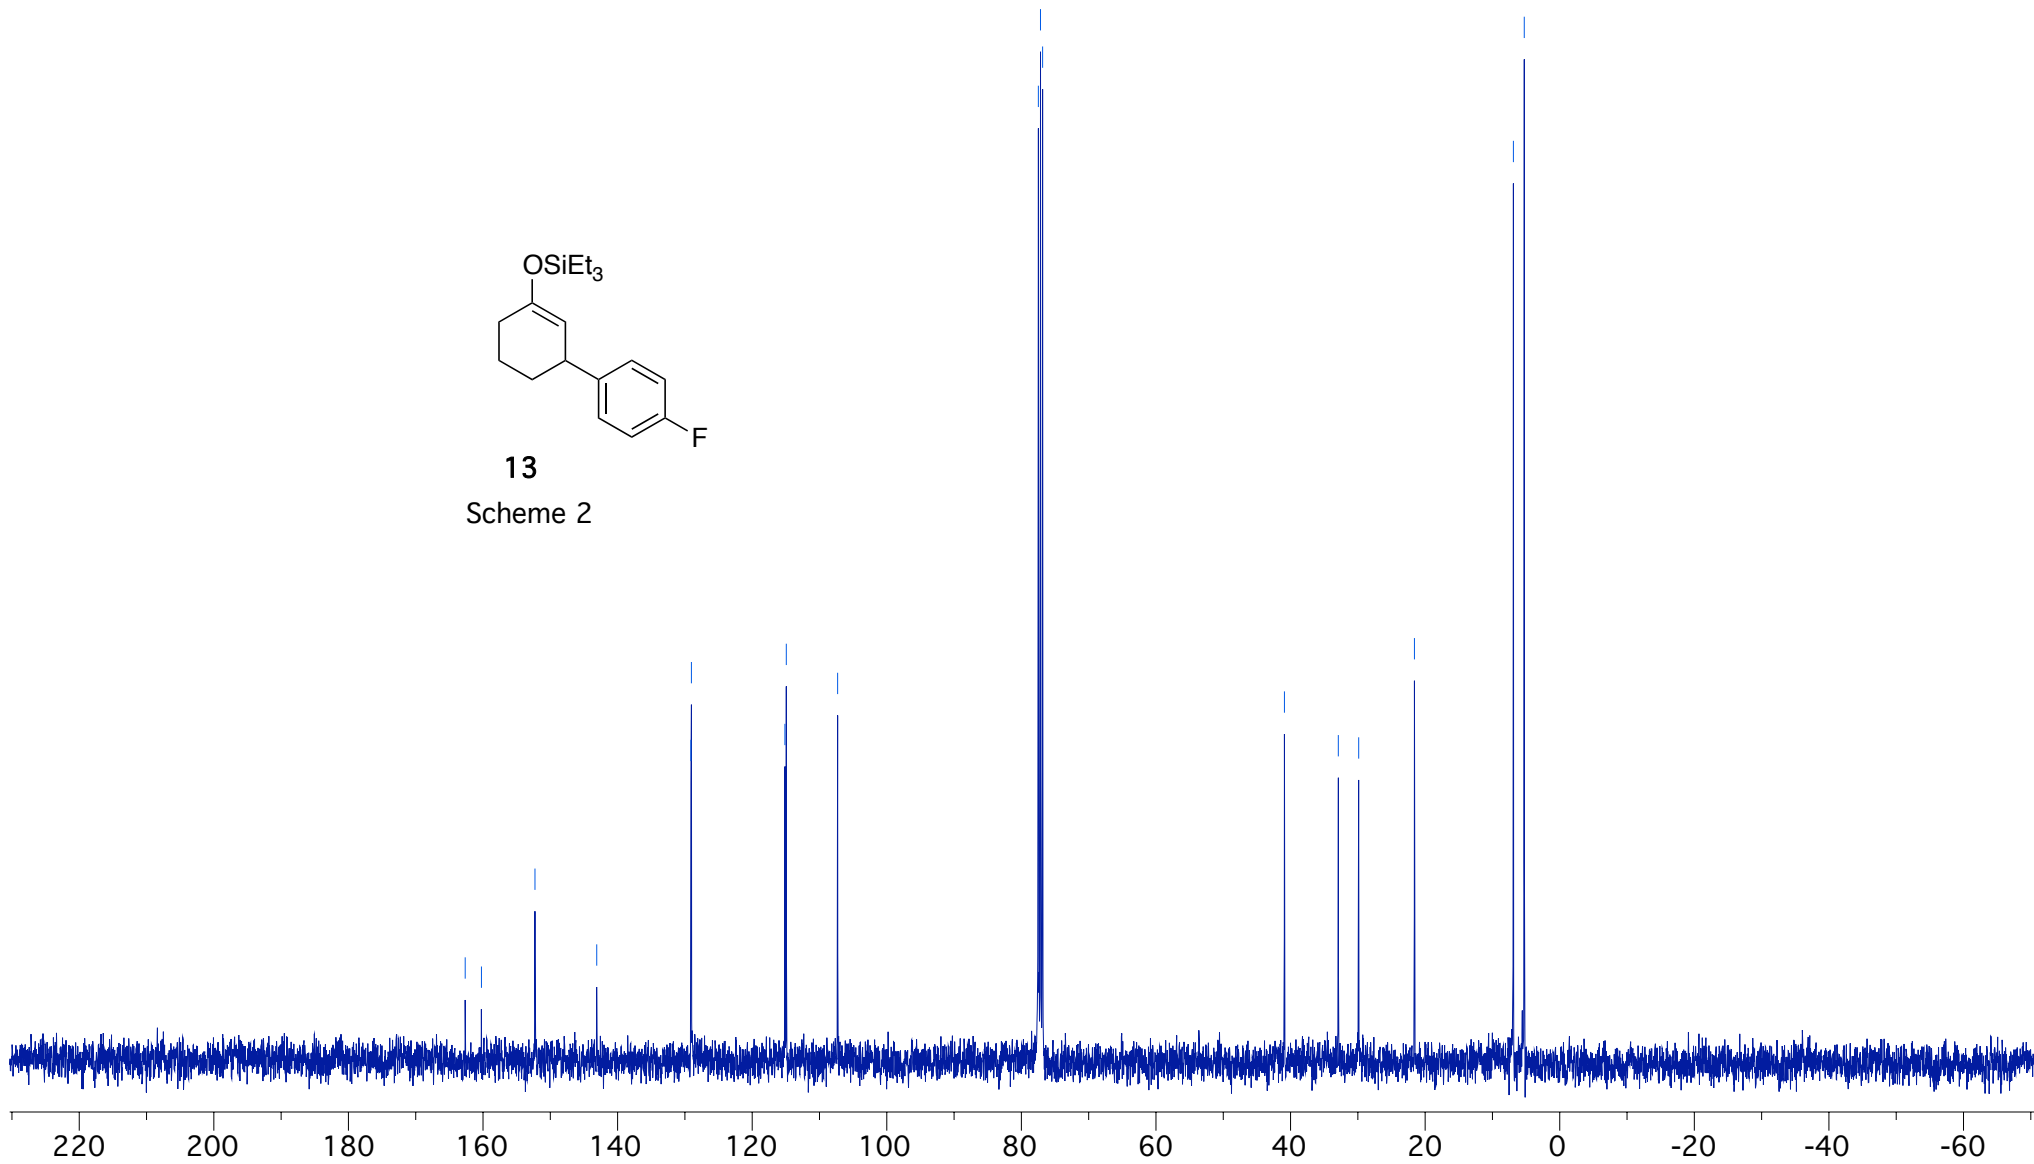

S80

66.729

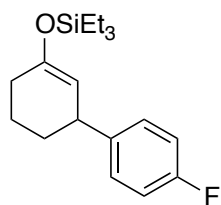

13

Scheme 2

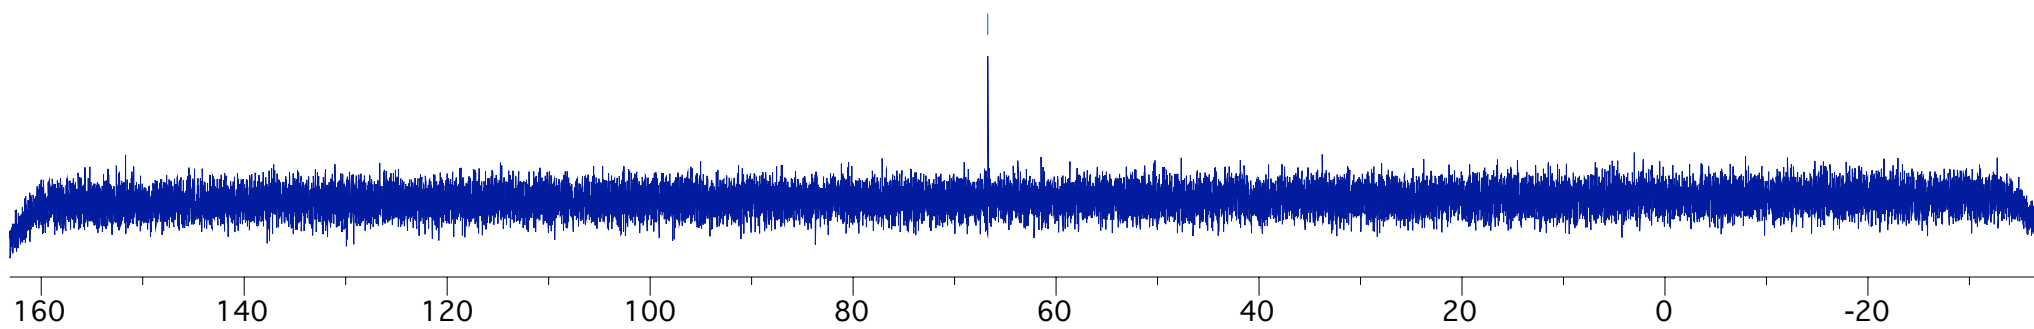

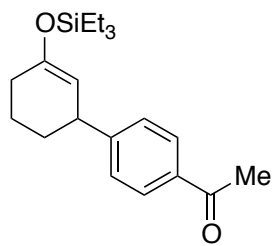

**14**  
Scheme 2

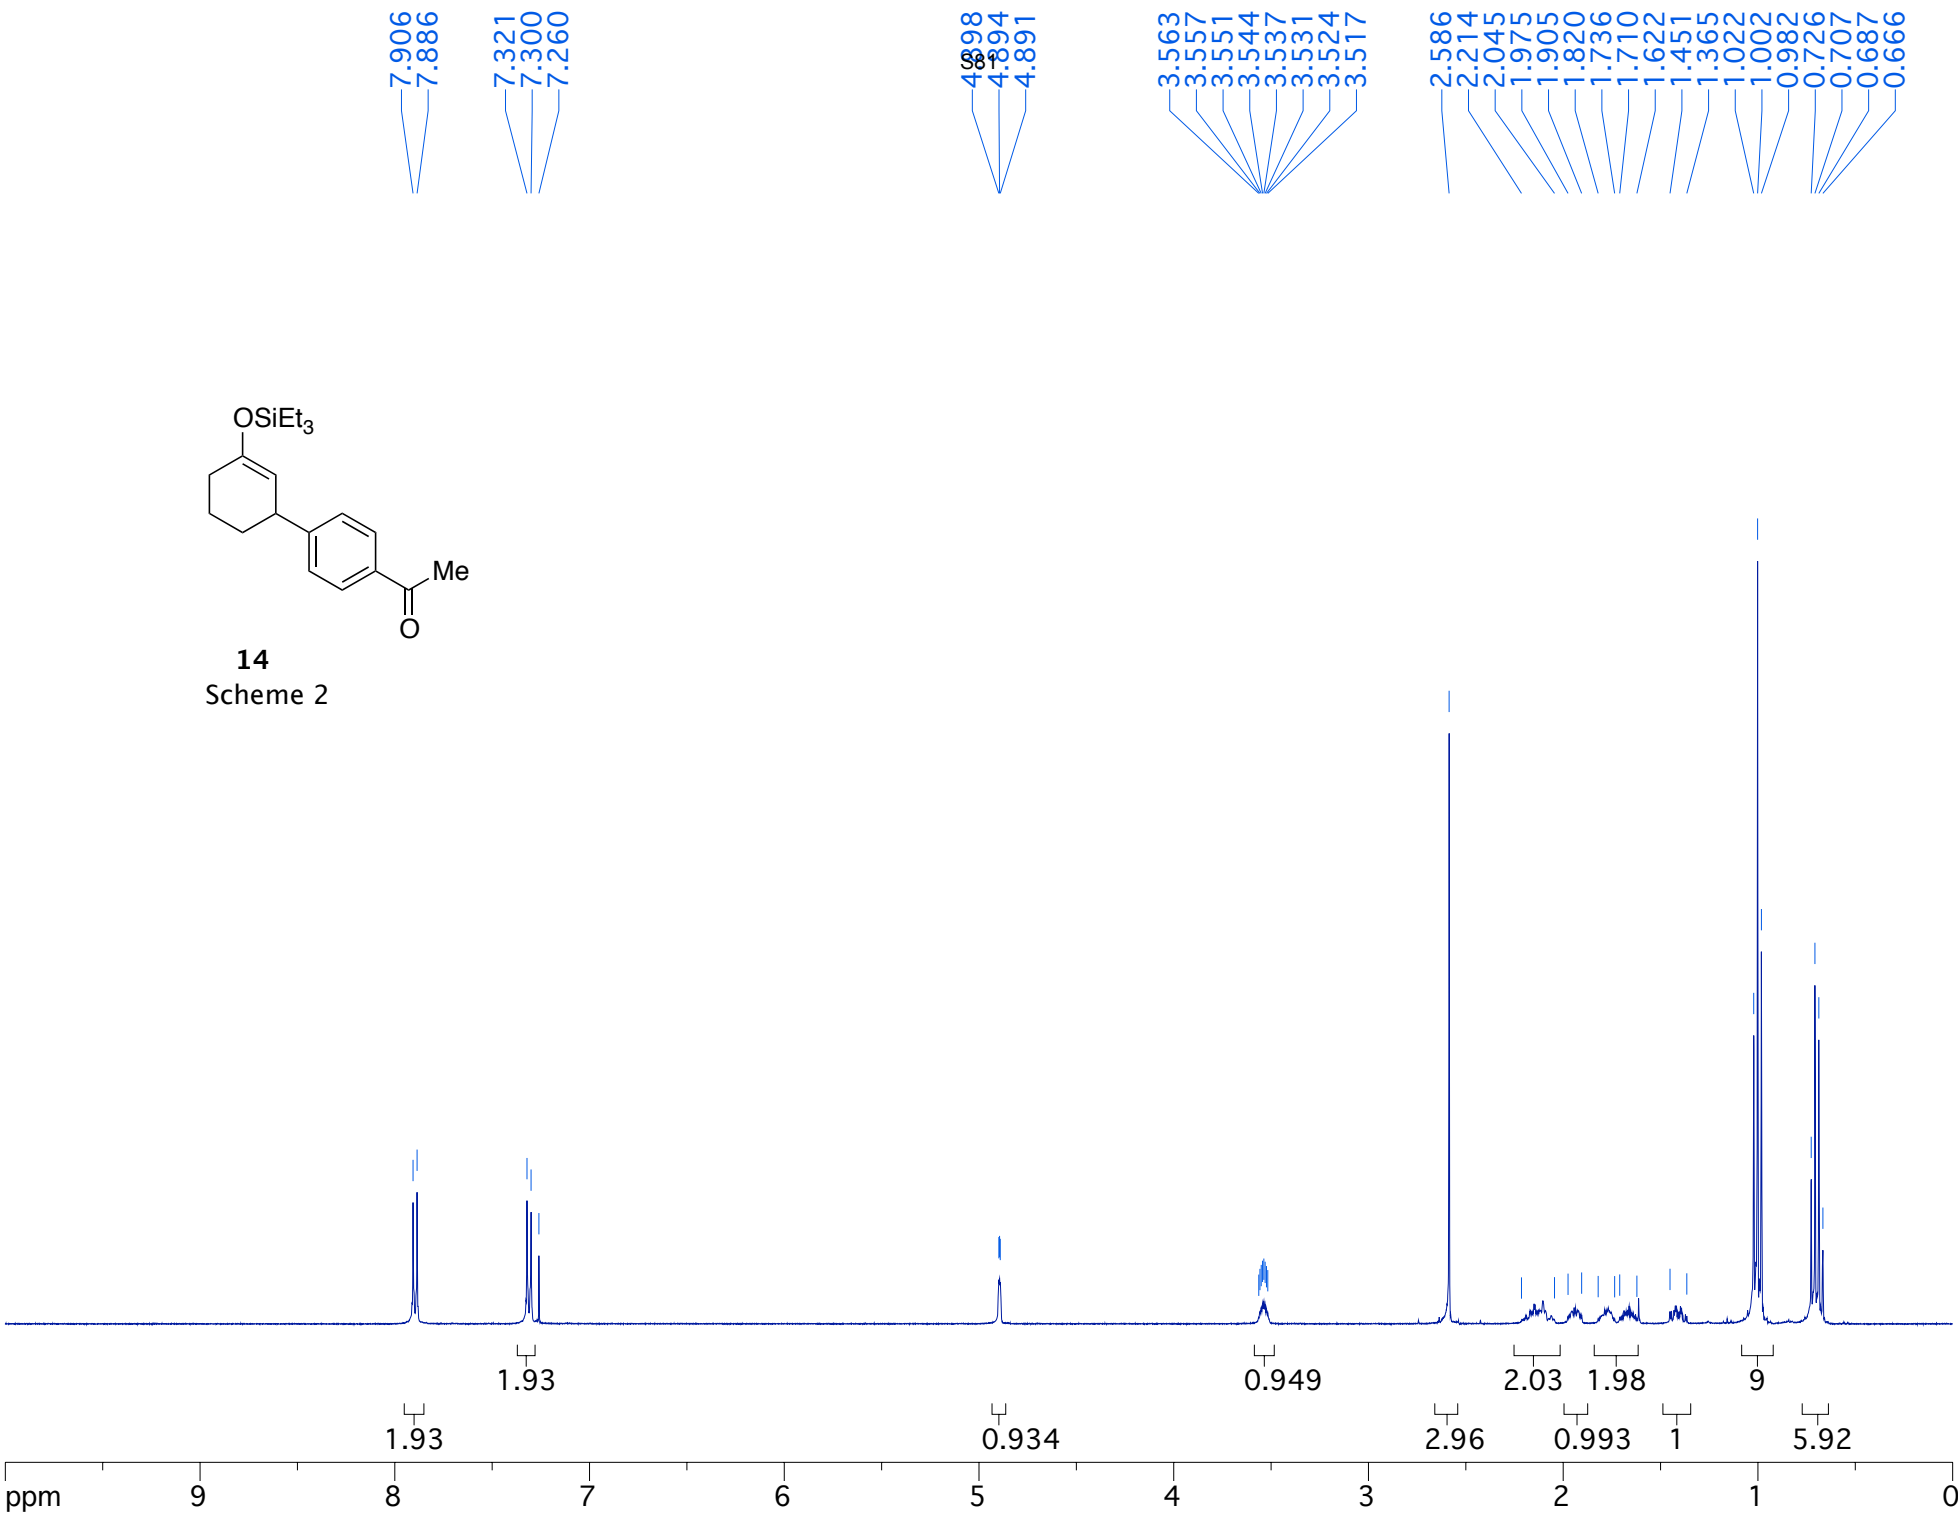

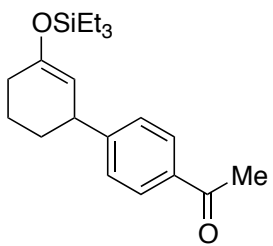

14  
Scheme 2

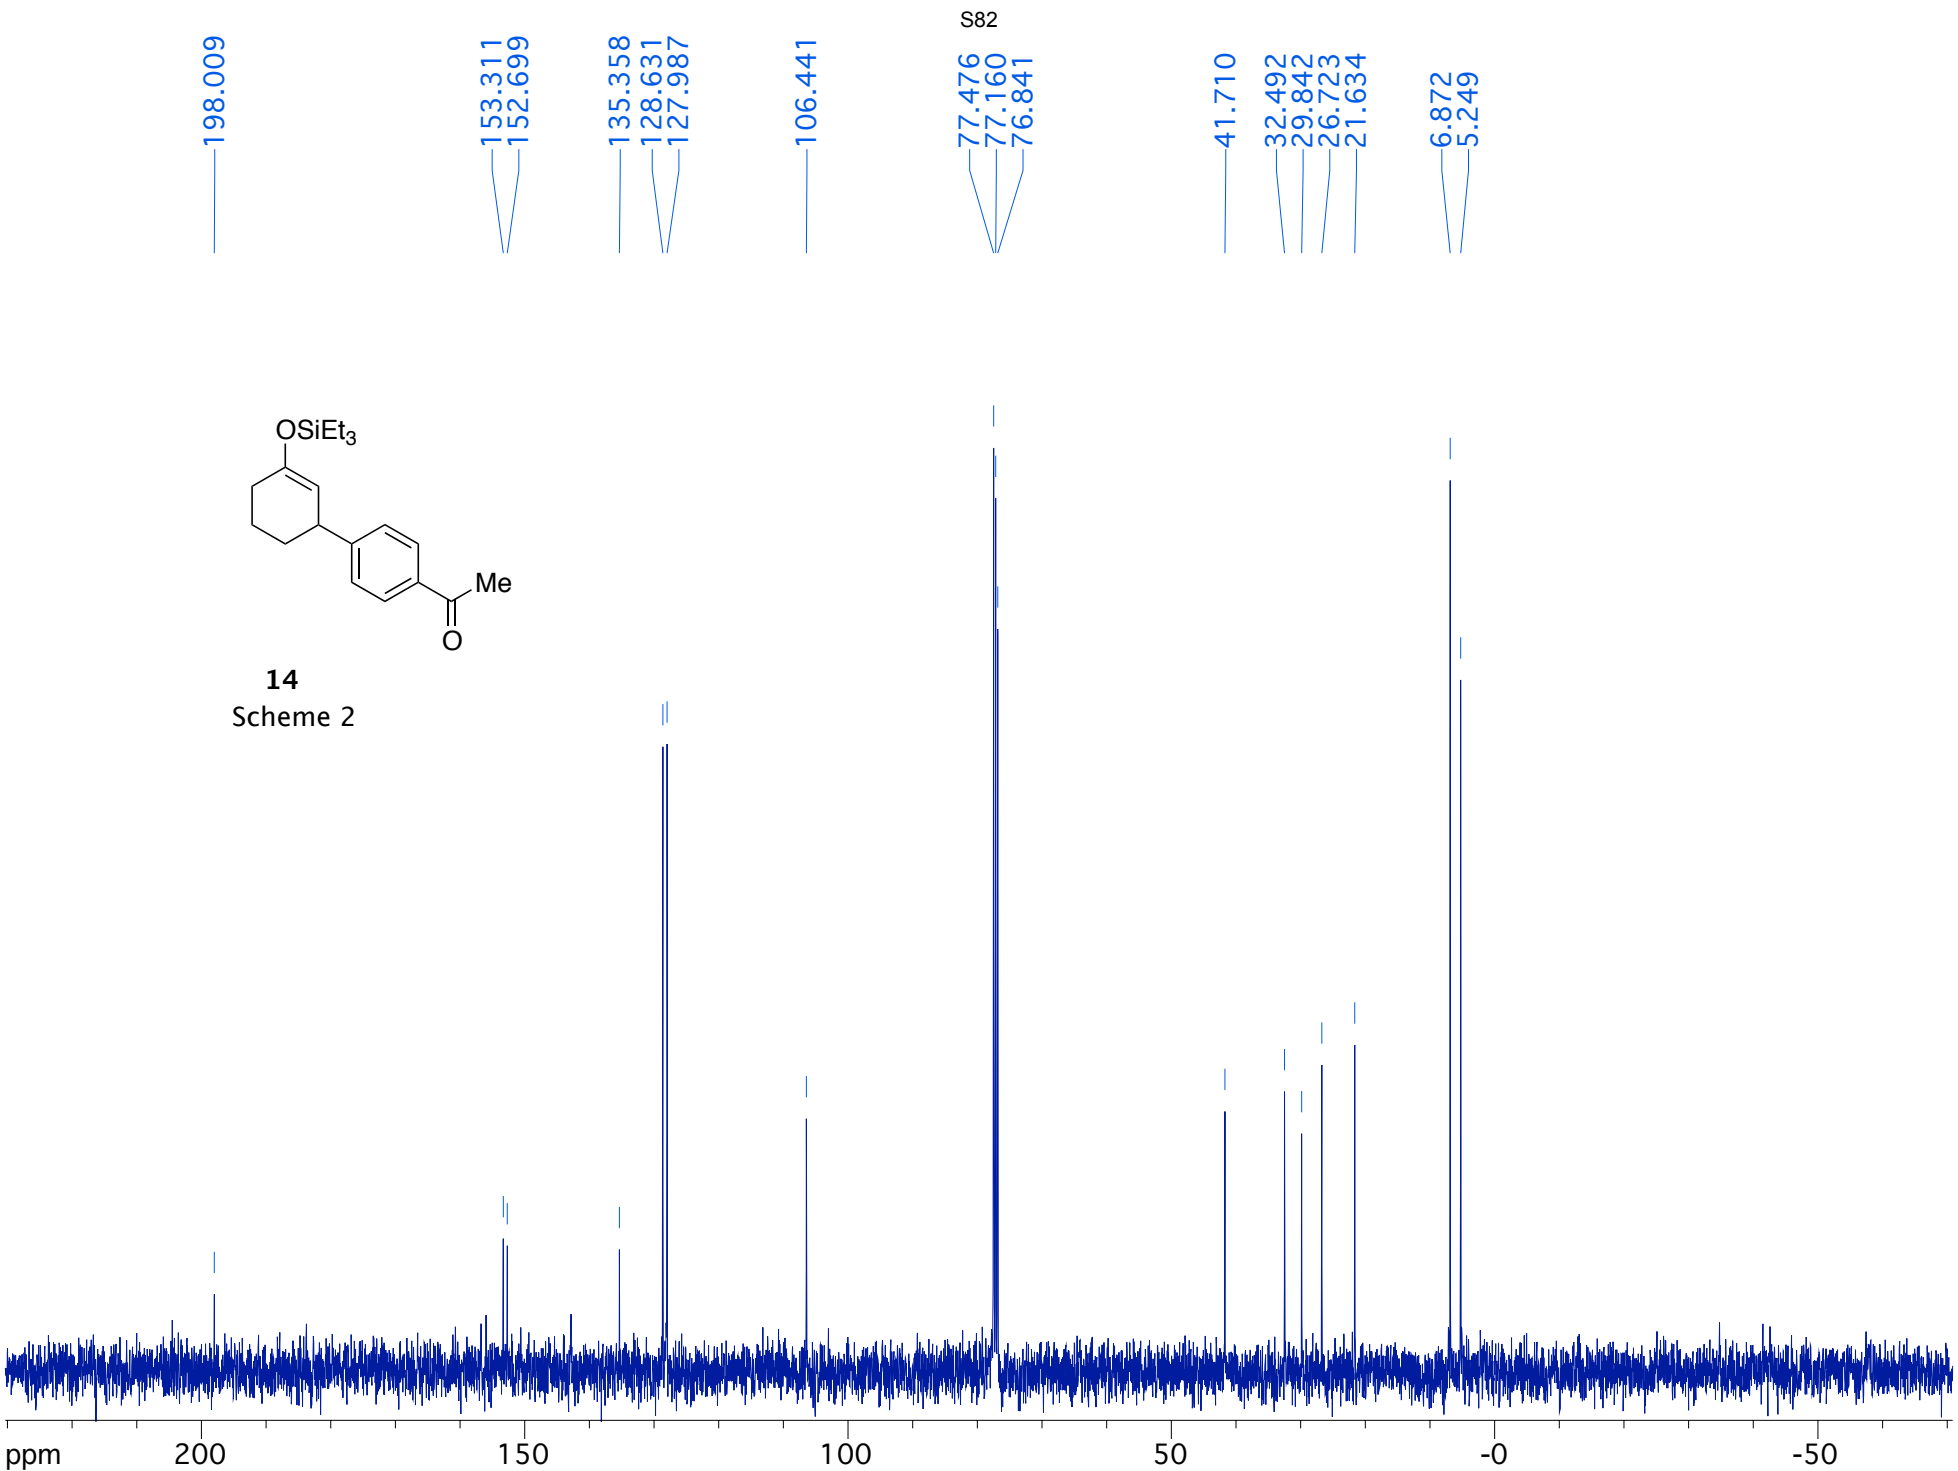



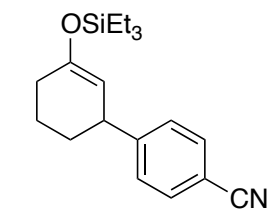

**15**

Scheme 2

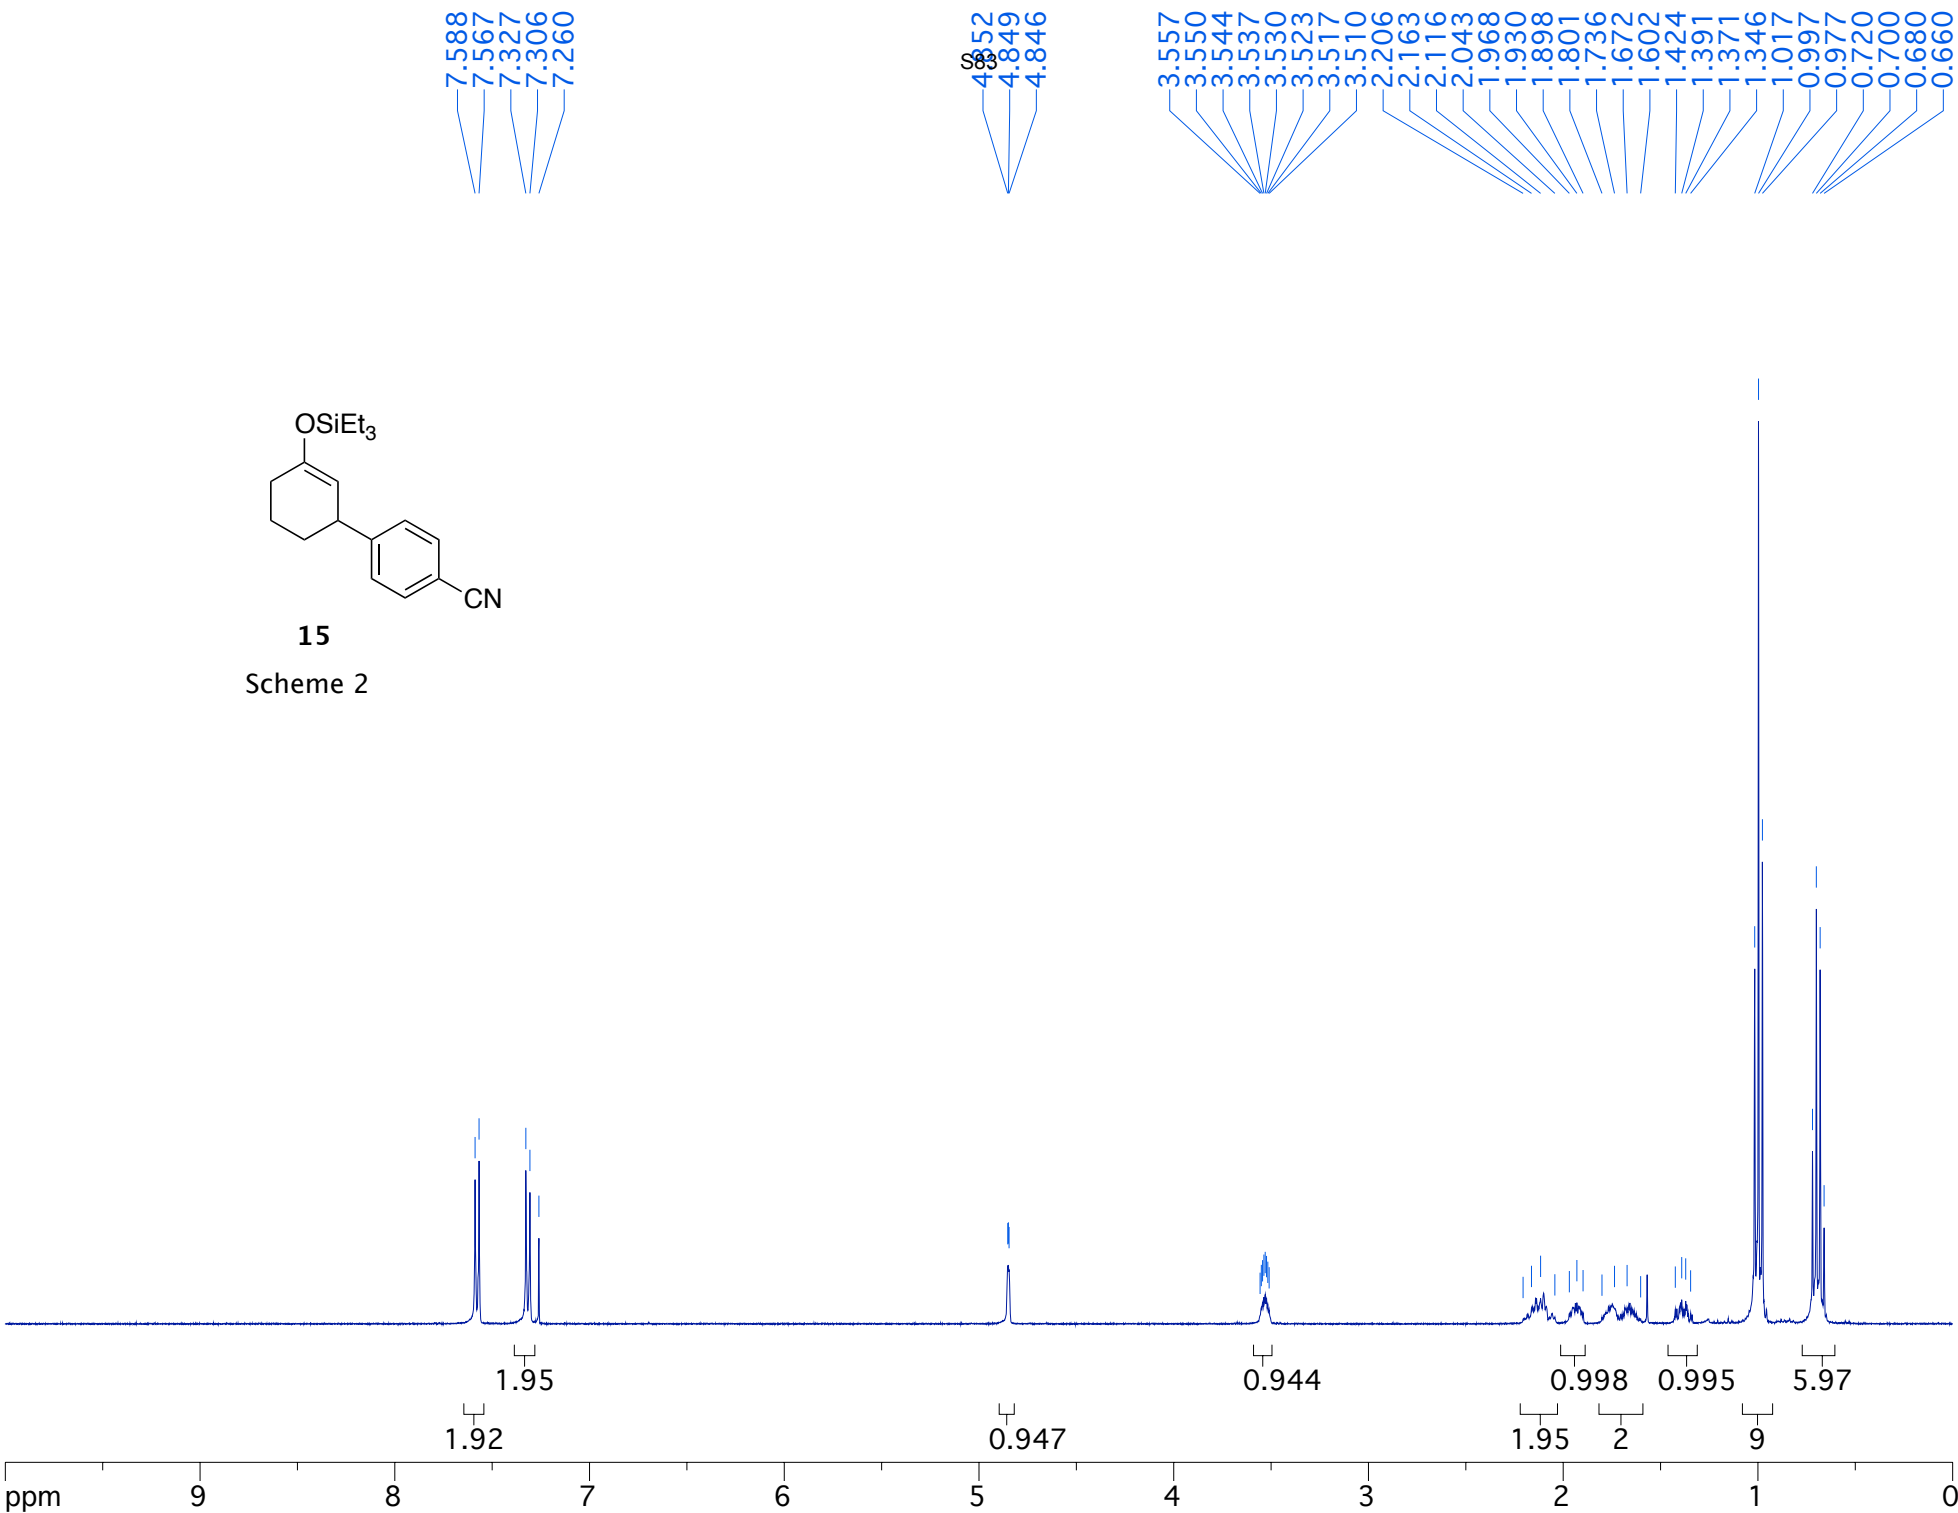

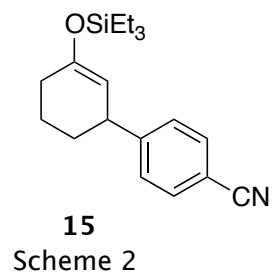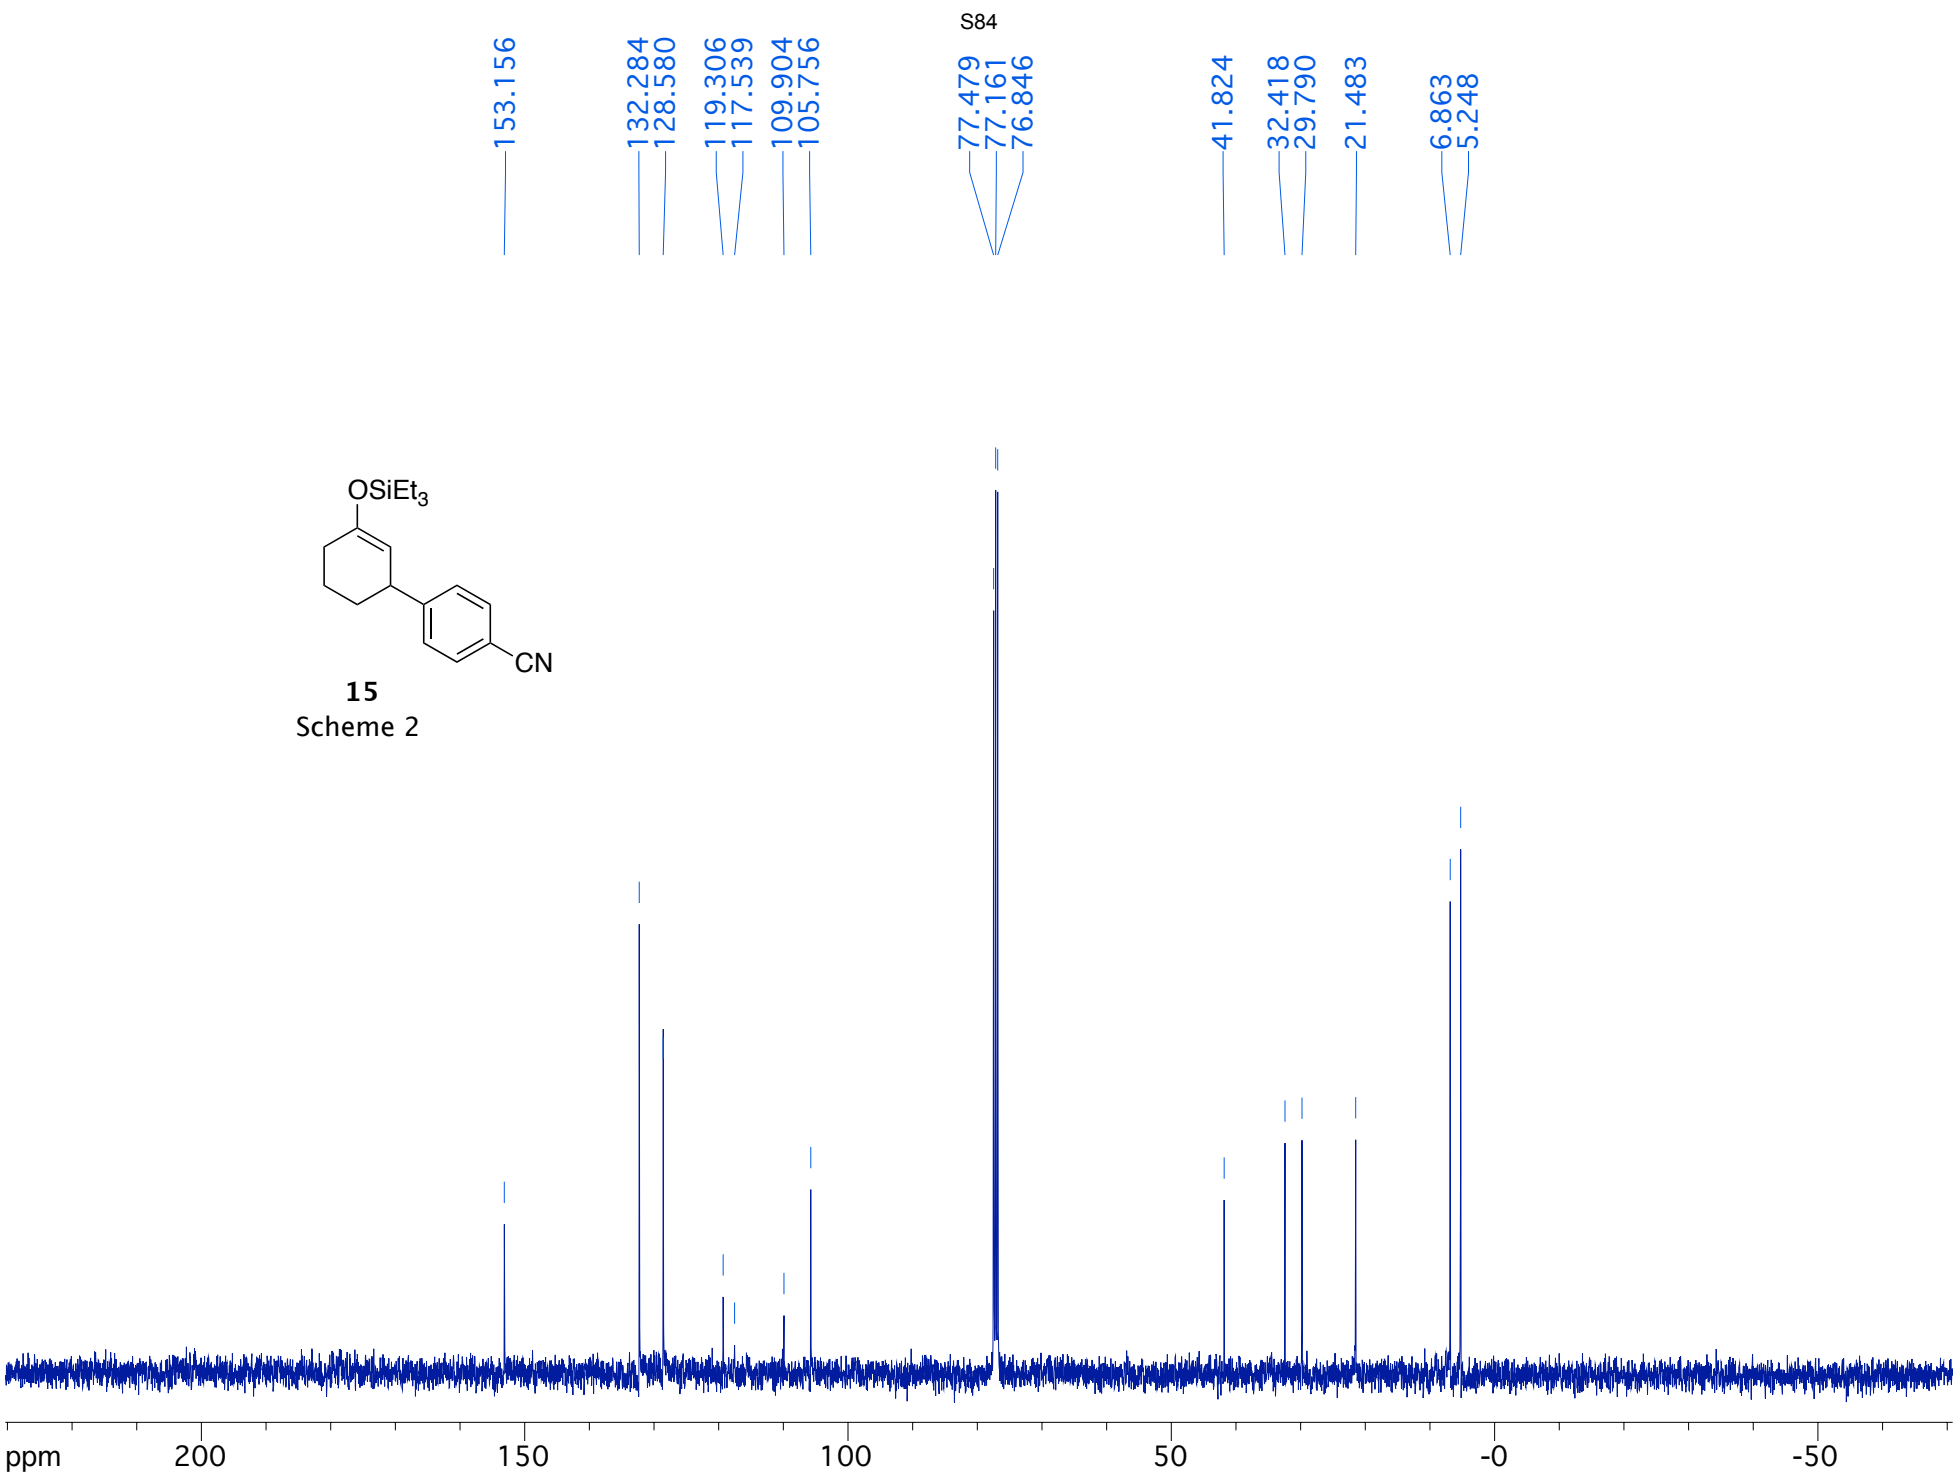

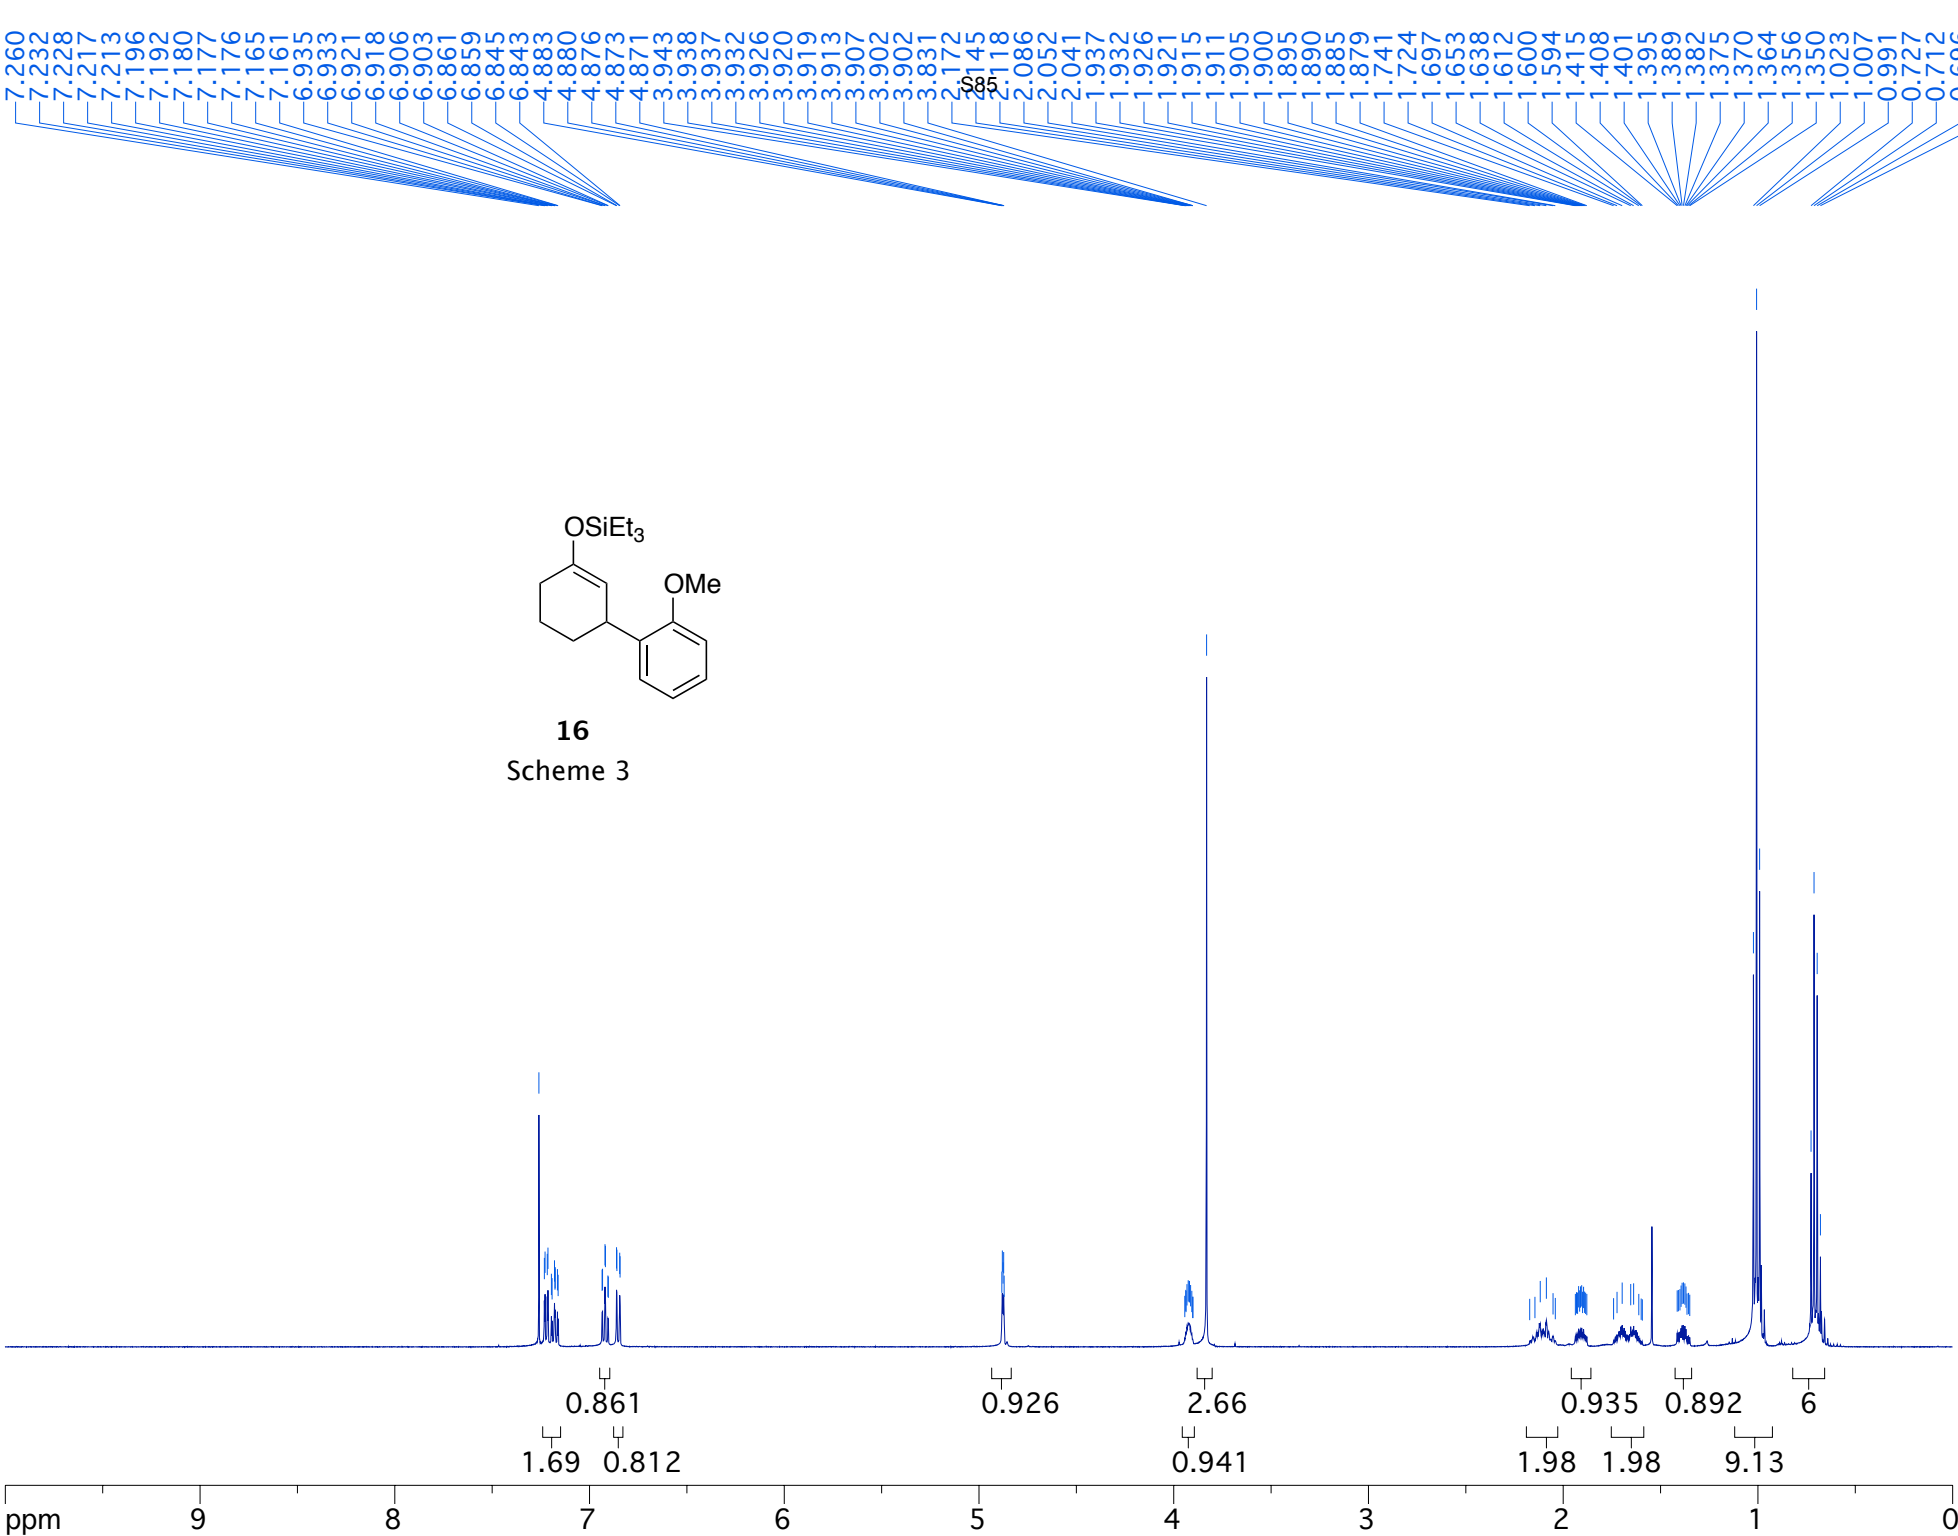

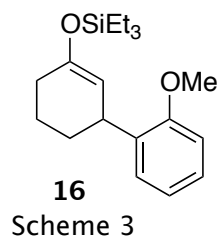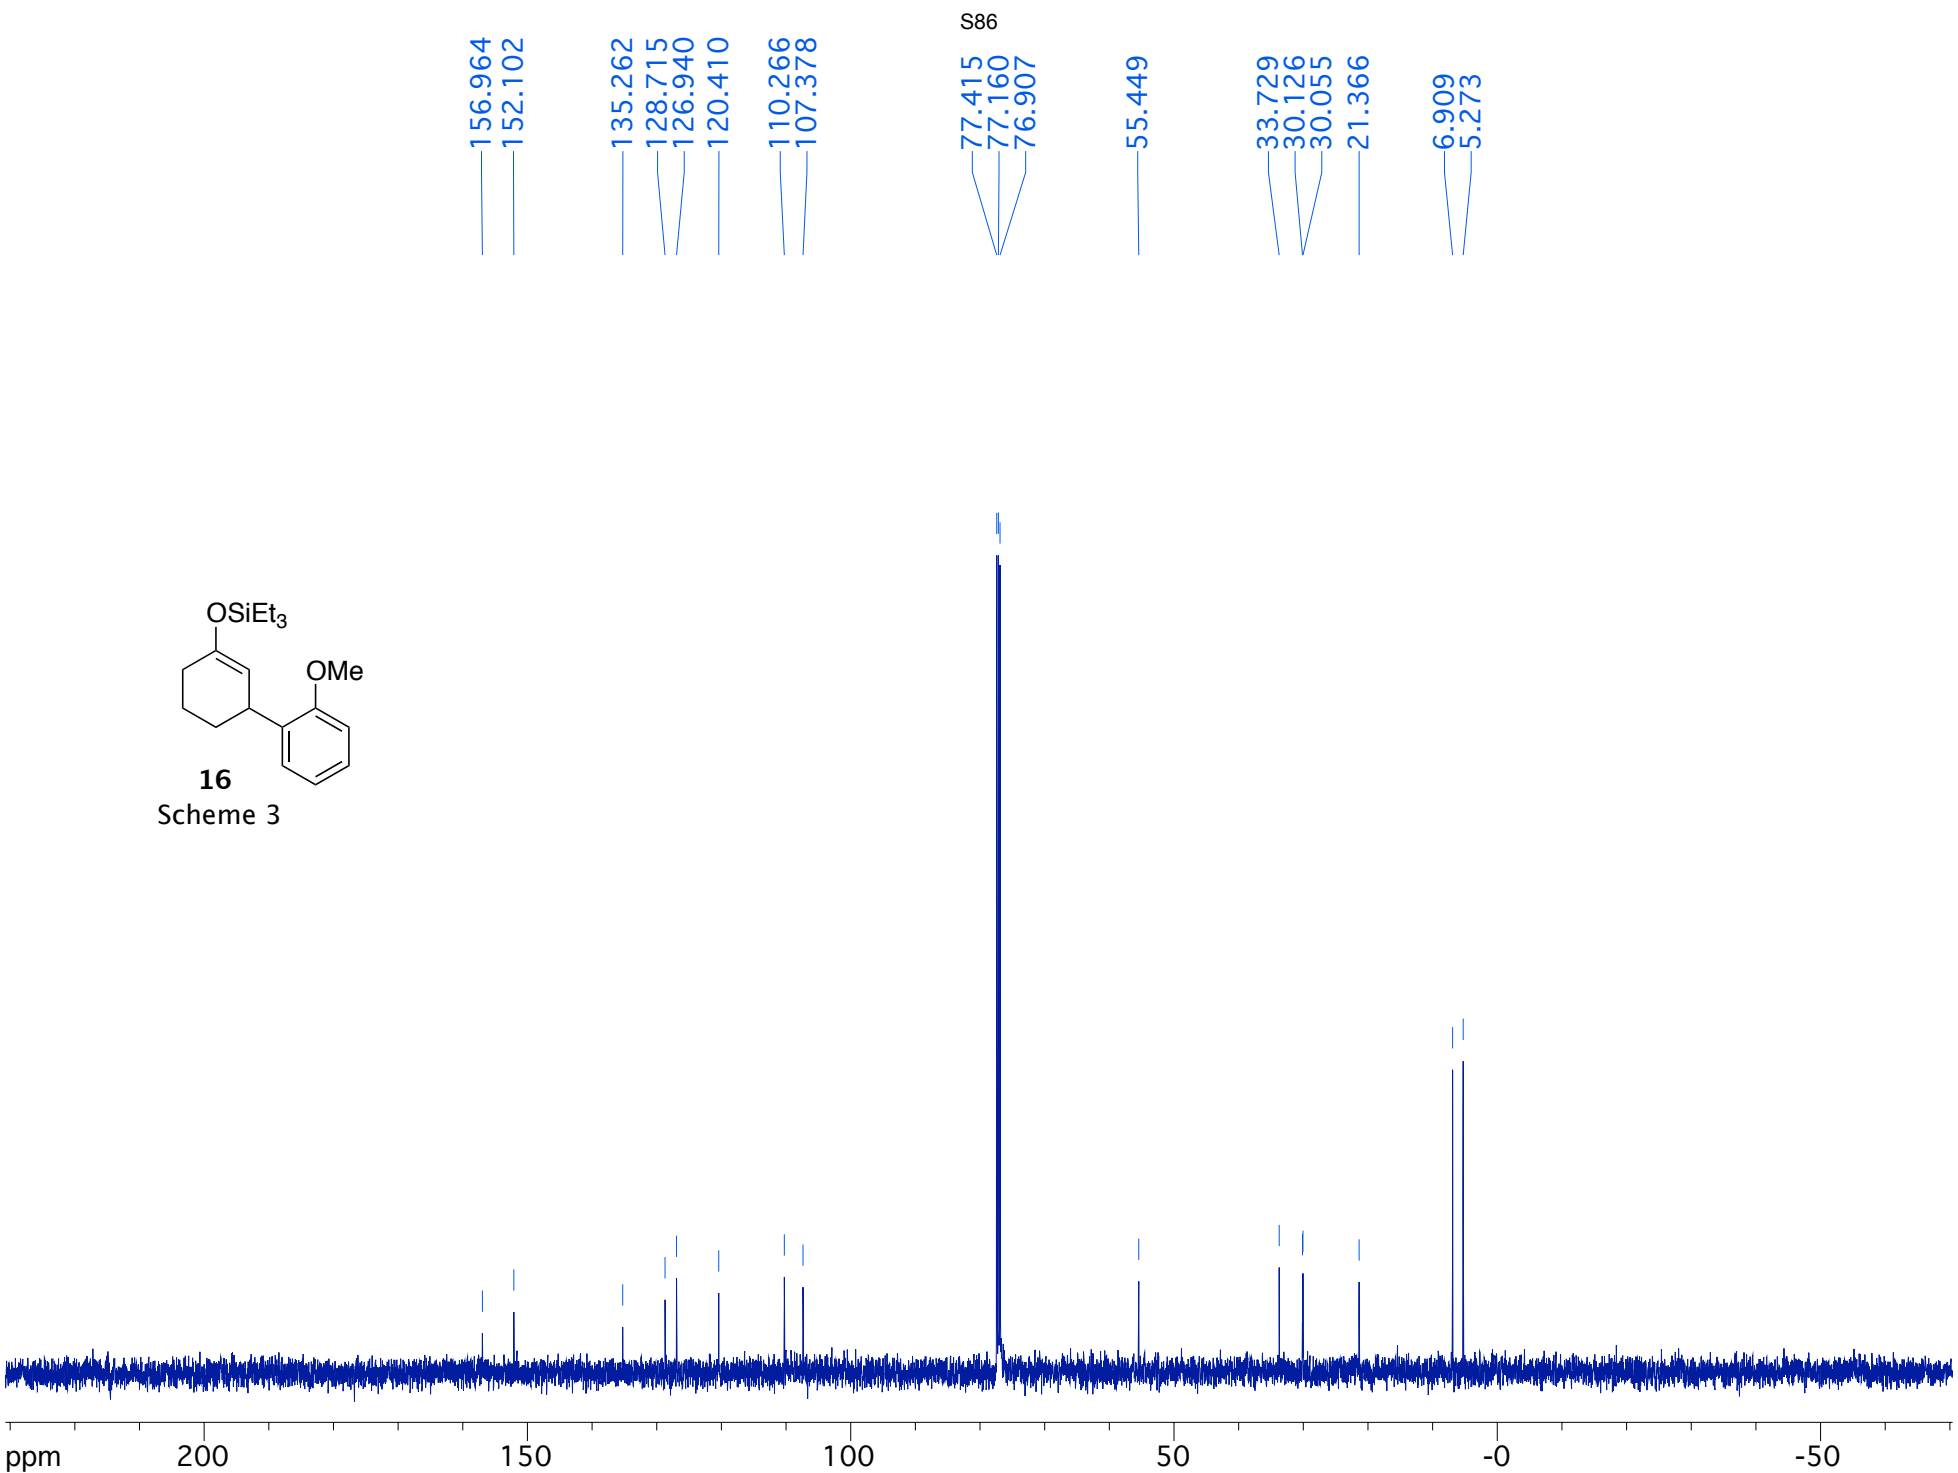

7.617  
7.614  
7.598  
7.595  
7.547  
7.544  
7.528  
7.525  
7.509  
7.505  
7.407  
7.389  
7.387  
7.301  
7.298  
7.282  
7.279  
7.260

4.843  
4.840  
4.836  
3.981  
3.975  
3.969  
3.962  
3.956  
3.949  
3.943  
3.936  
3.929

2.219  
2.180  
2.112  
2.054  
2.023  
1.789  
1.730  
1.667  
1.452  
1.442  
1.419  
1.399  
1.366  
1.022  
1.002  
0.983  
0.729  
0.710  
0.690  
0.669

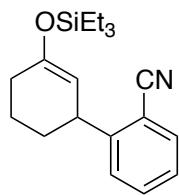

**17**  
Scheme 3

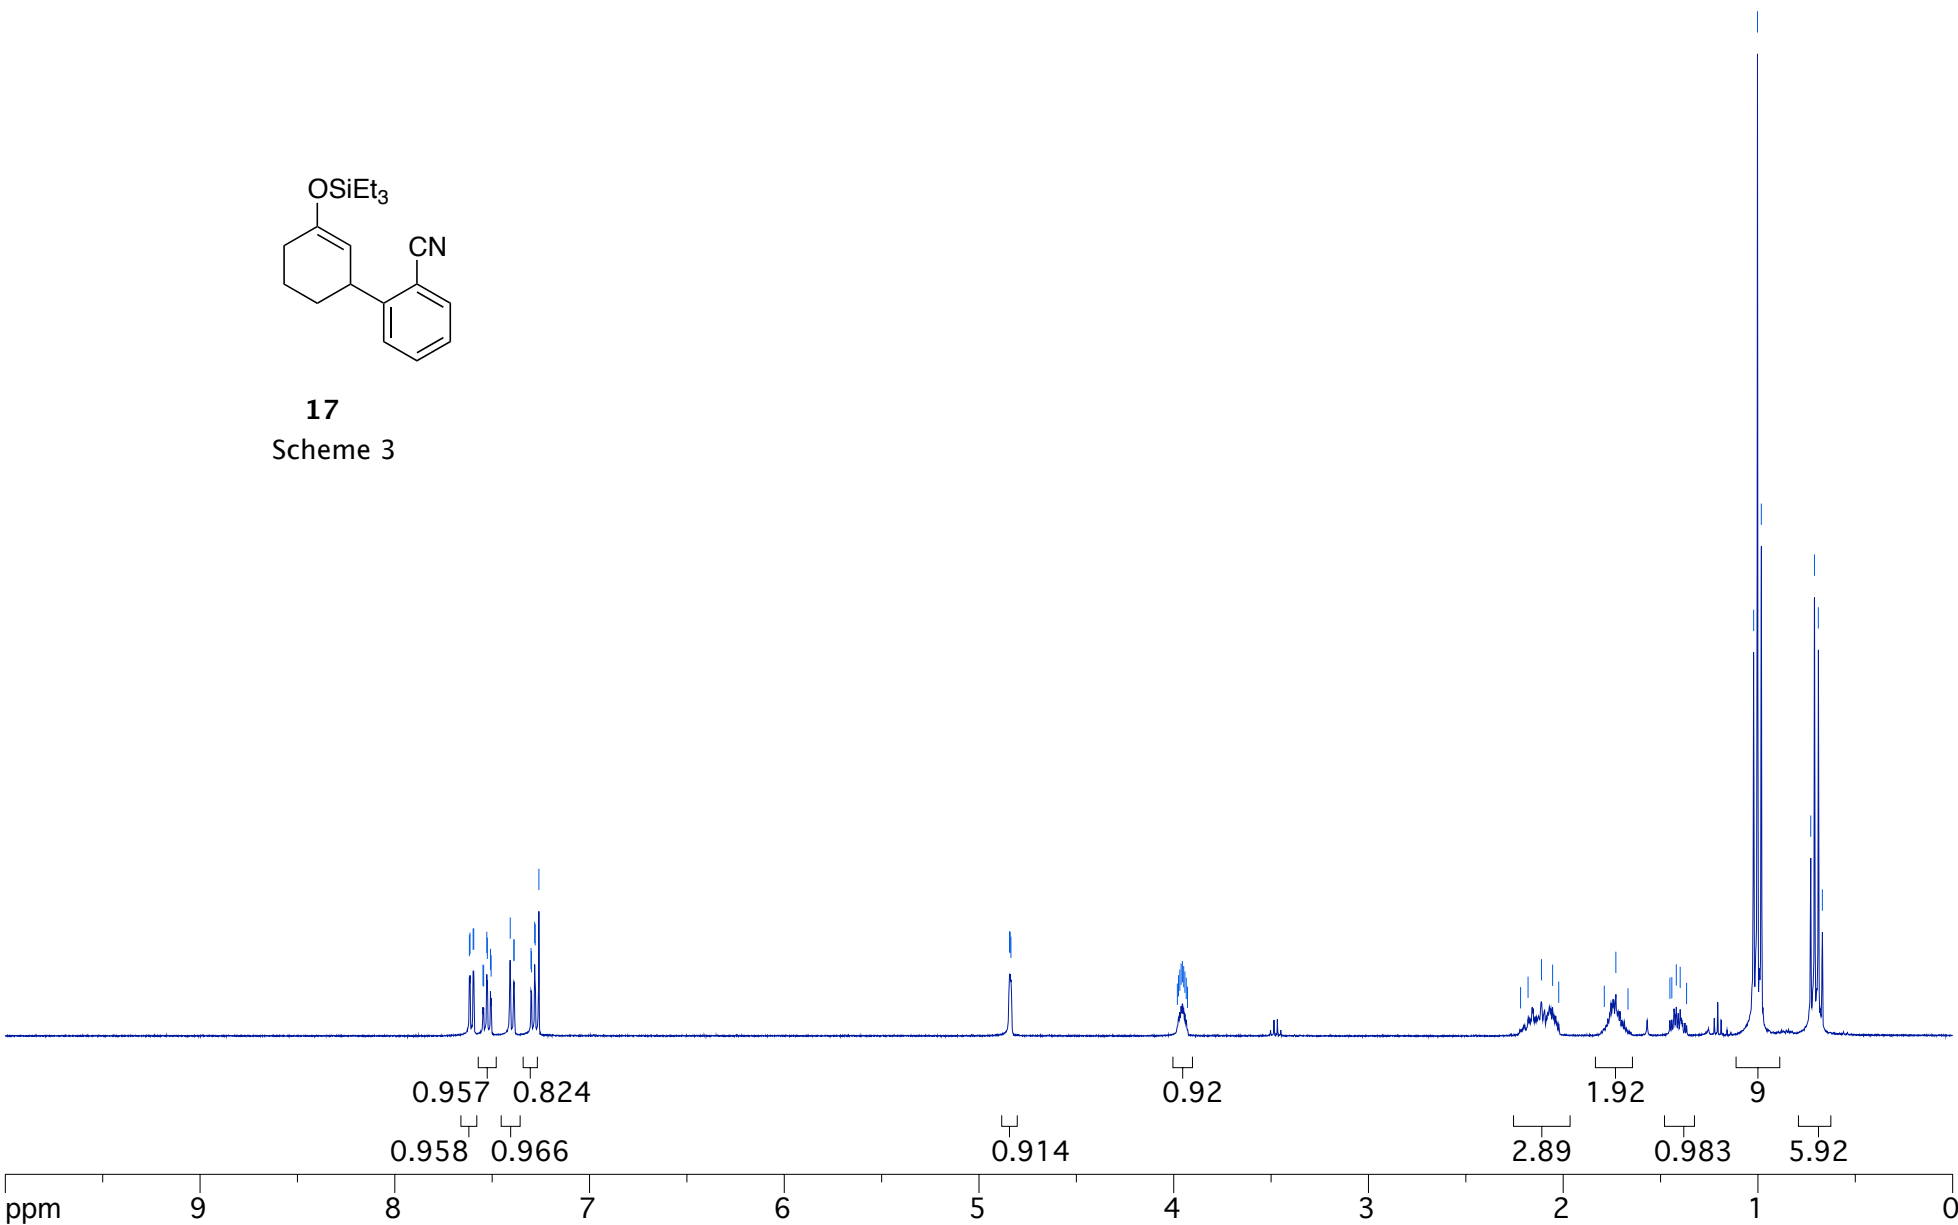

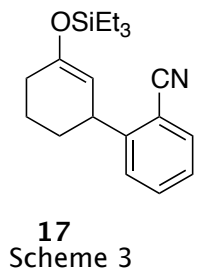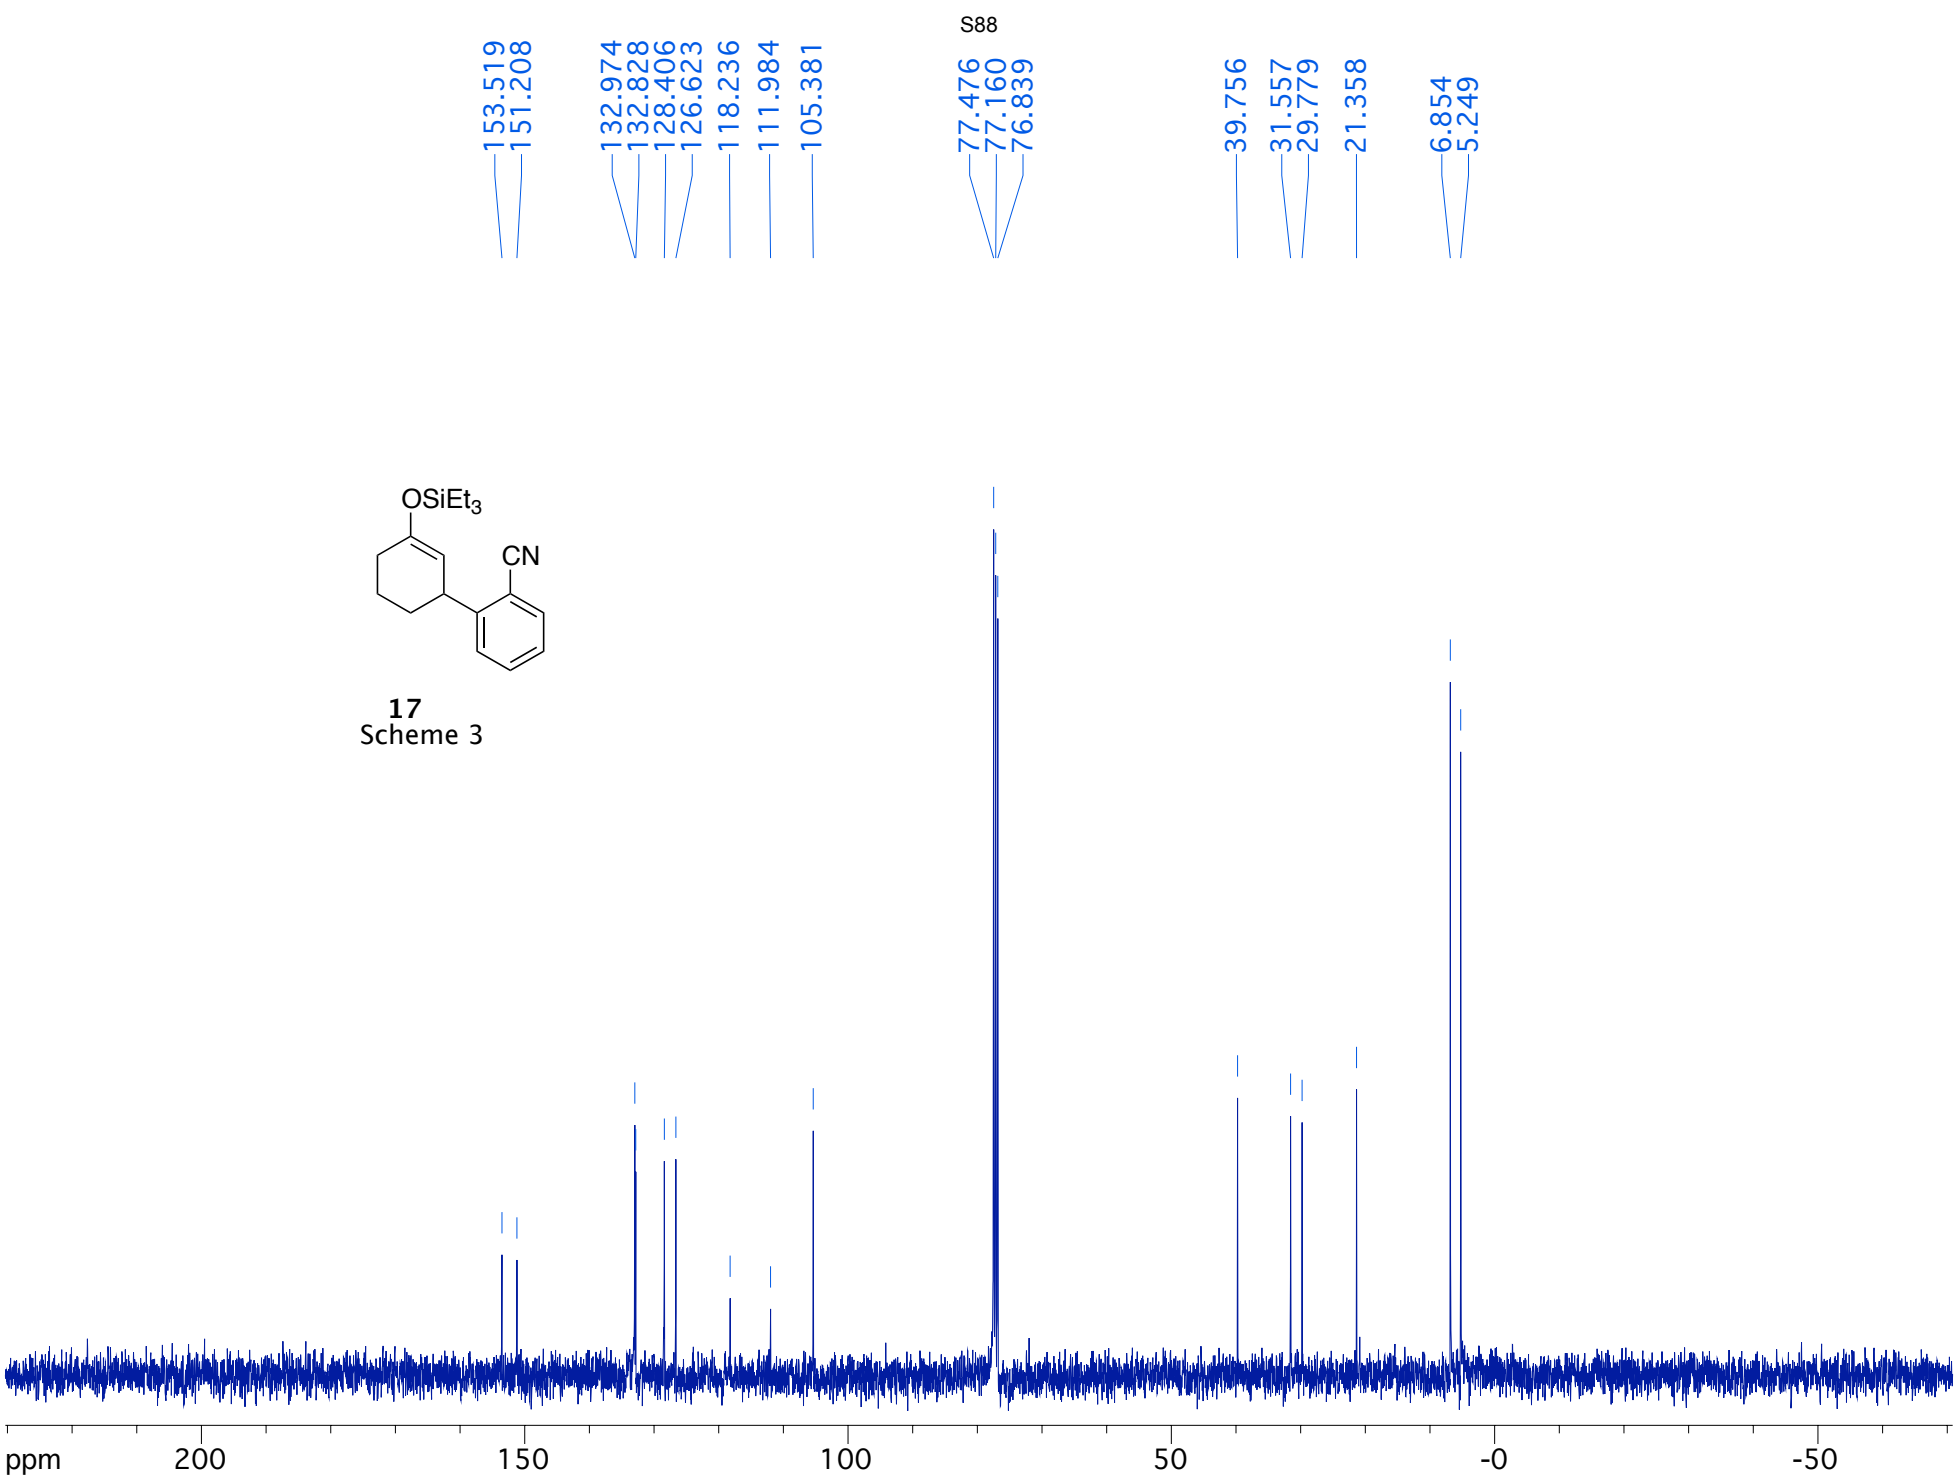

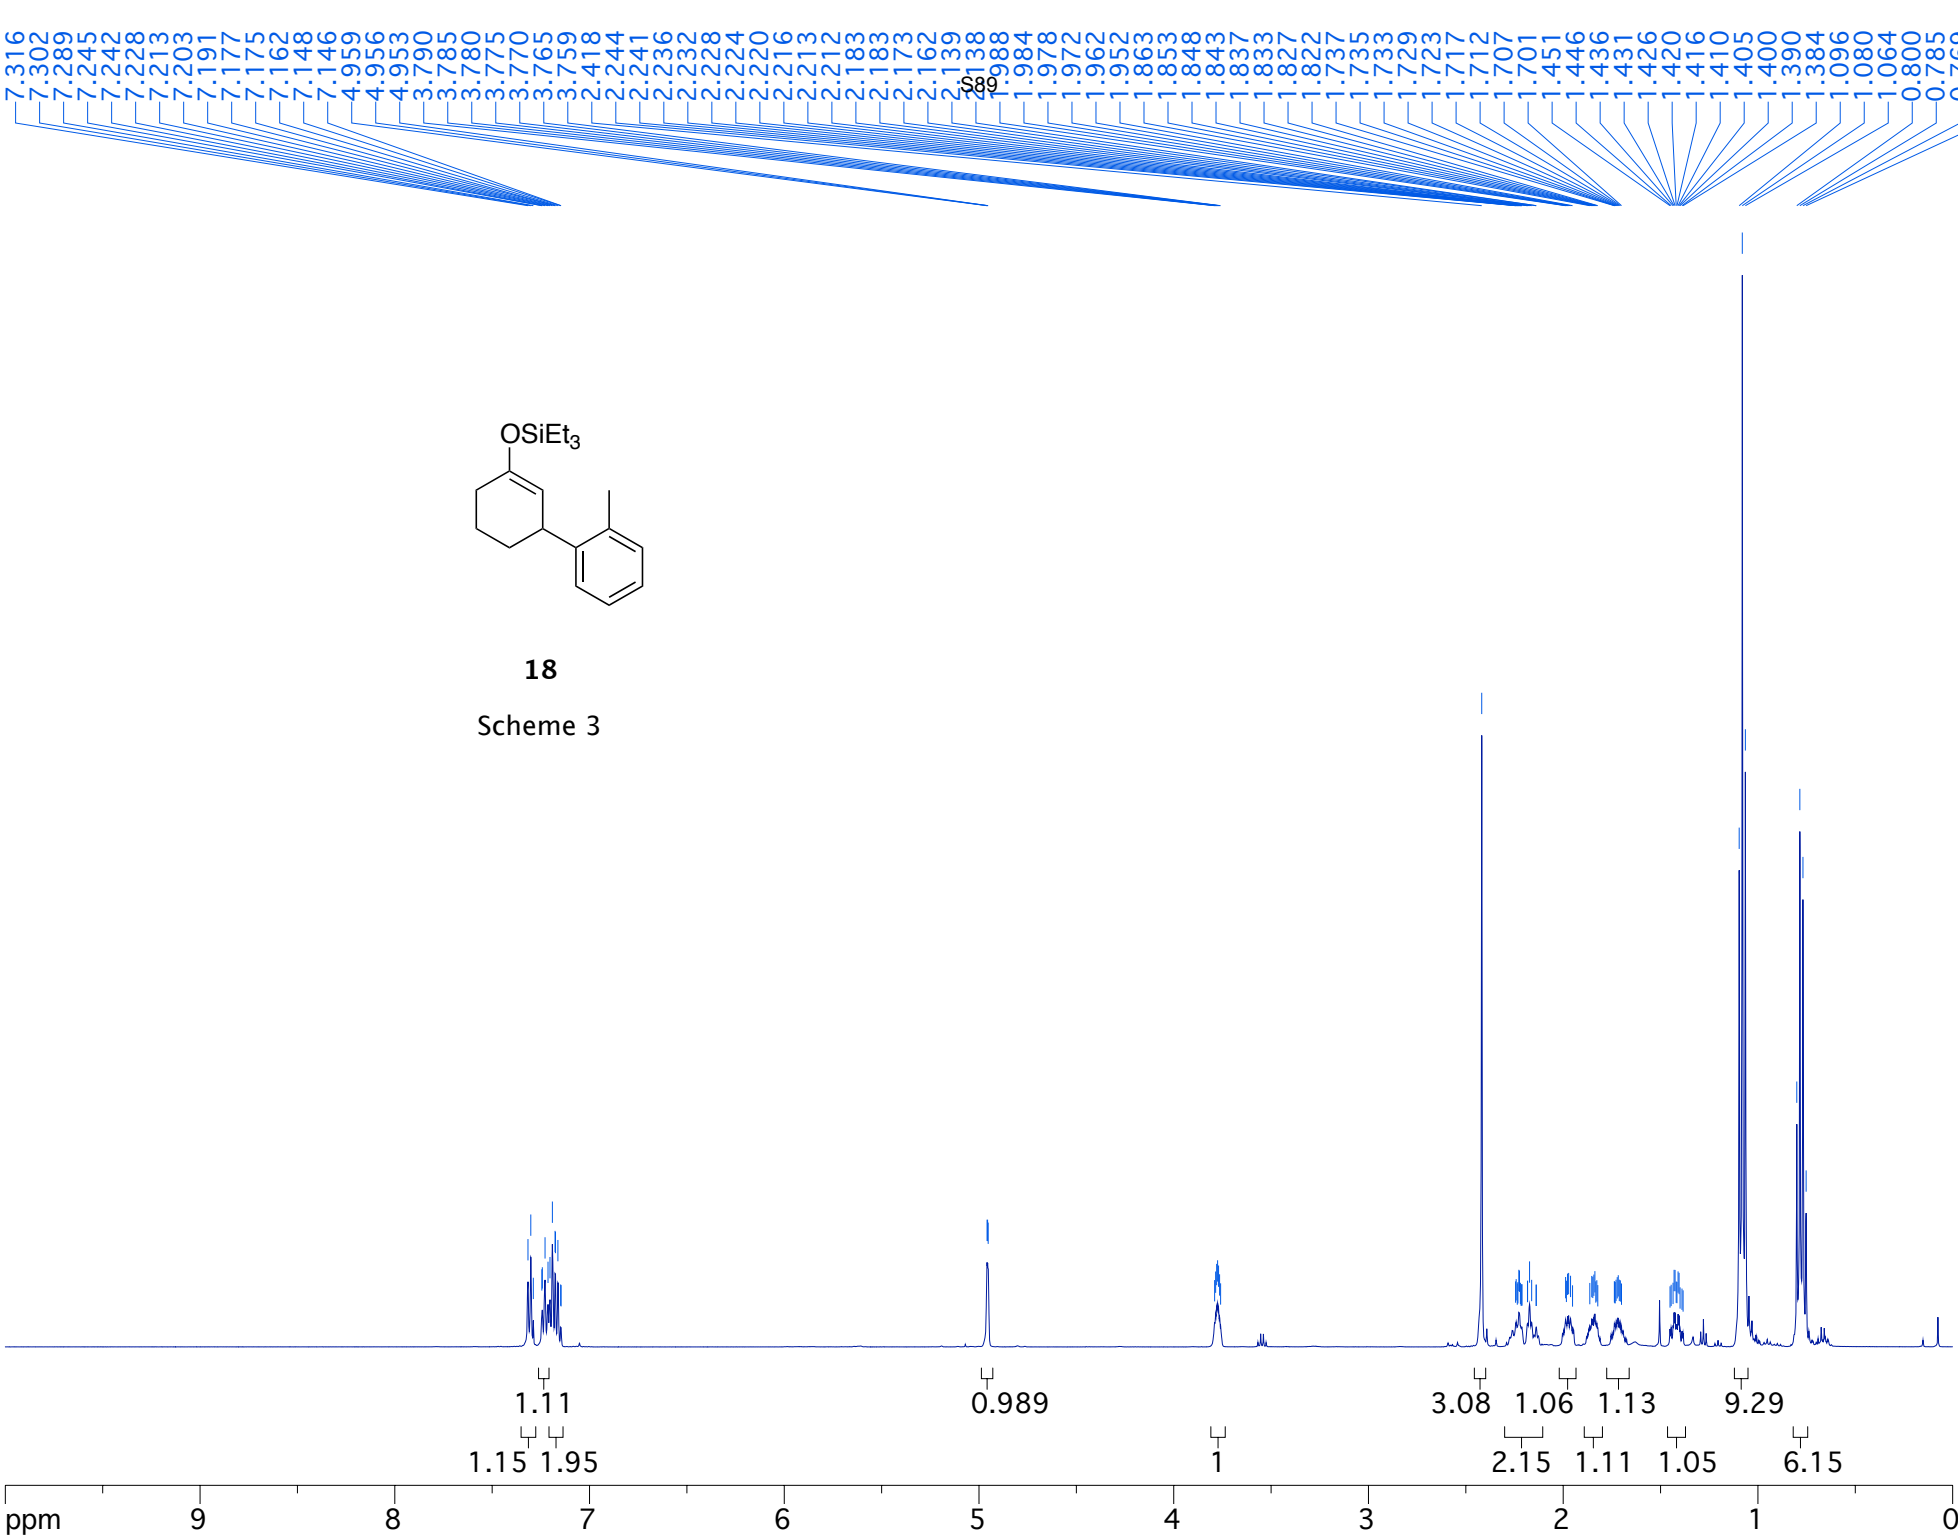

S90

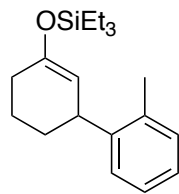

**18**

Scheme 3

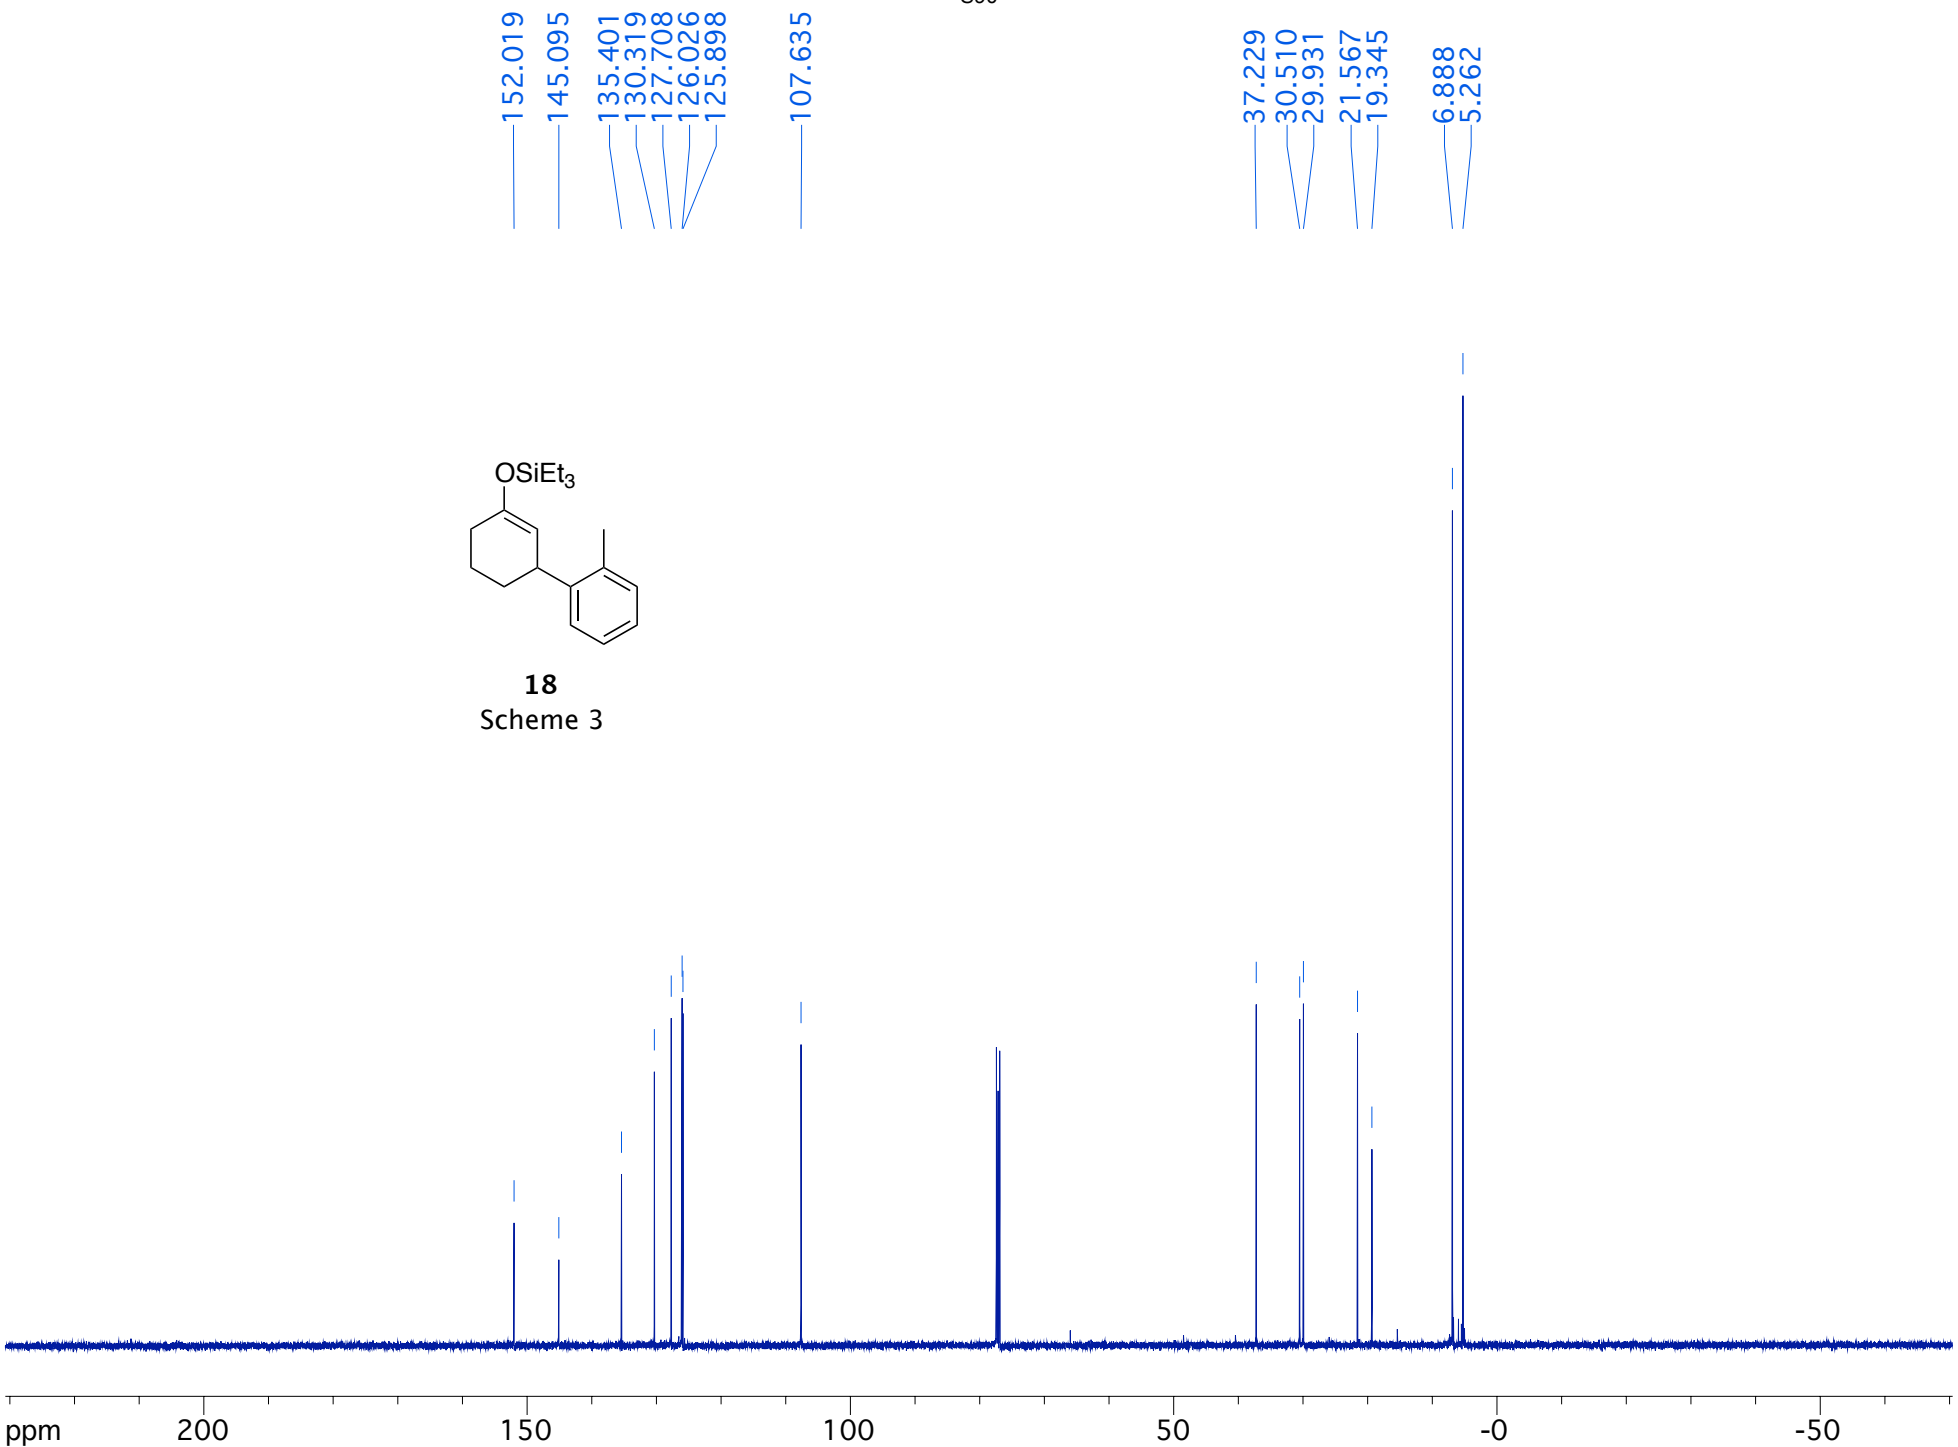



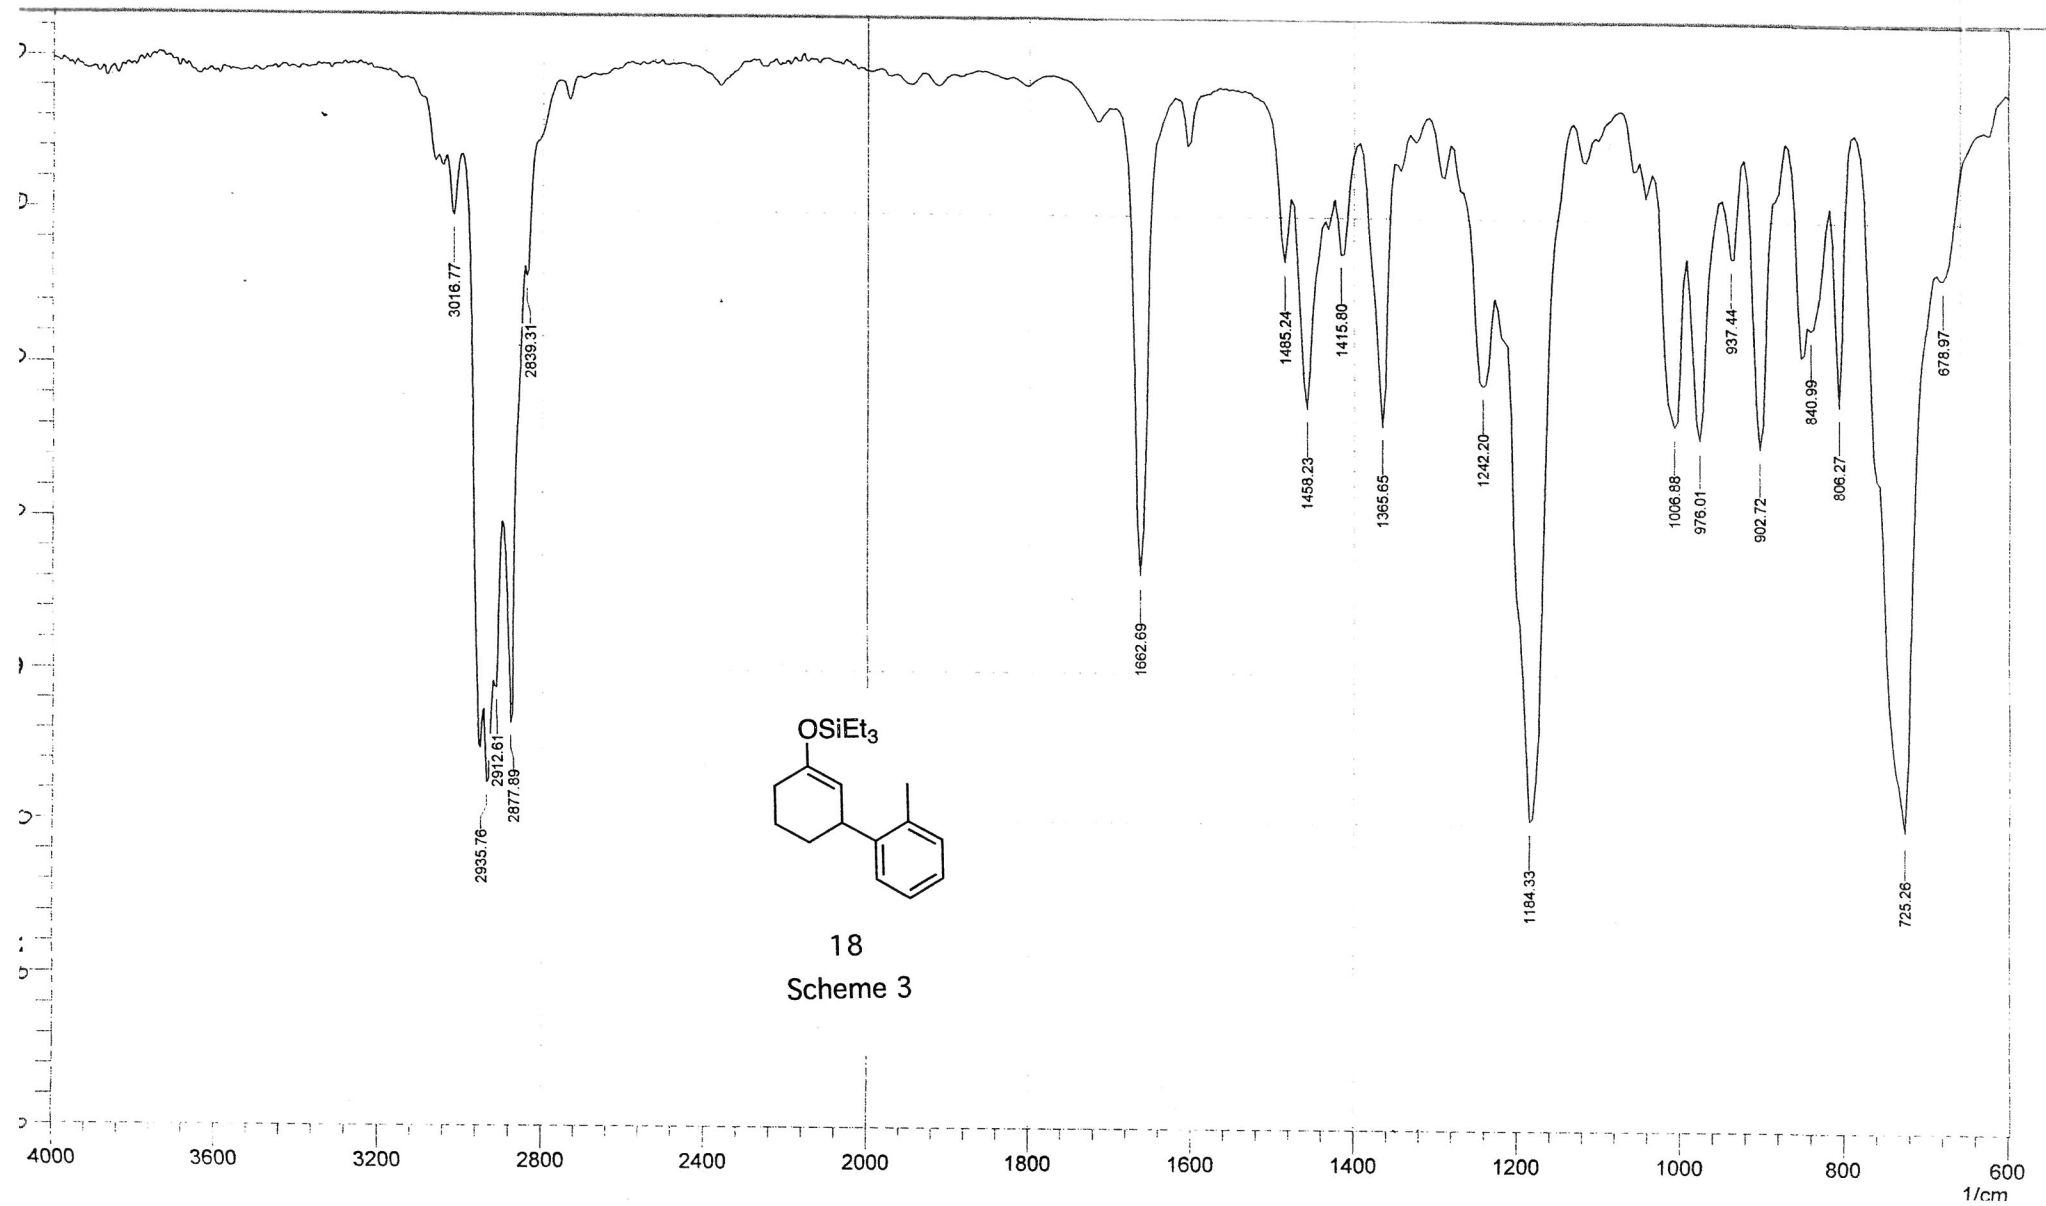

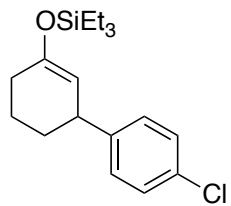

**19**

Scheme 4

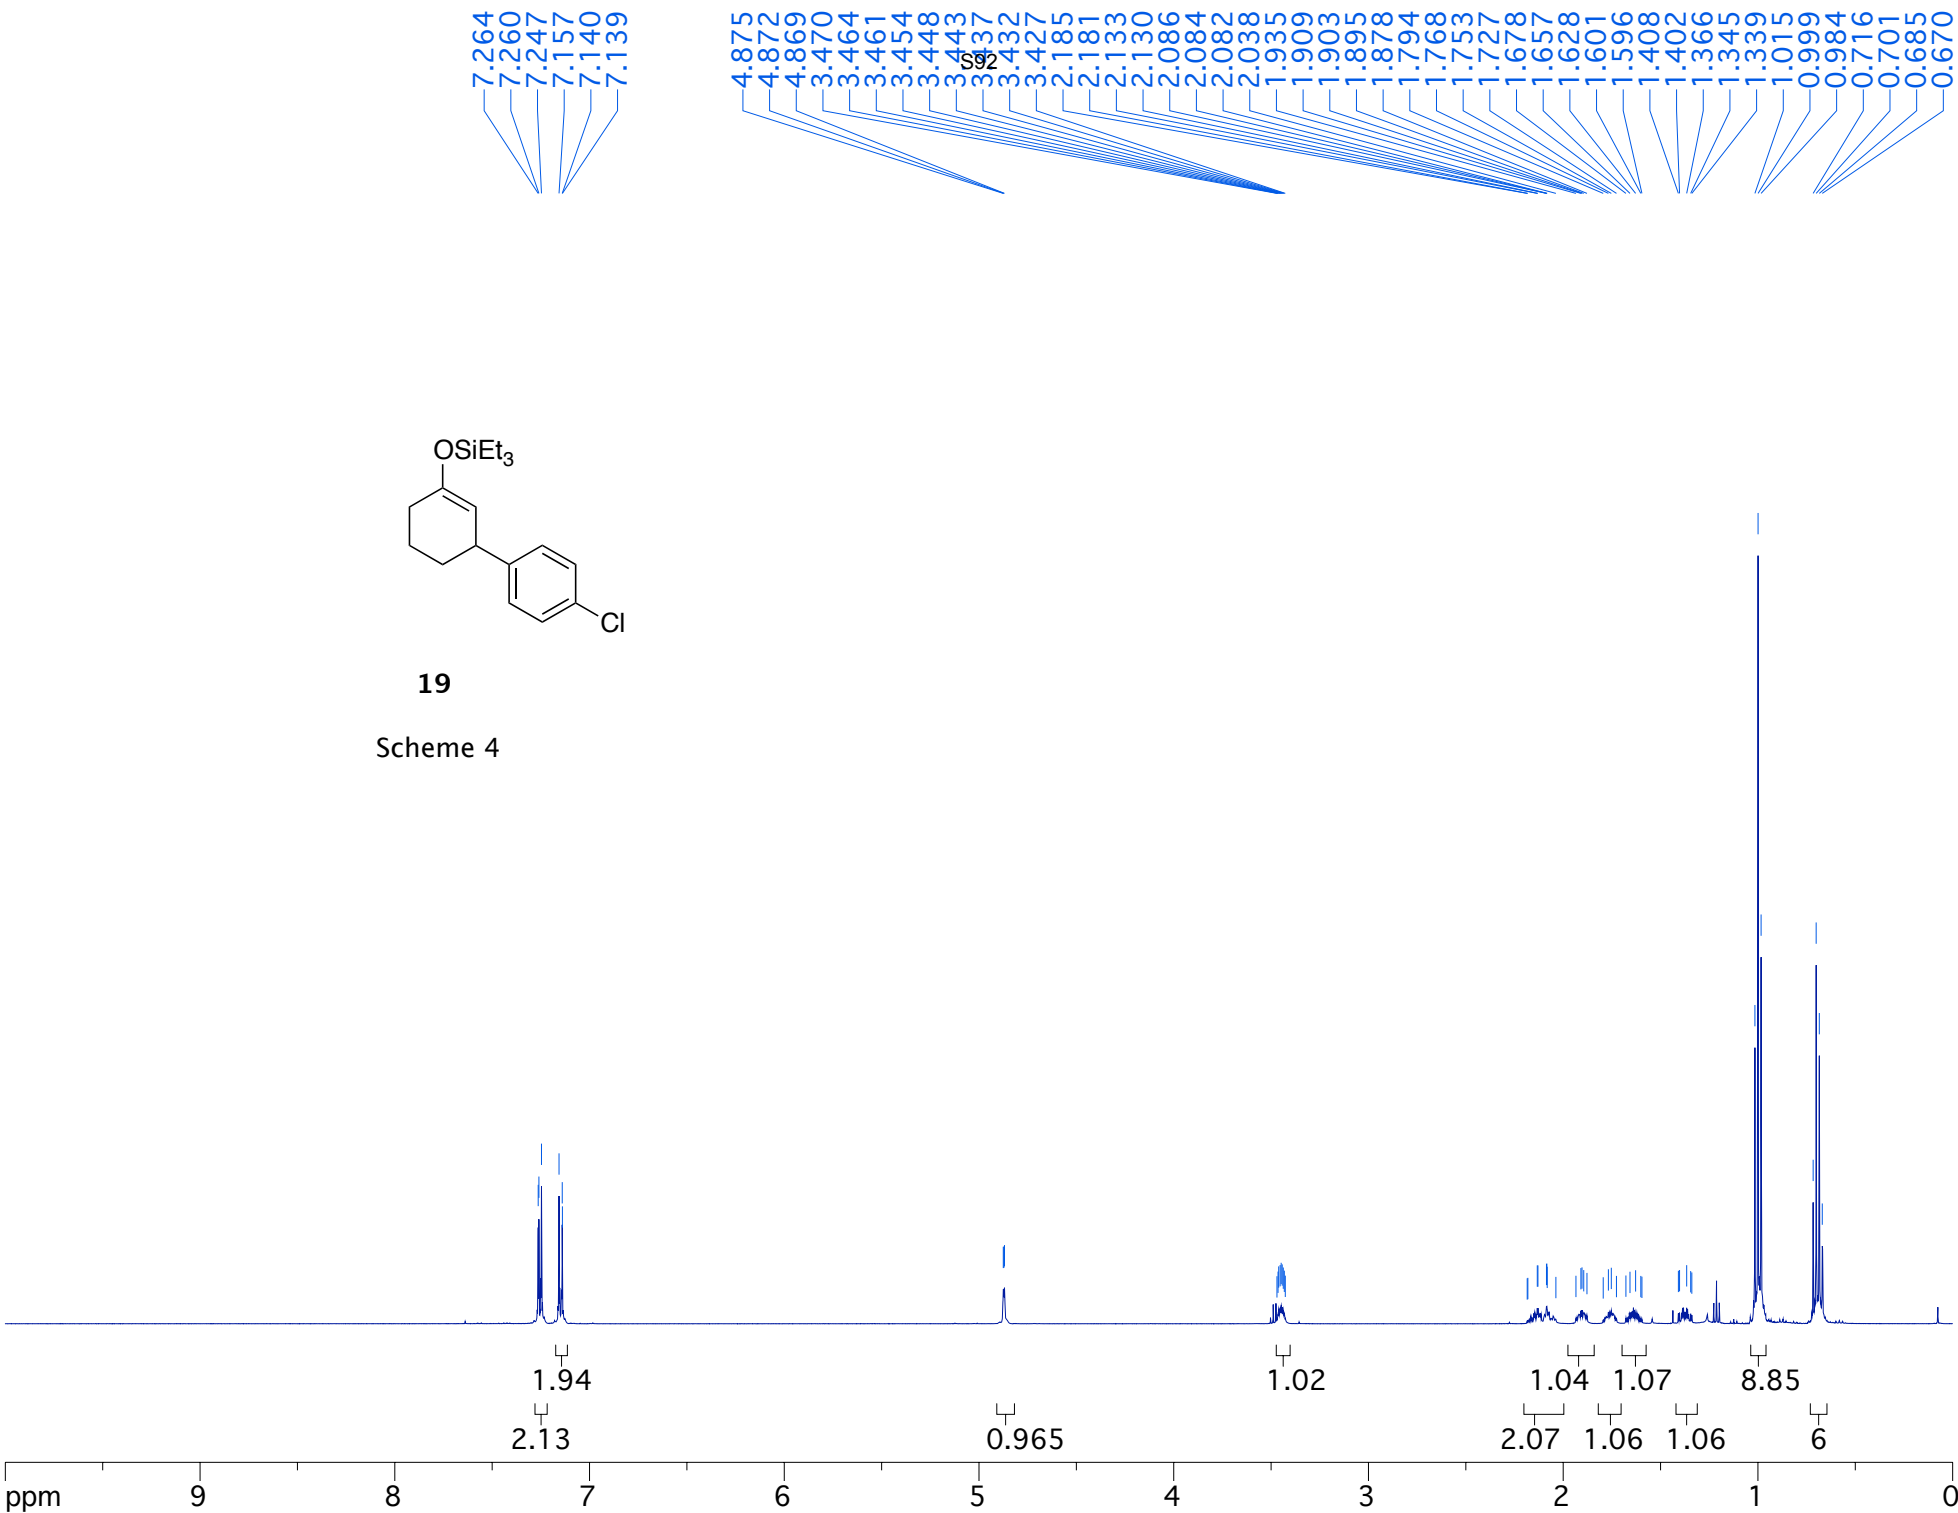

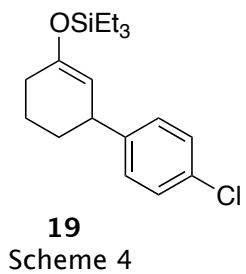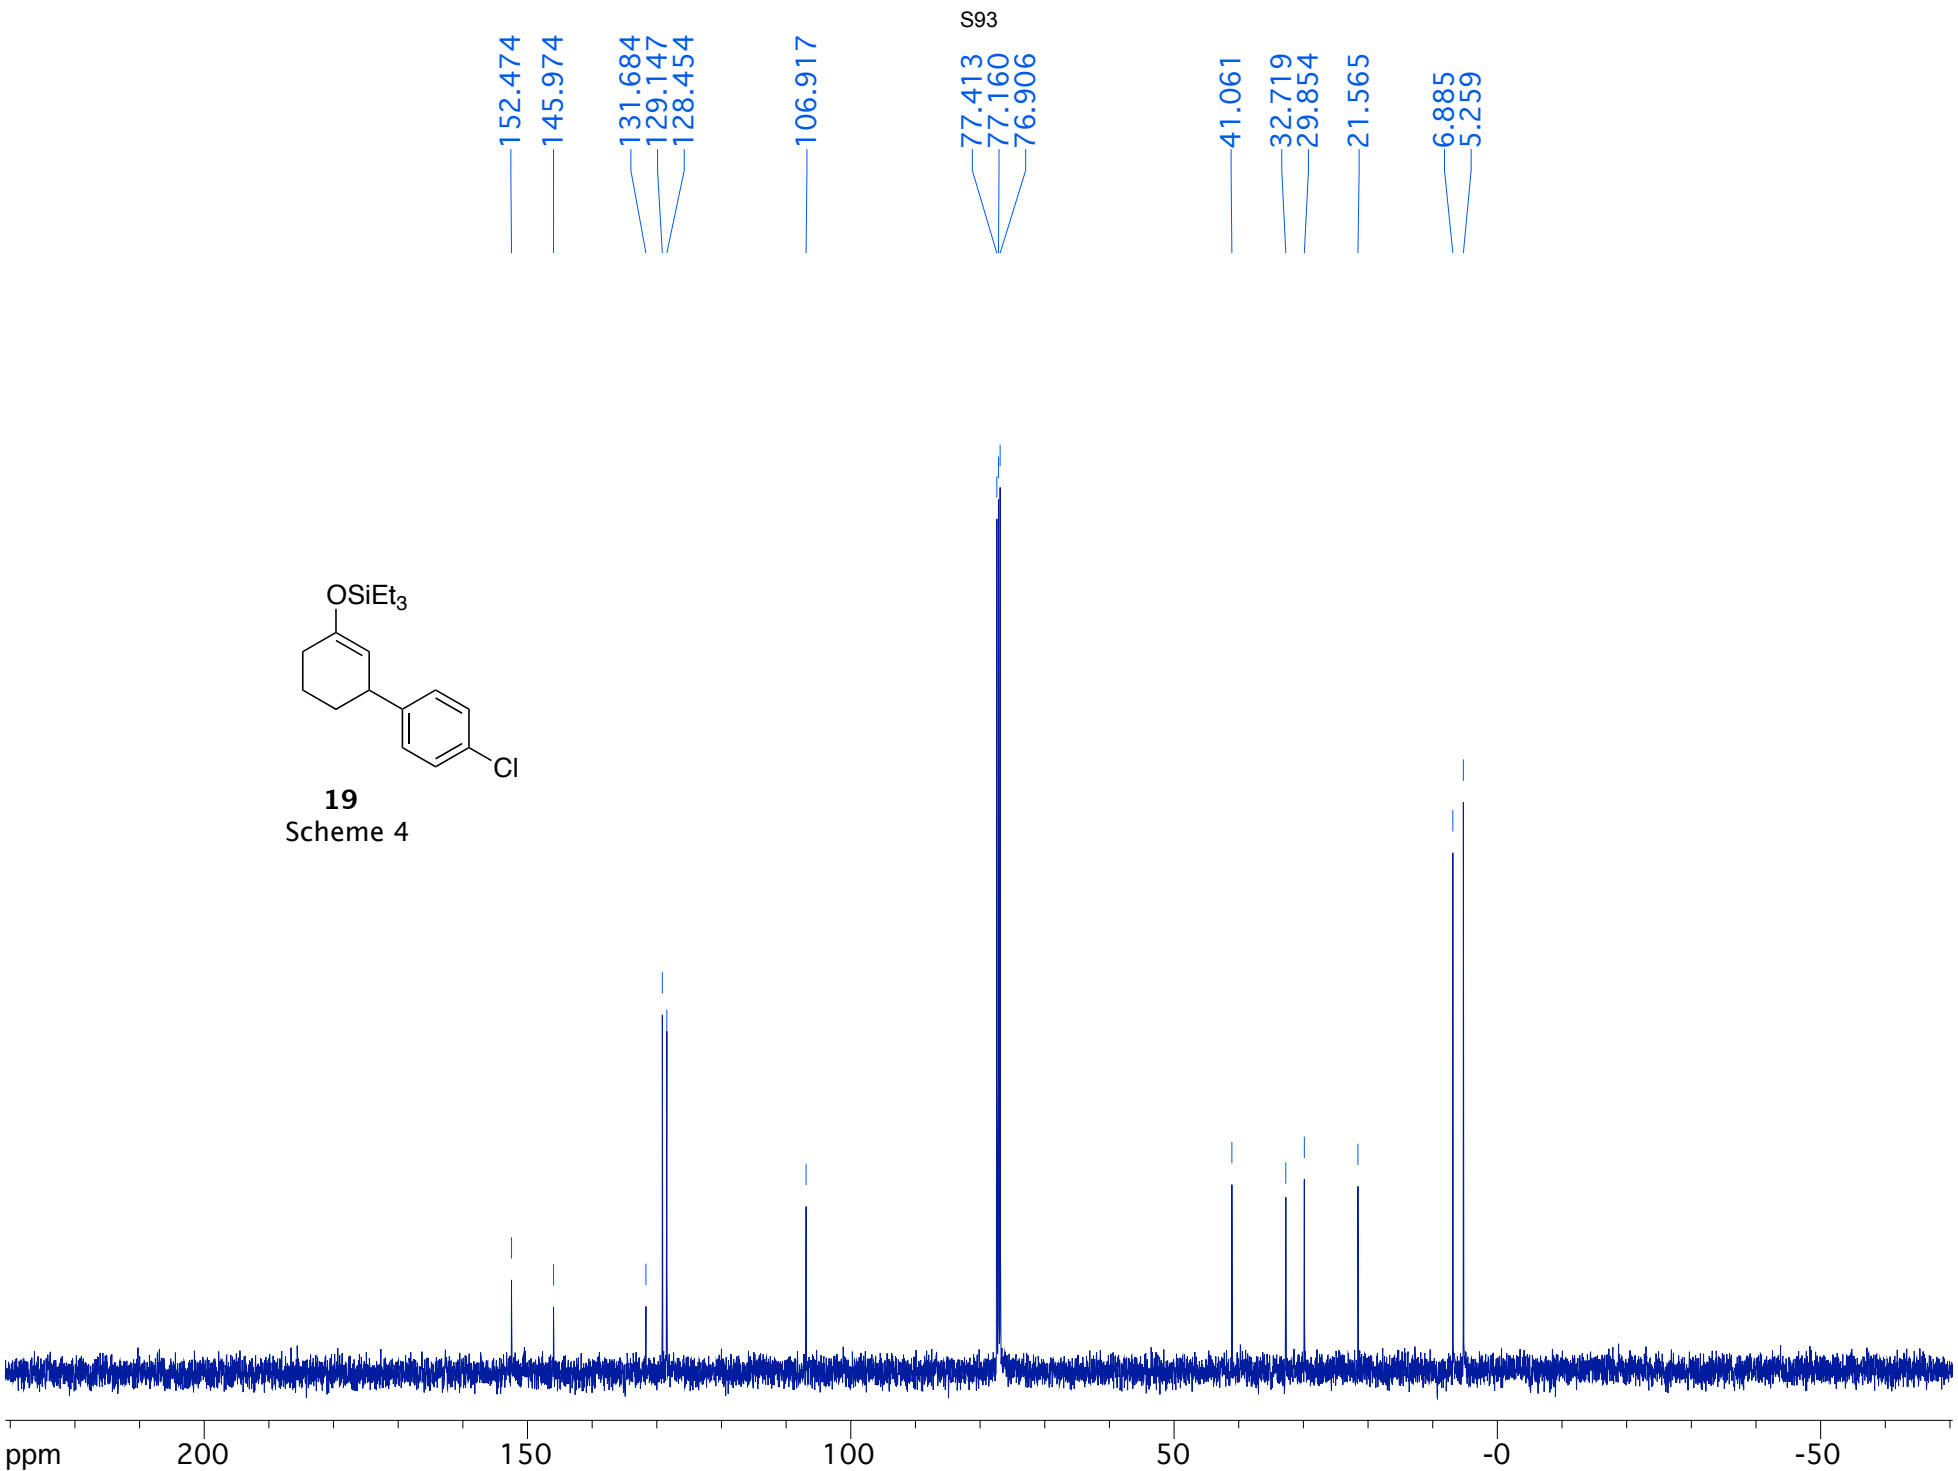

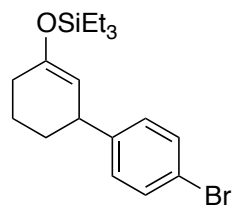

**20**  
Scheme 4

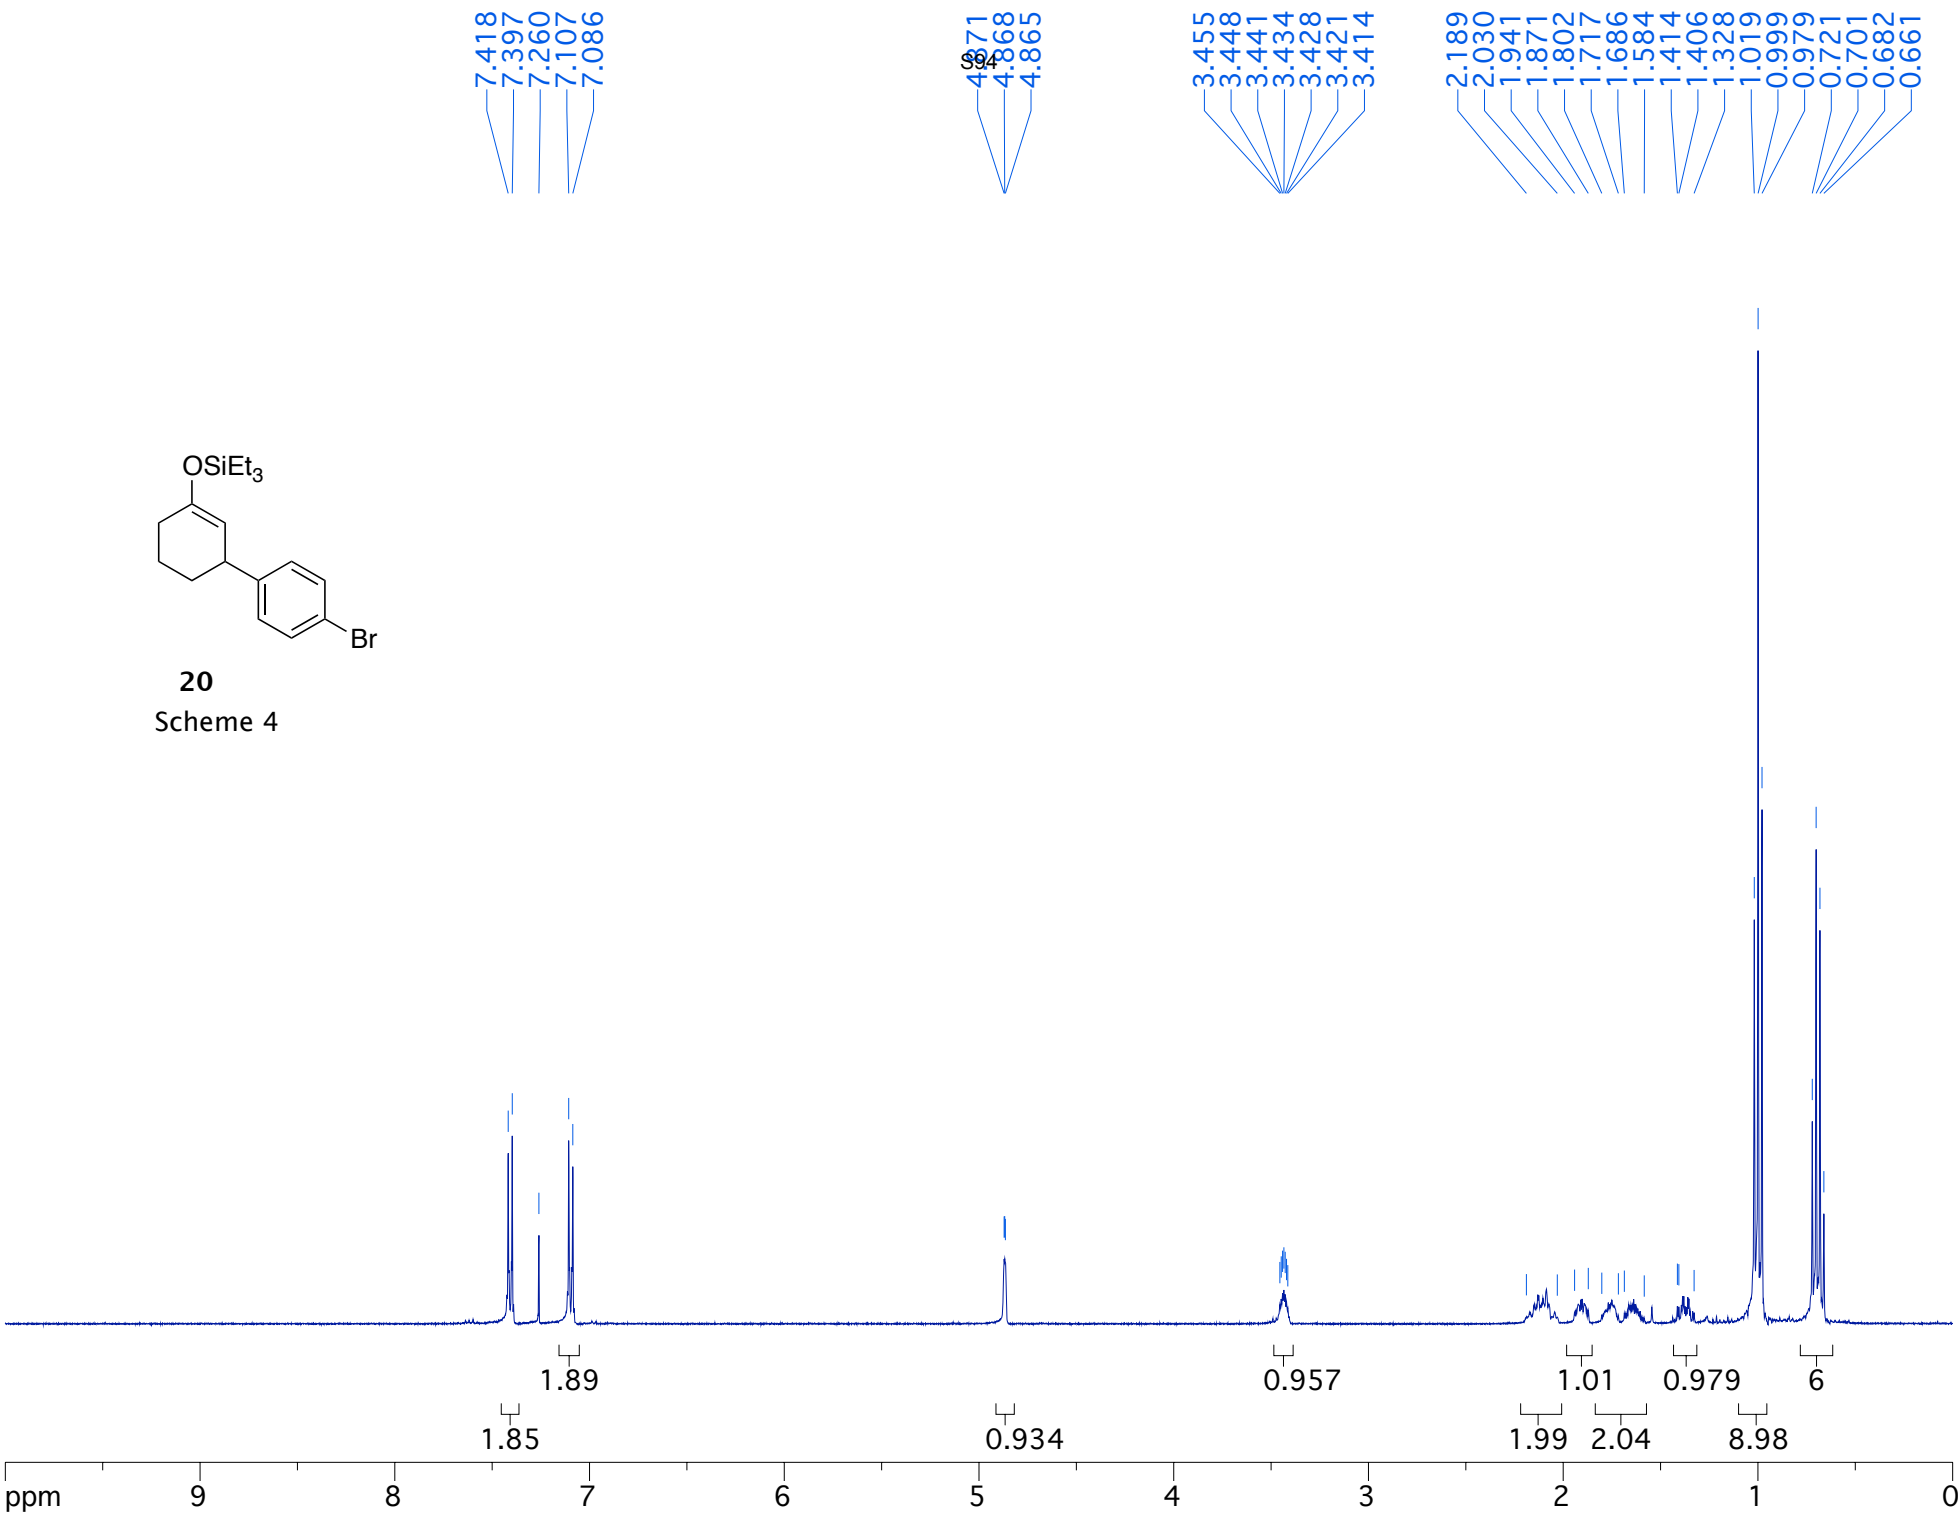

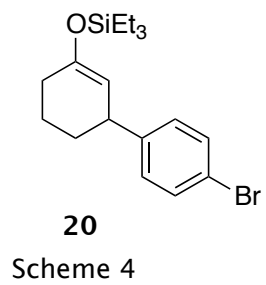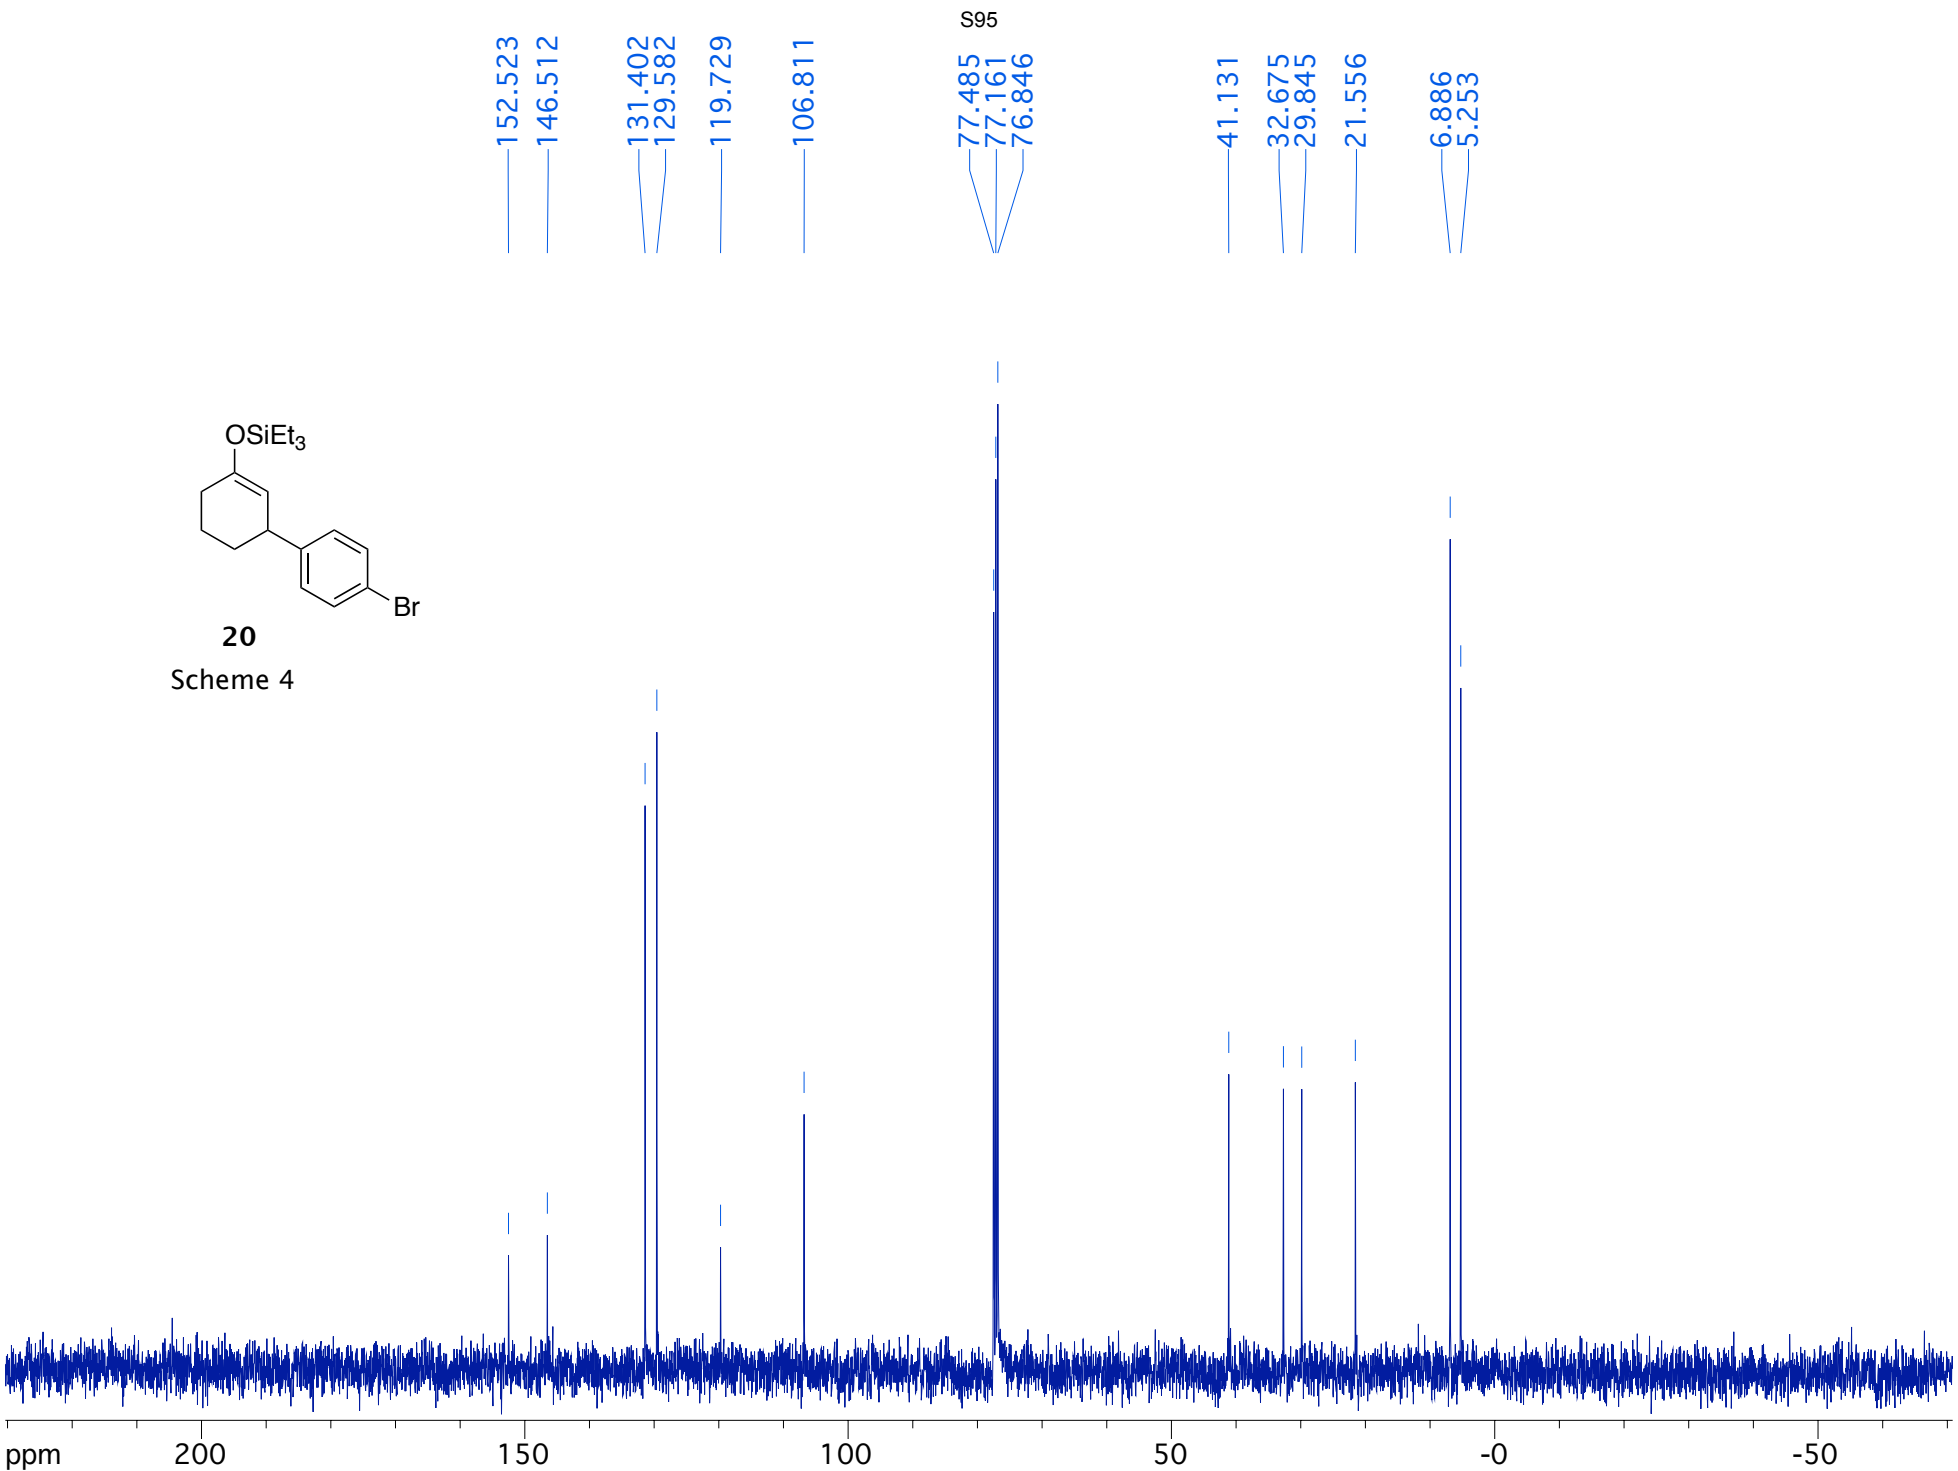

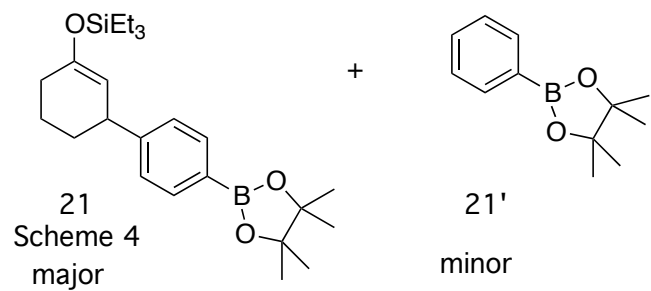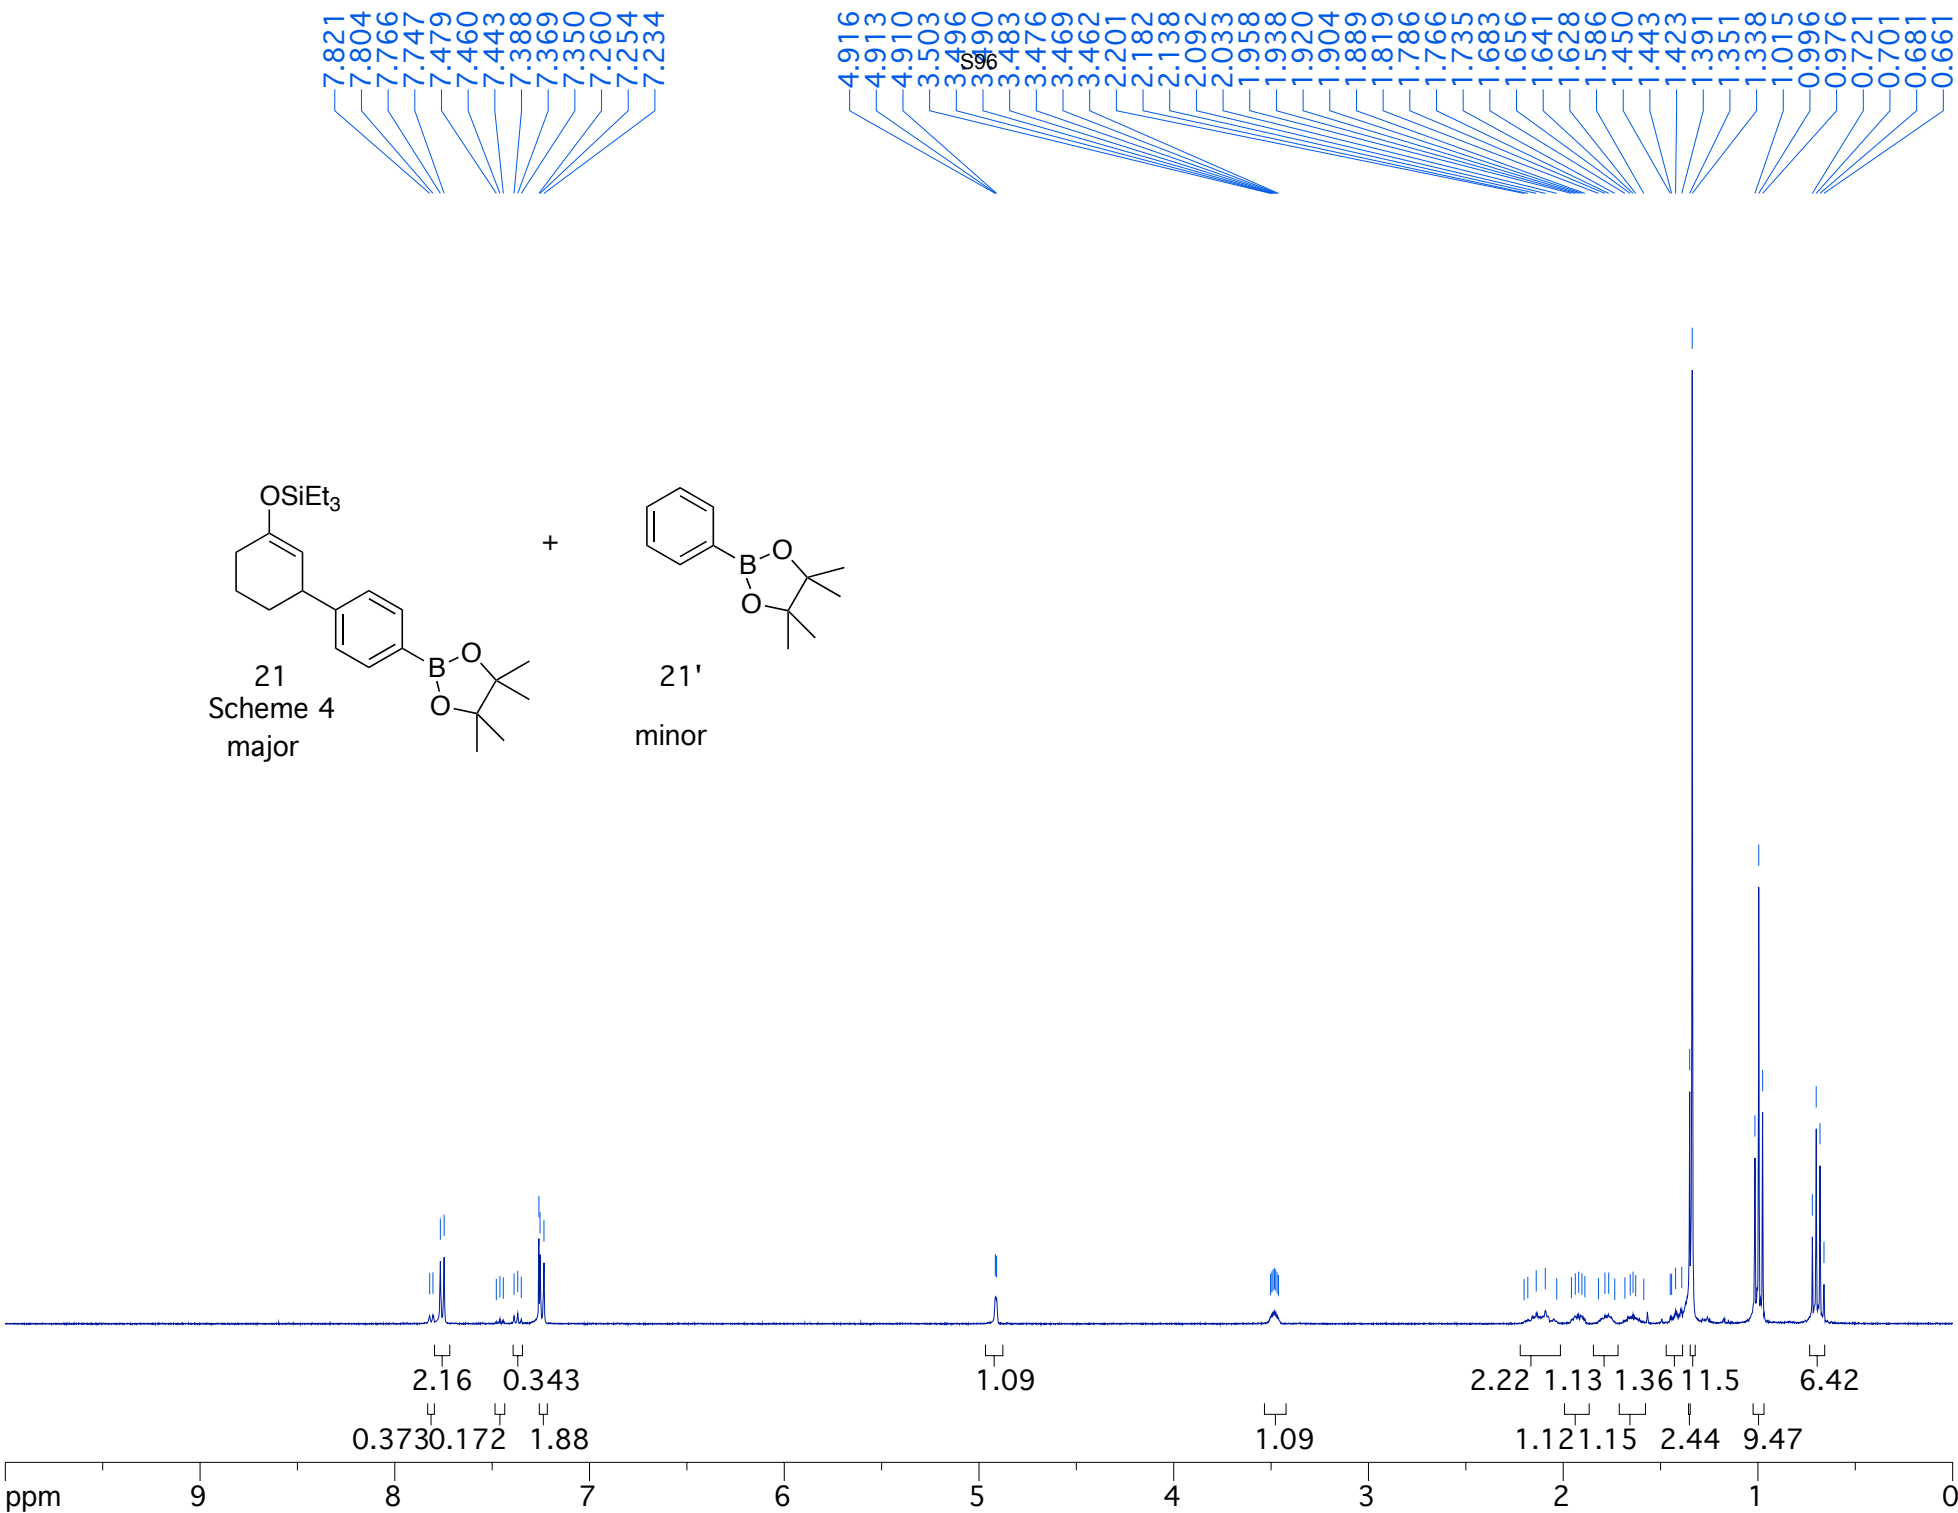

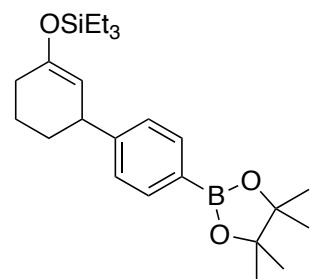

**21**  
Scheme 4

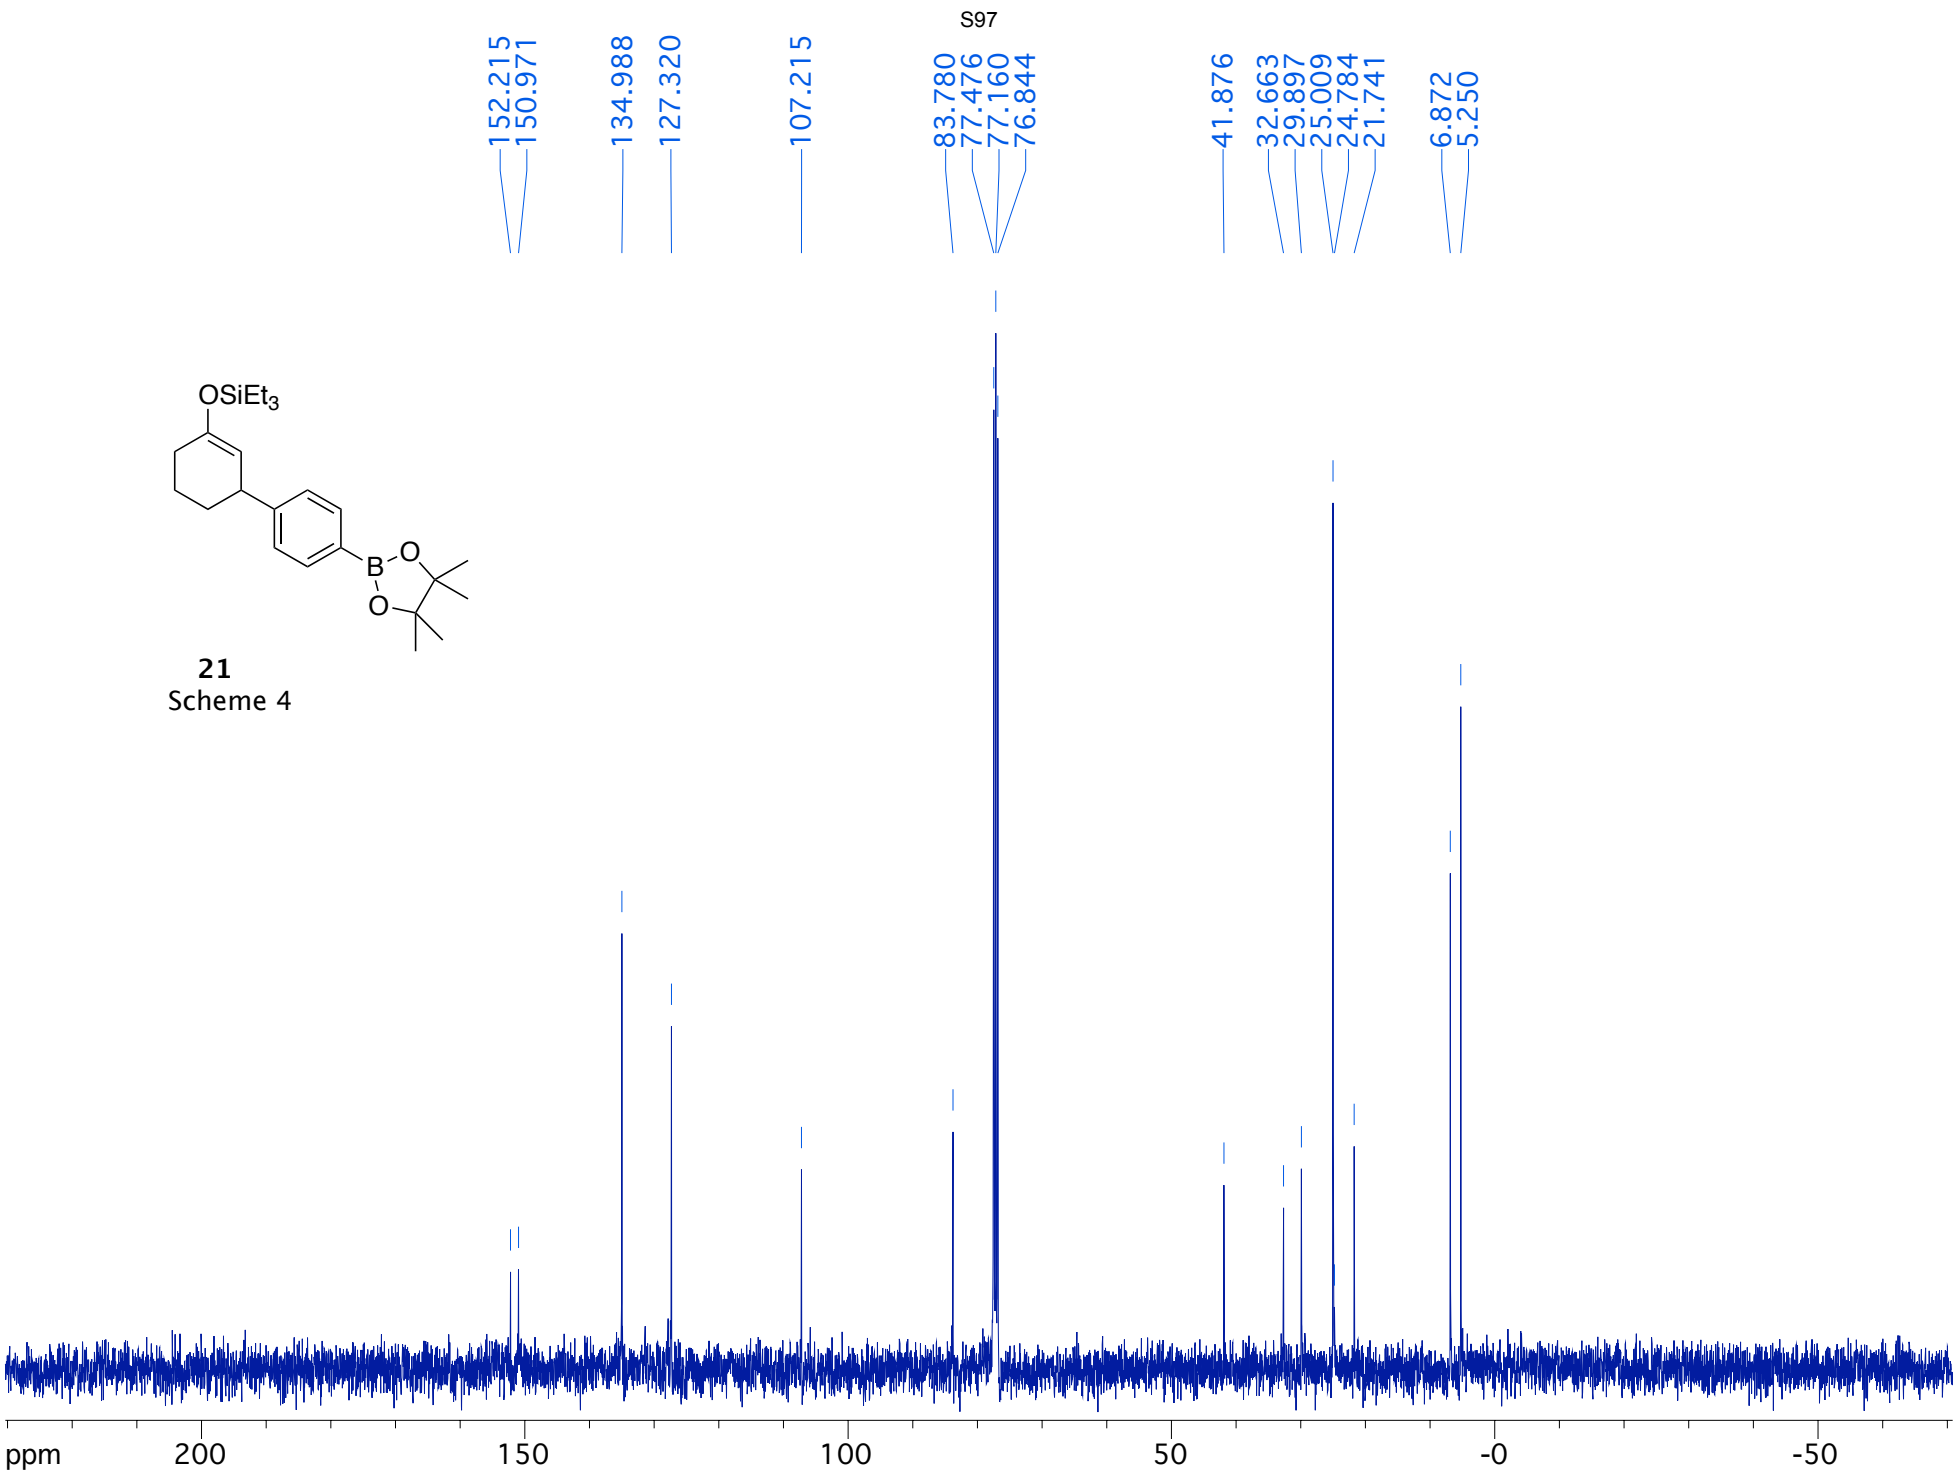

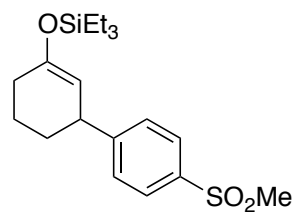

22

Scheme 4

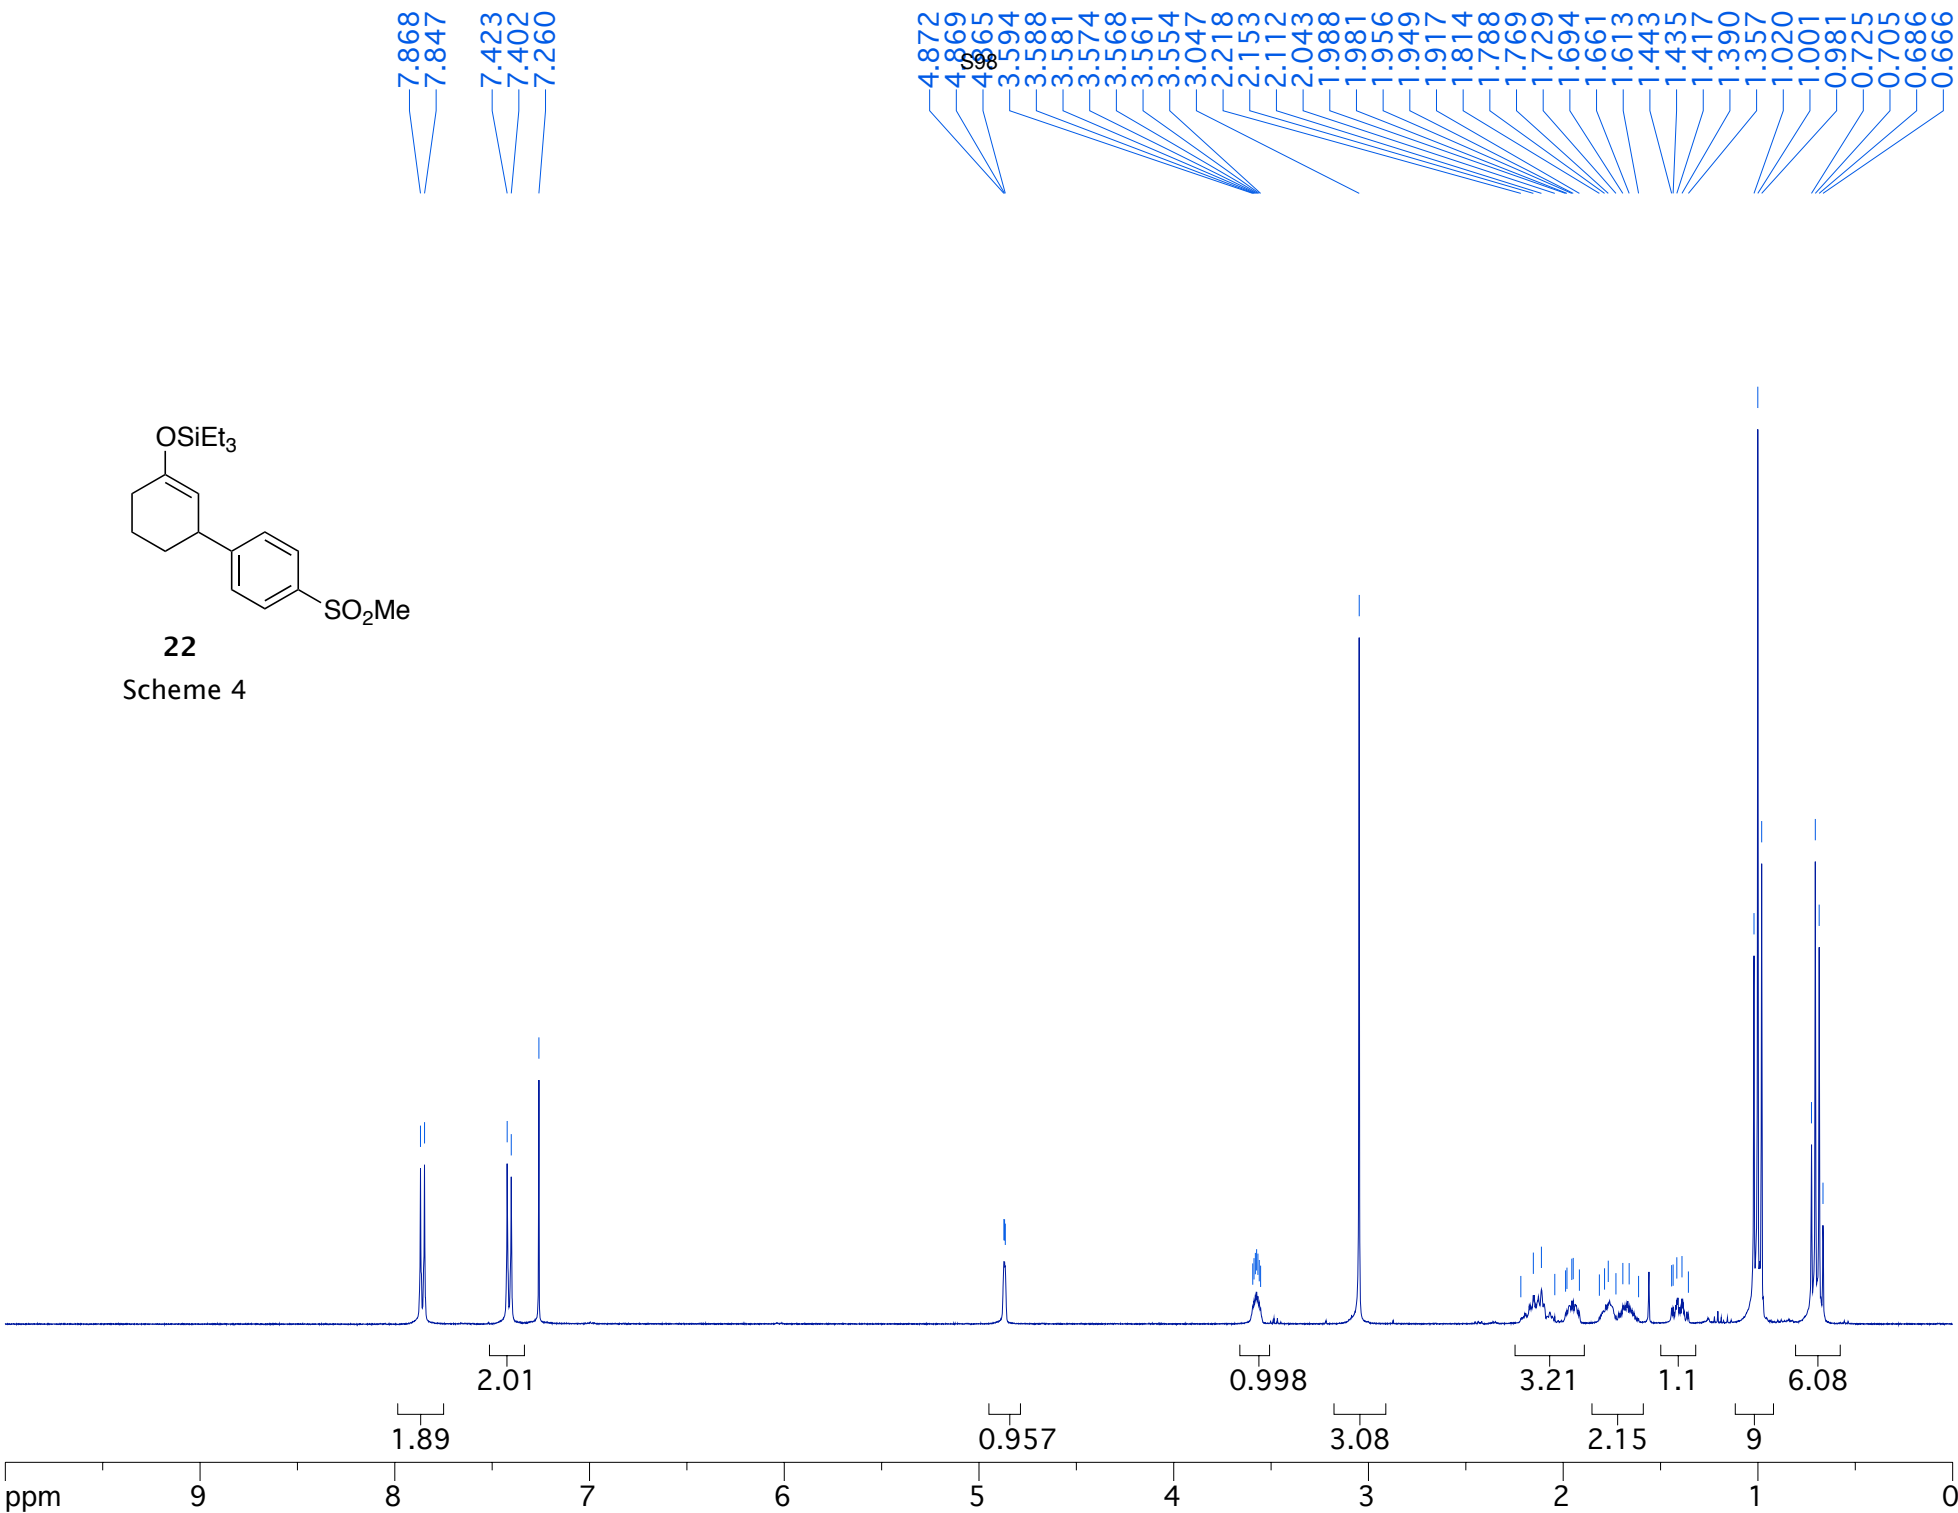



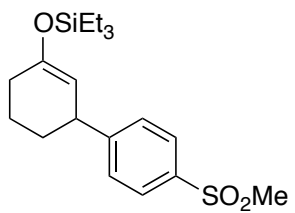

**22**  
Scheme 4

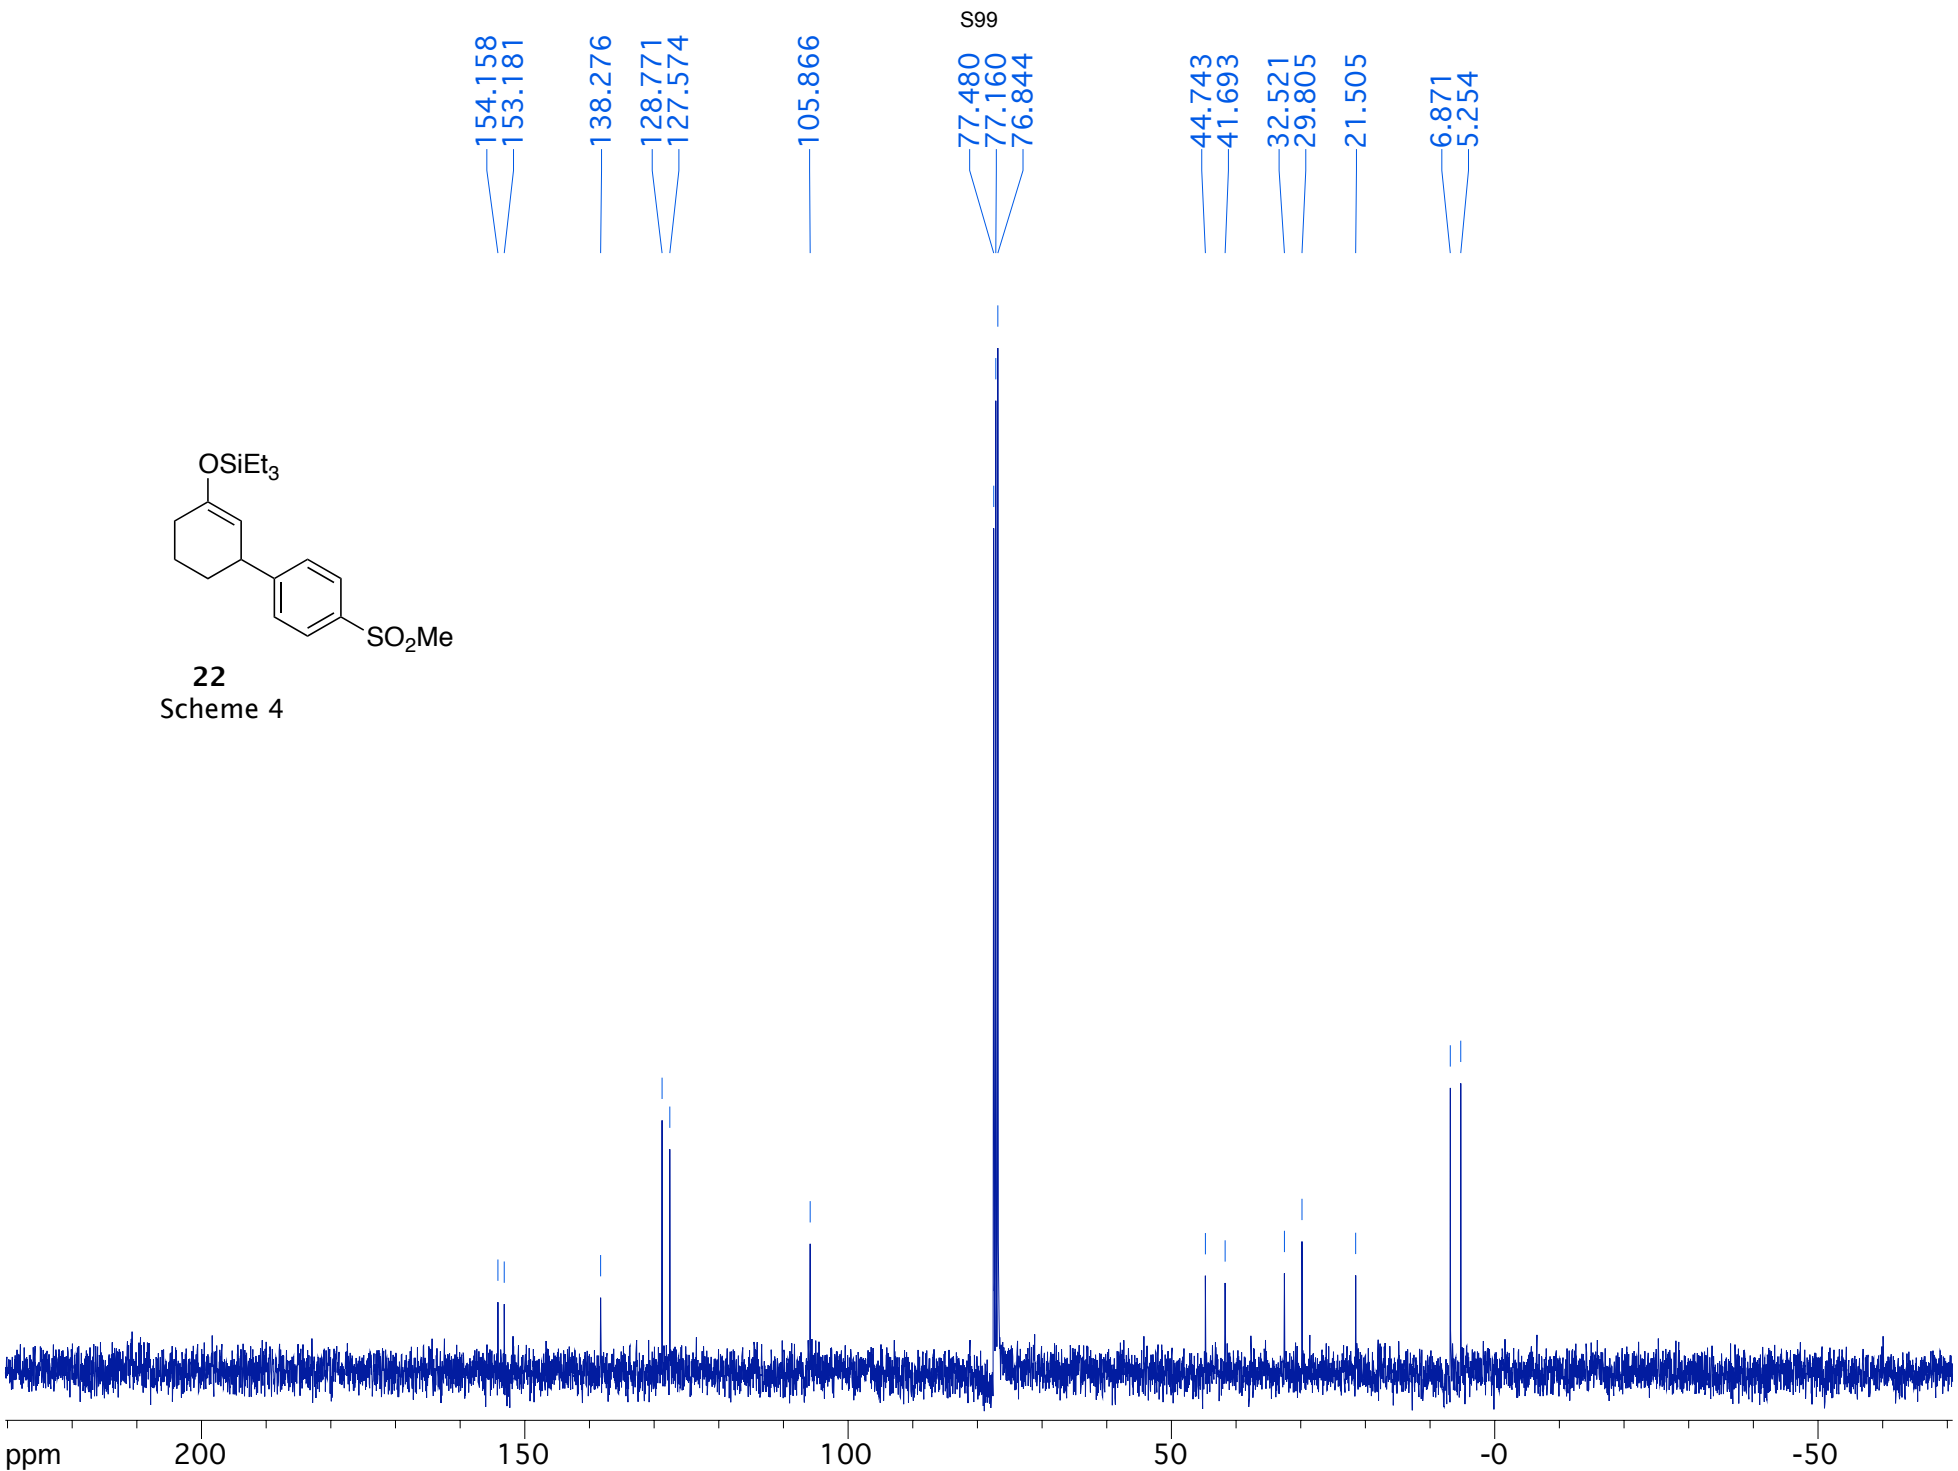

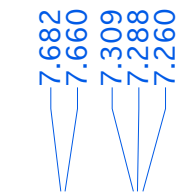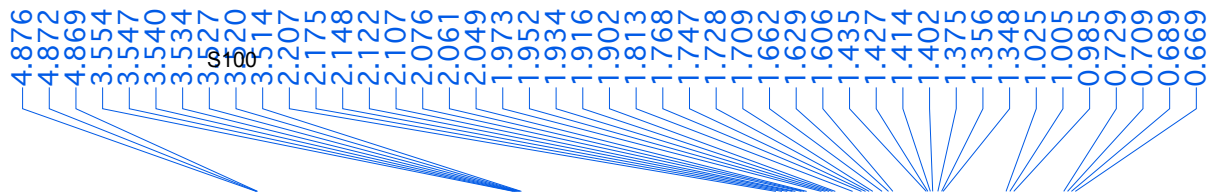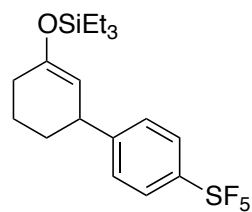

**23**  
Scheme 4

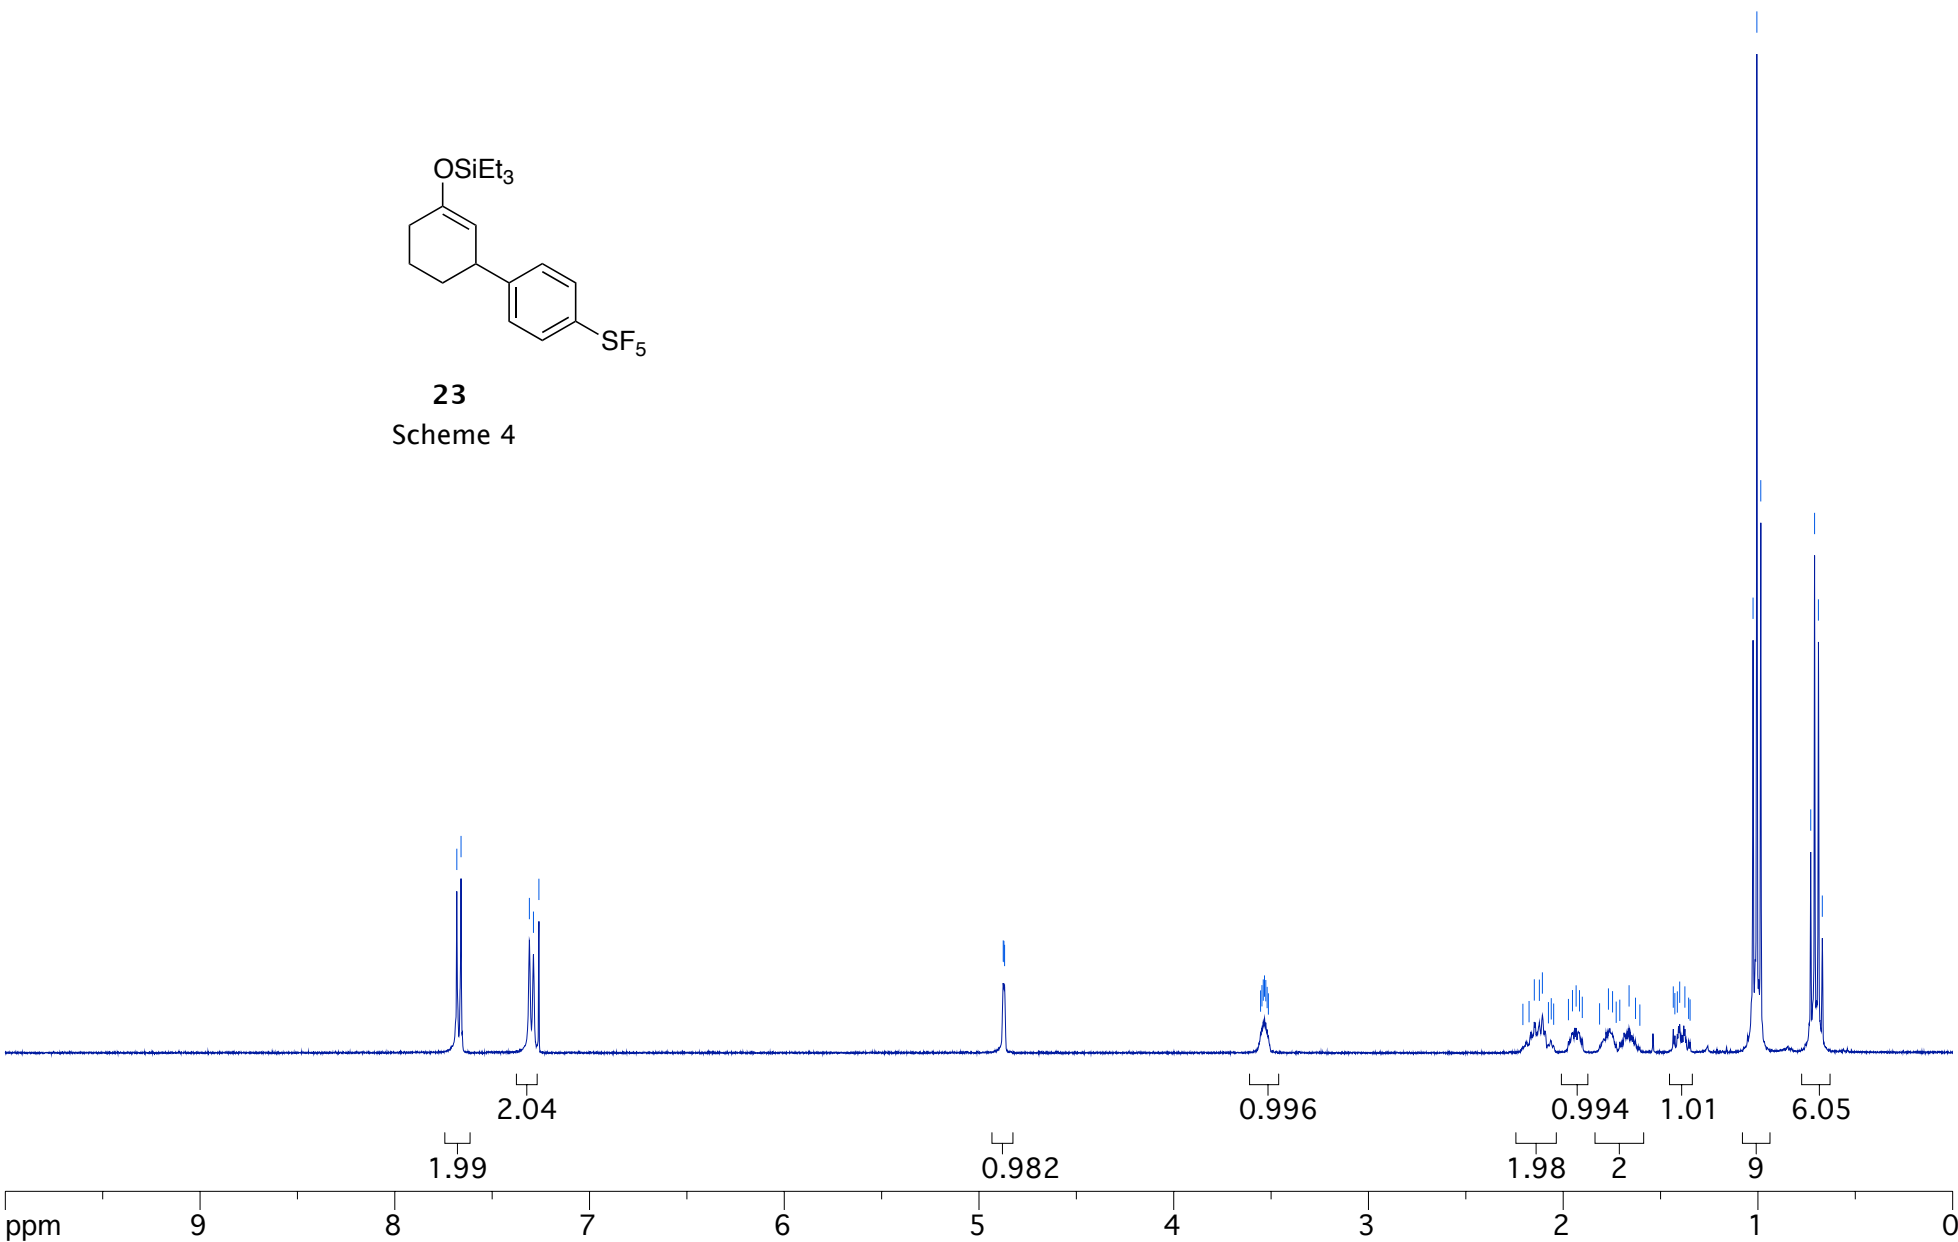

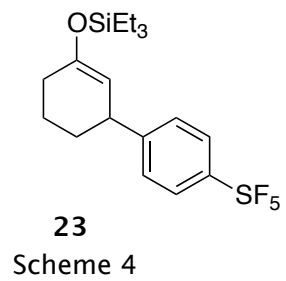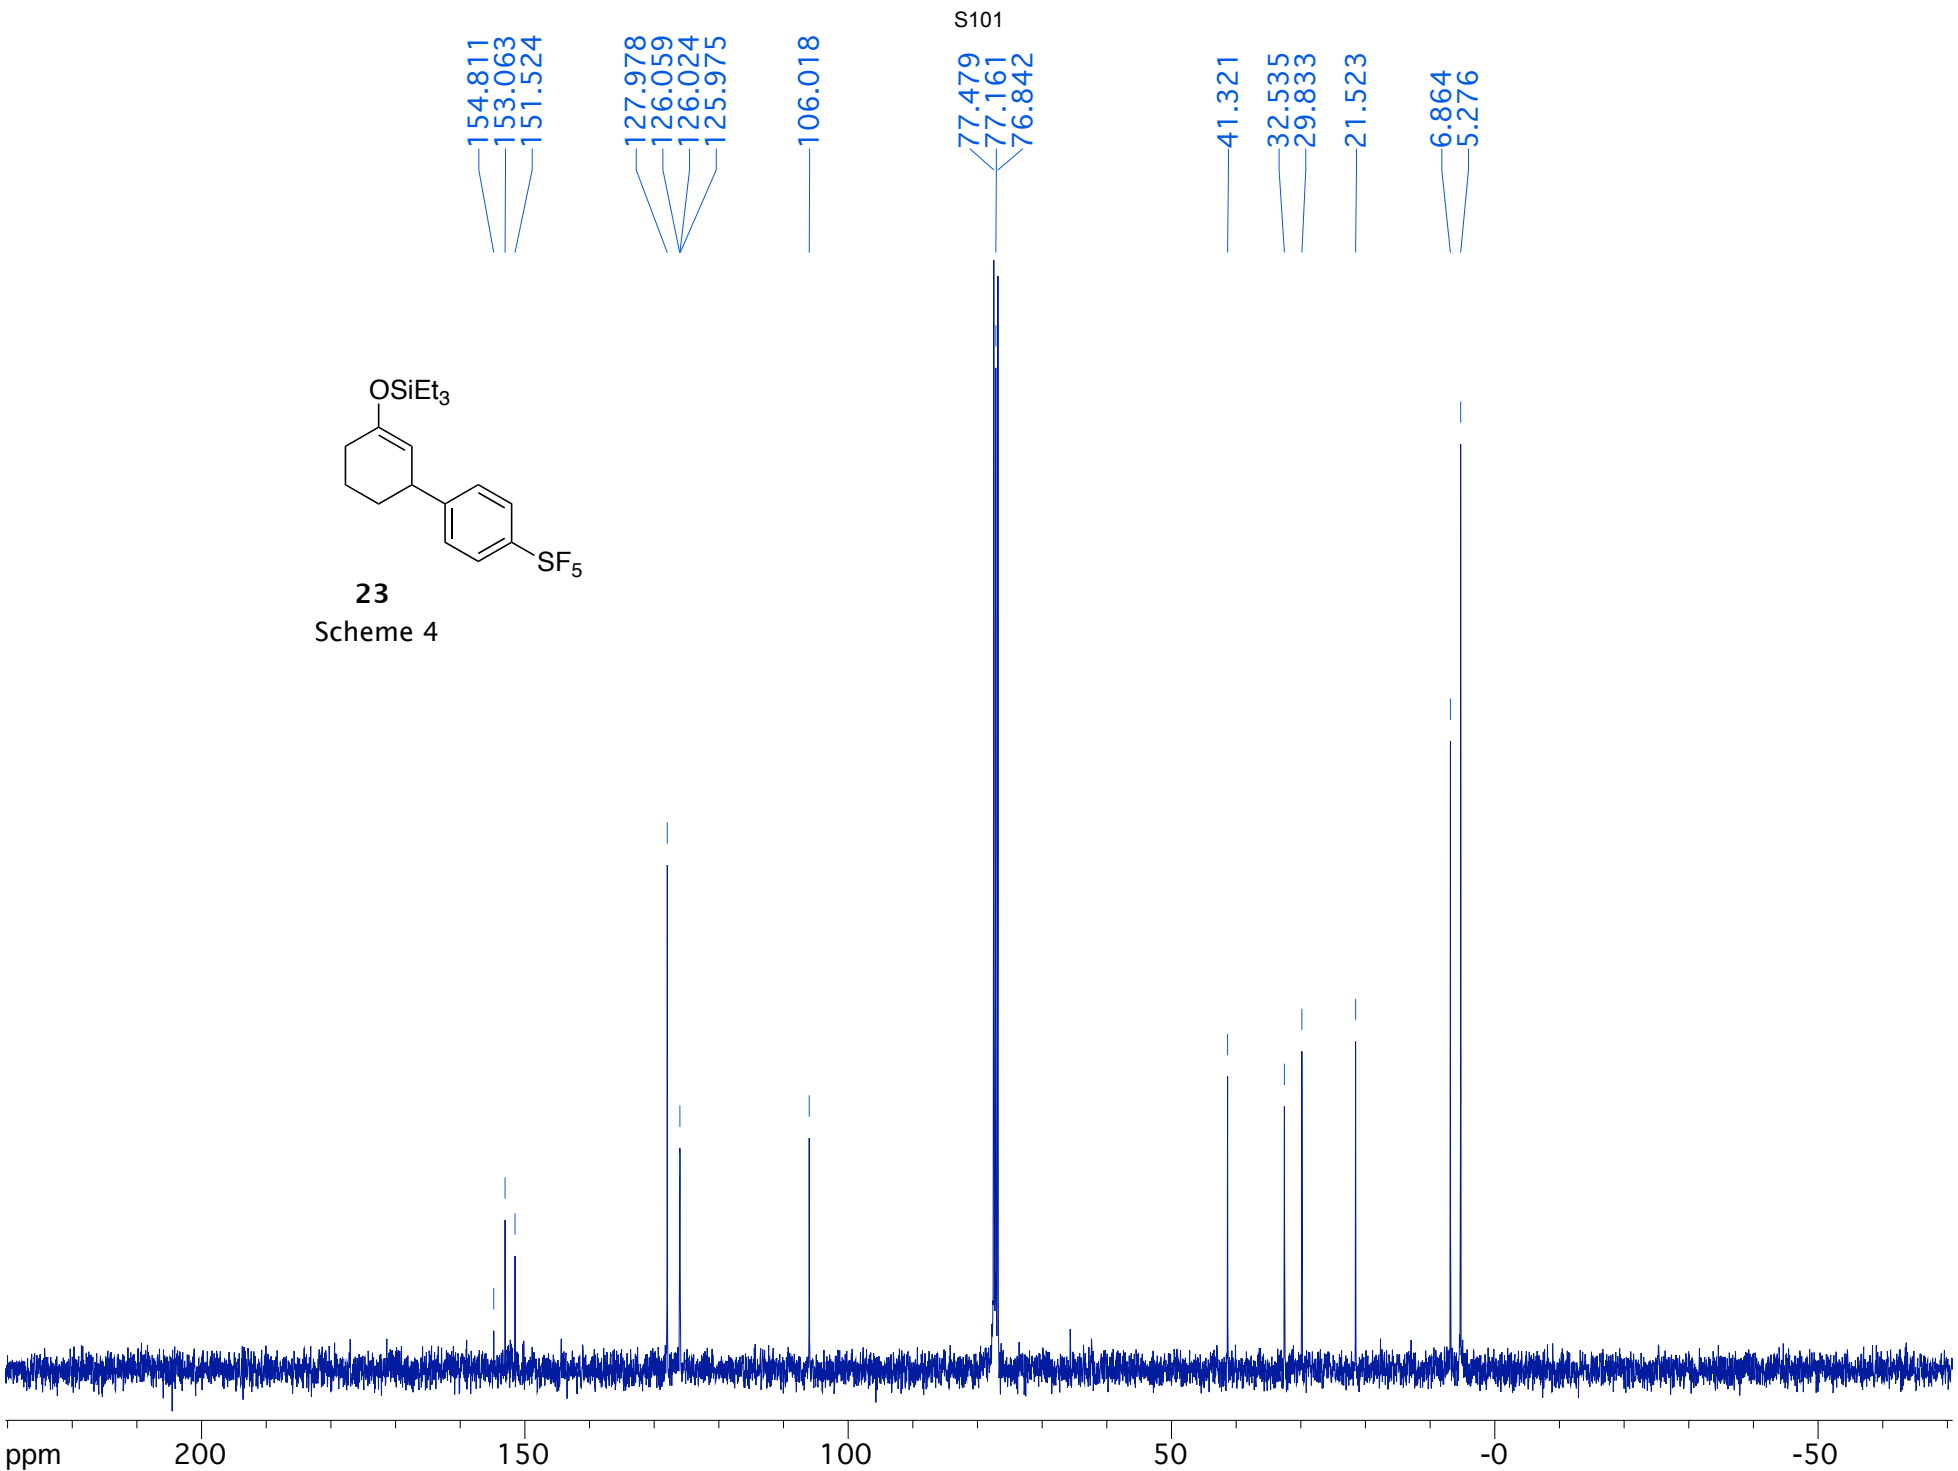



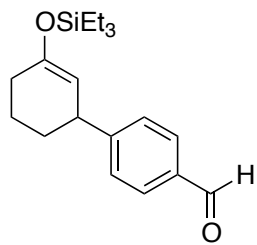

**24**  
Scheme 4

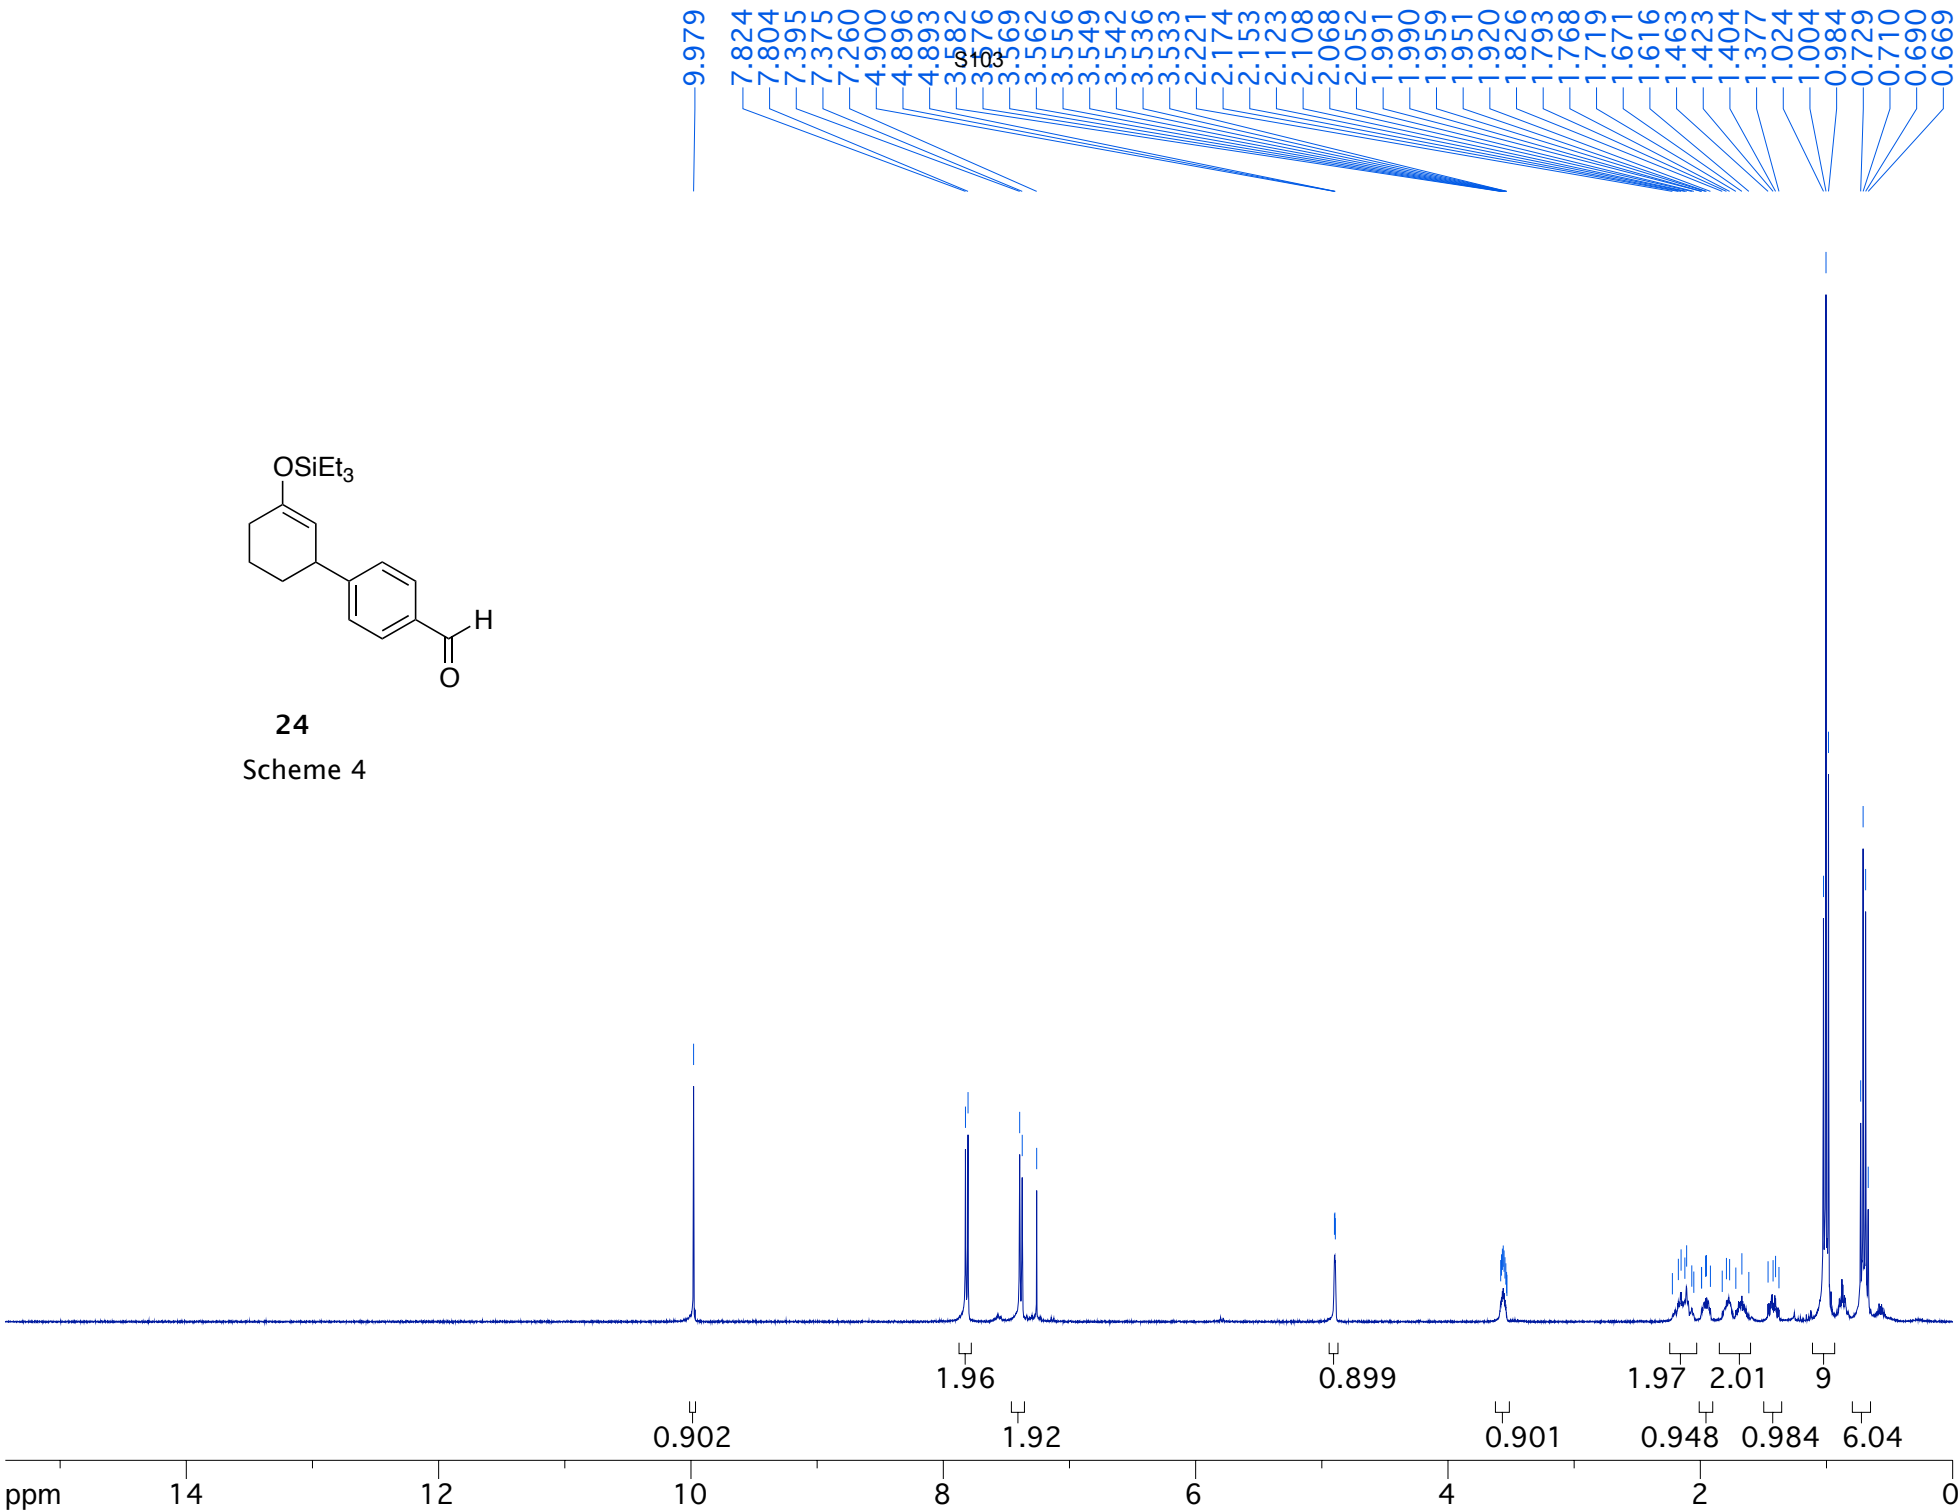

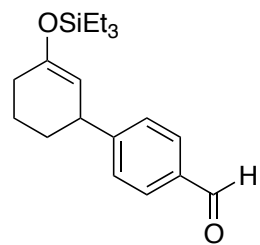

24  
Scheme 4

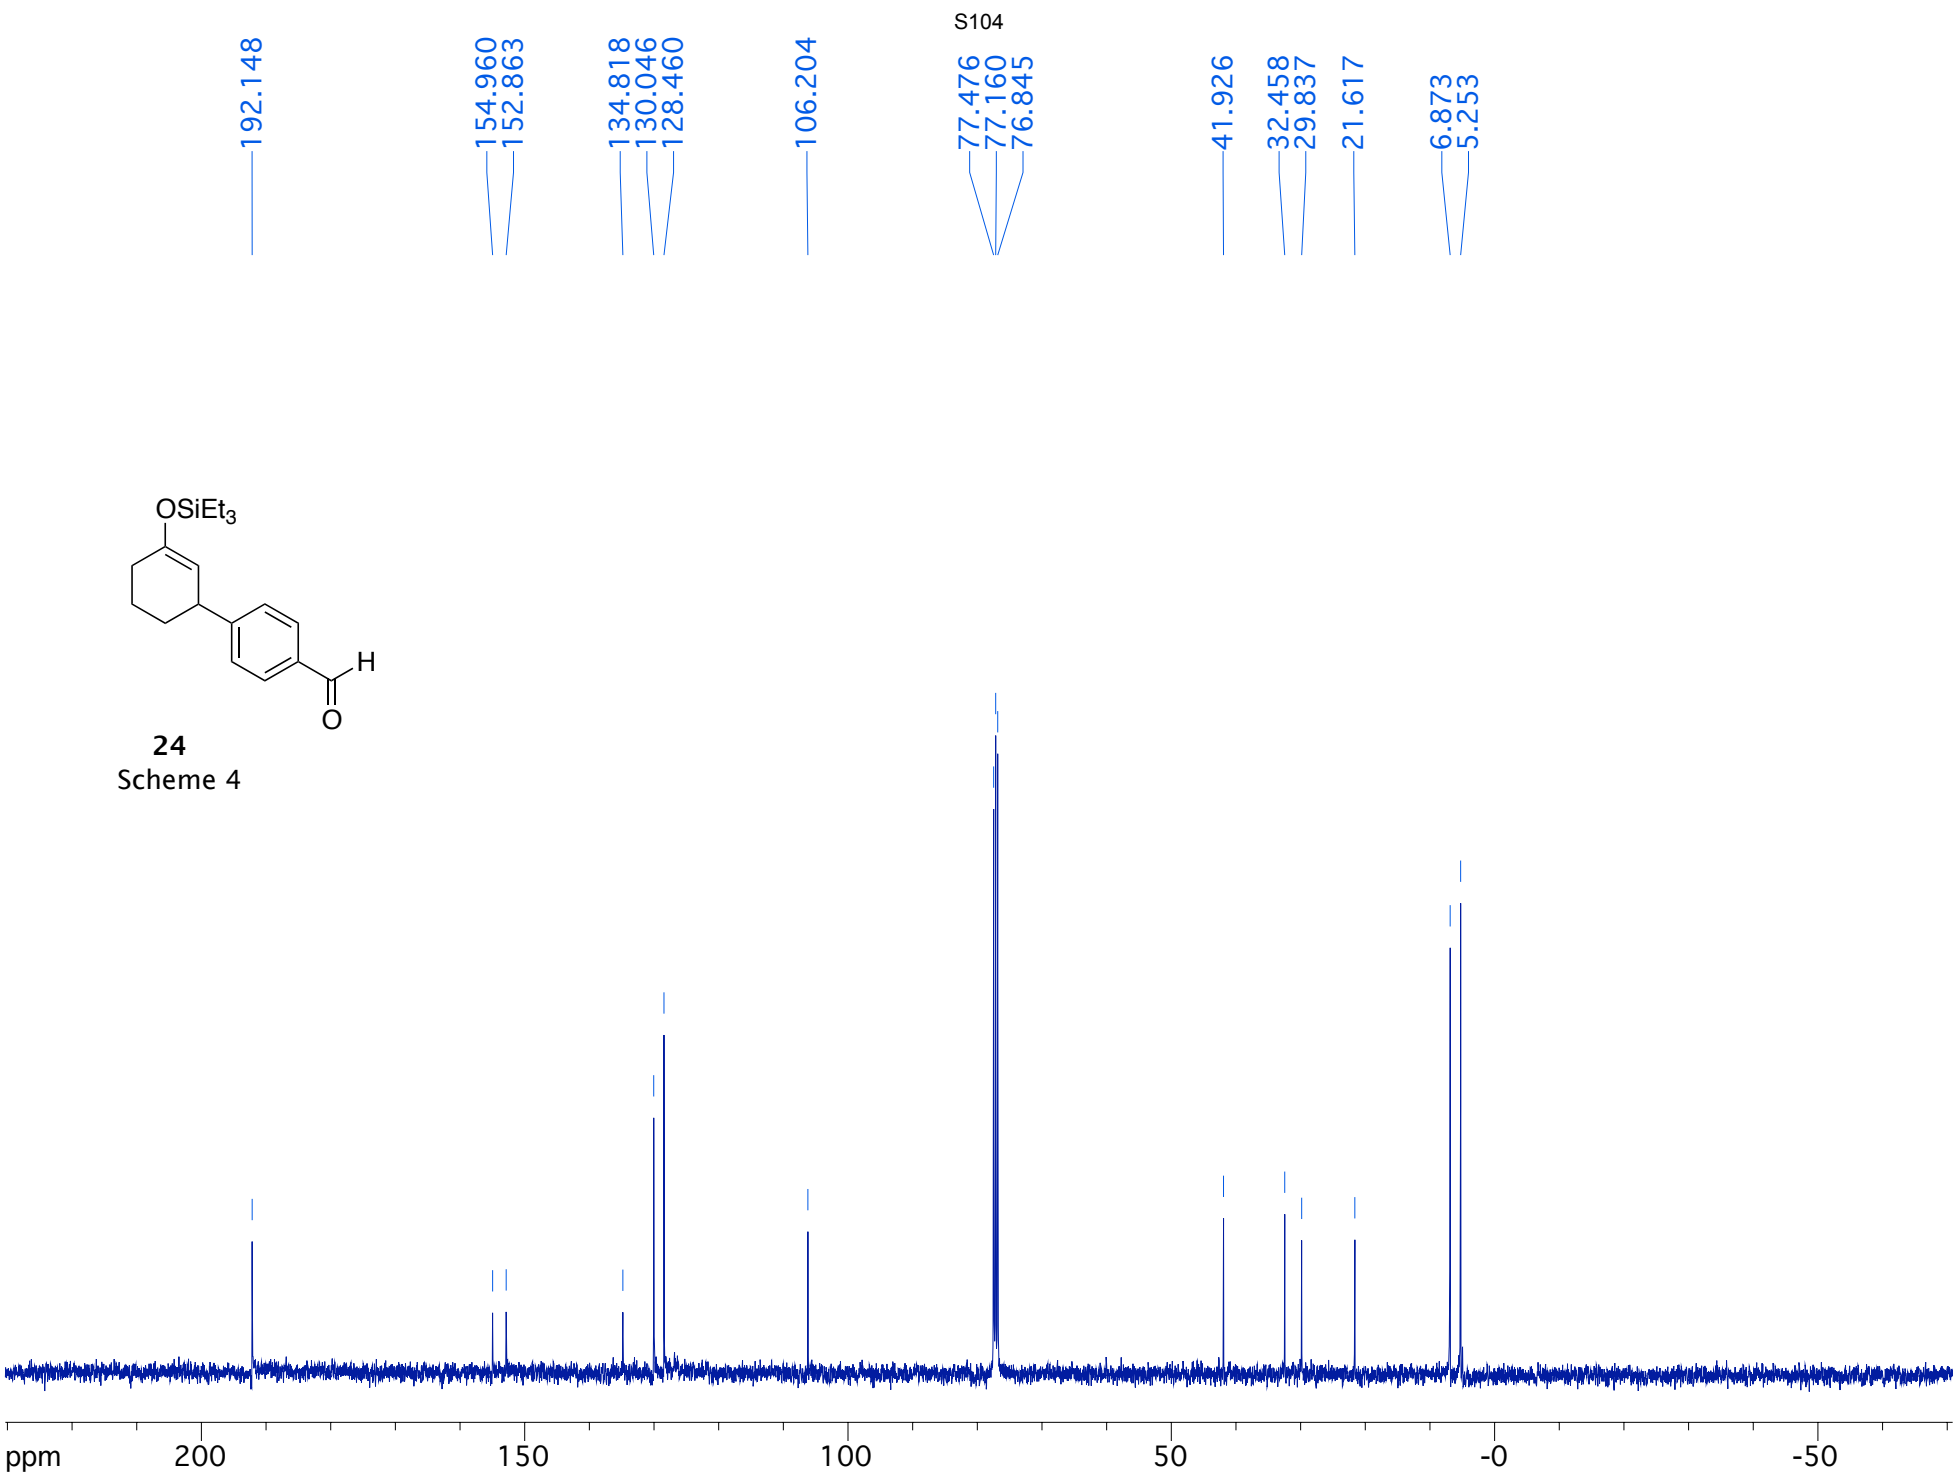

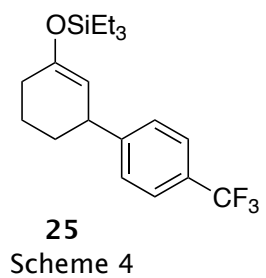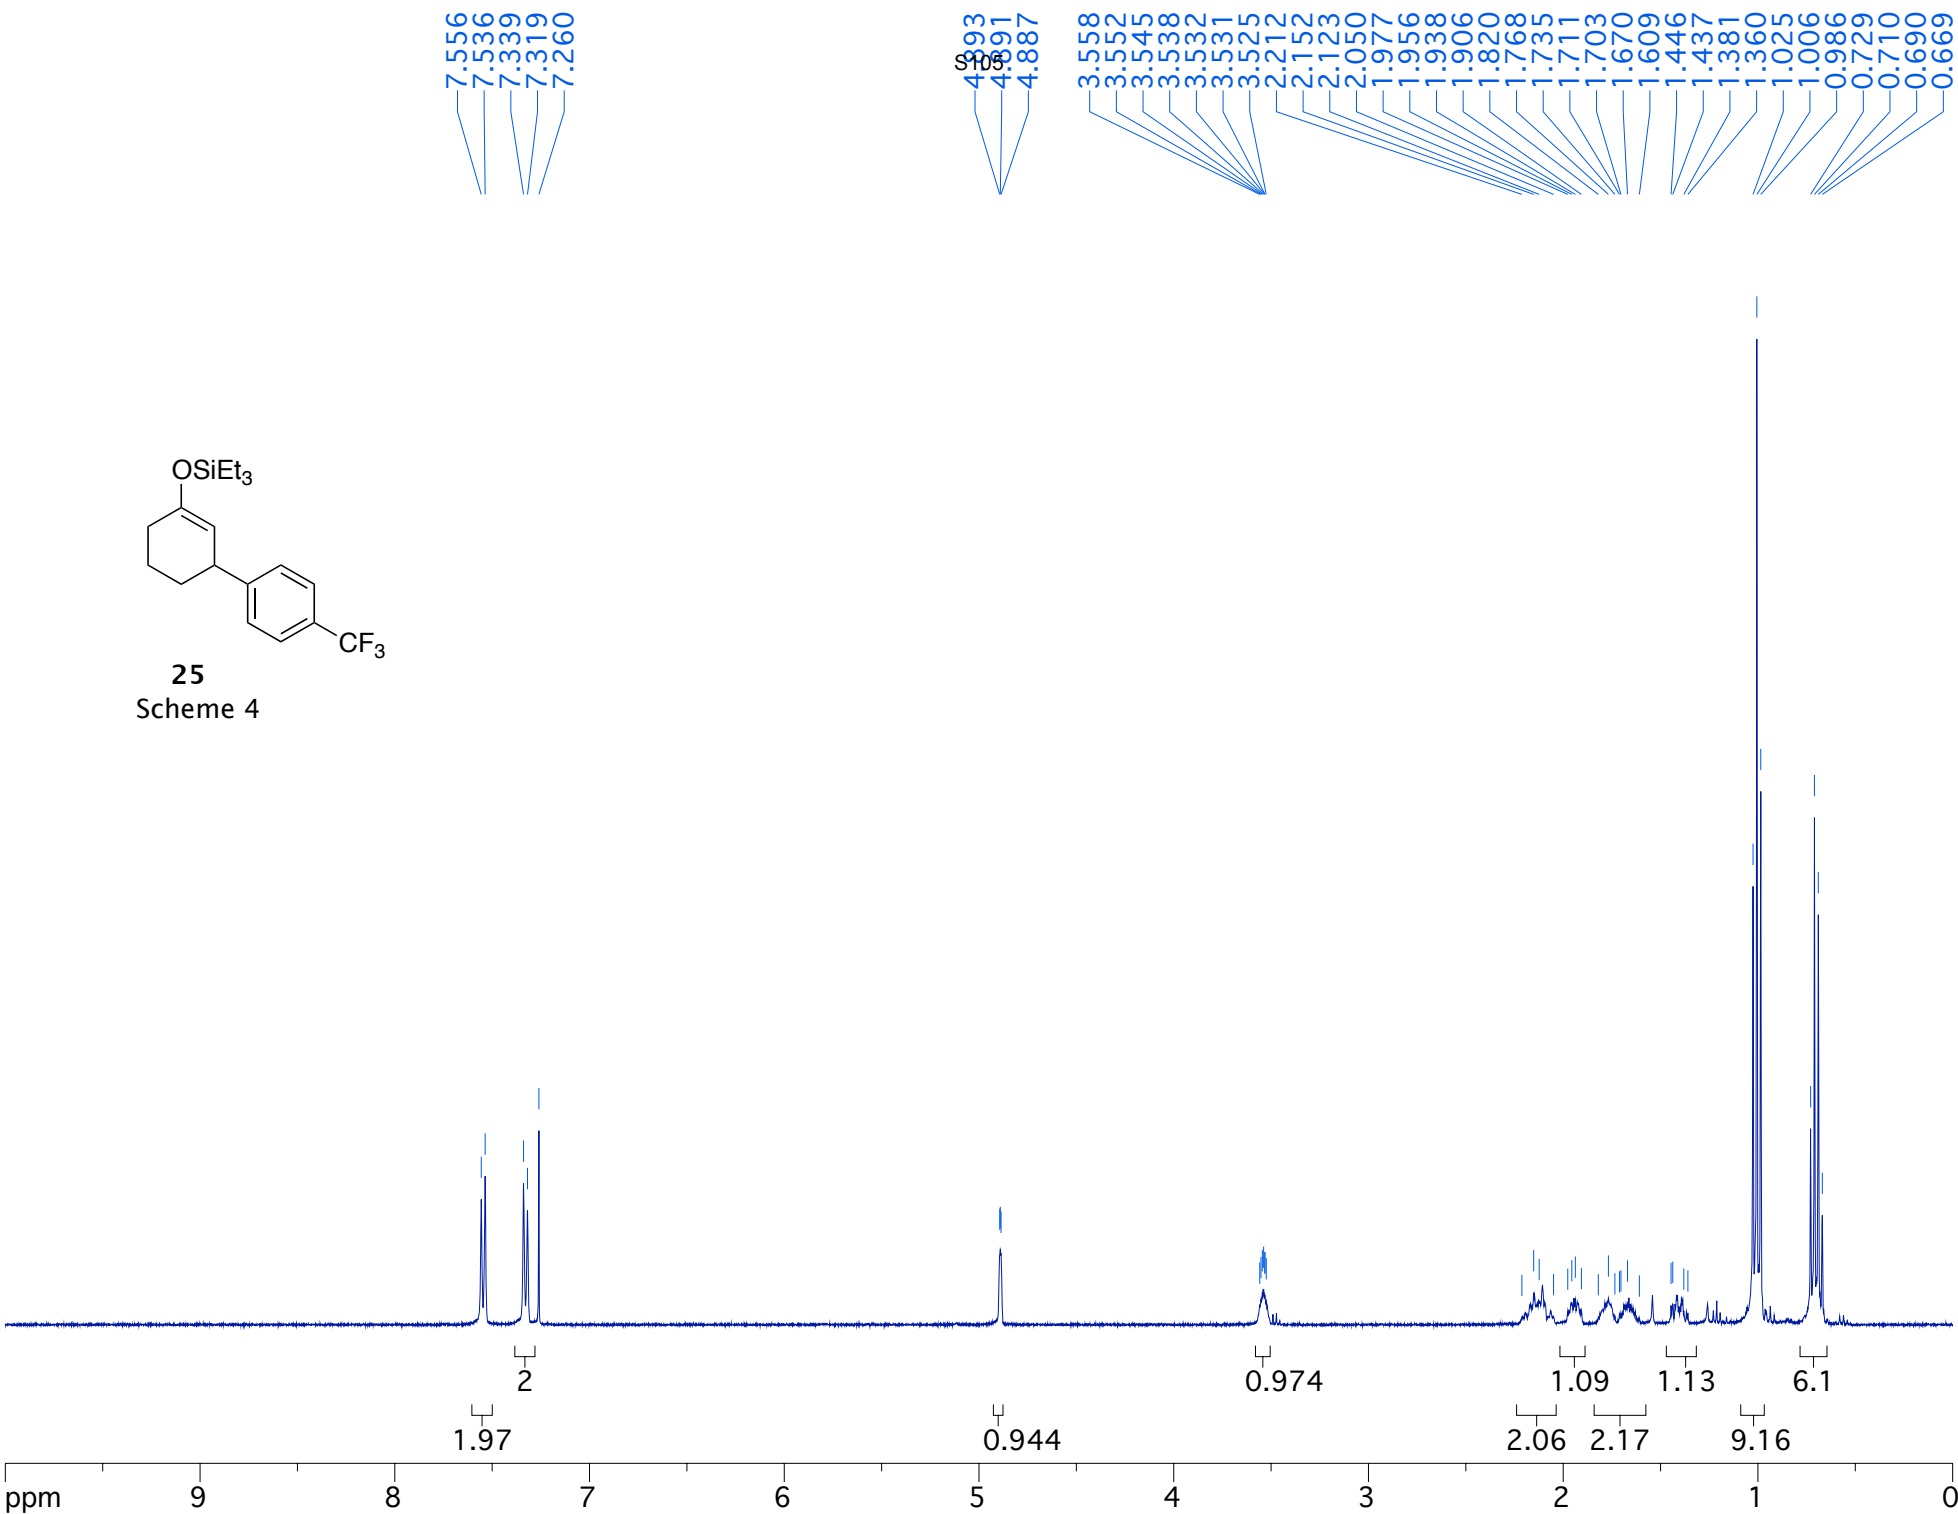

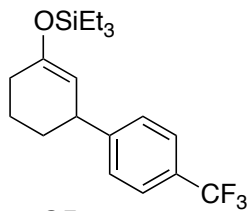

25

Scheme 4

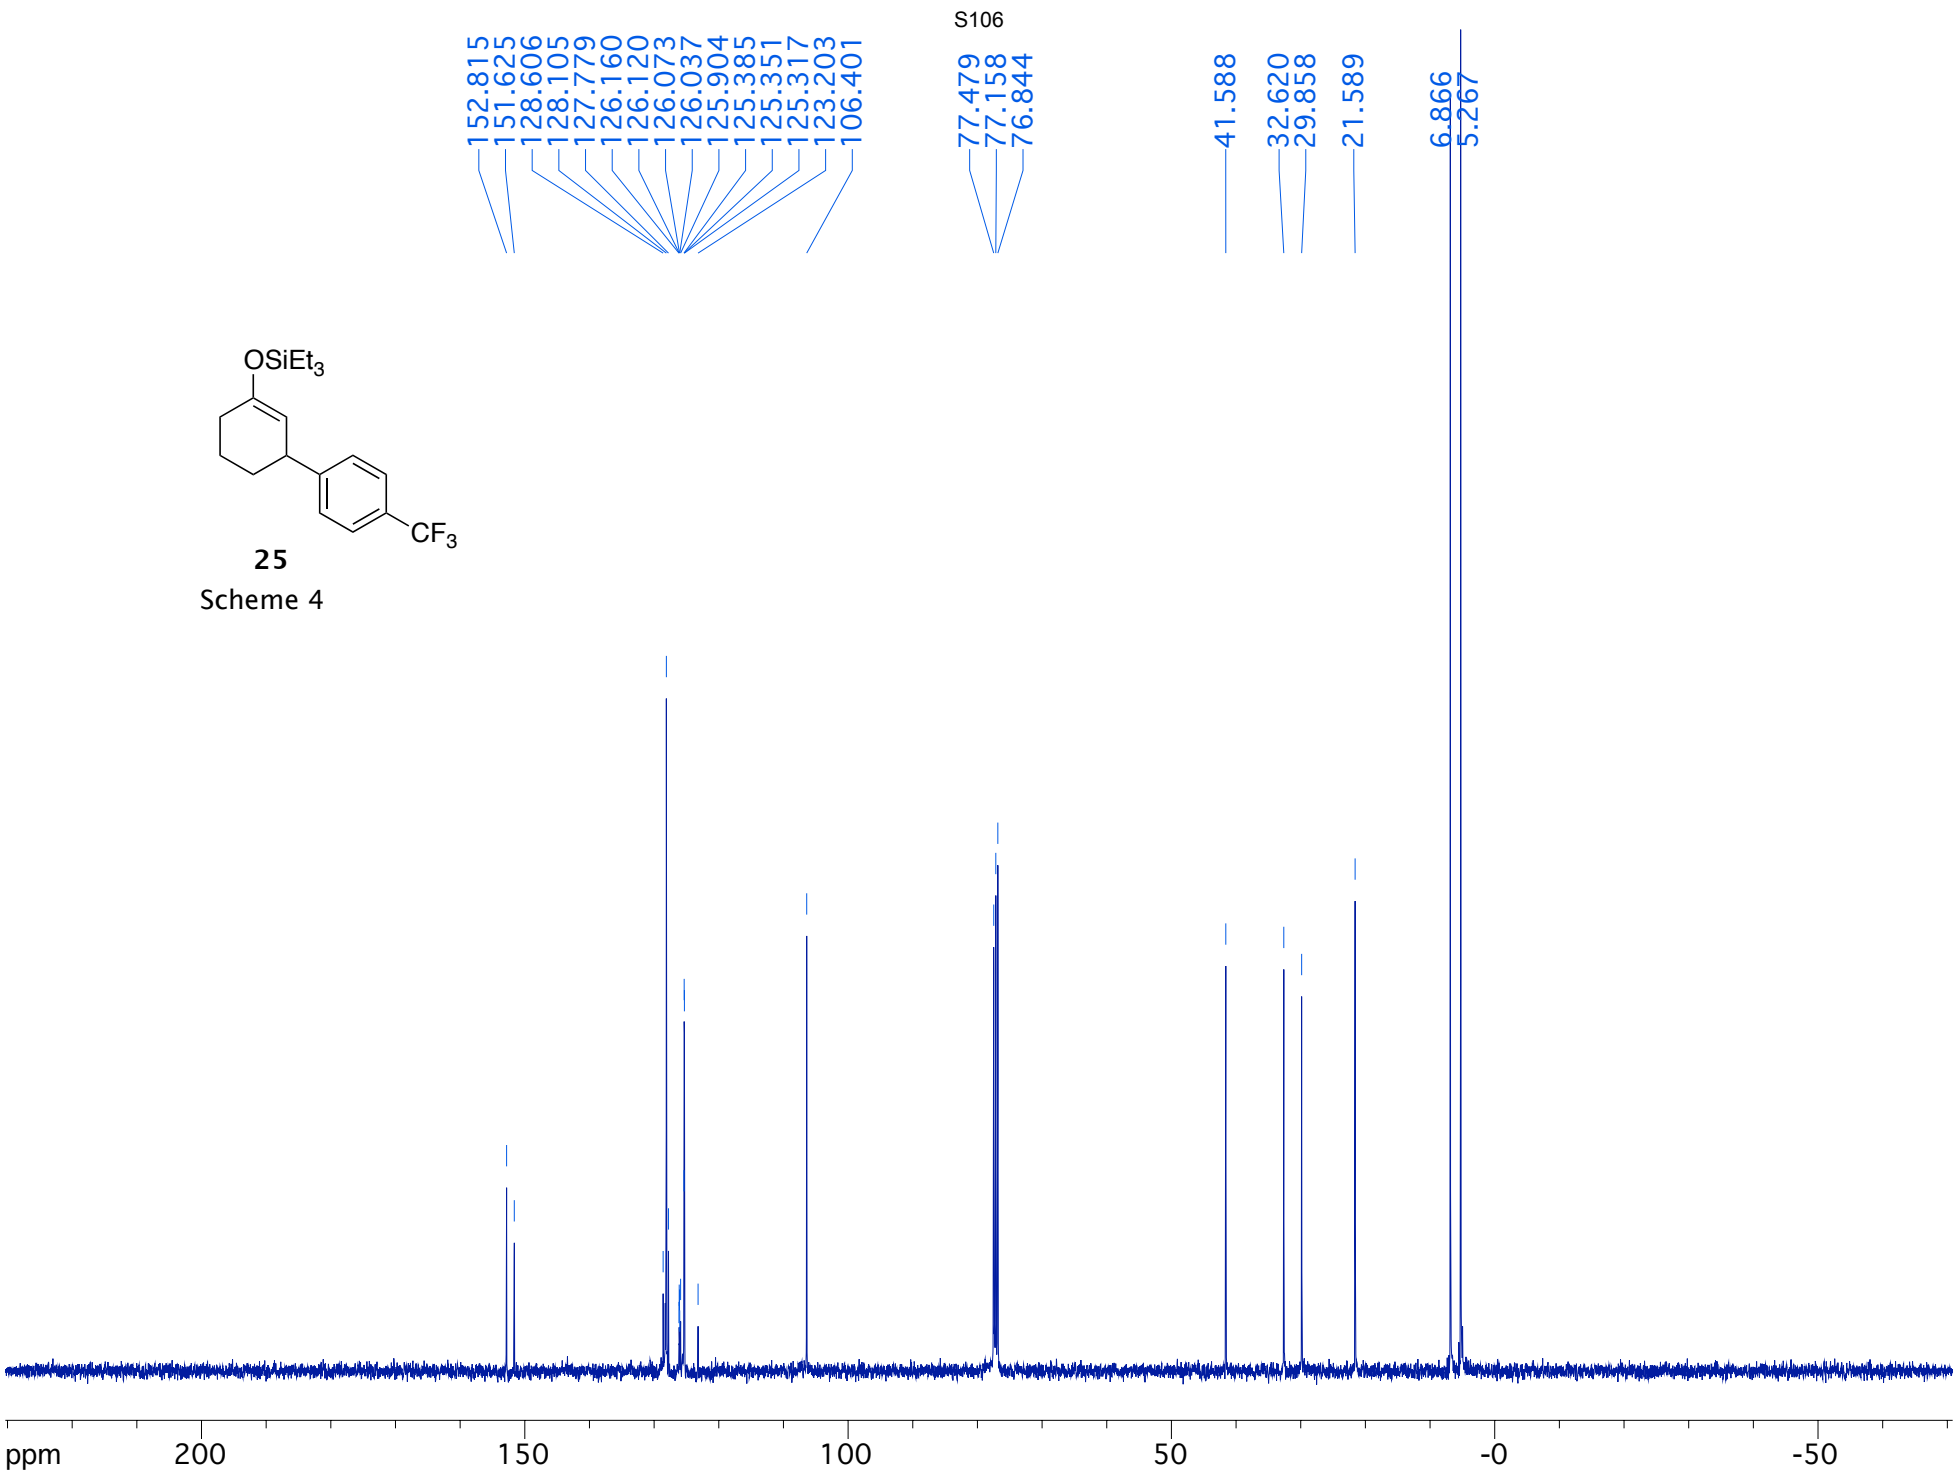



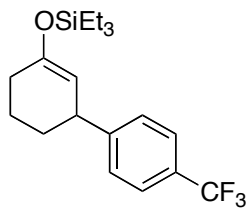

**25**  
Scheme 4

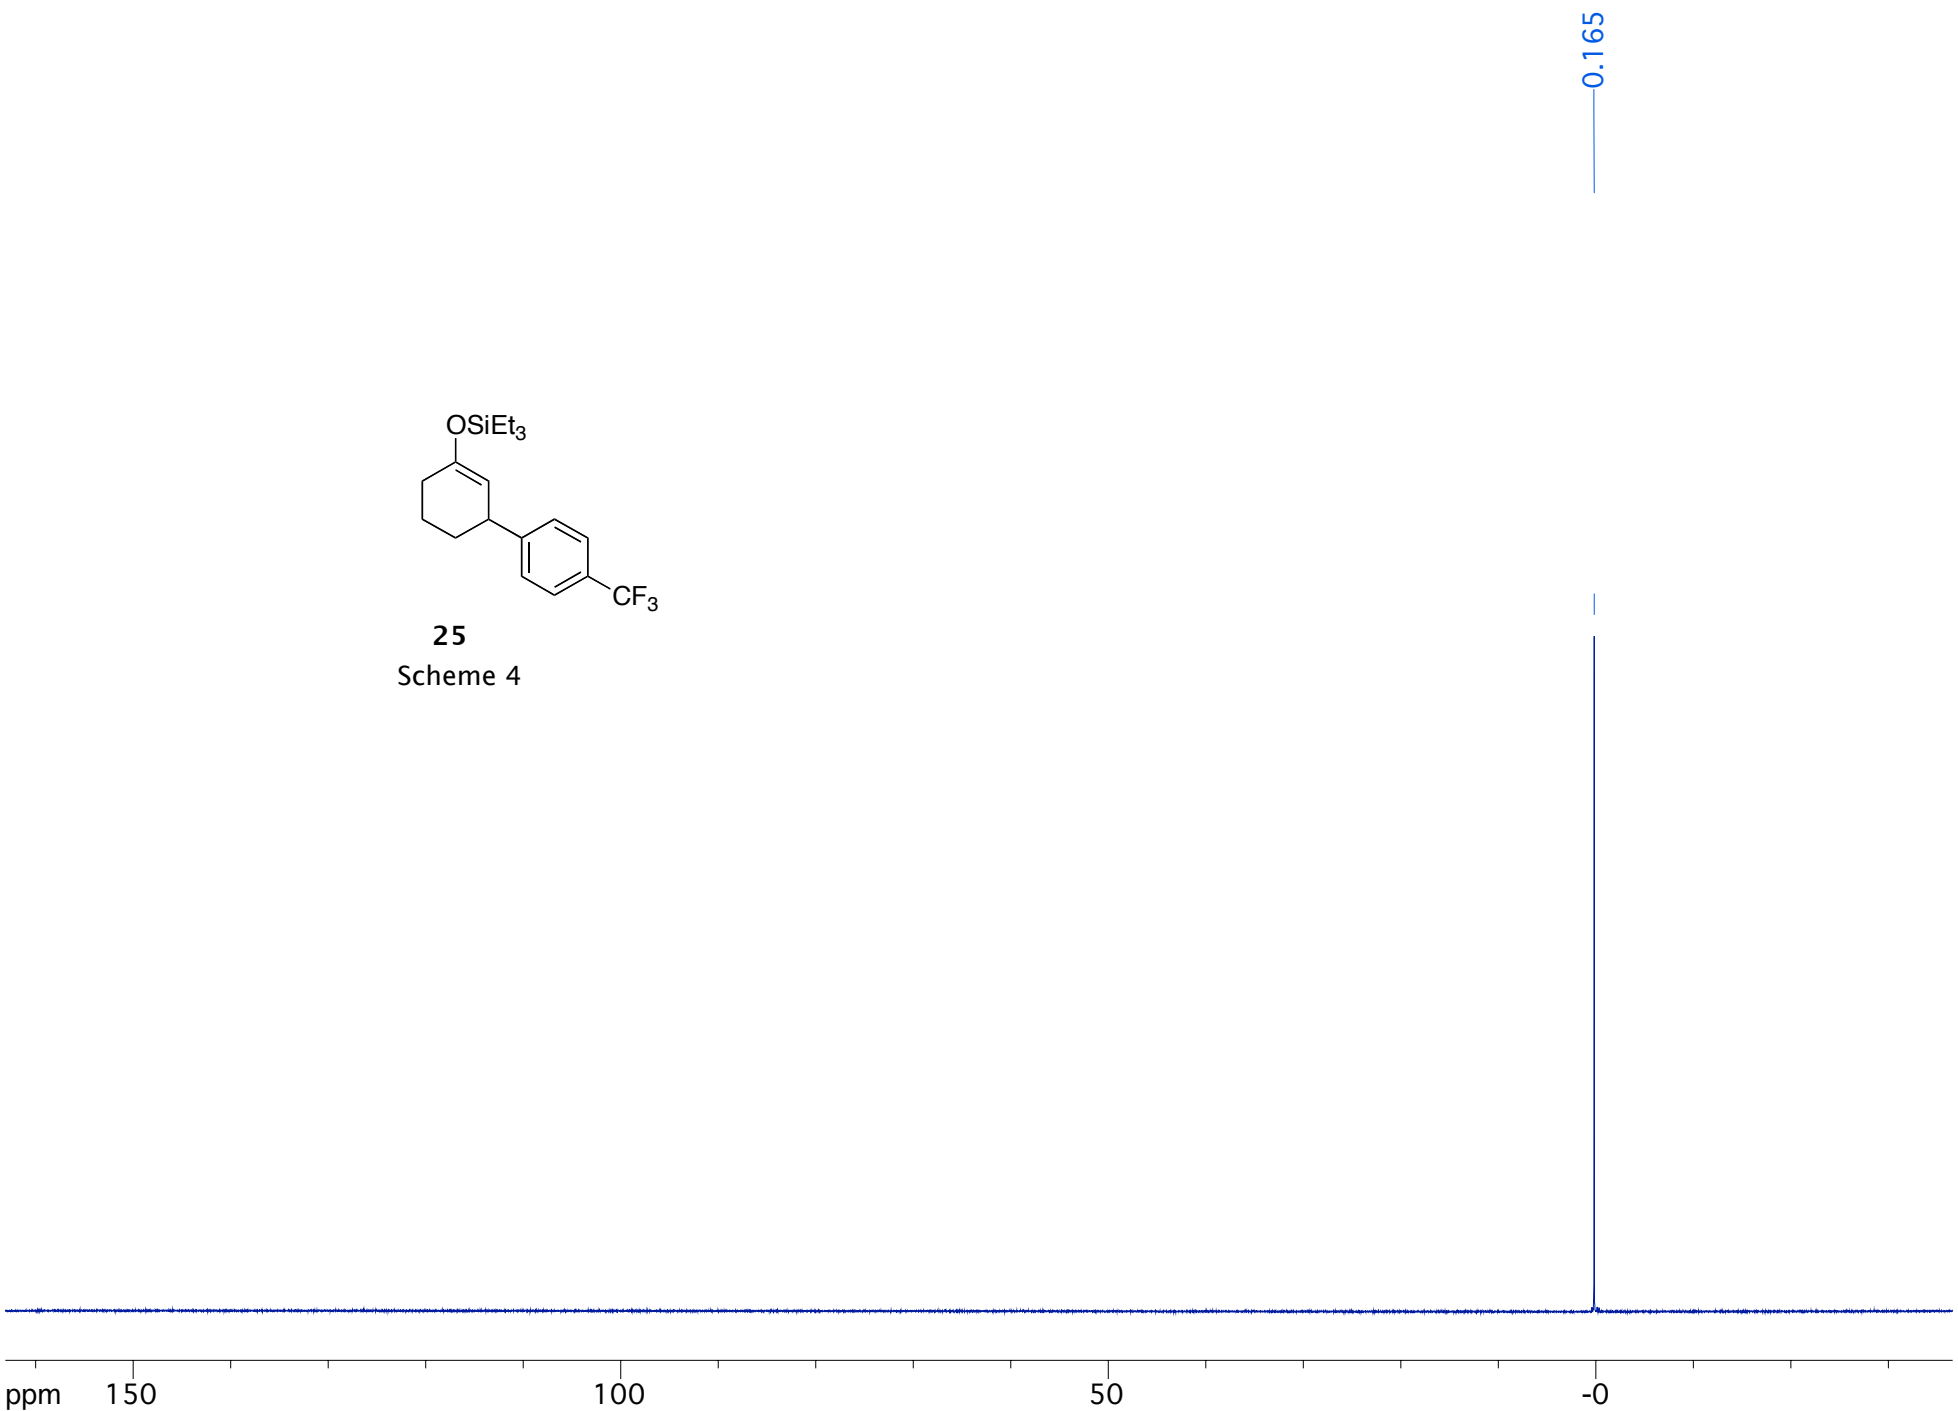

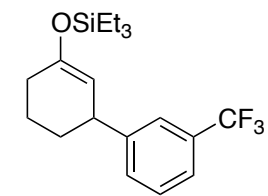

26  
Scheme 4

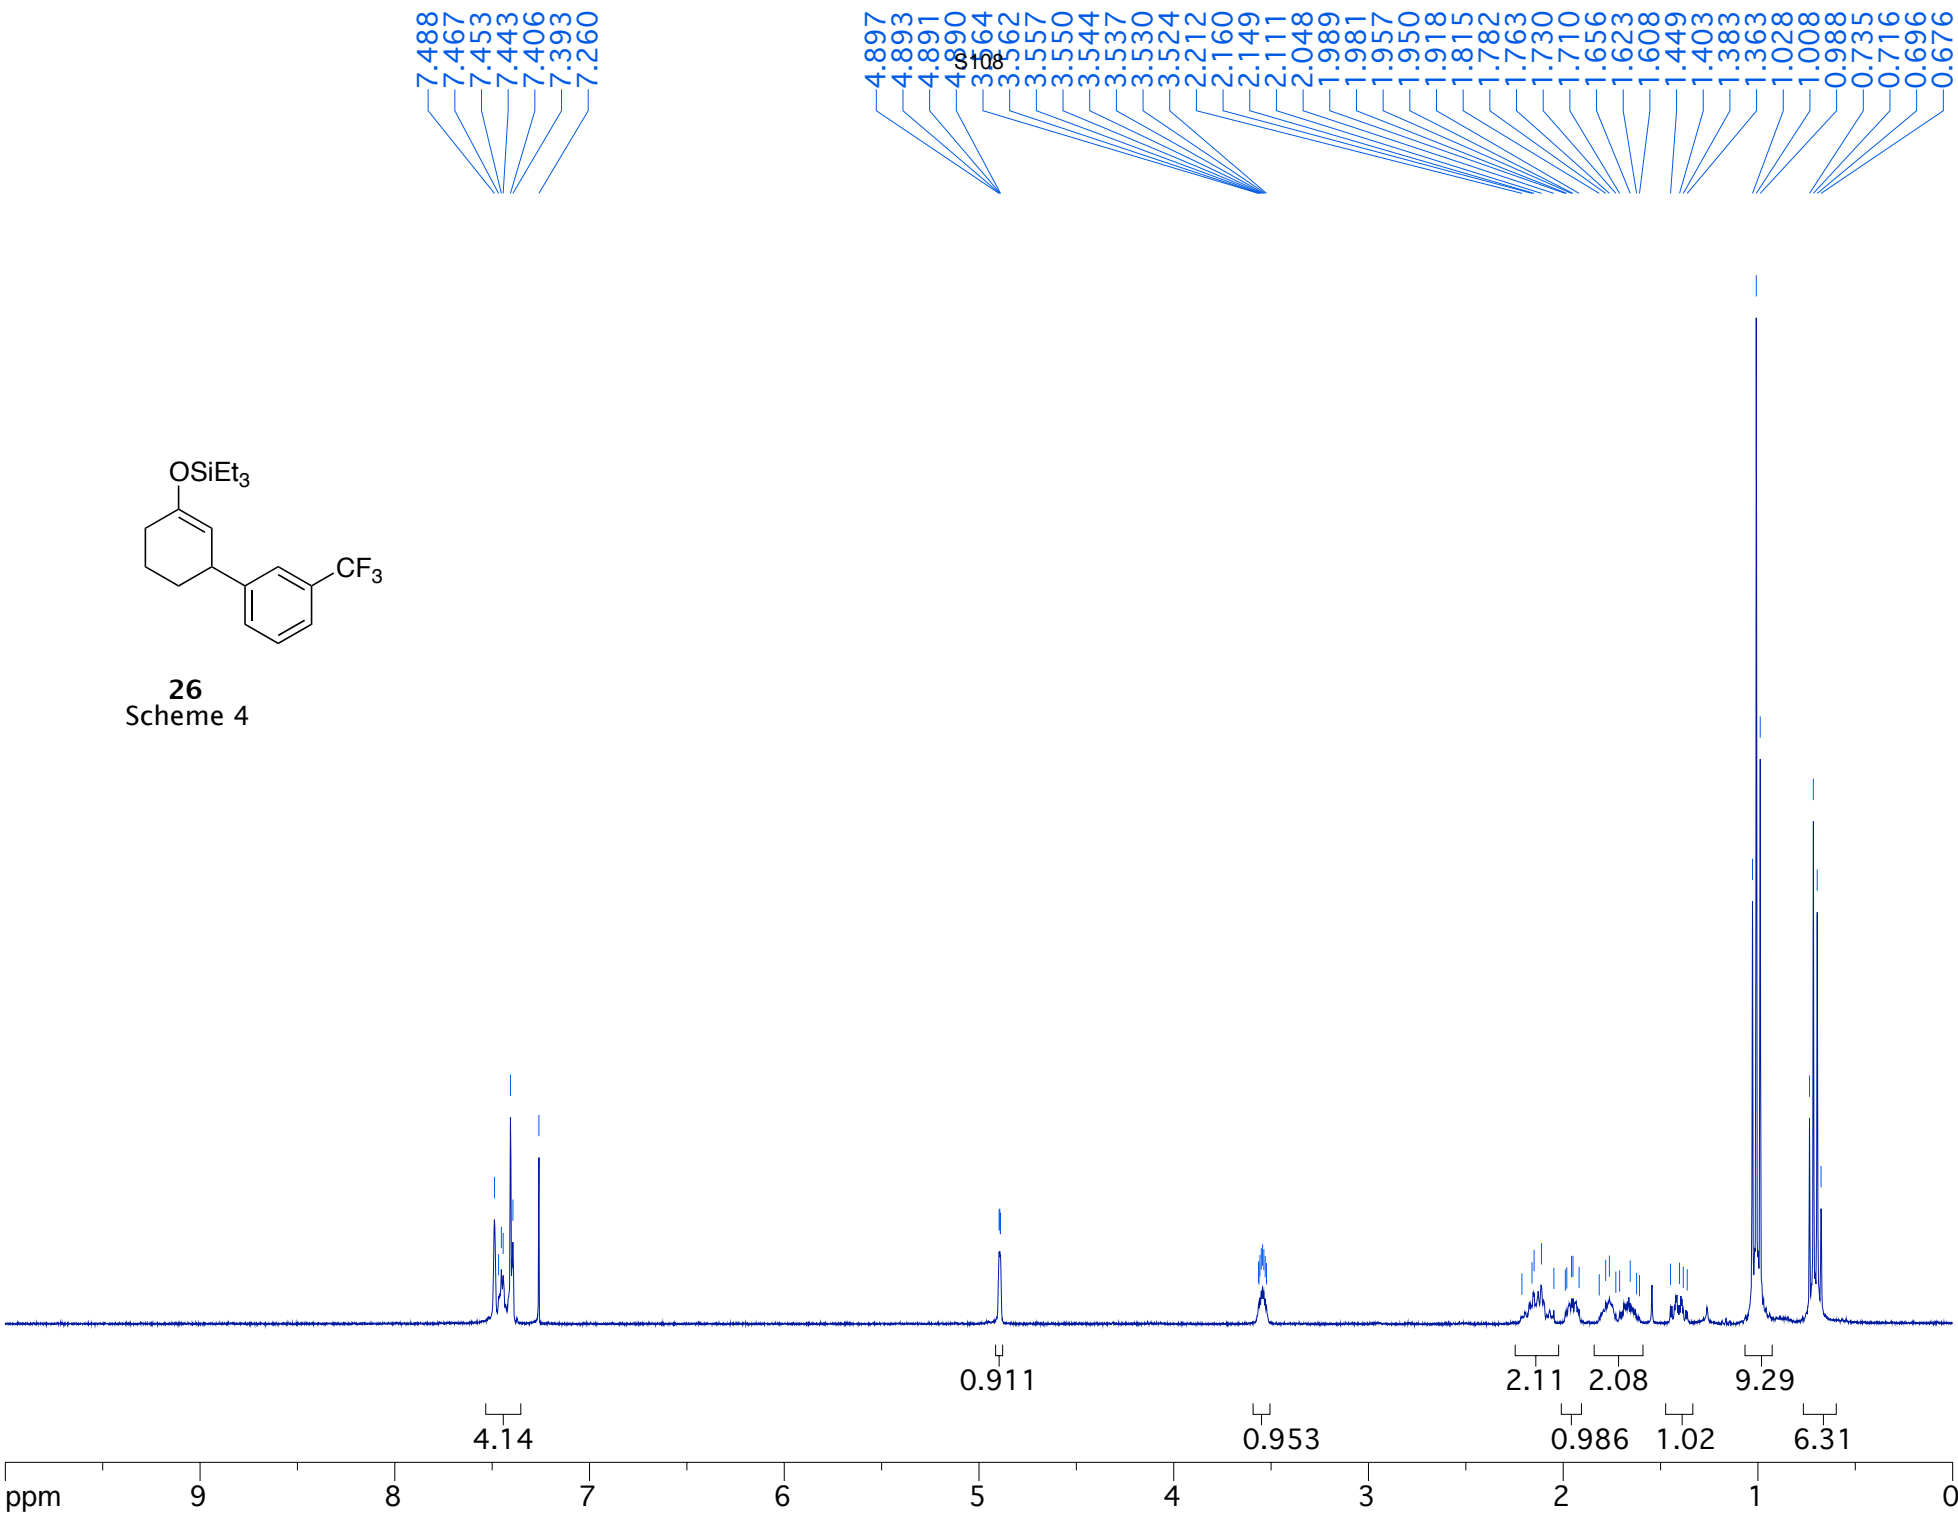

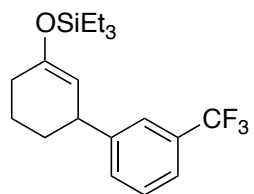

26

Scheme 4

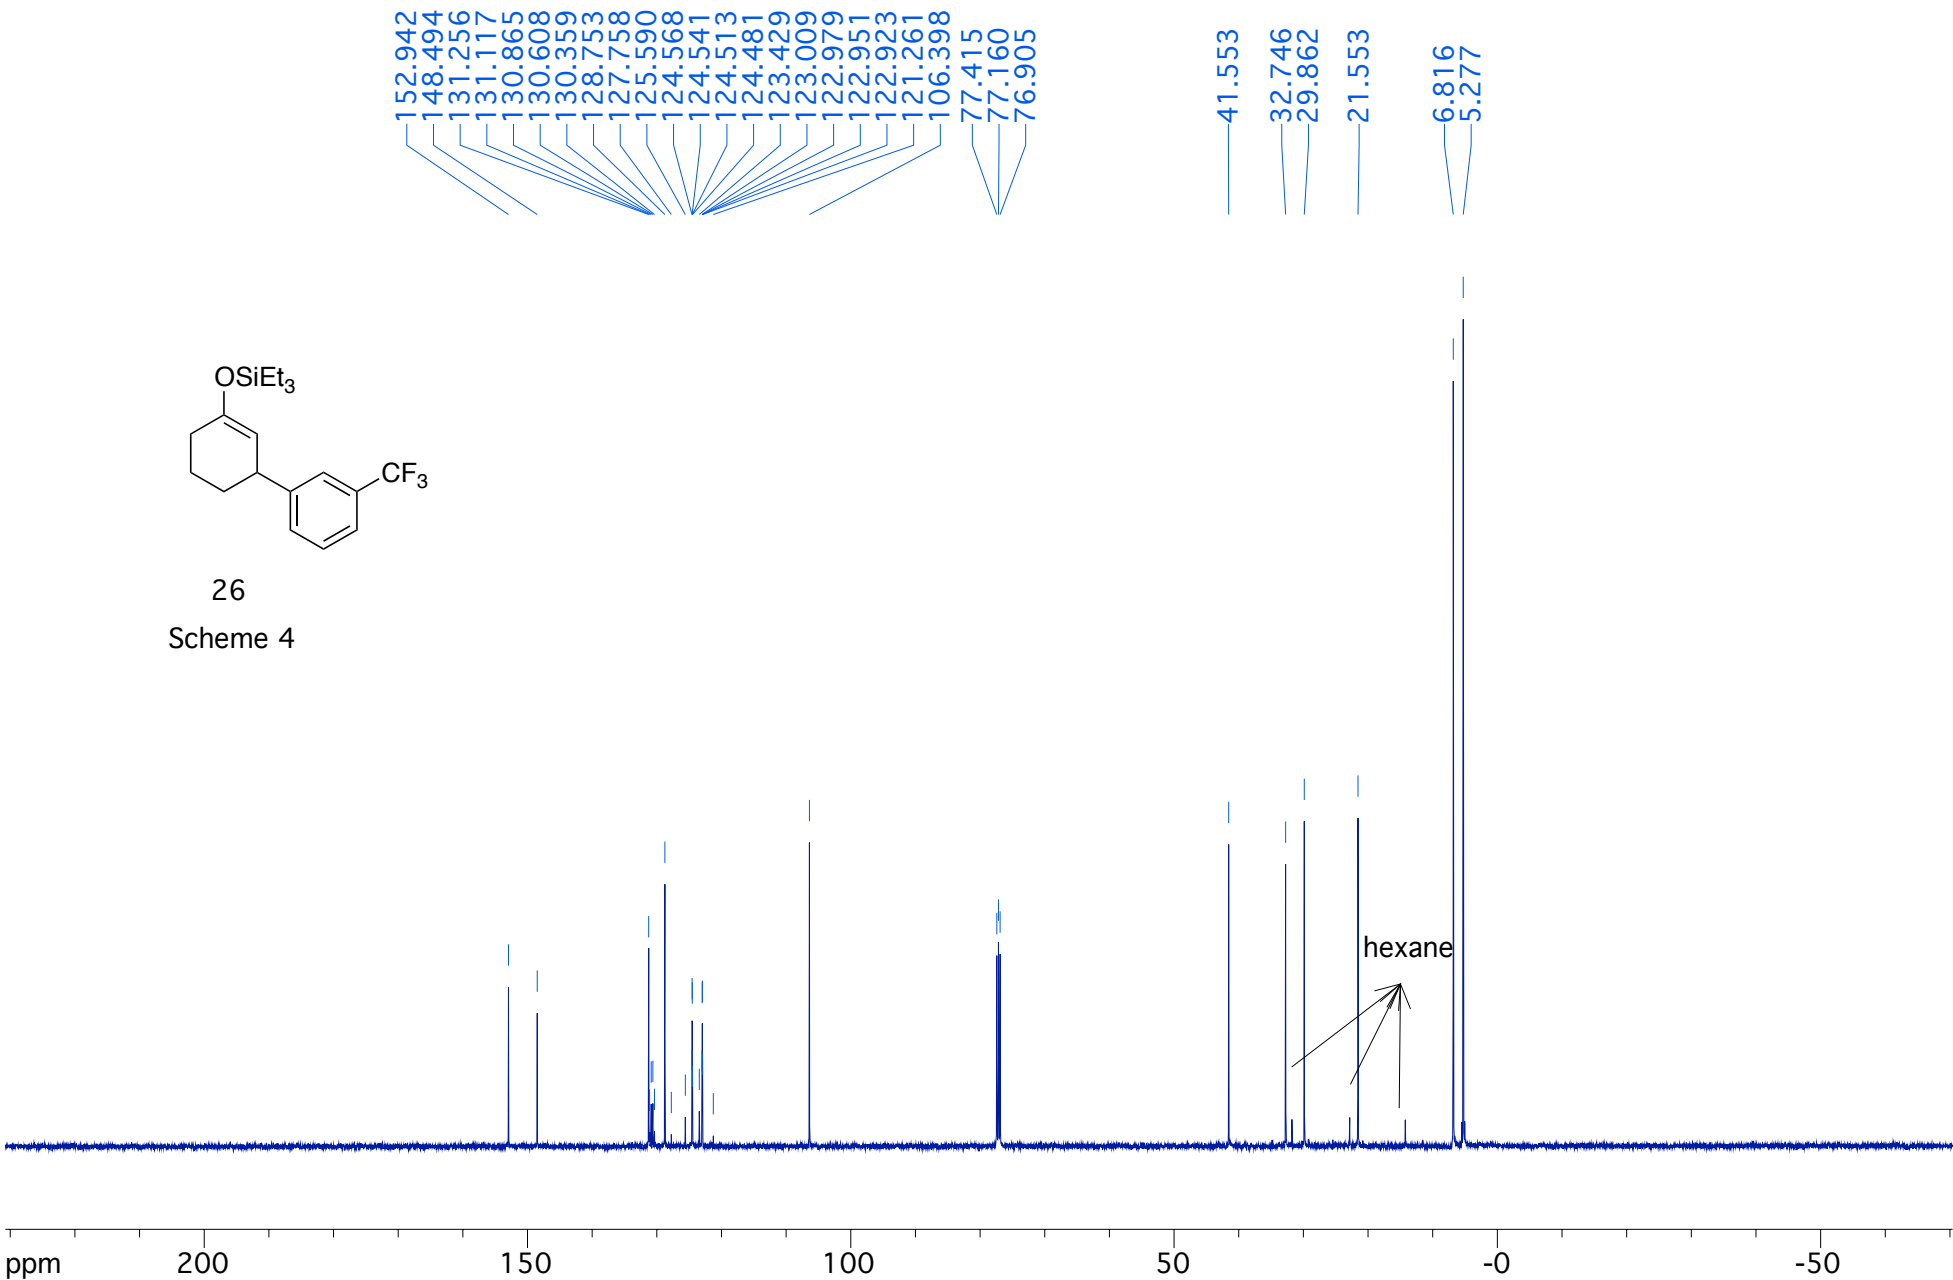

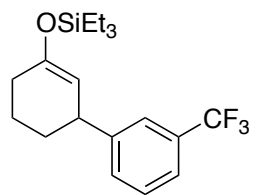

**26**  
Scheme 4

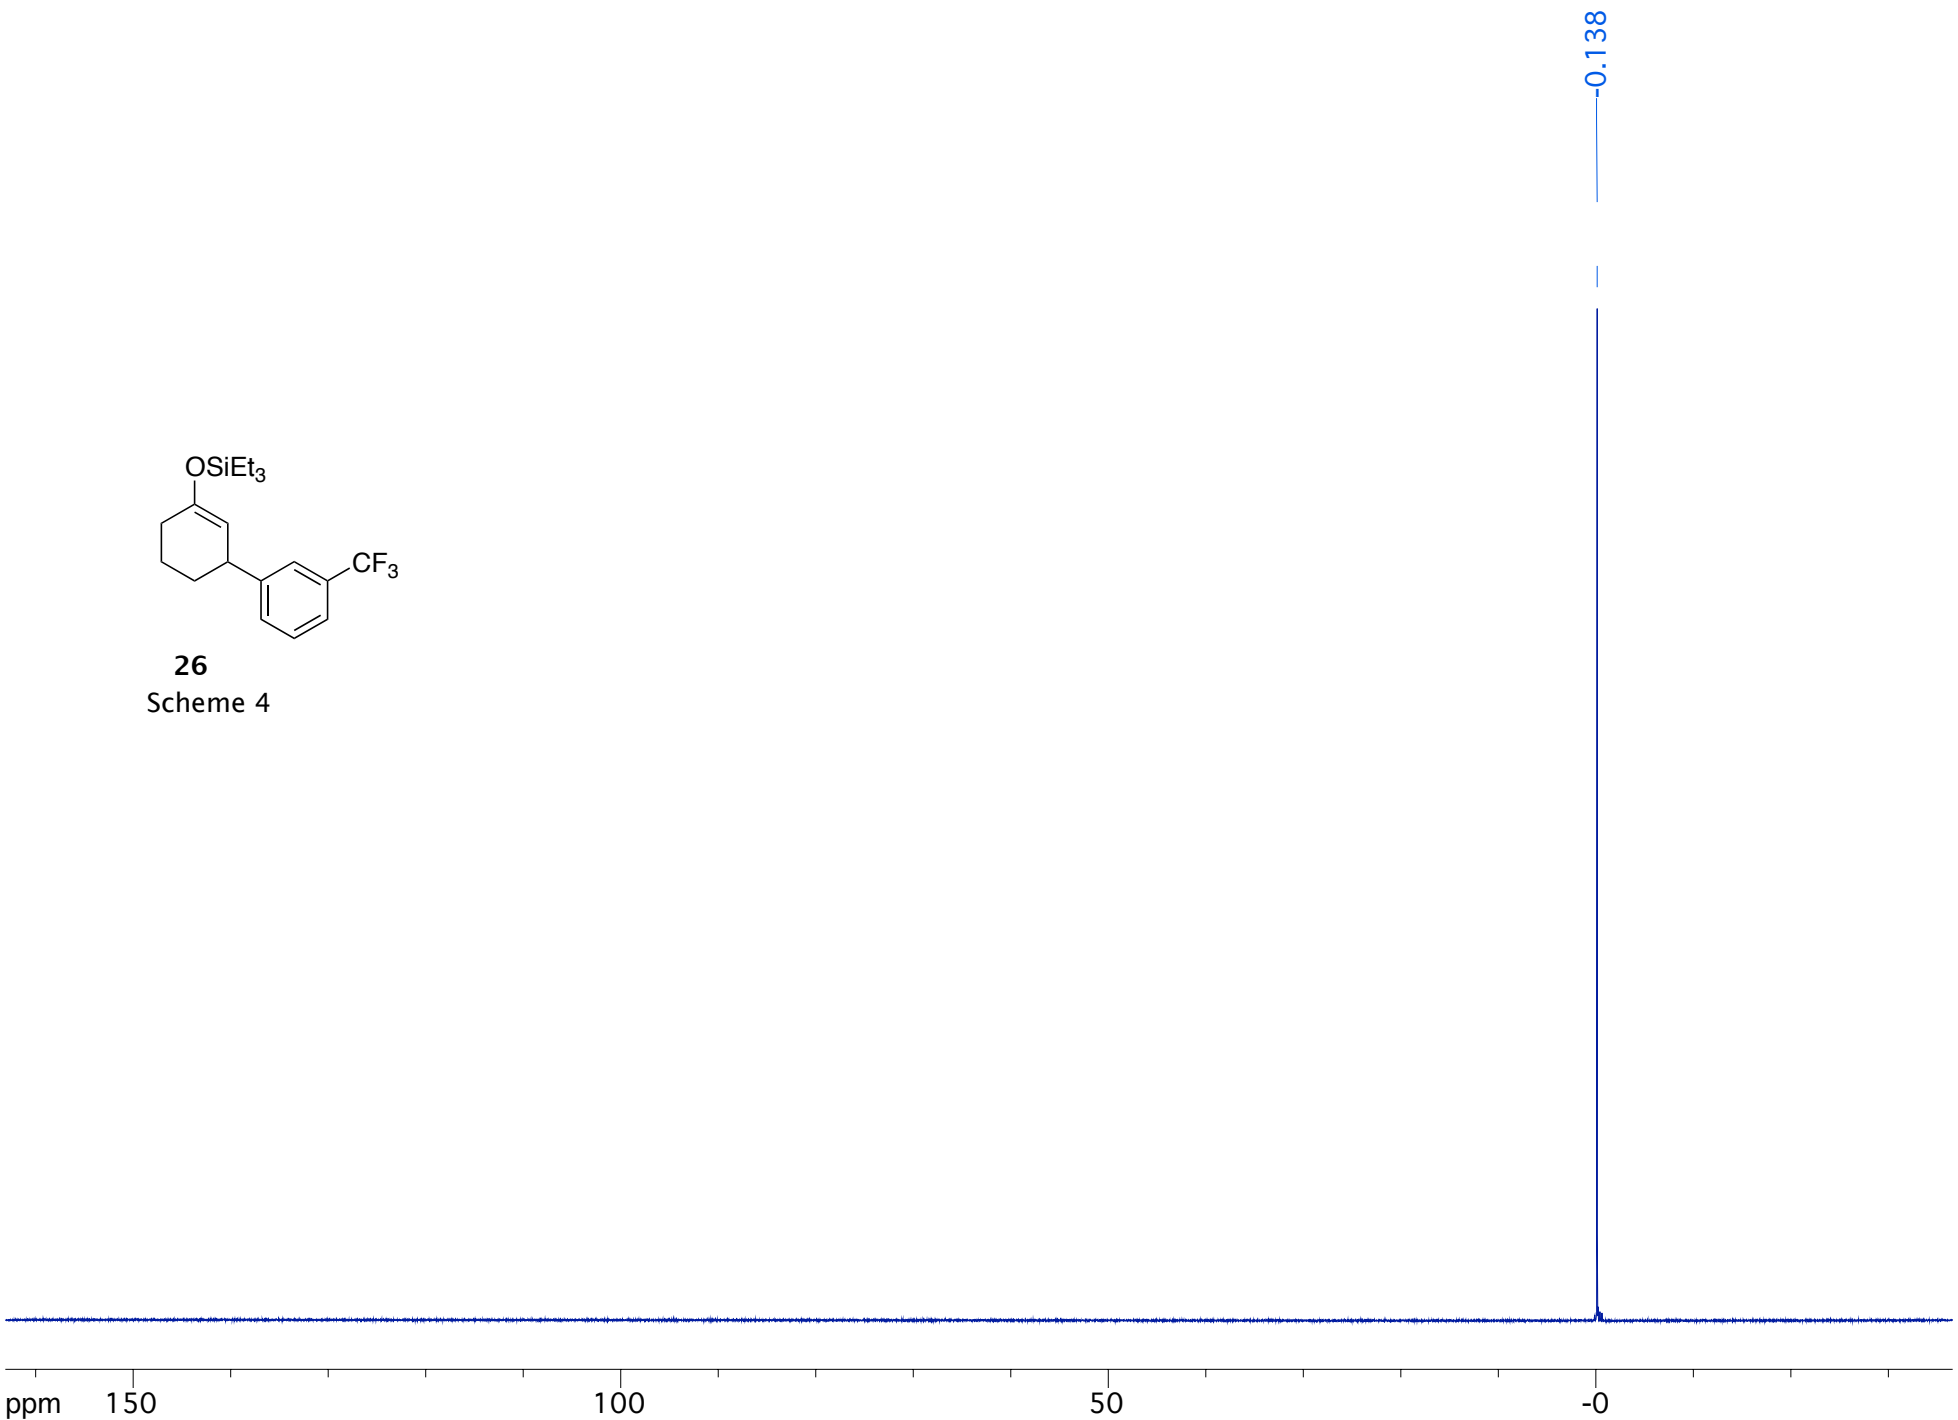

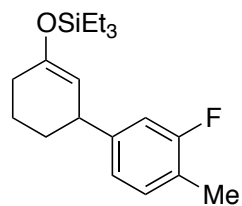

27  
Scheme 4

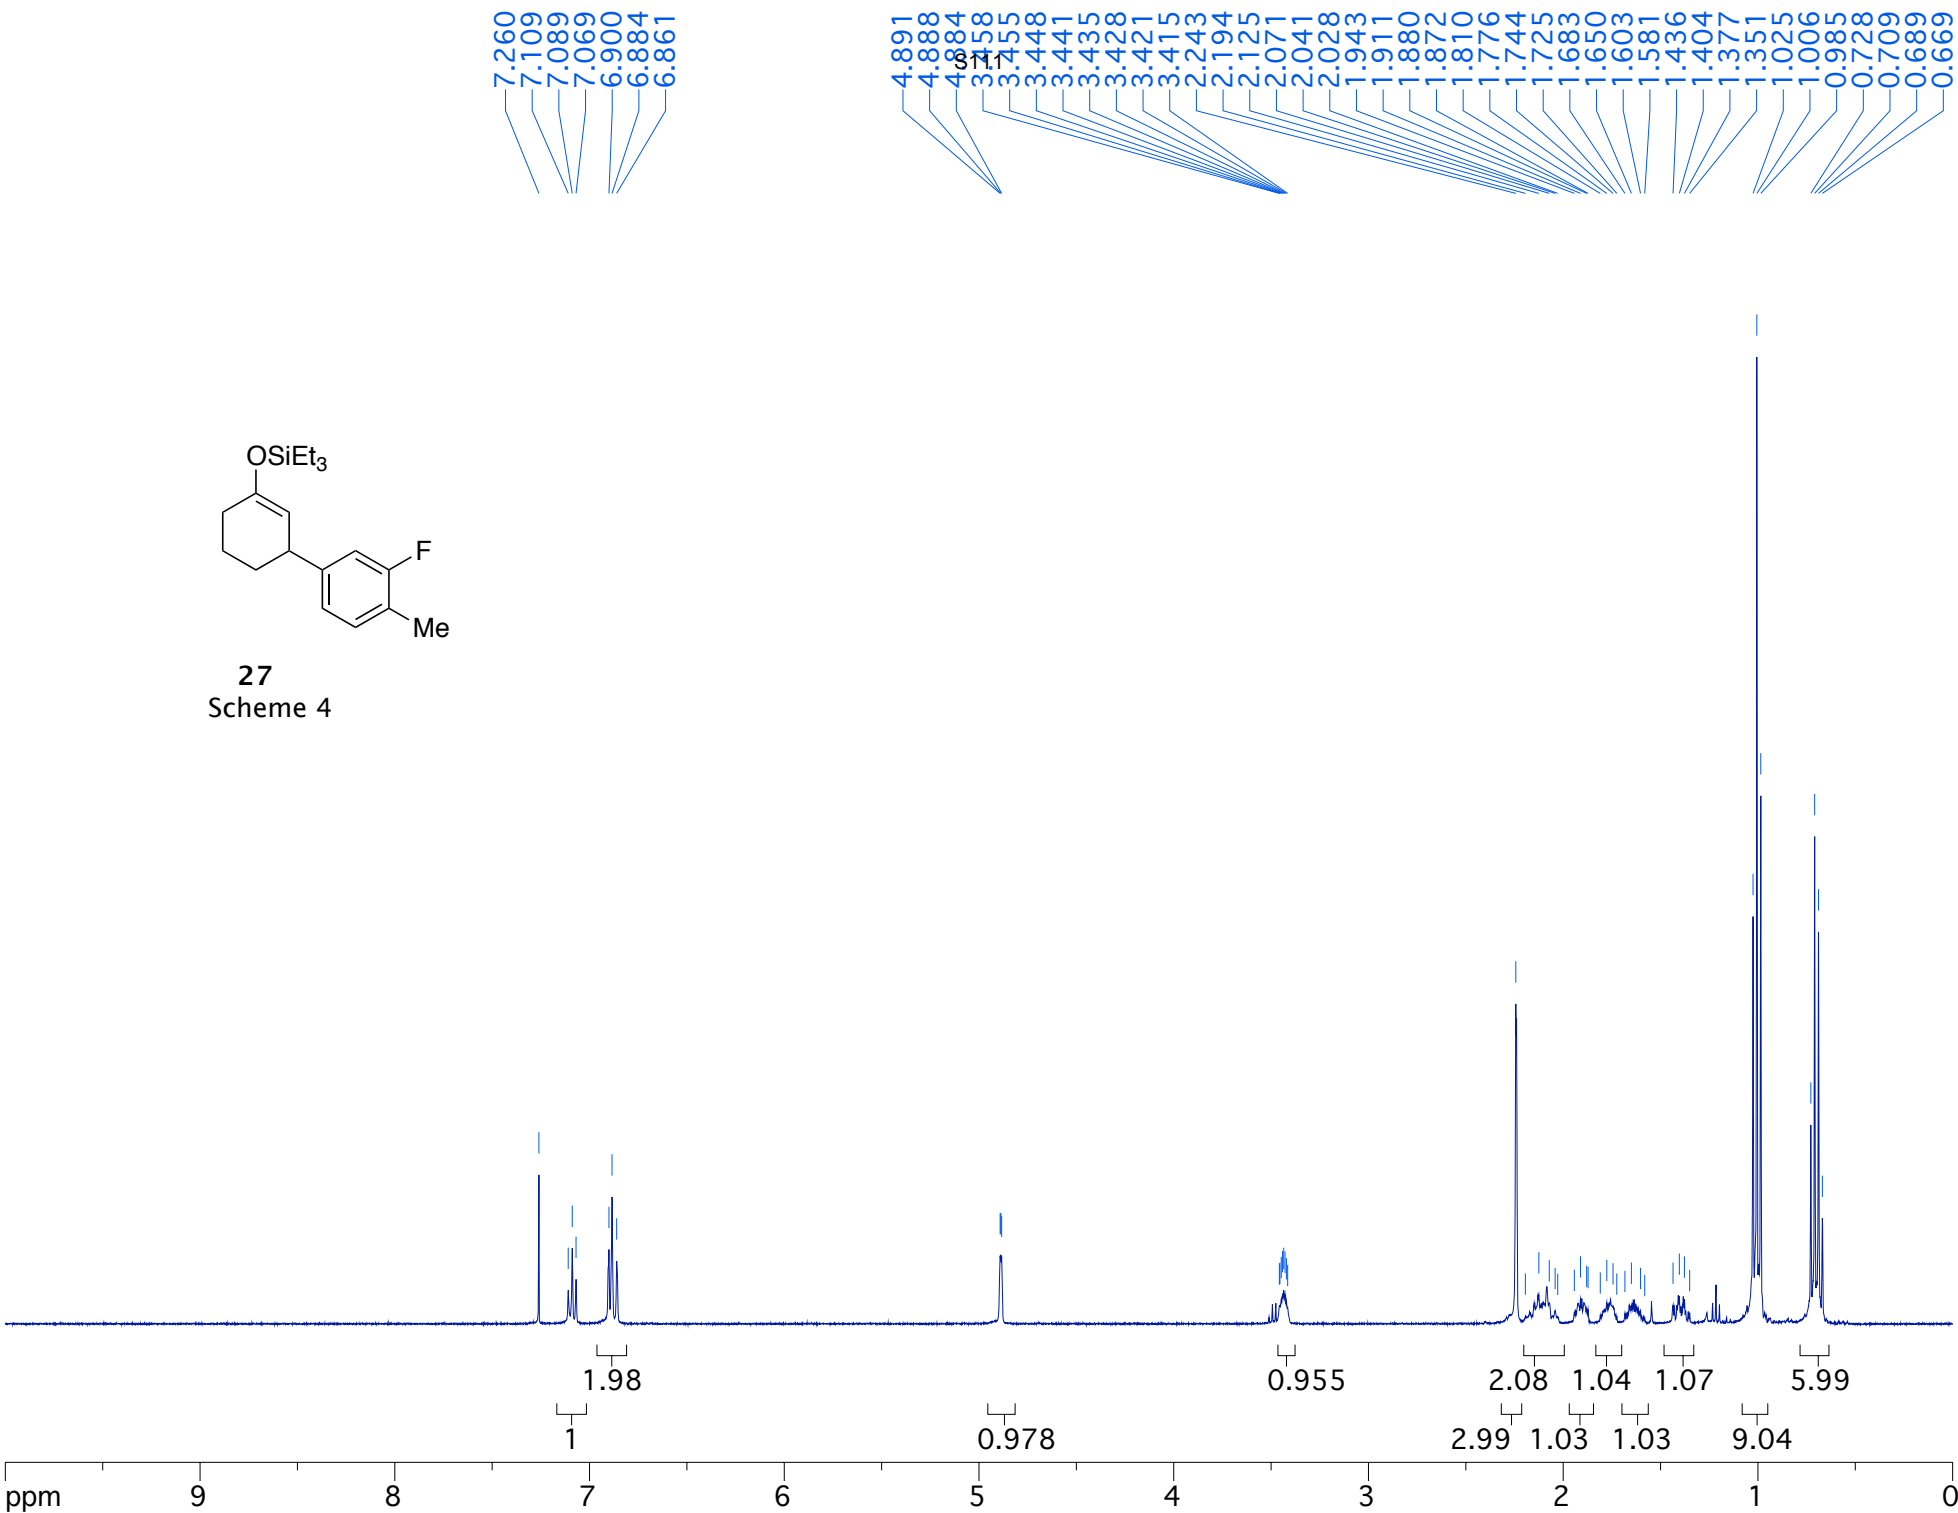

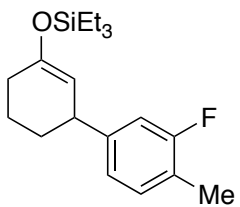

27  
Scheme 4

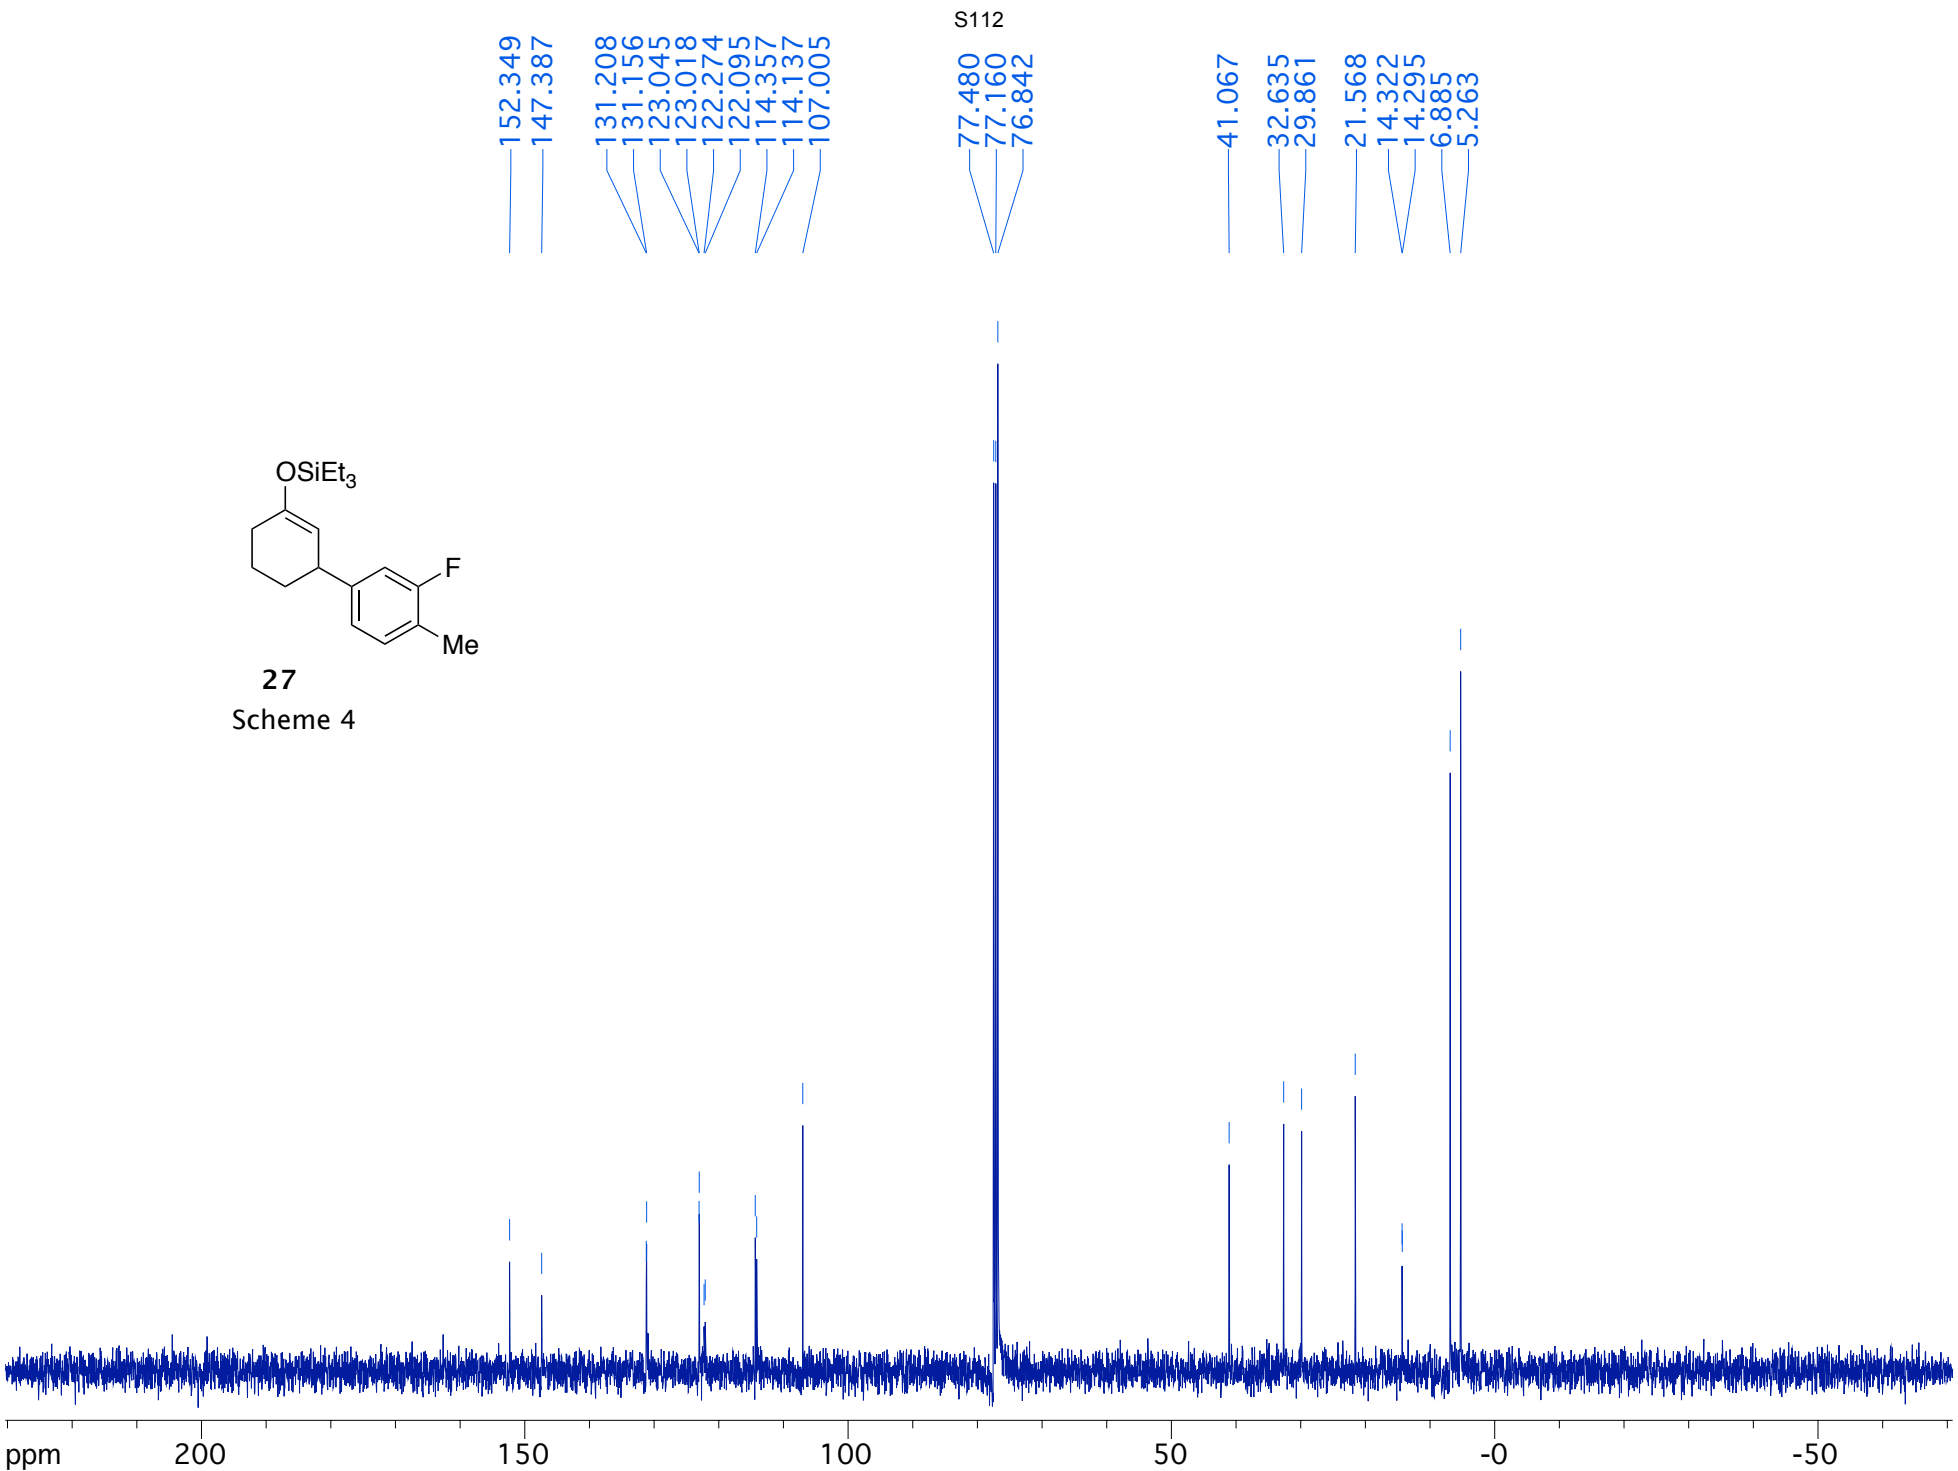

S113

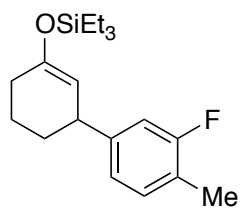

27  
Scheme 4

40.348

ppm 150 100 50 -0

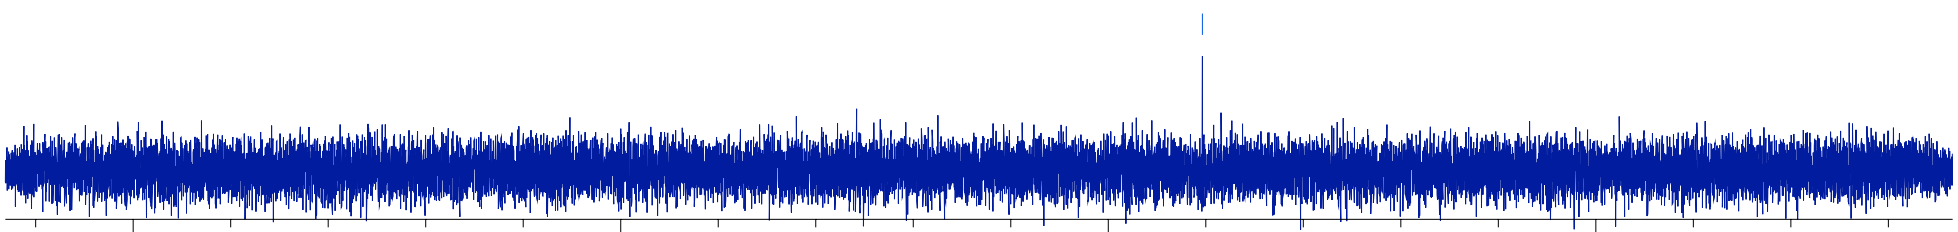

8.055  
8.037  
7.975  
7.955  
7.912  
7.892  
7.593  
7.572  
7.560  
7.539  
7.460  
7.440  
7.421  
7.297  
7.276  
7.260  
4.896  
4.895  
4.893  
3.924  
3.900  
3.557  
3.551  
3.544  
3.537  
3.531  
3.524  
3.517  
3.510  
3.207  
2.207  
2.163  
2.101  
2.070  
2.044  
1.972  
1.954  
1.933  
1.902  
1.817  
1.803  
1.784  
1.760  
1.704  
1.671  
1.643  
1.602  
1.451  
1.444  
1.432  
1.424  
1.419  
1.412  
1.404  
1.398  
1.392  
1.386  
1.372  
1.365  
1.020  
1.000  
0.980  
0.725  
0.685  
0.665

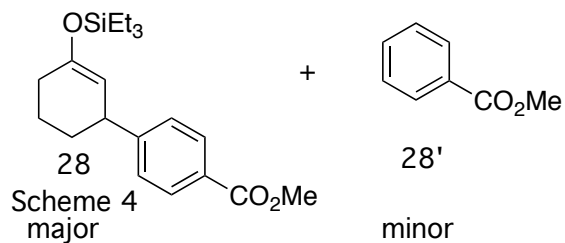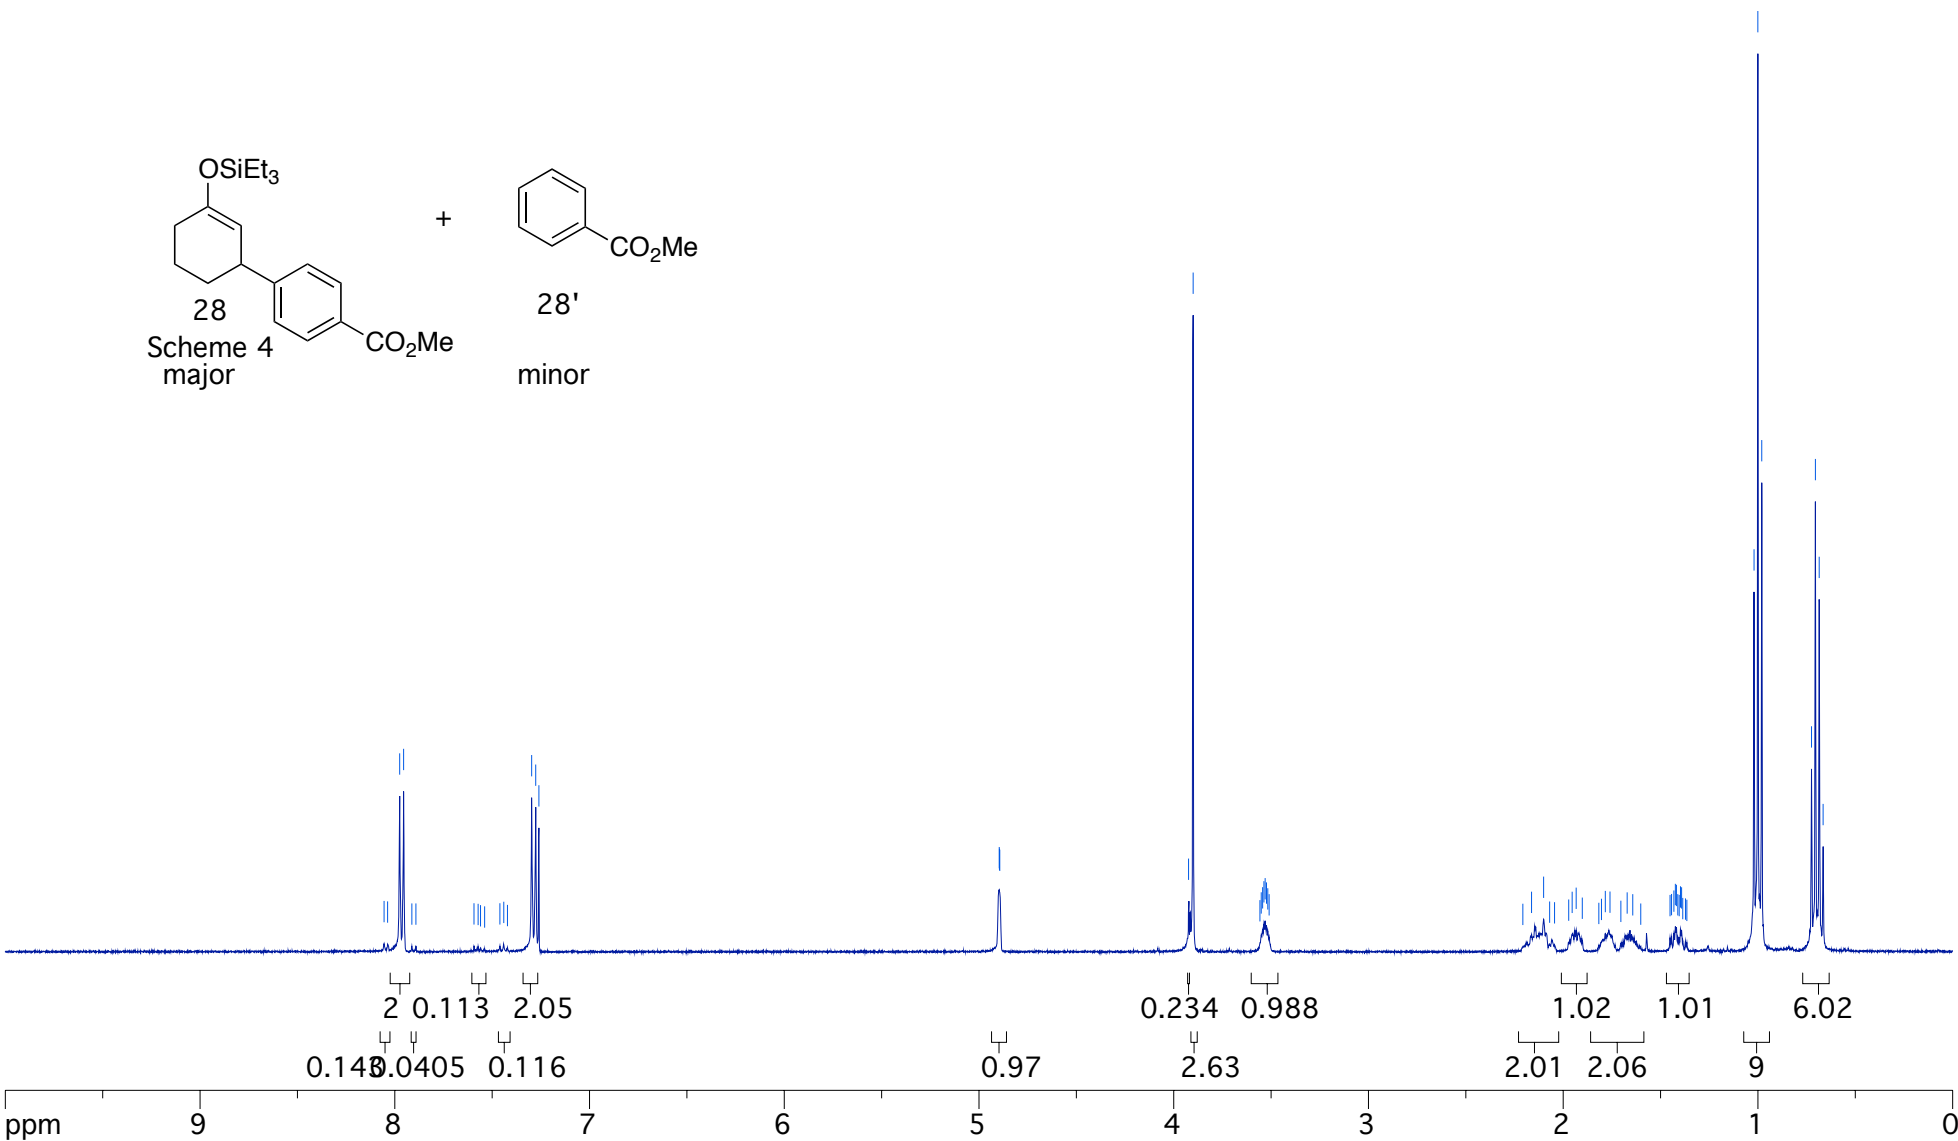



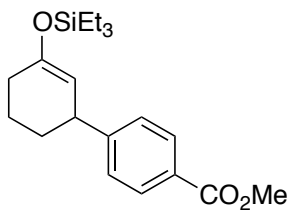

**28**

Scheme 4

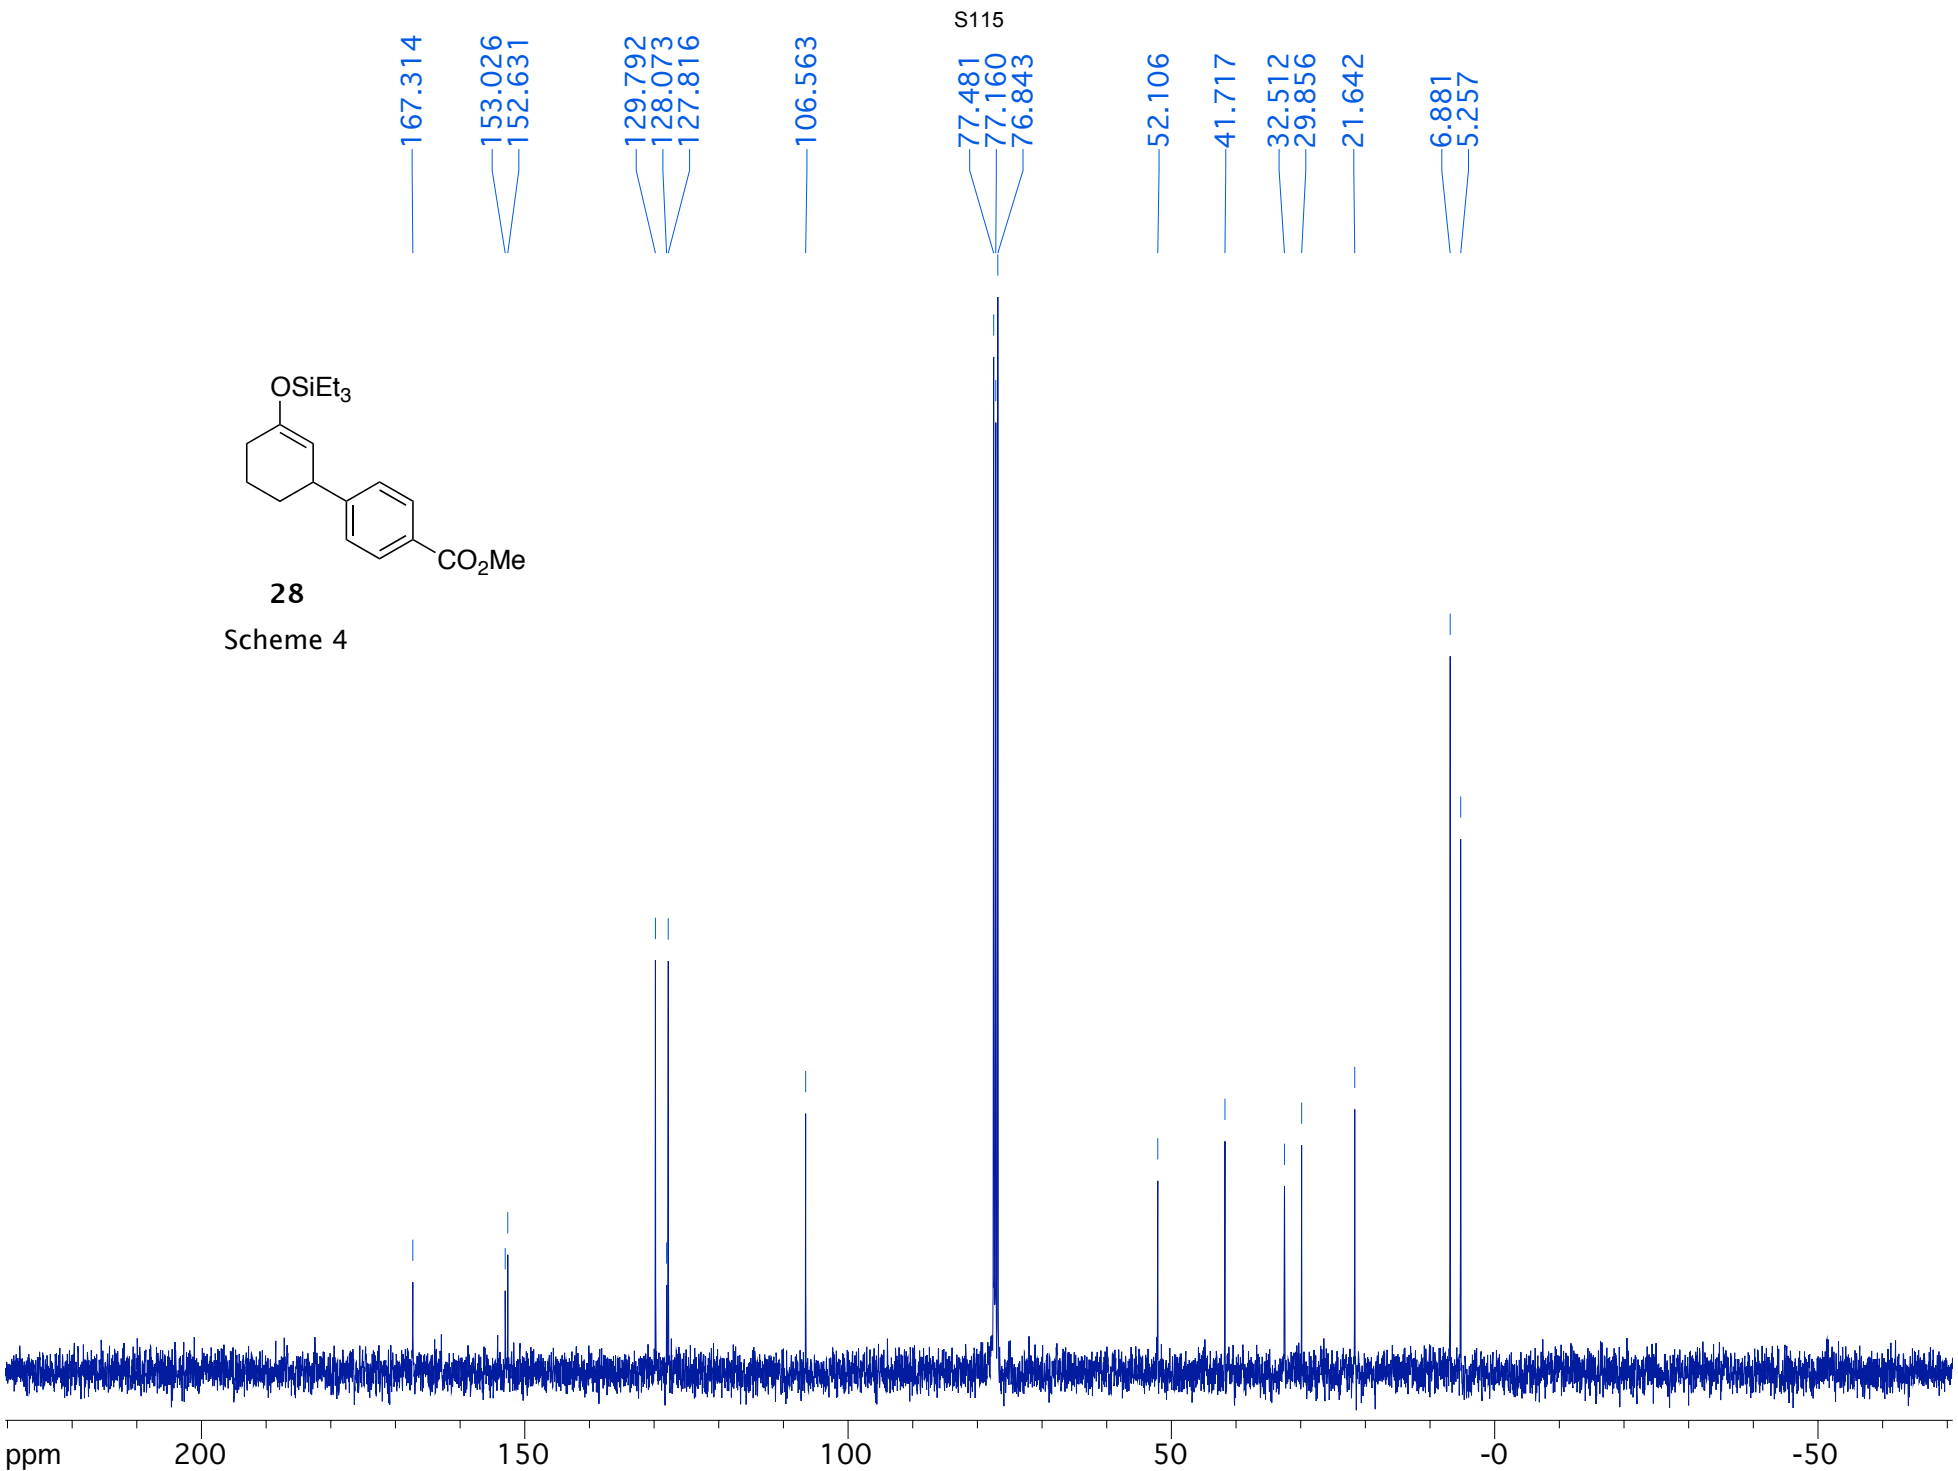

7.904  
7.900  
7.897  
7.893  
7.889  
7.878  
7.874  
7.870  
7.426  
7.422  
7.418  
7.407  
7.403  
7.399  
7.374  
7.356  
7.337  
7.260

4.916  
4.913  
4.910  
4.401  
4.383  
4.366  
4.348  
3.562  
3.555  
3.549  
3.542  
3.535  
3.528  
3.521  
3.515  
2.198  
2.155  
2.104  
2.045  
1.981  
1.974  
1.943  
1.915  
1.911  
1.825  
1.782  
1.742  
1.710  
1.703  
1.669  
1.628  
1.622  
1.455  
1.427  
1.409  
1.401  
1.392  
1.374  
1.028  
1.009  
0.989  
0.737  
0.718  
0.698  
0.679

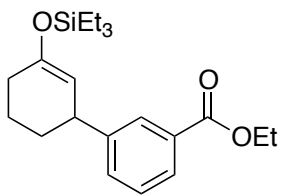

**29**  
Scheme 4

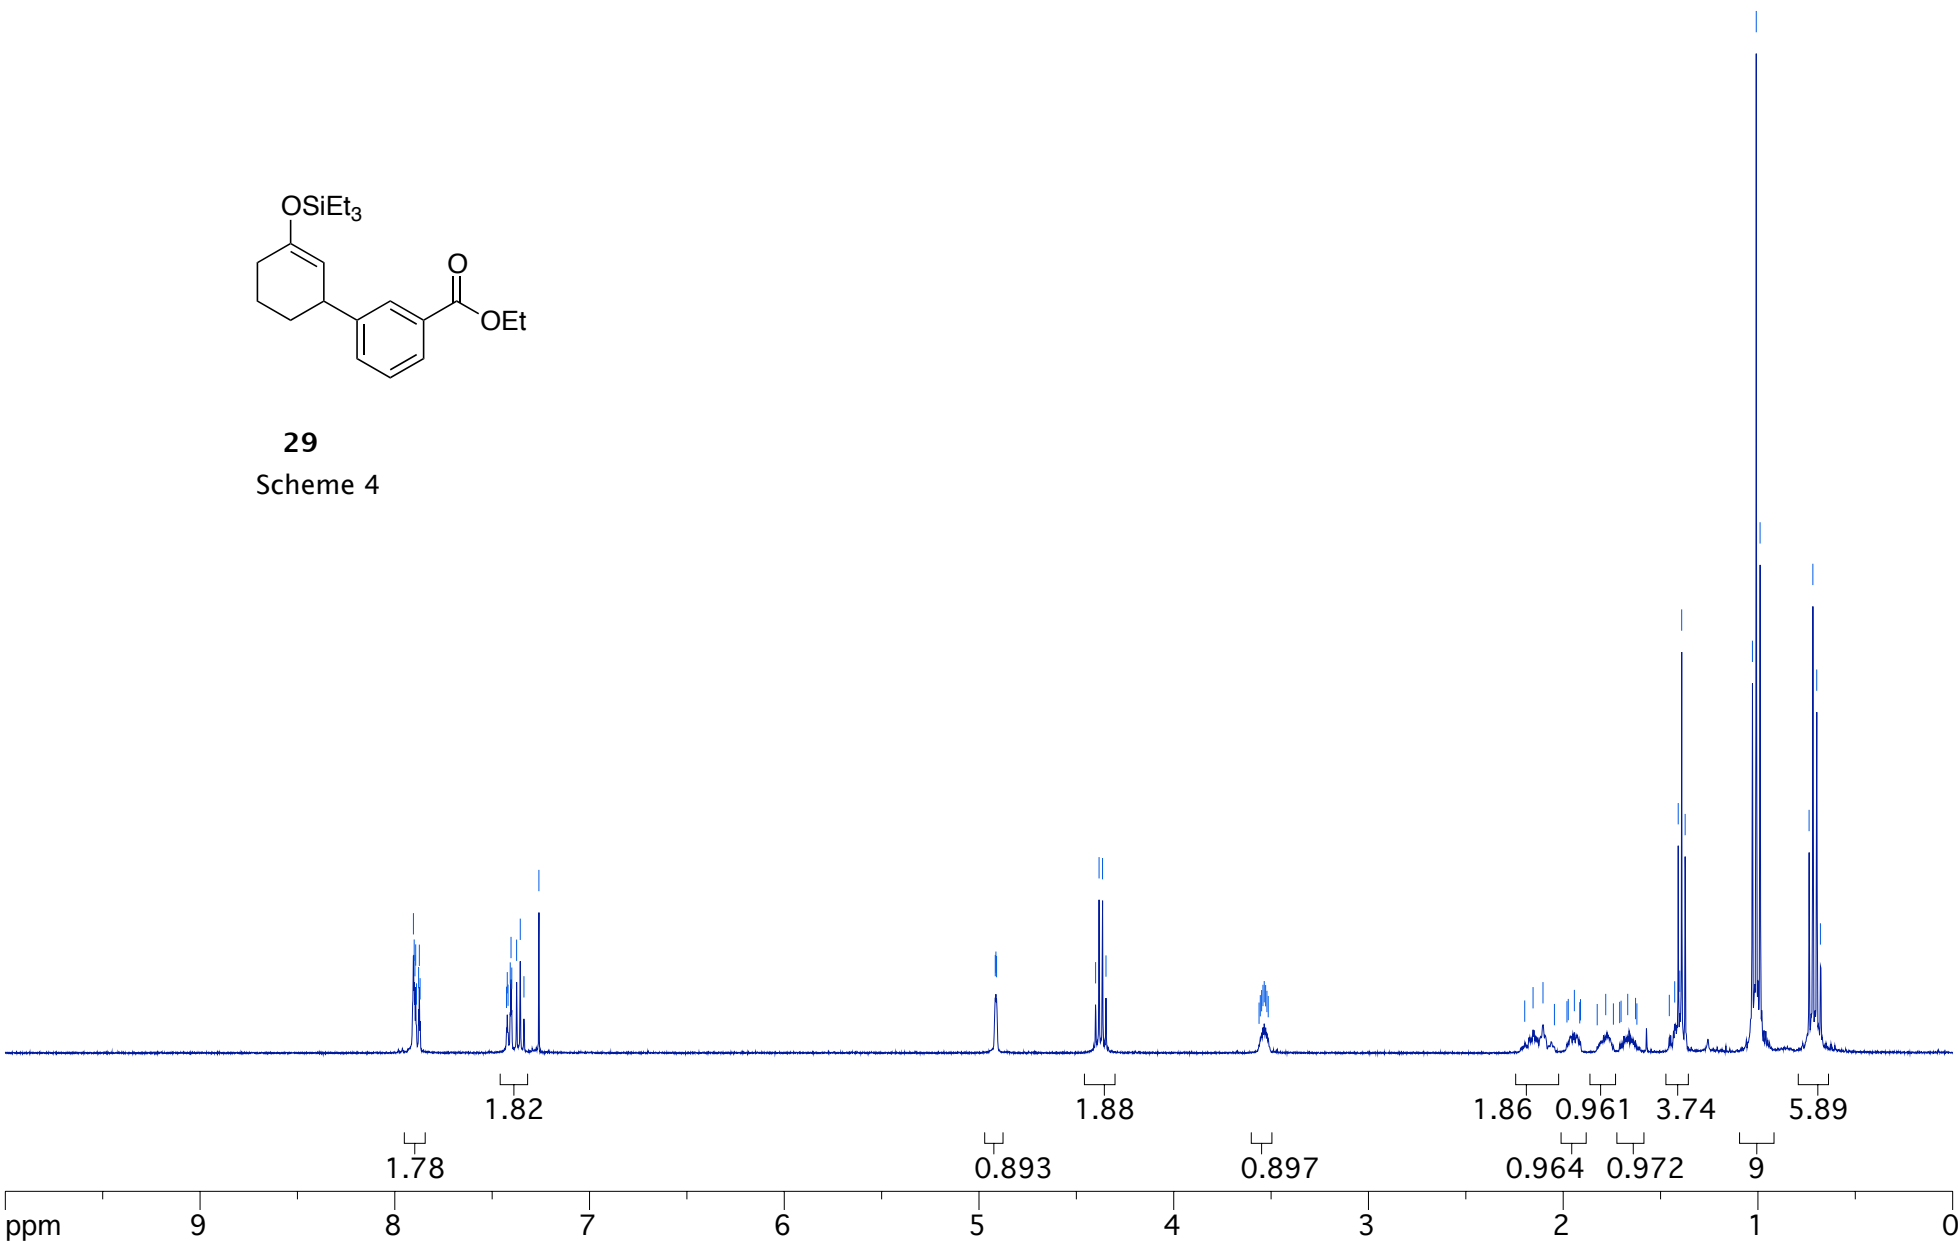

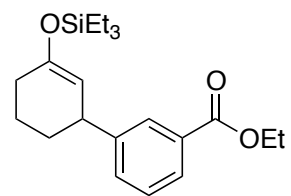

**29**  
Scheme 4

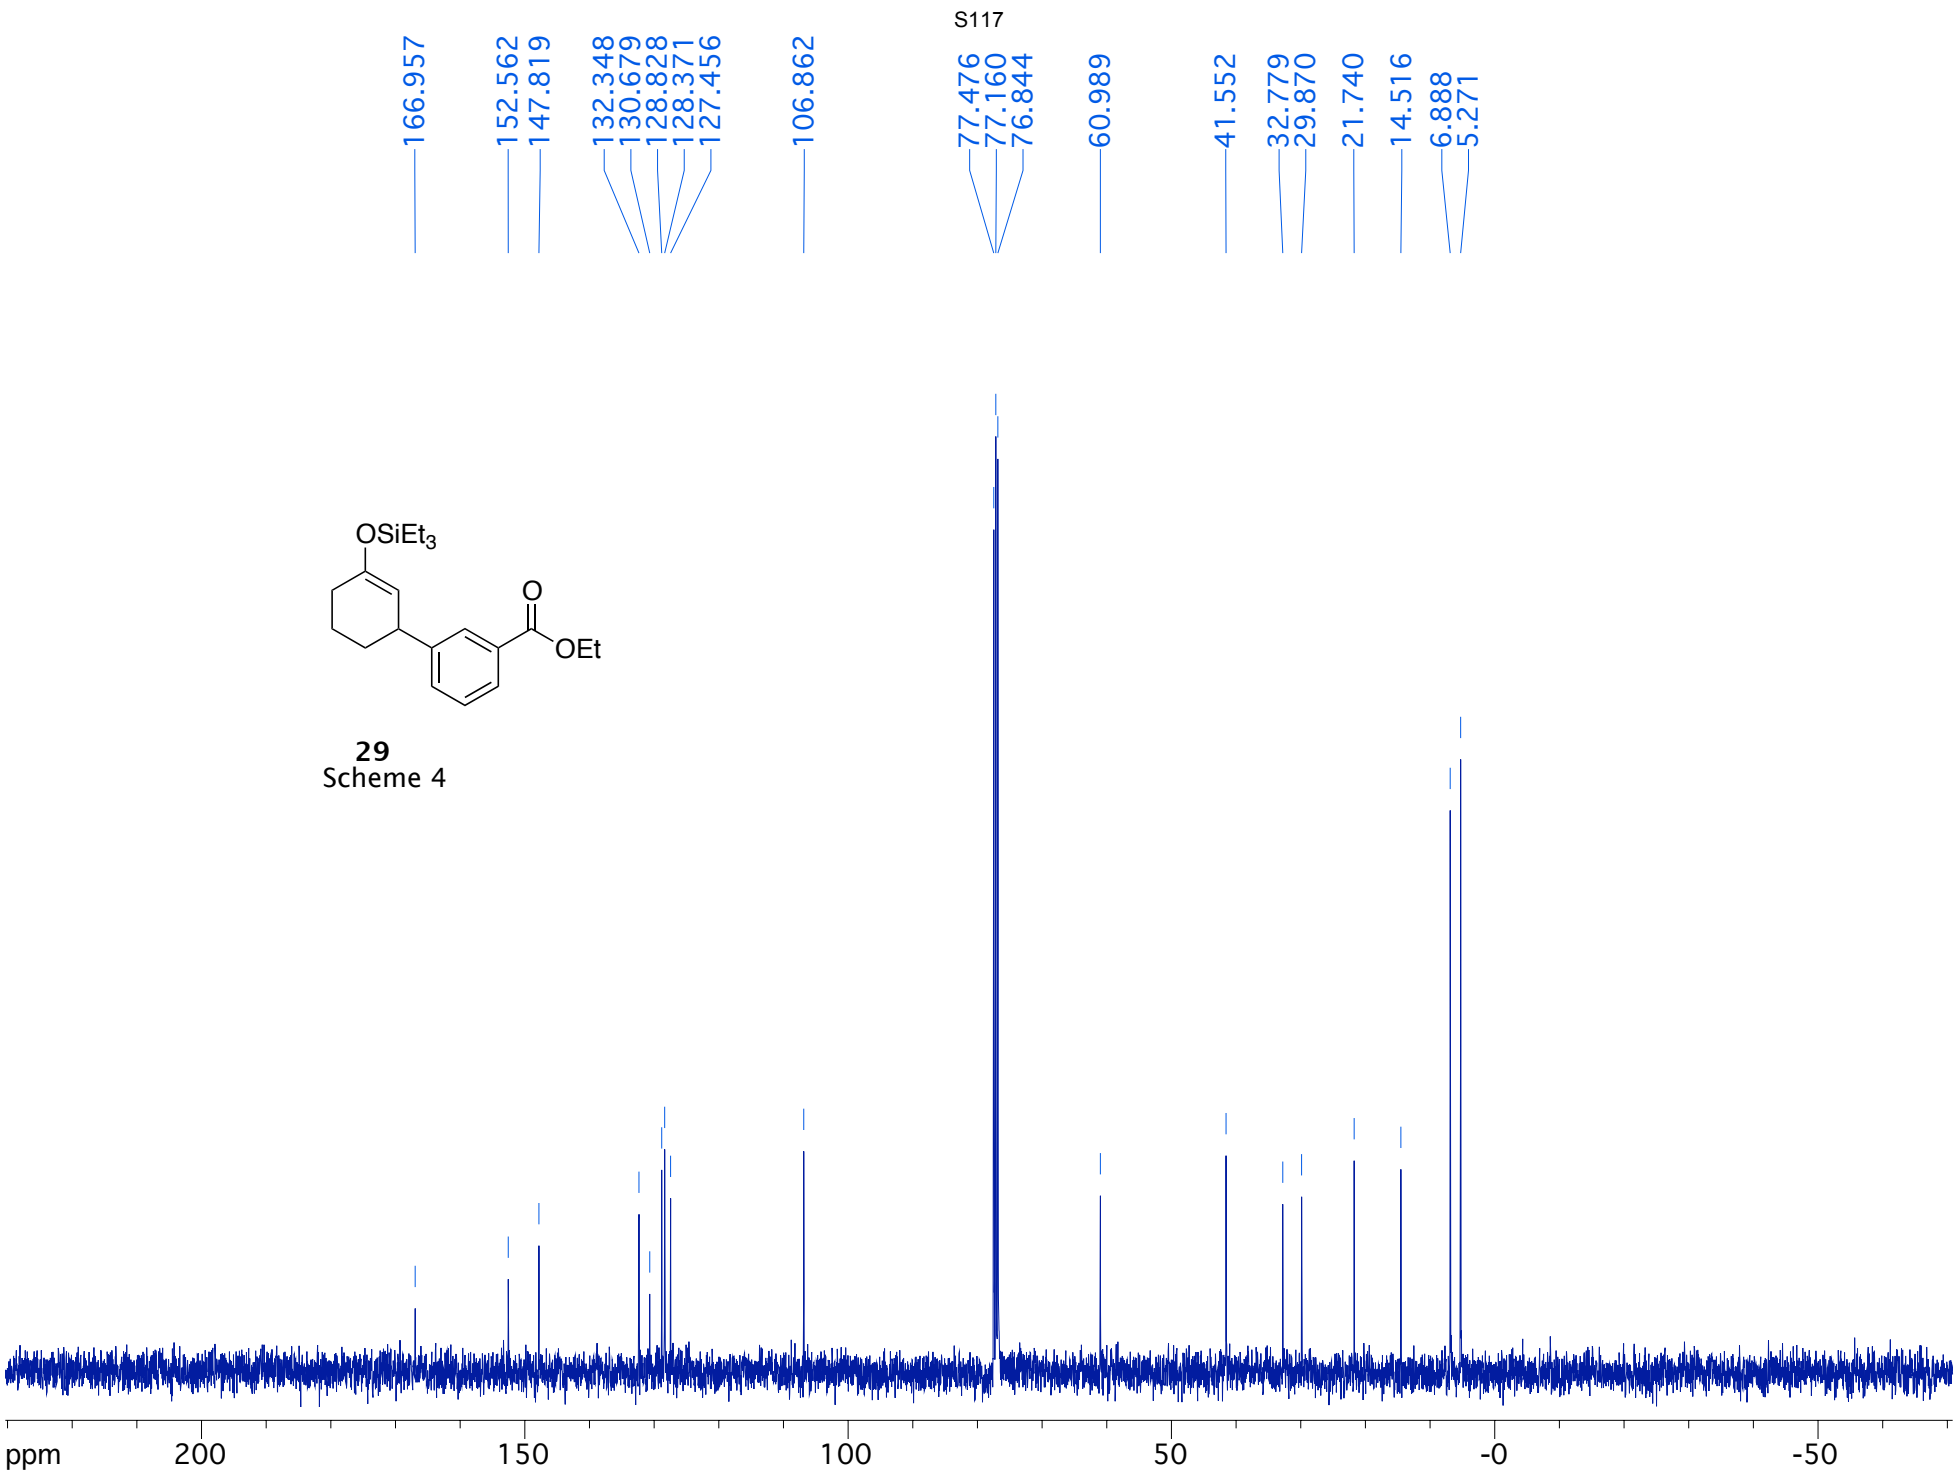

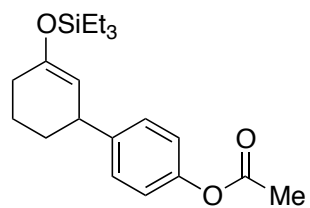

**30**  
Scheme 4

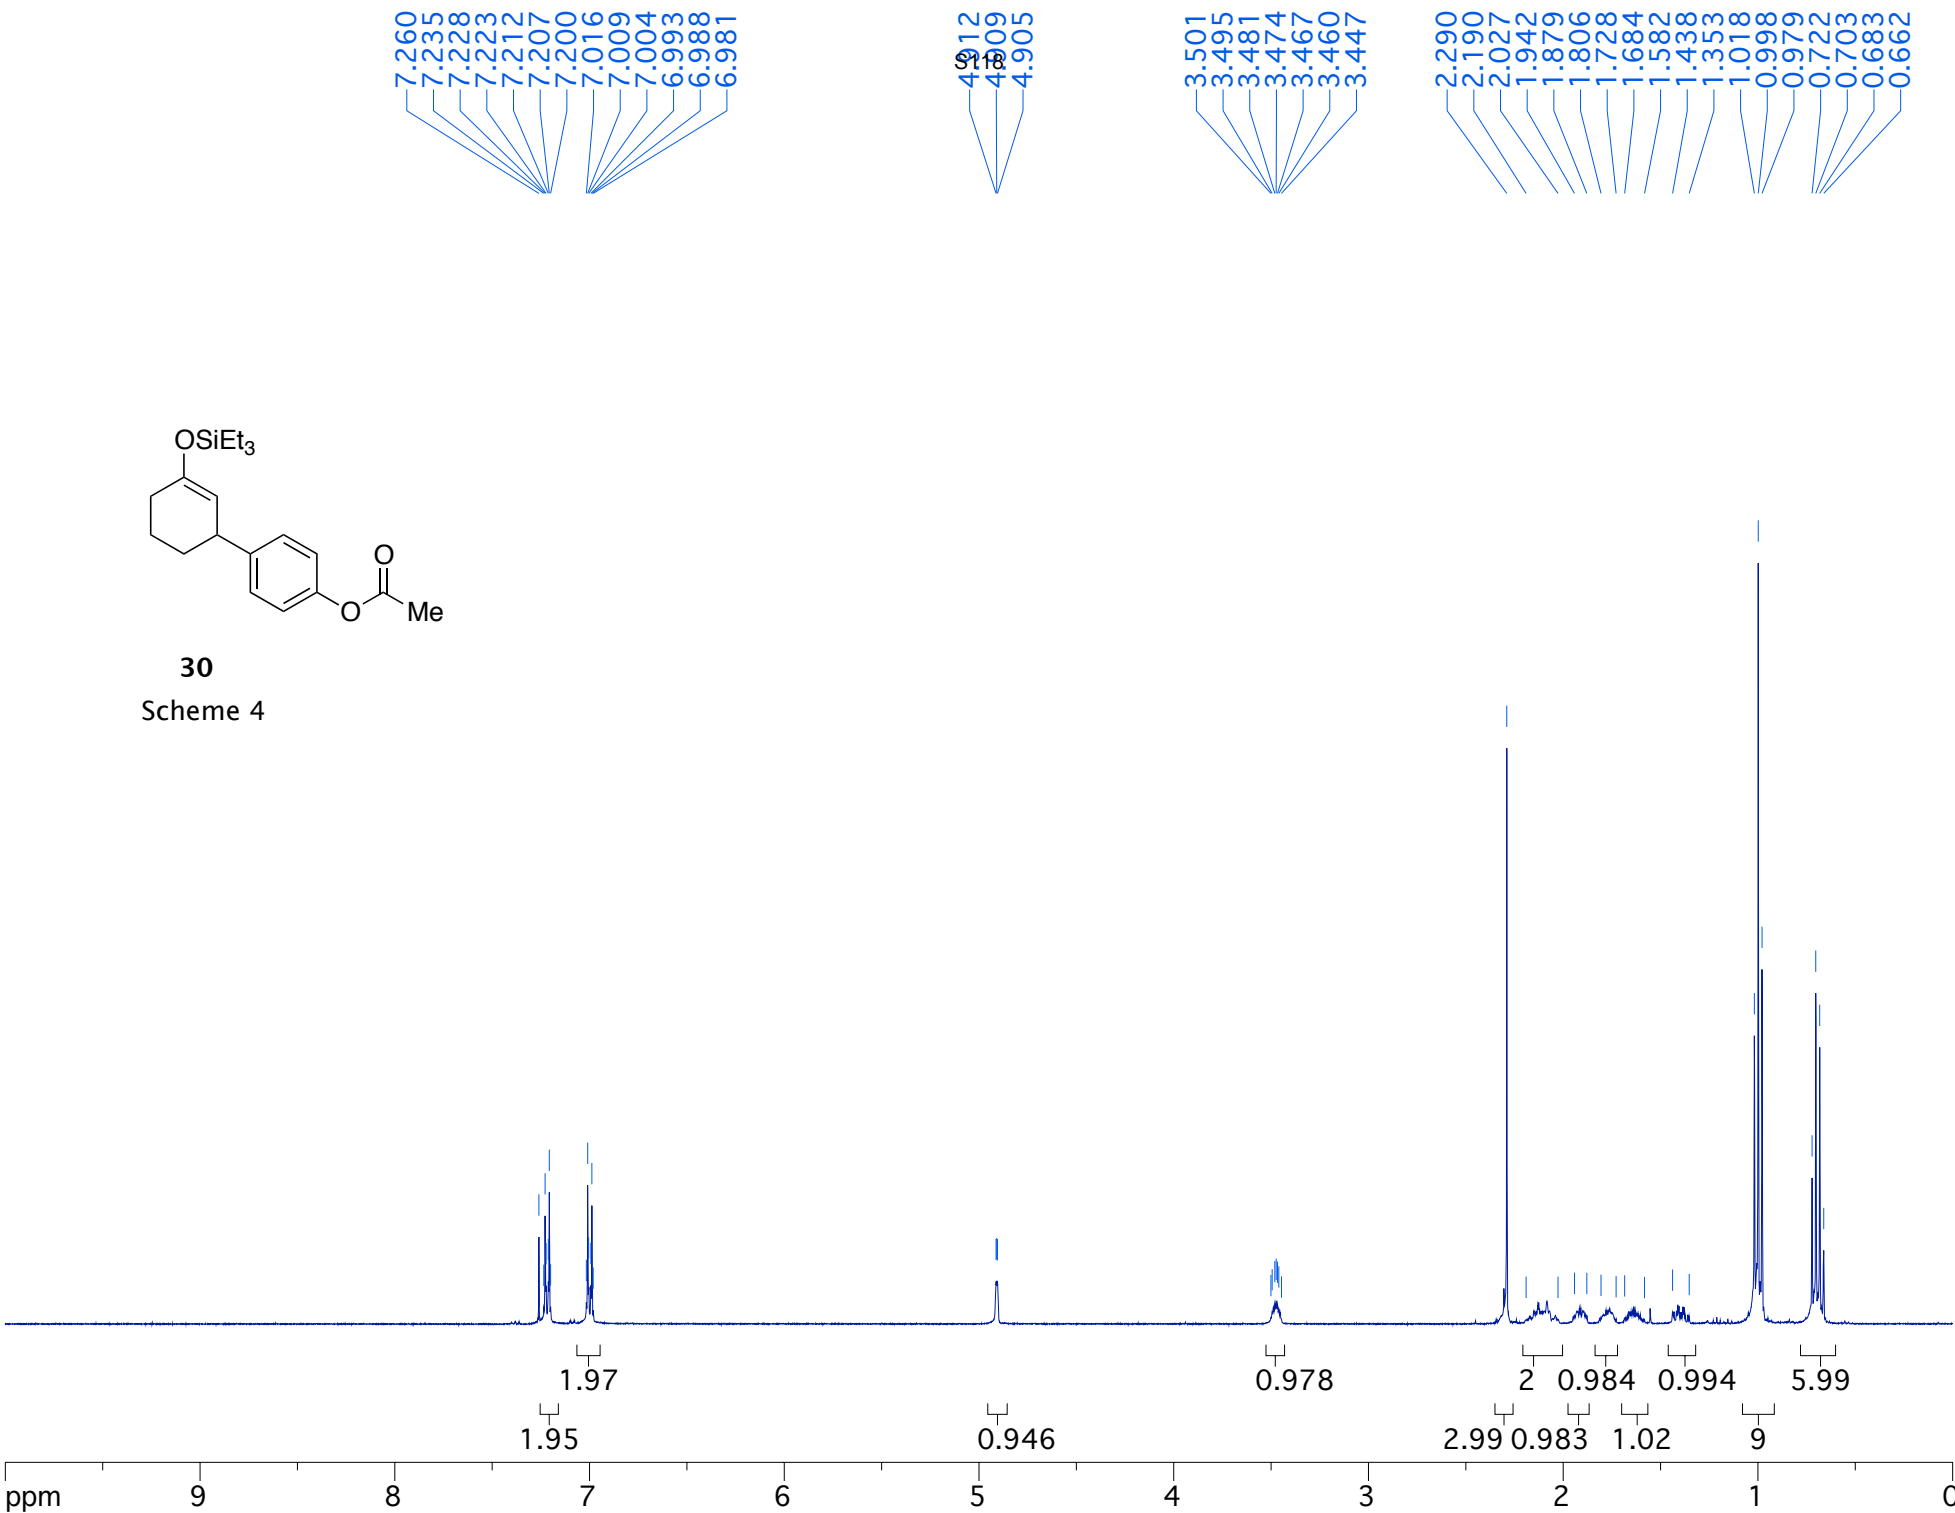

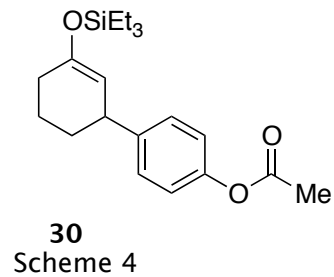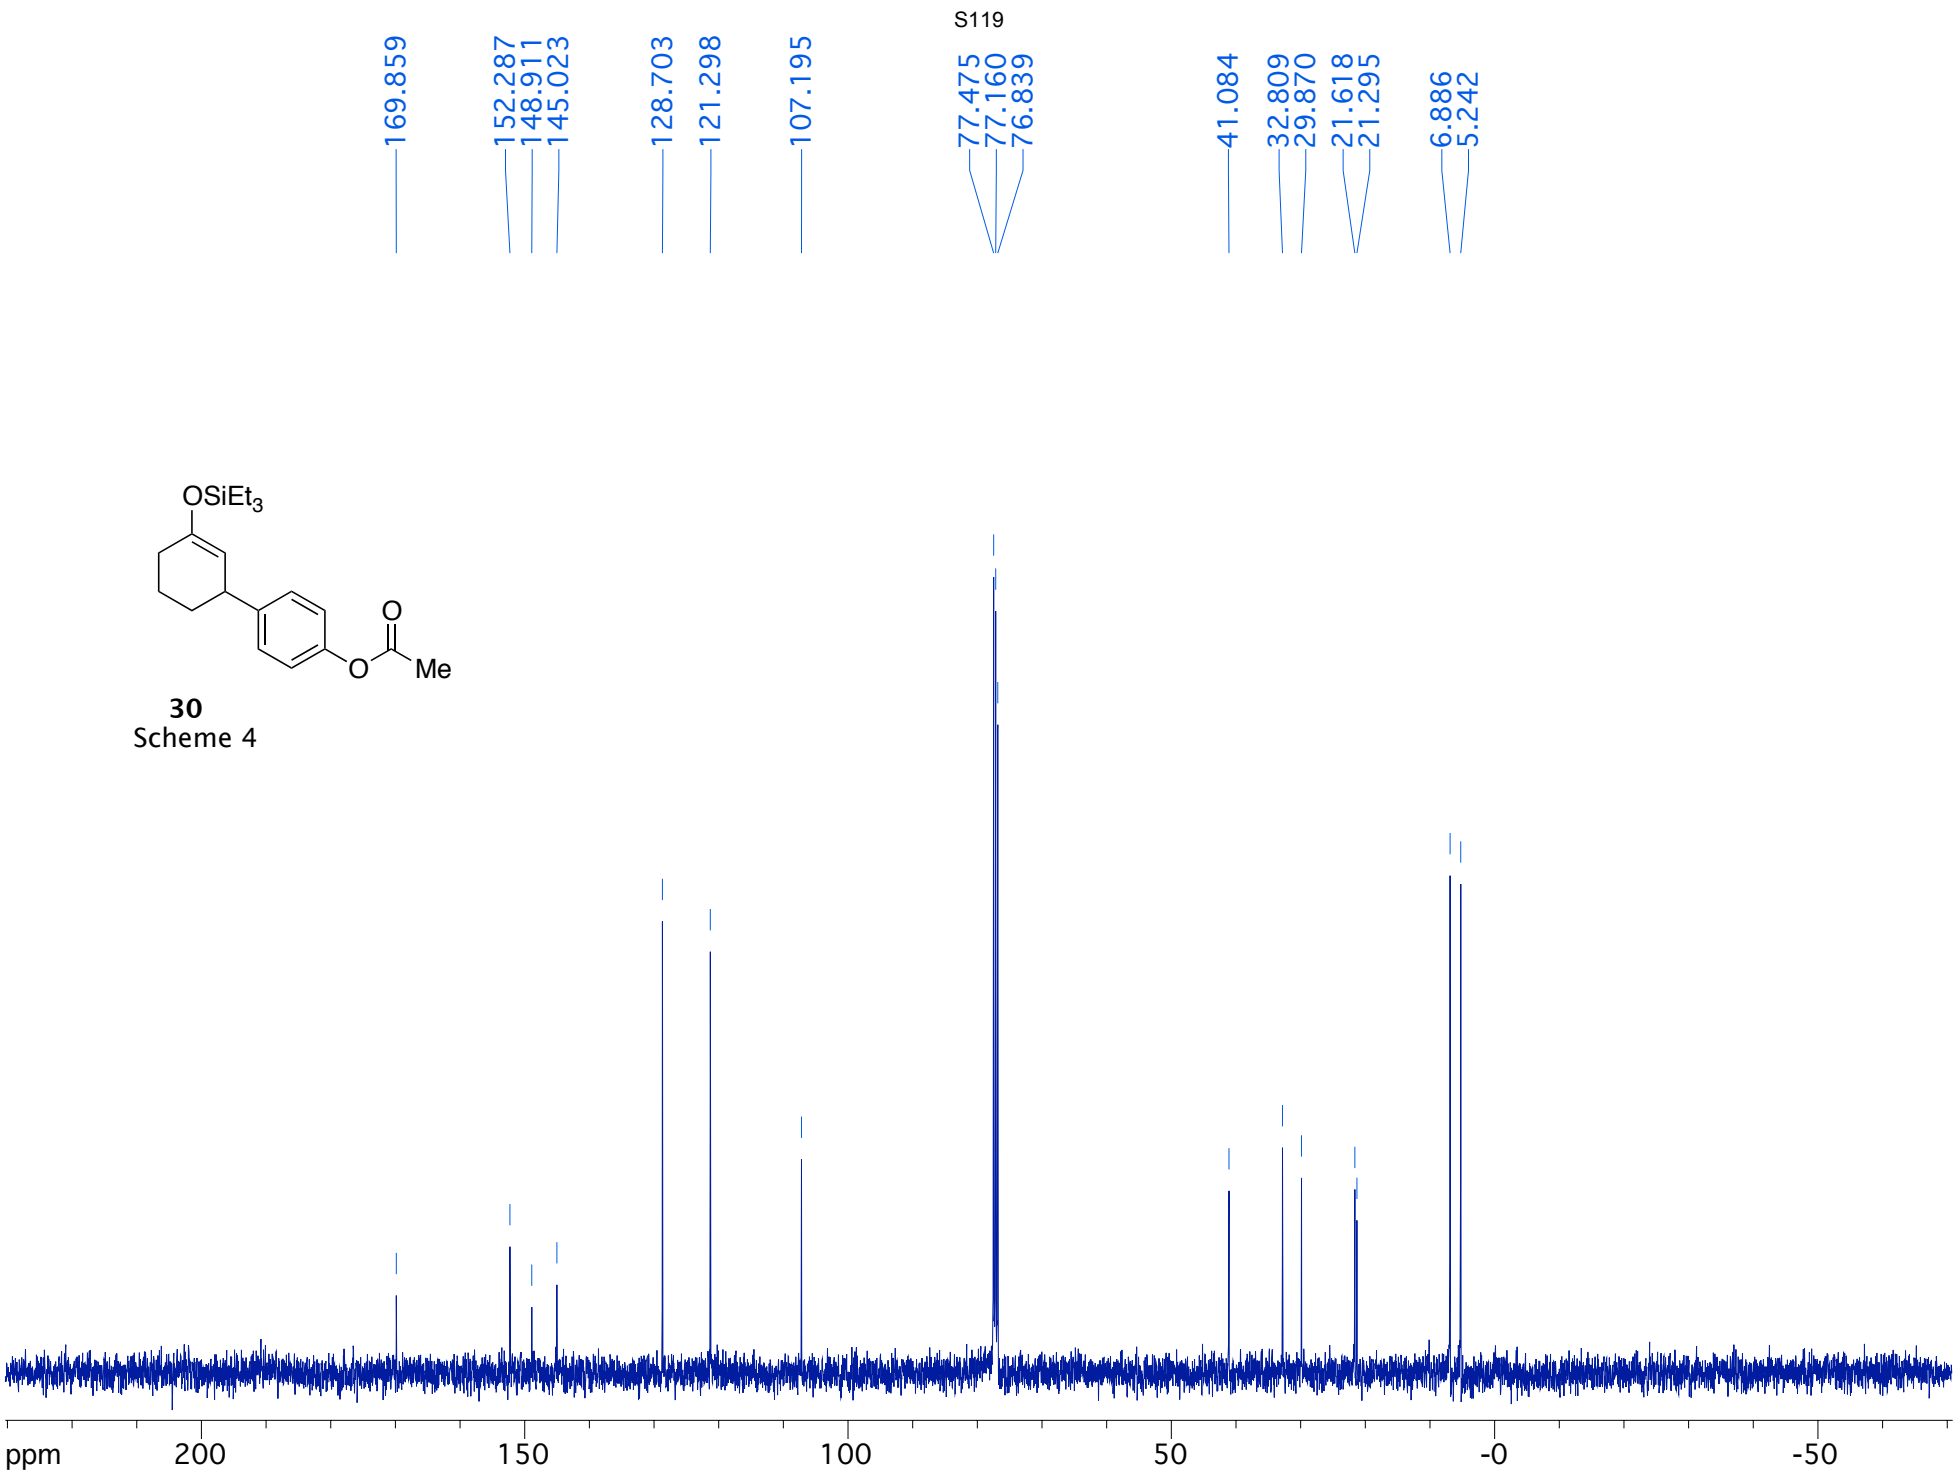

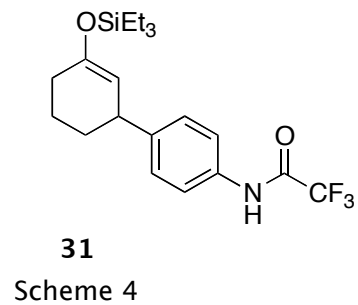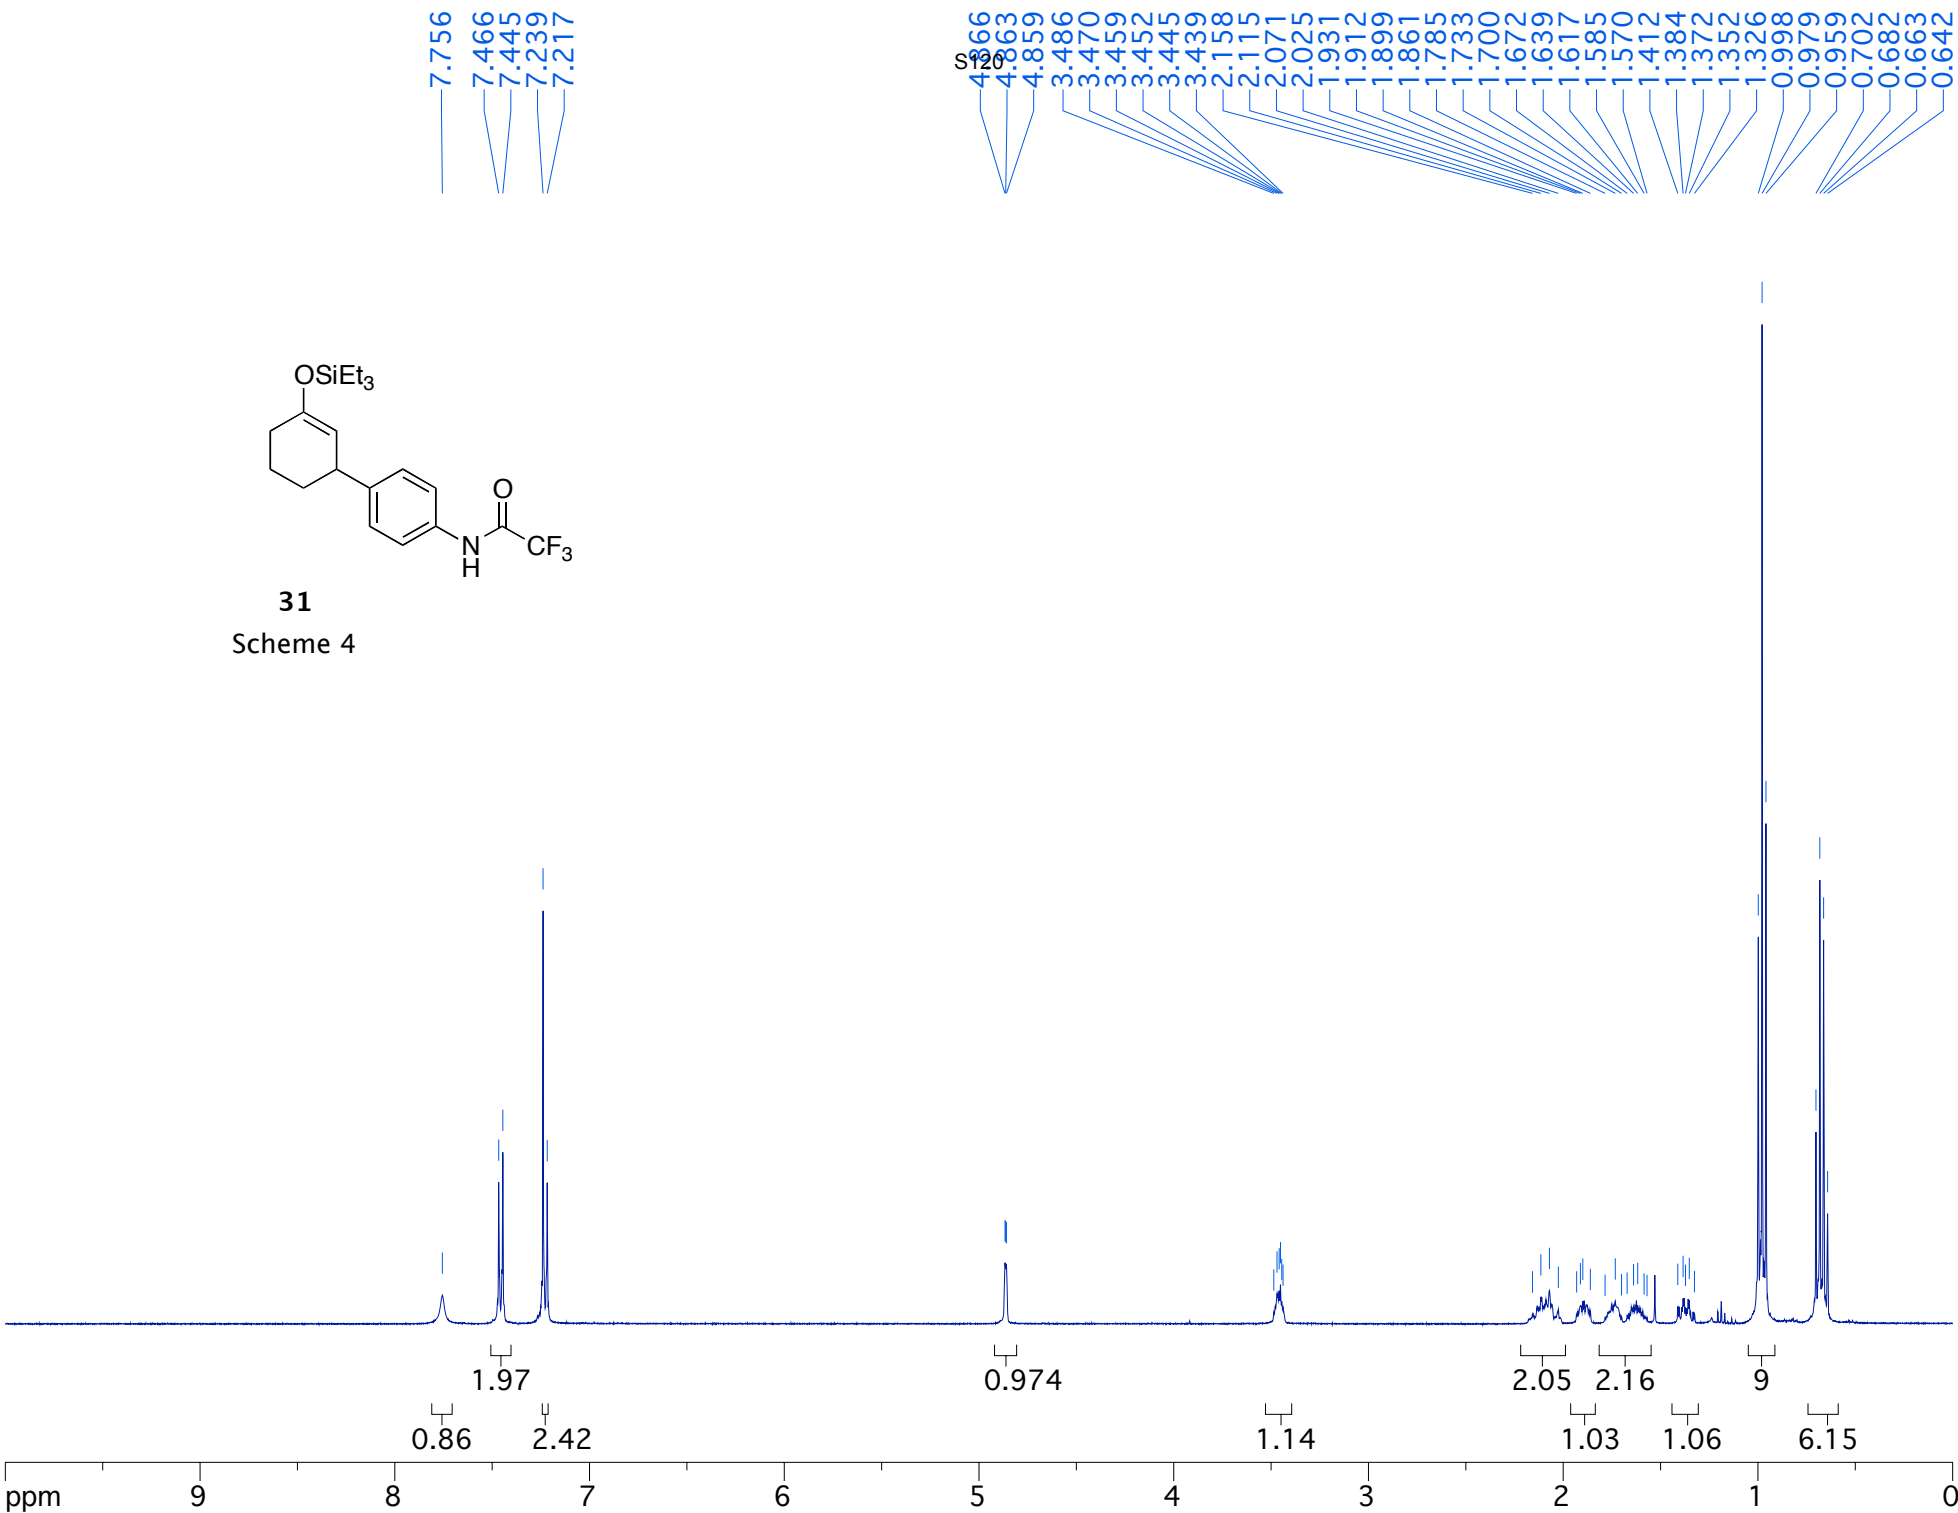

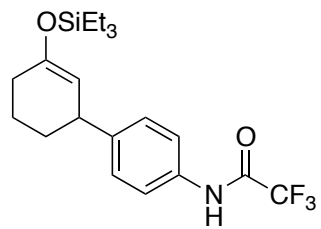

**31**

Scheme 4

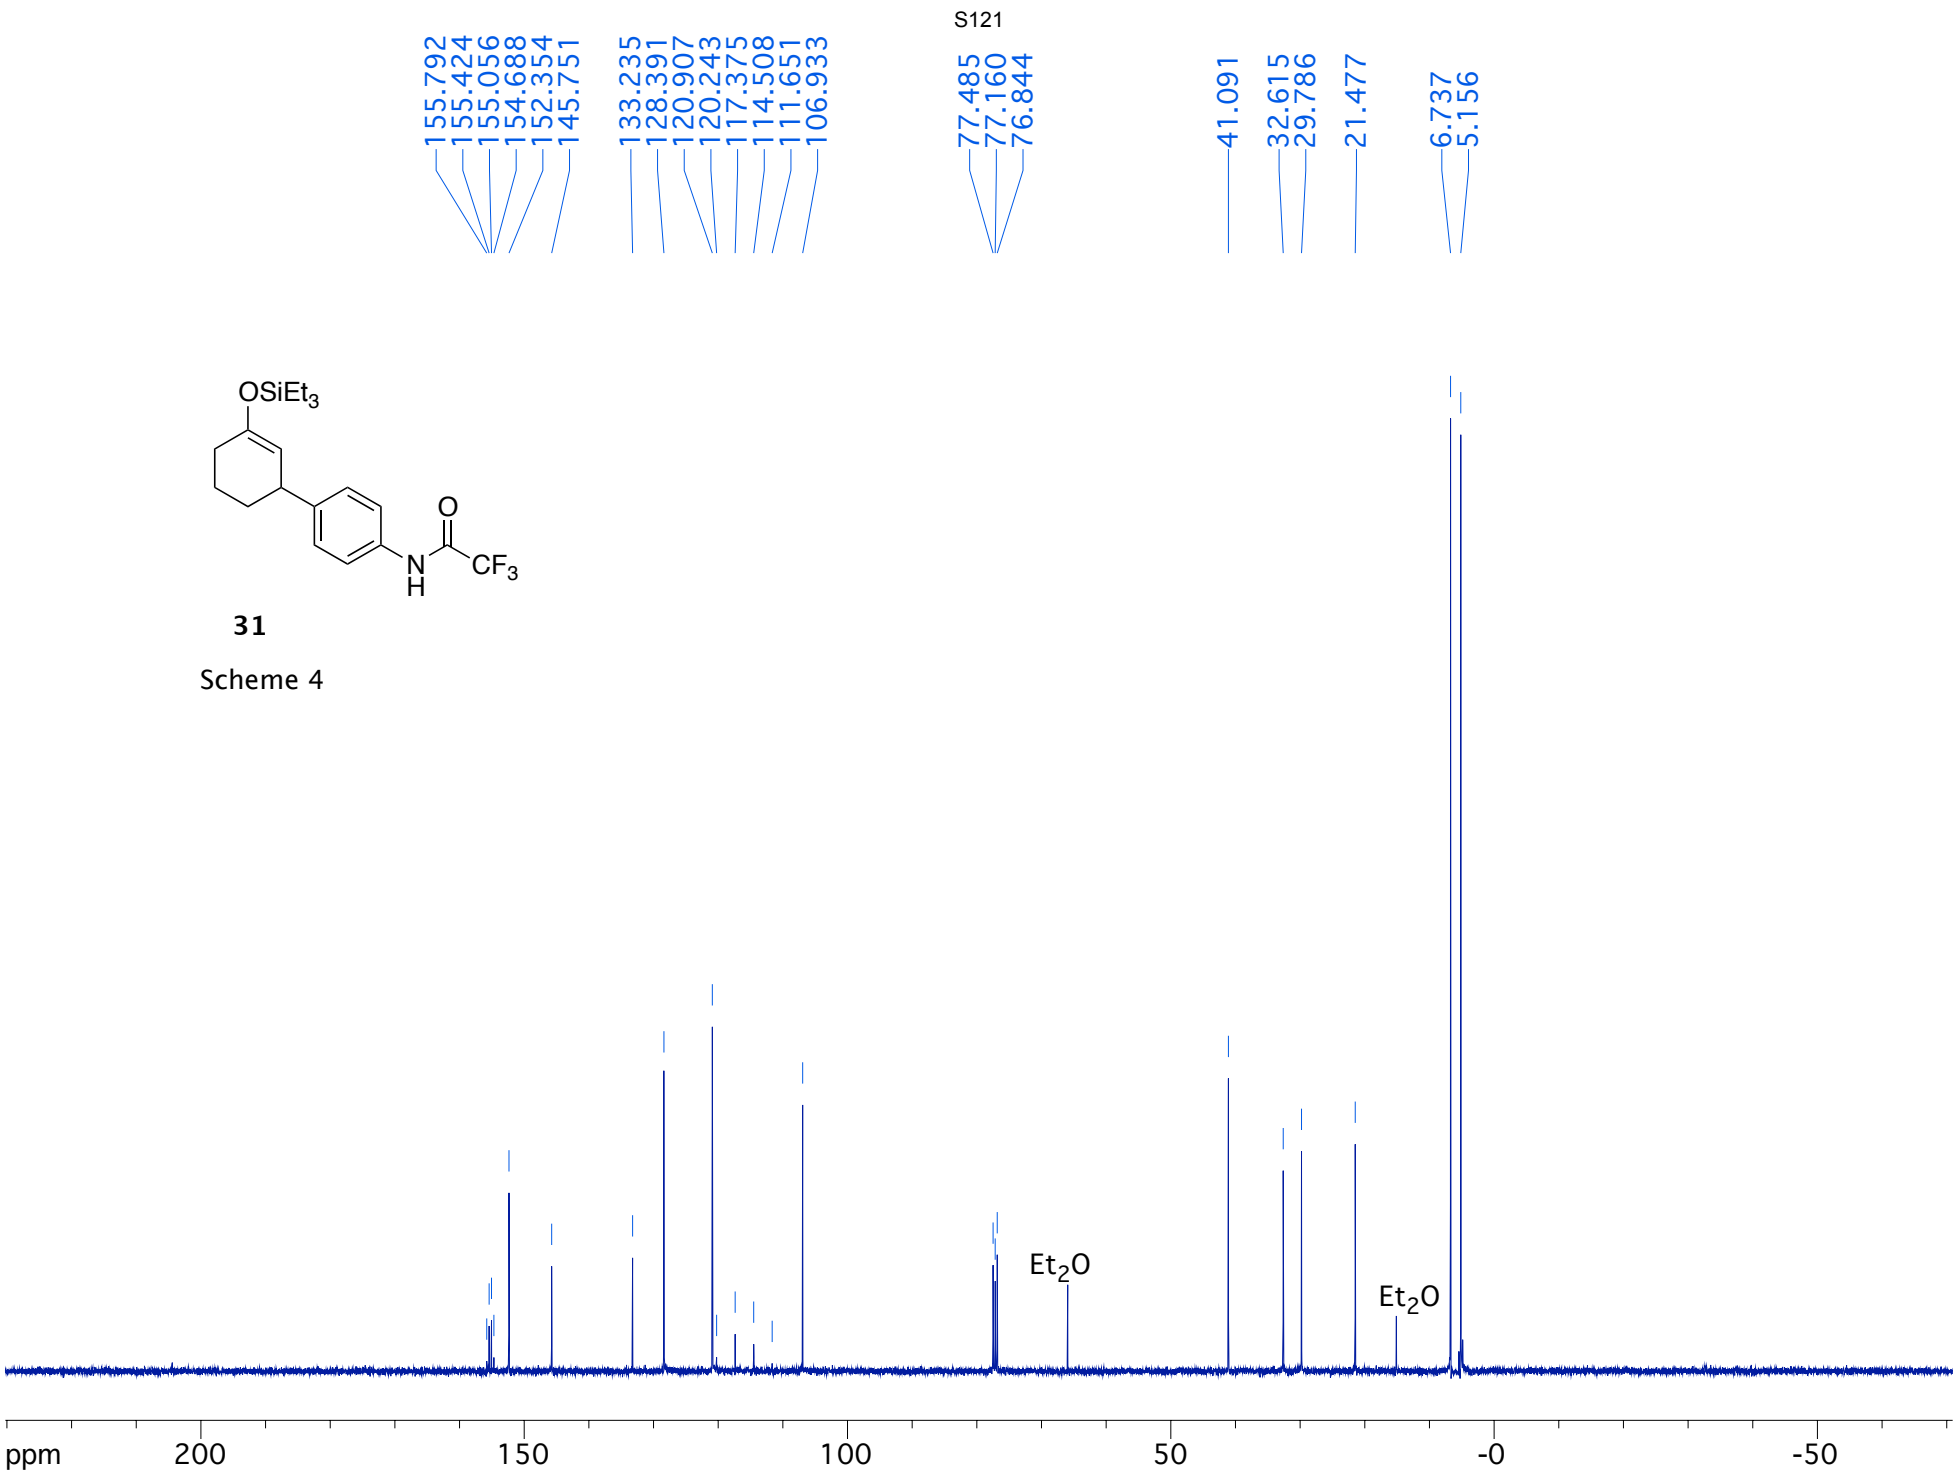

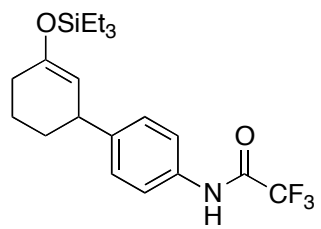

**31**  
Scheme 4

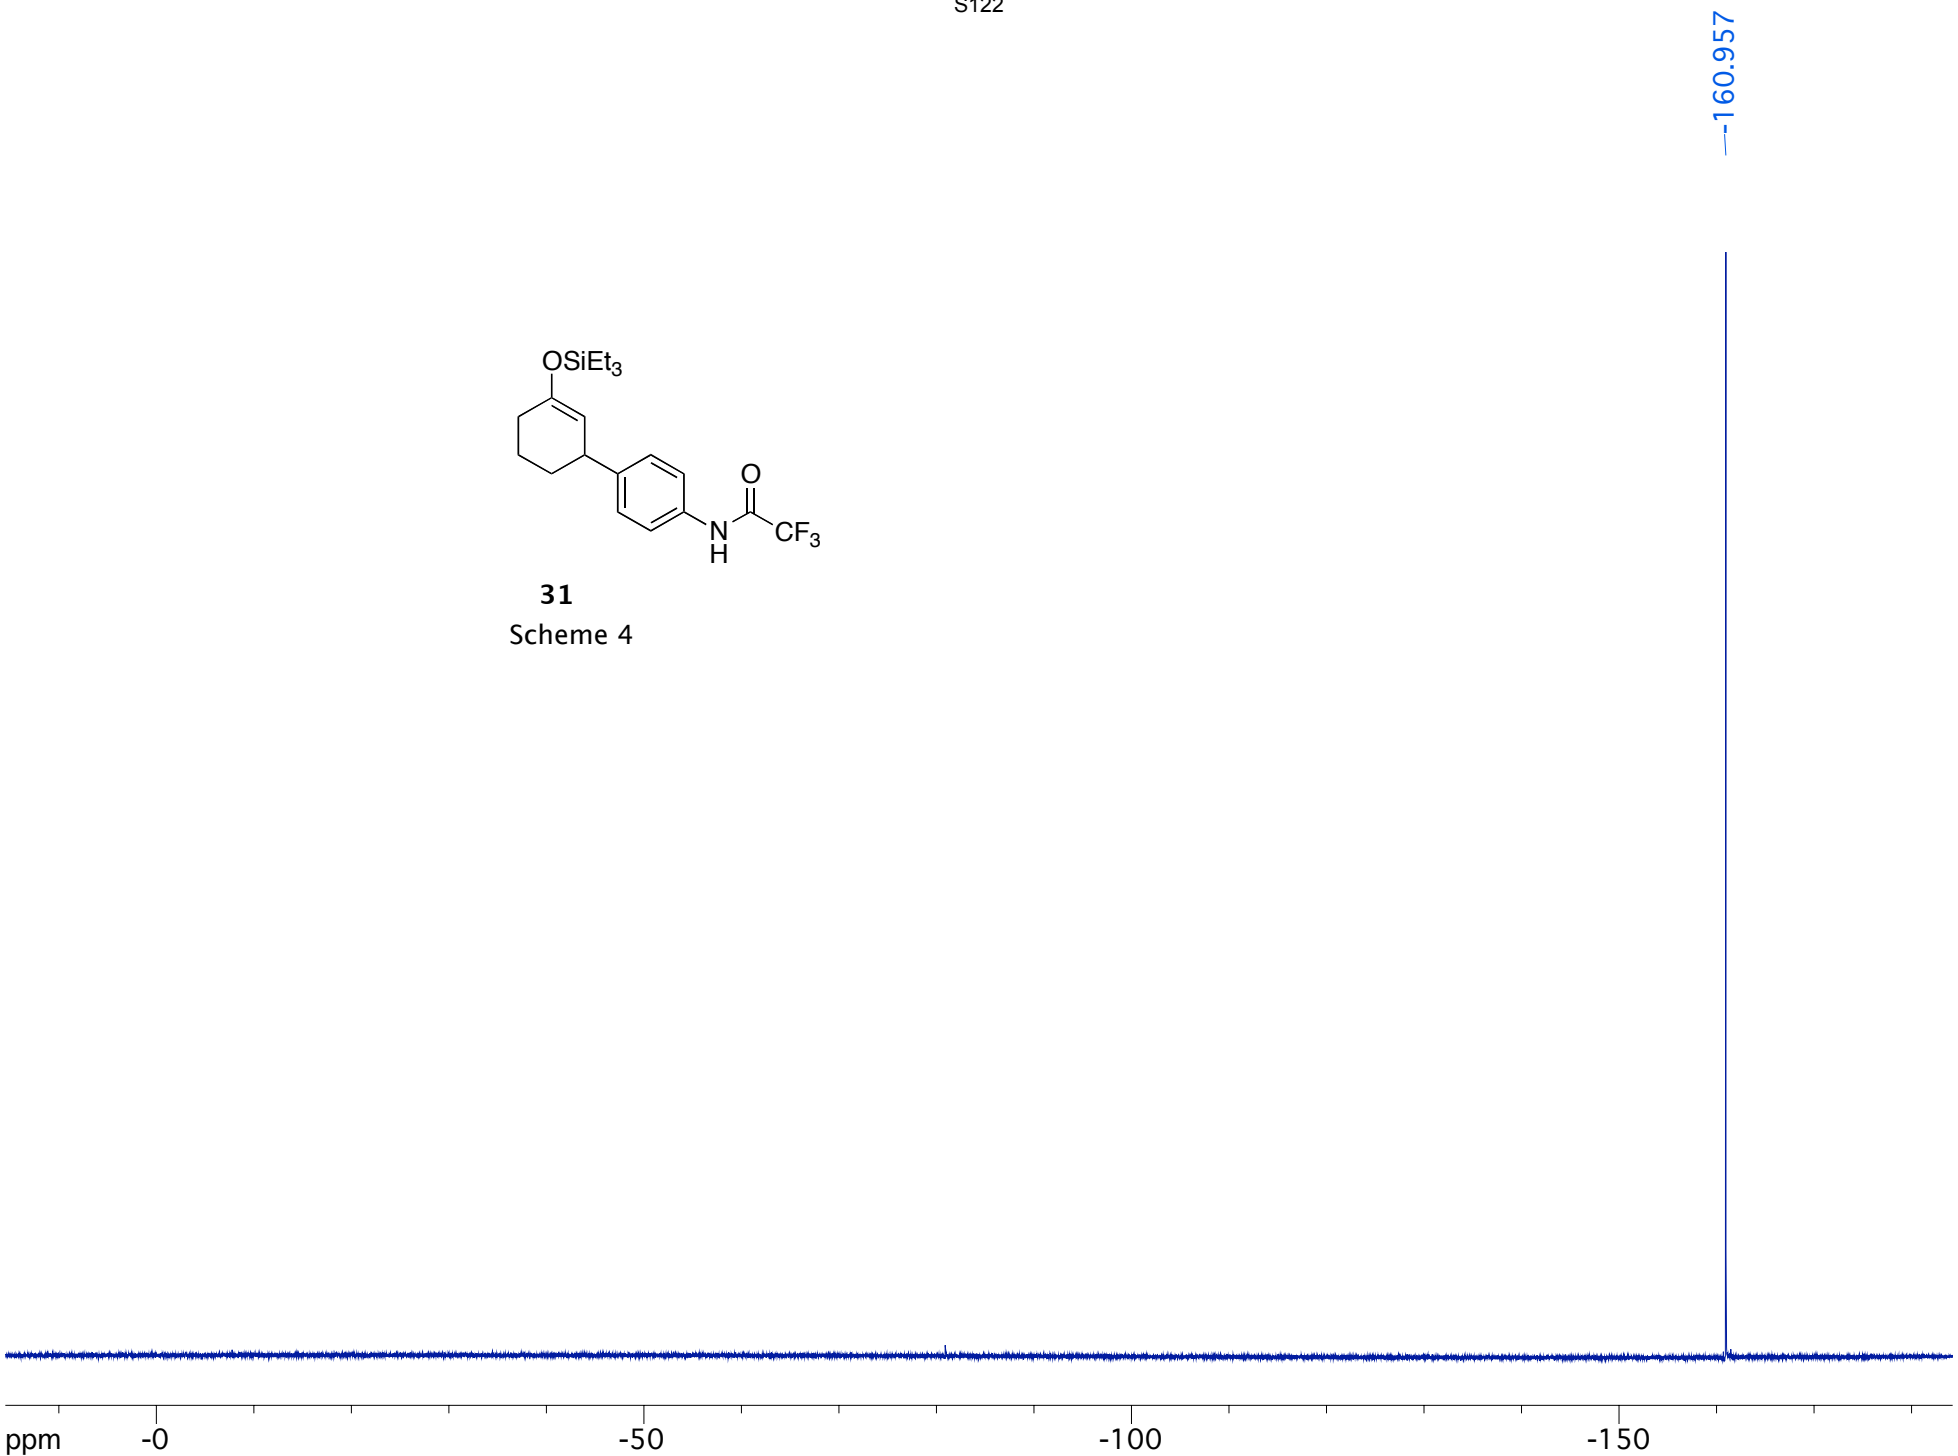



7.260  
6.831  
6.829  
6.744  
6.729  
6.724  
6.720  
6.686  
6.670  
6.667  
6.666  
5.943  
5.926  
5.923  
5.918  
5.915  
4.887  
4.883  
4.880  
4.422  
3.416  
3.411  
3.405  
3.400  
3.395  
3.389  
3.384  
3.378  
2.174  
2.157  
2.137  
2.120  
2.102  
2.079  
2.067  
2.023  
1.915  
1.909  
1.890  
1.873  
1.858  
1.800  
1.774  
1.748  
1.733  
1.663  
1.646  
1.631  
1.625  
1.608  
1.599  
1.581  
1.409  
1.403  
1.393  
1.383  
1.366  
1.362  
1.346  
1.340  
1.016  
1.000  
0.985  
0.718  
0.702  
0.686  
0.671

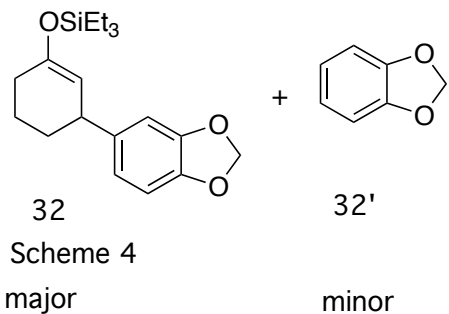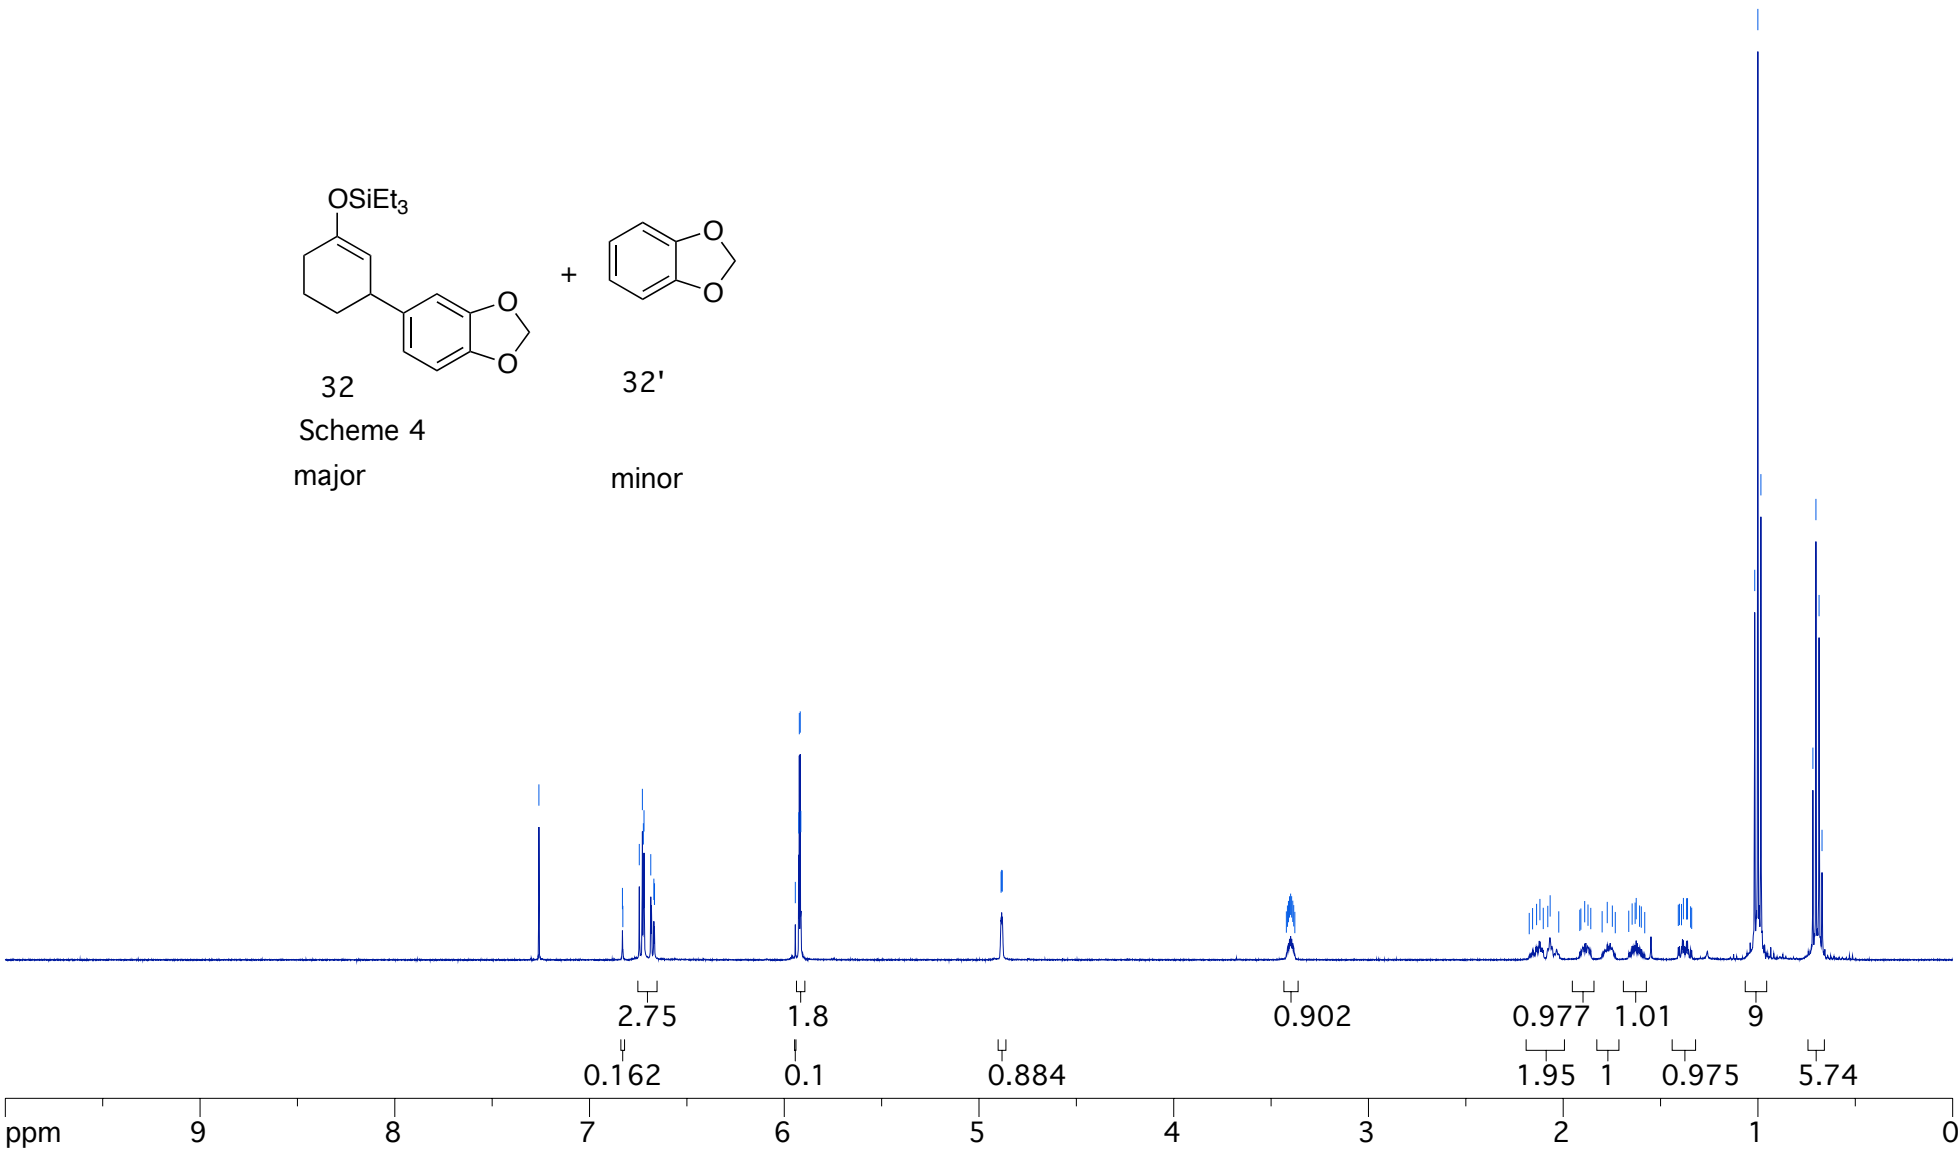

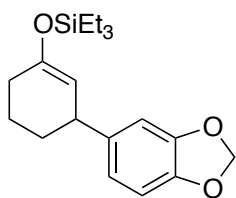

**32**  
Scheme 4

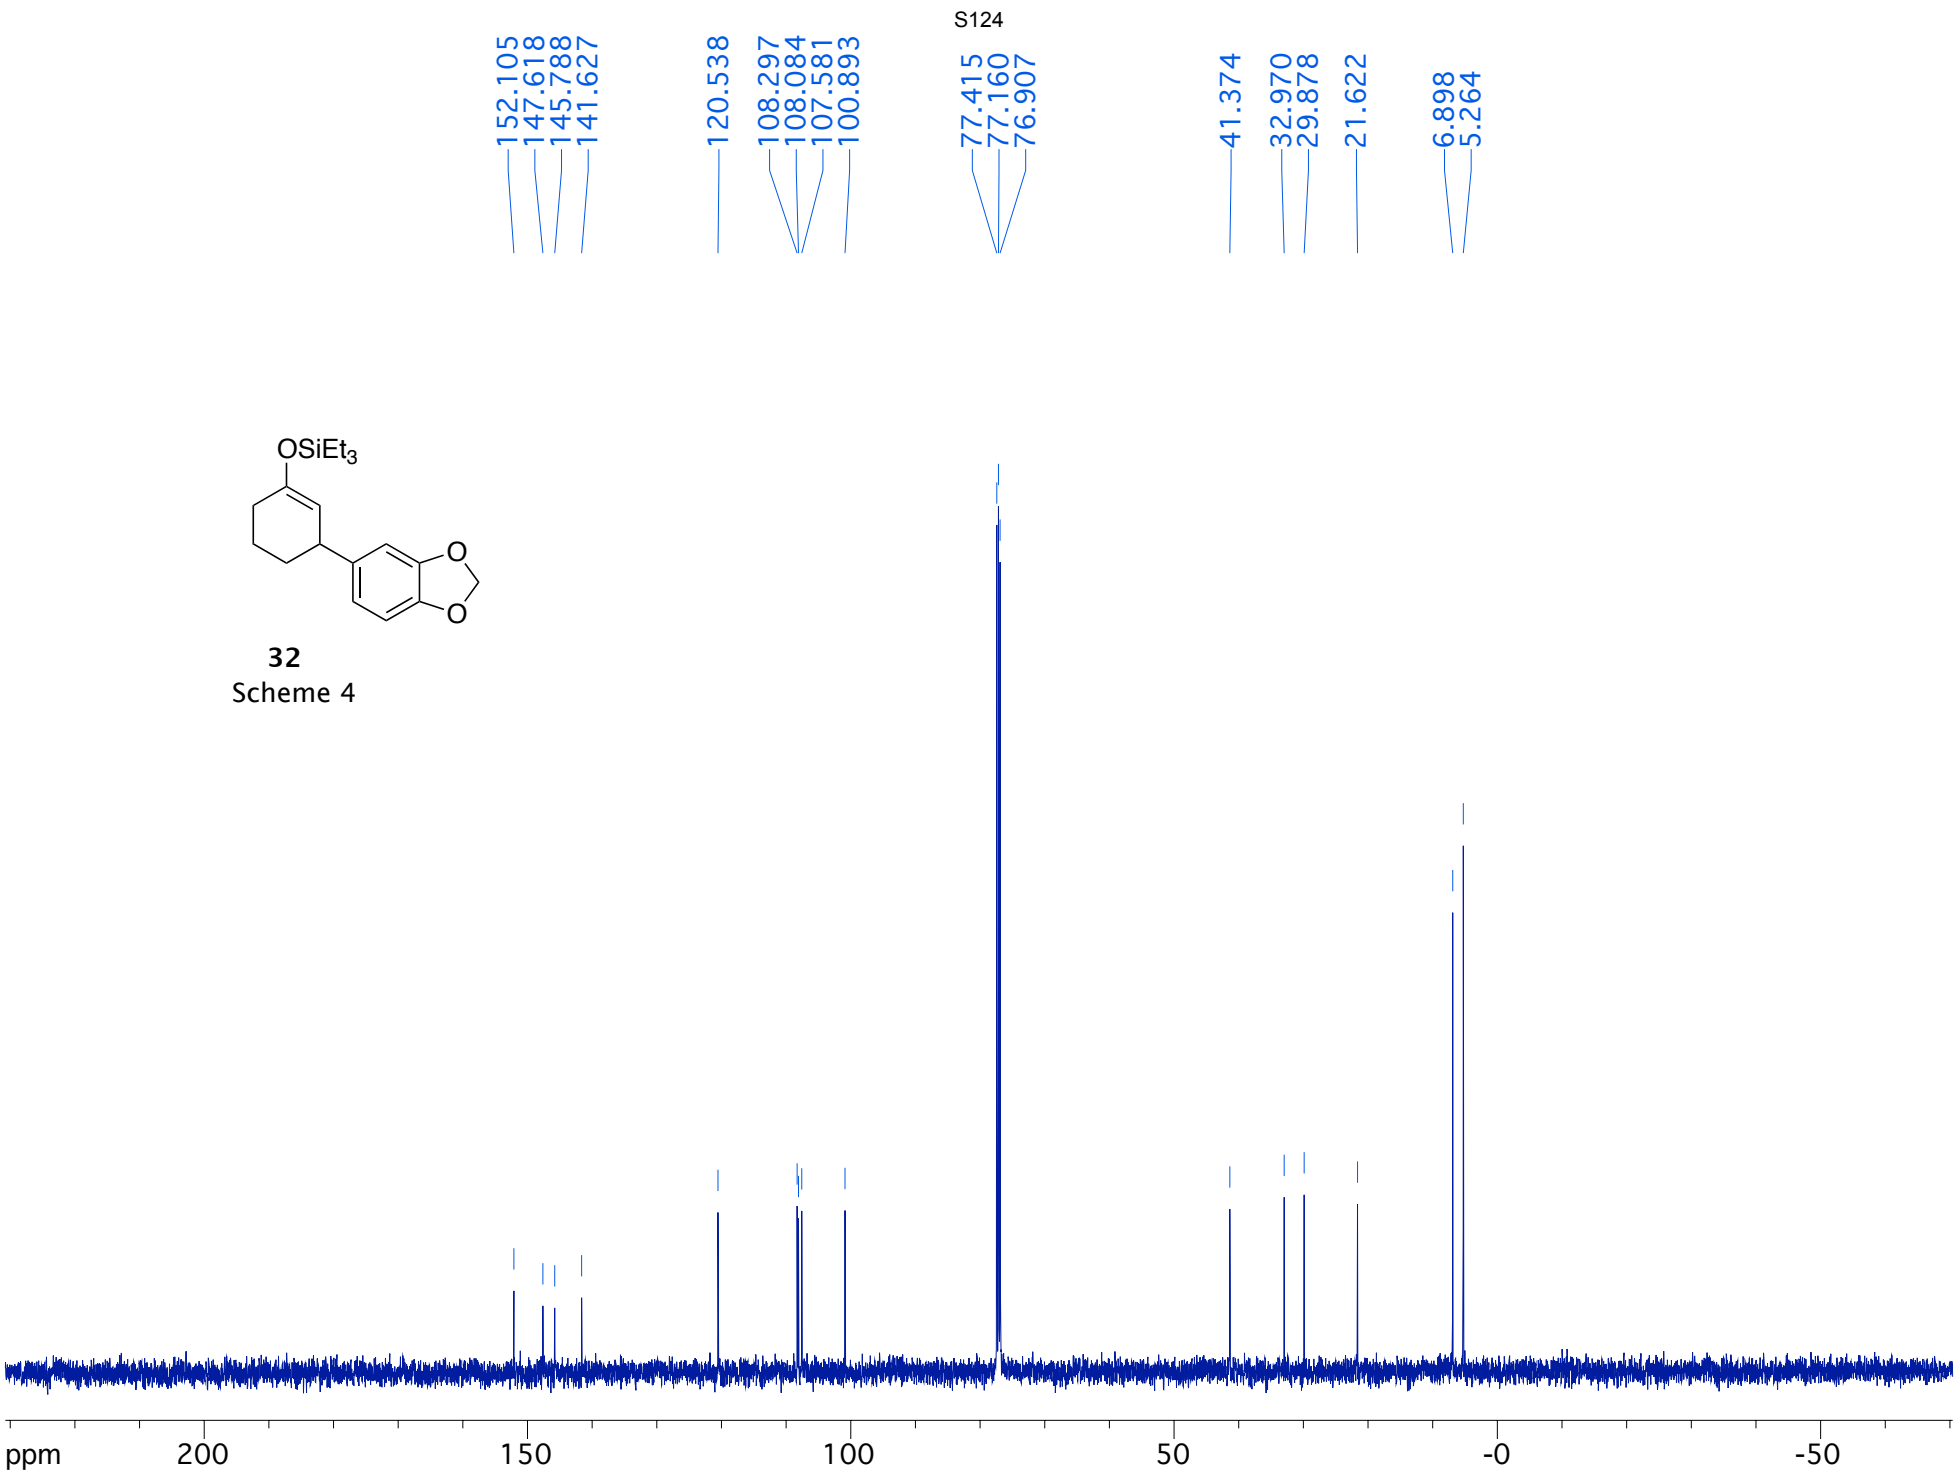

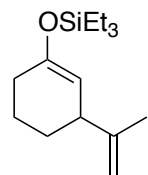

**33**  
Scheme 4

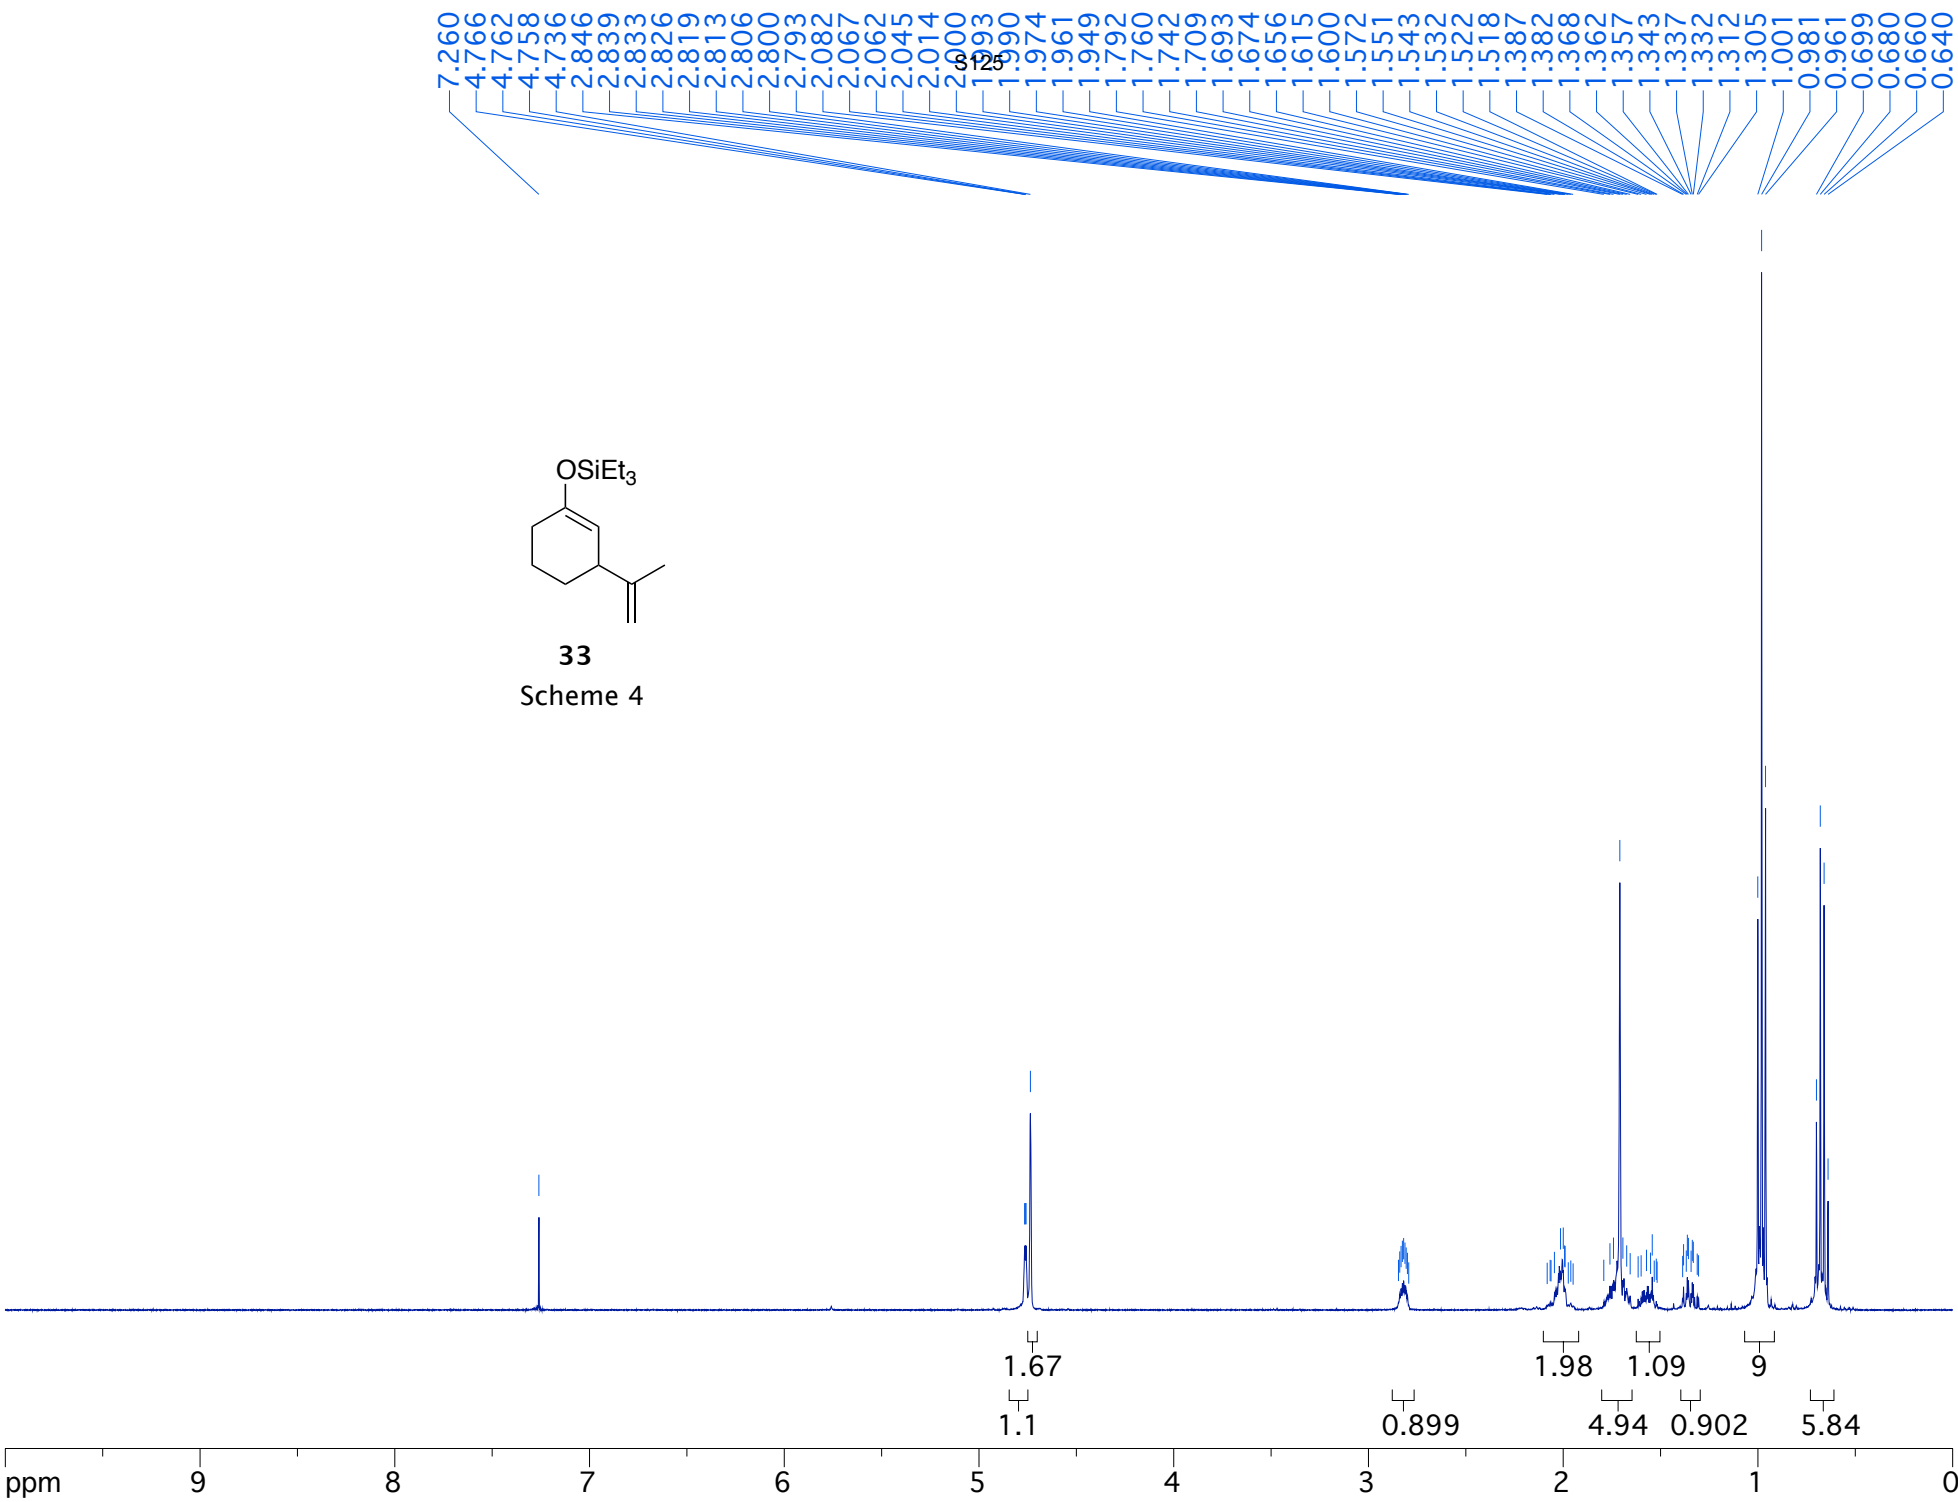

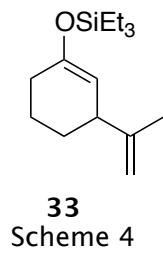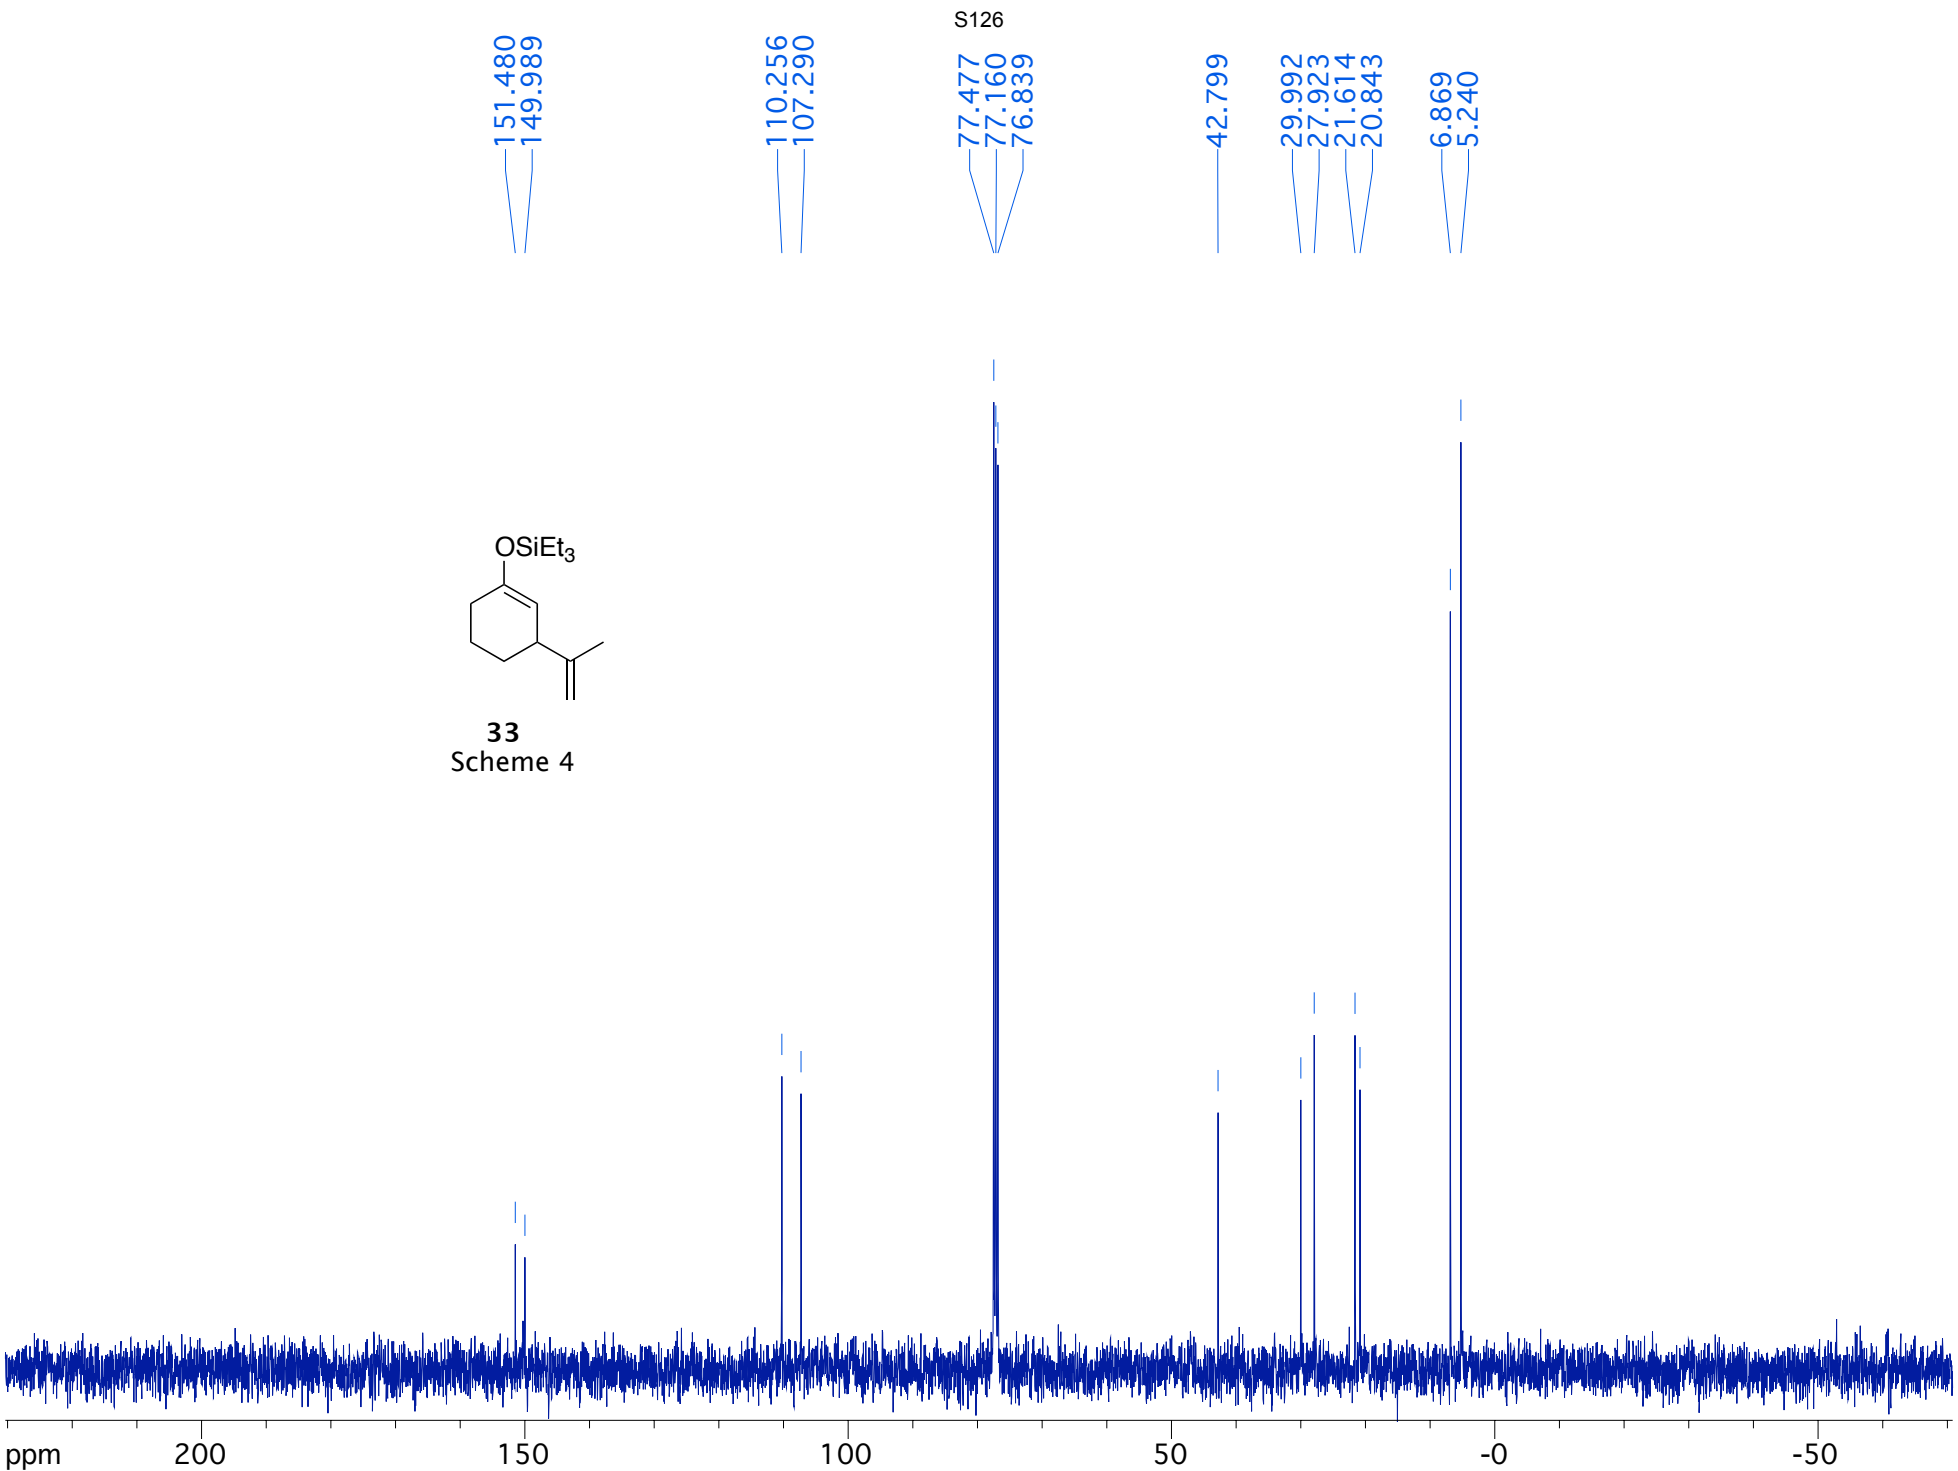

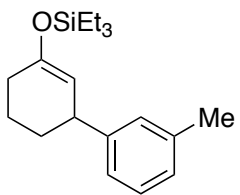

**34**  
Scheme 4

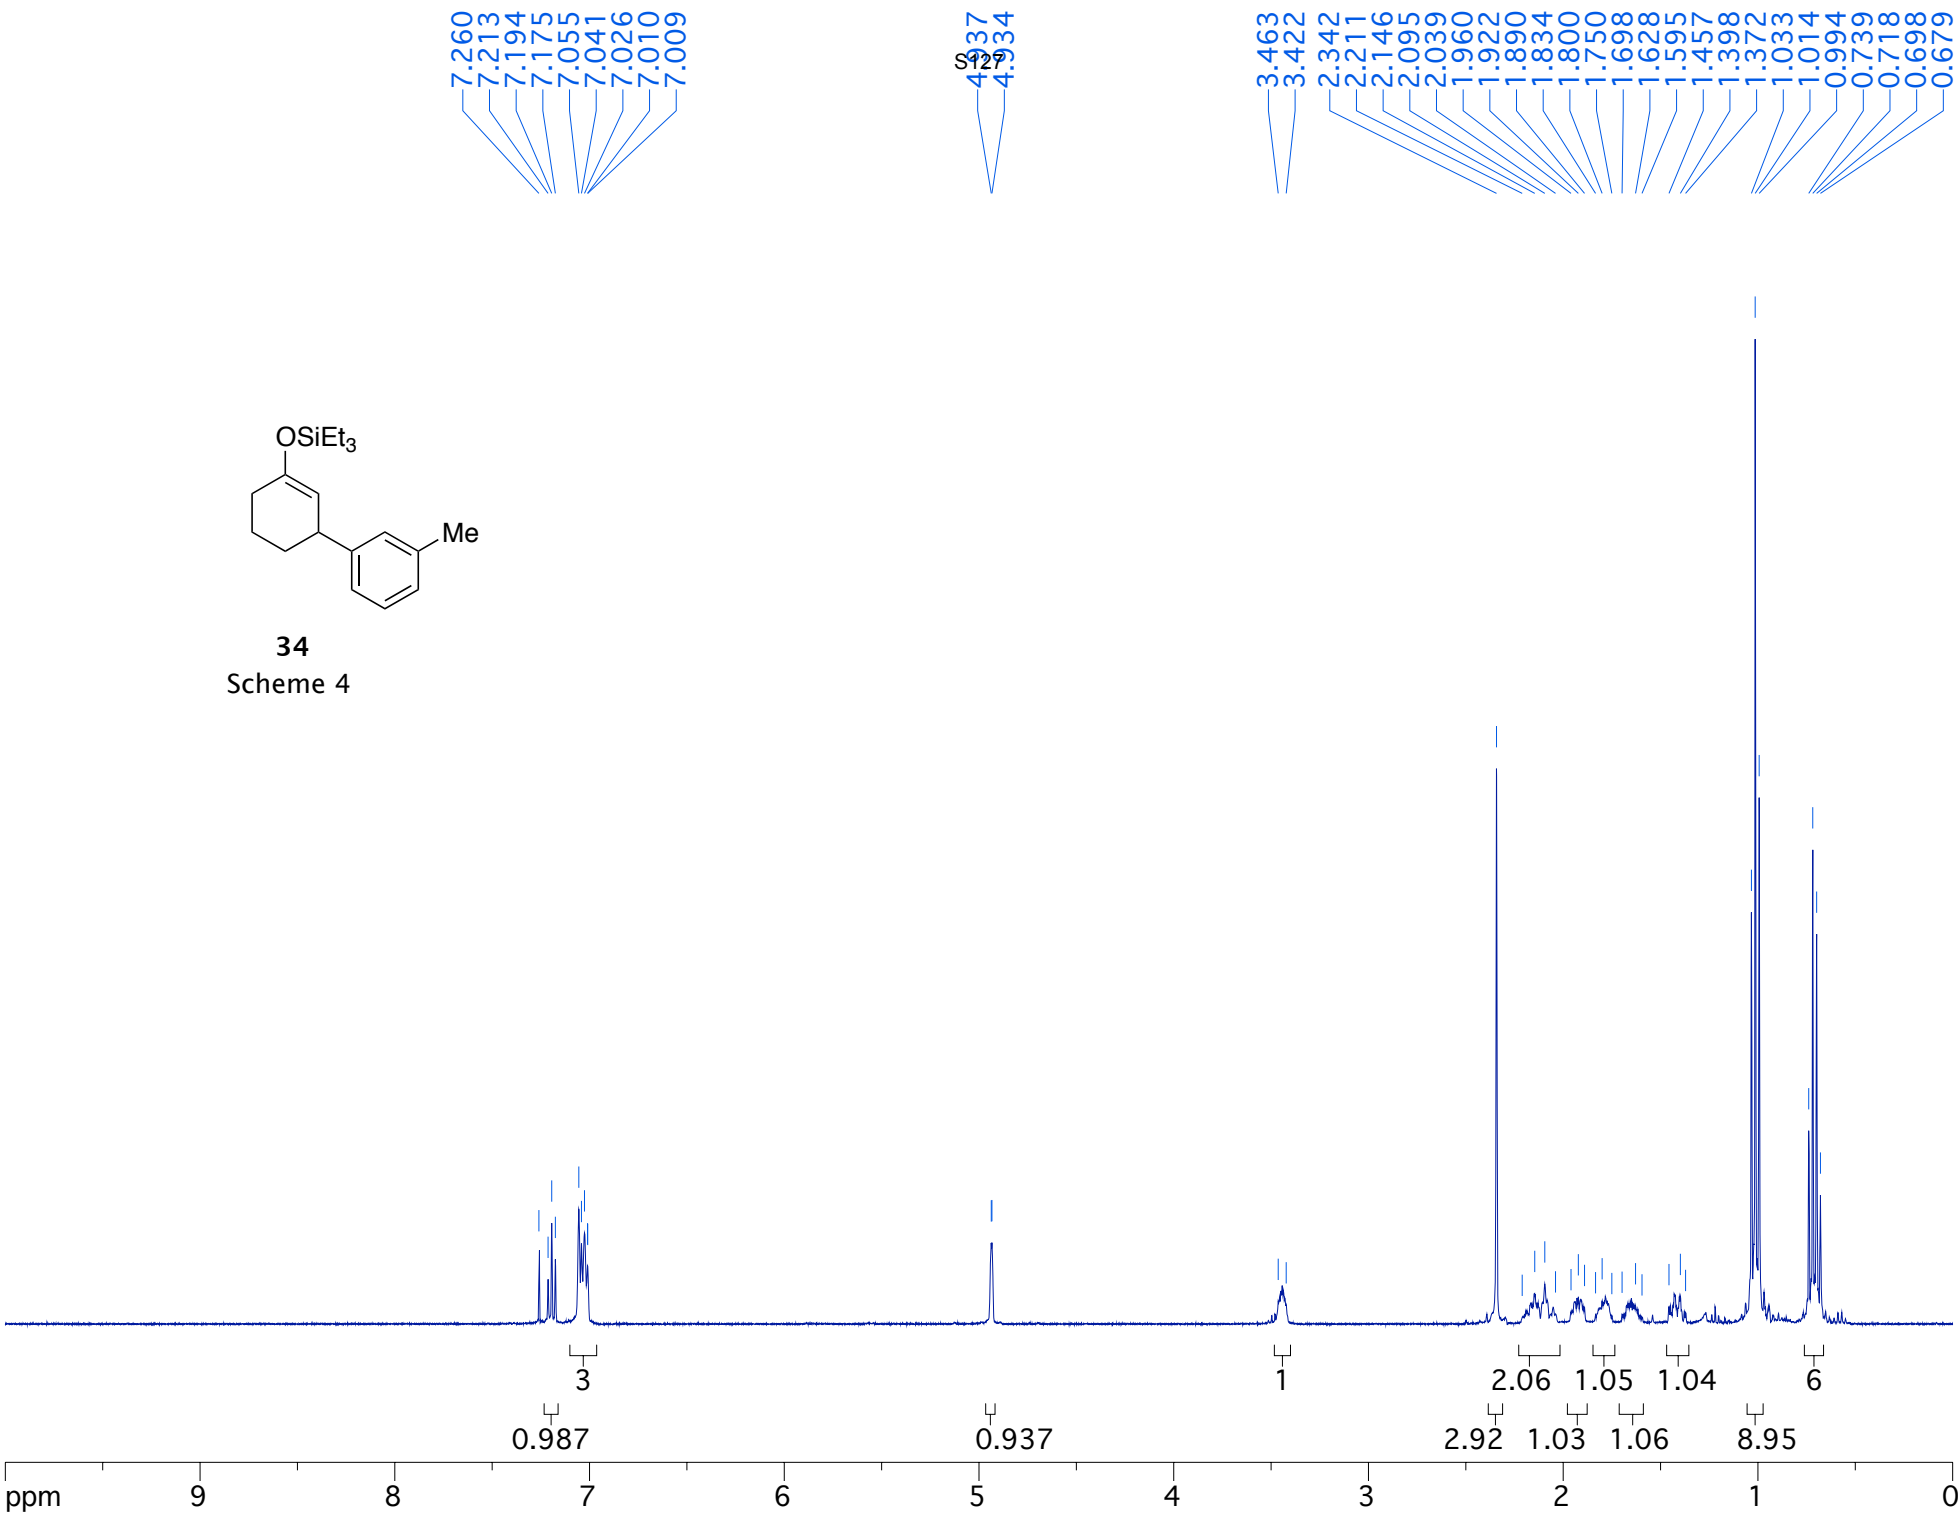

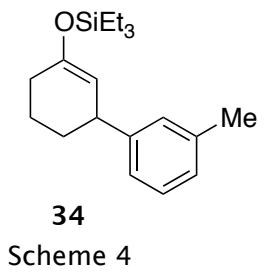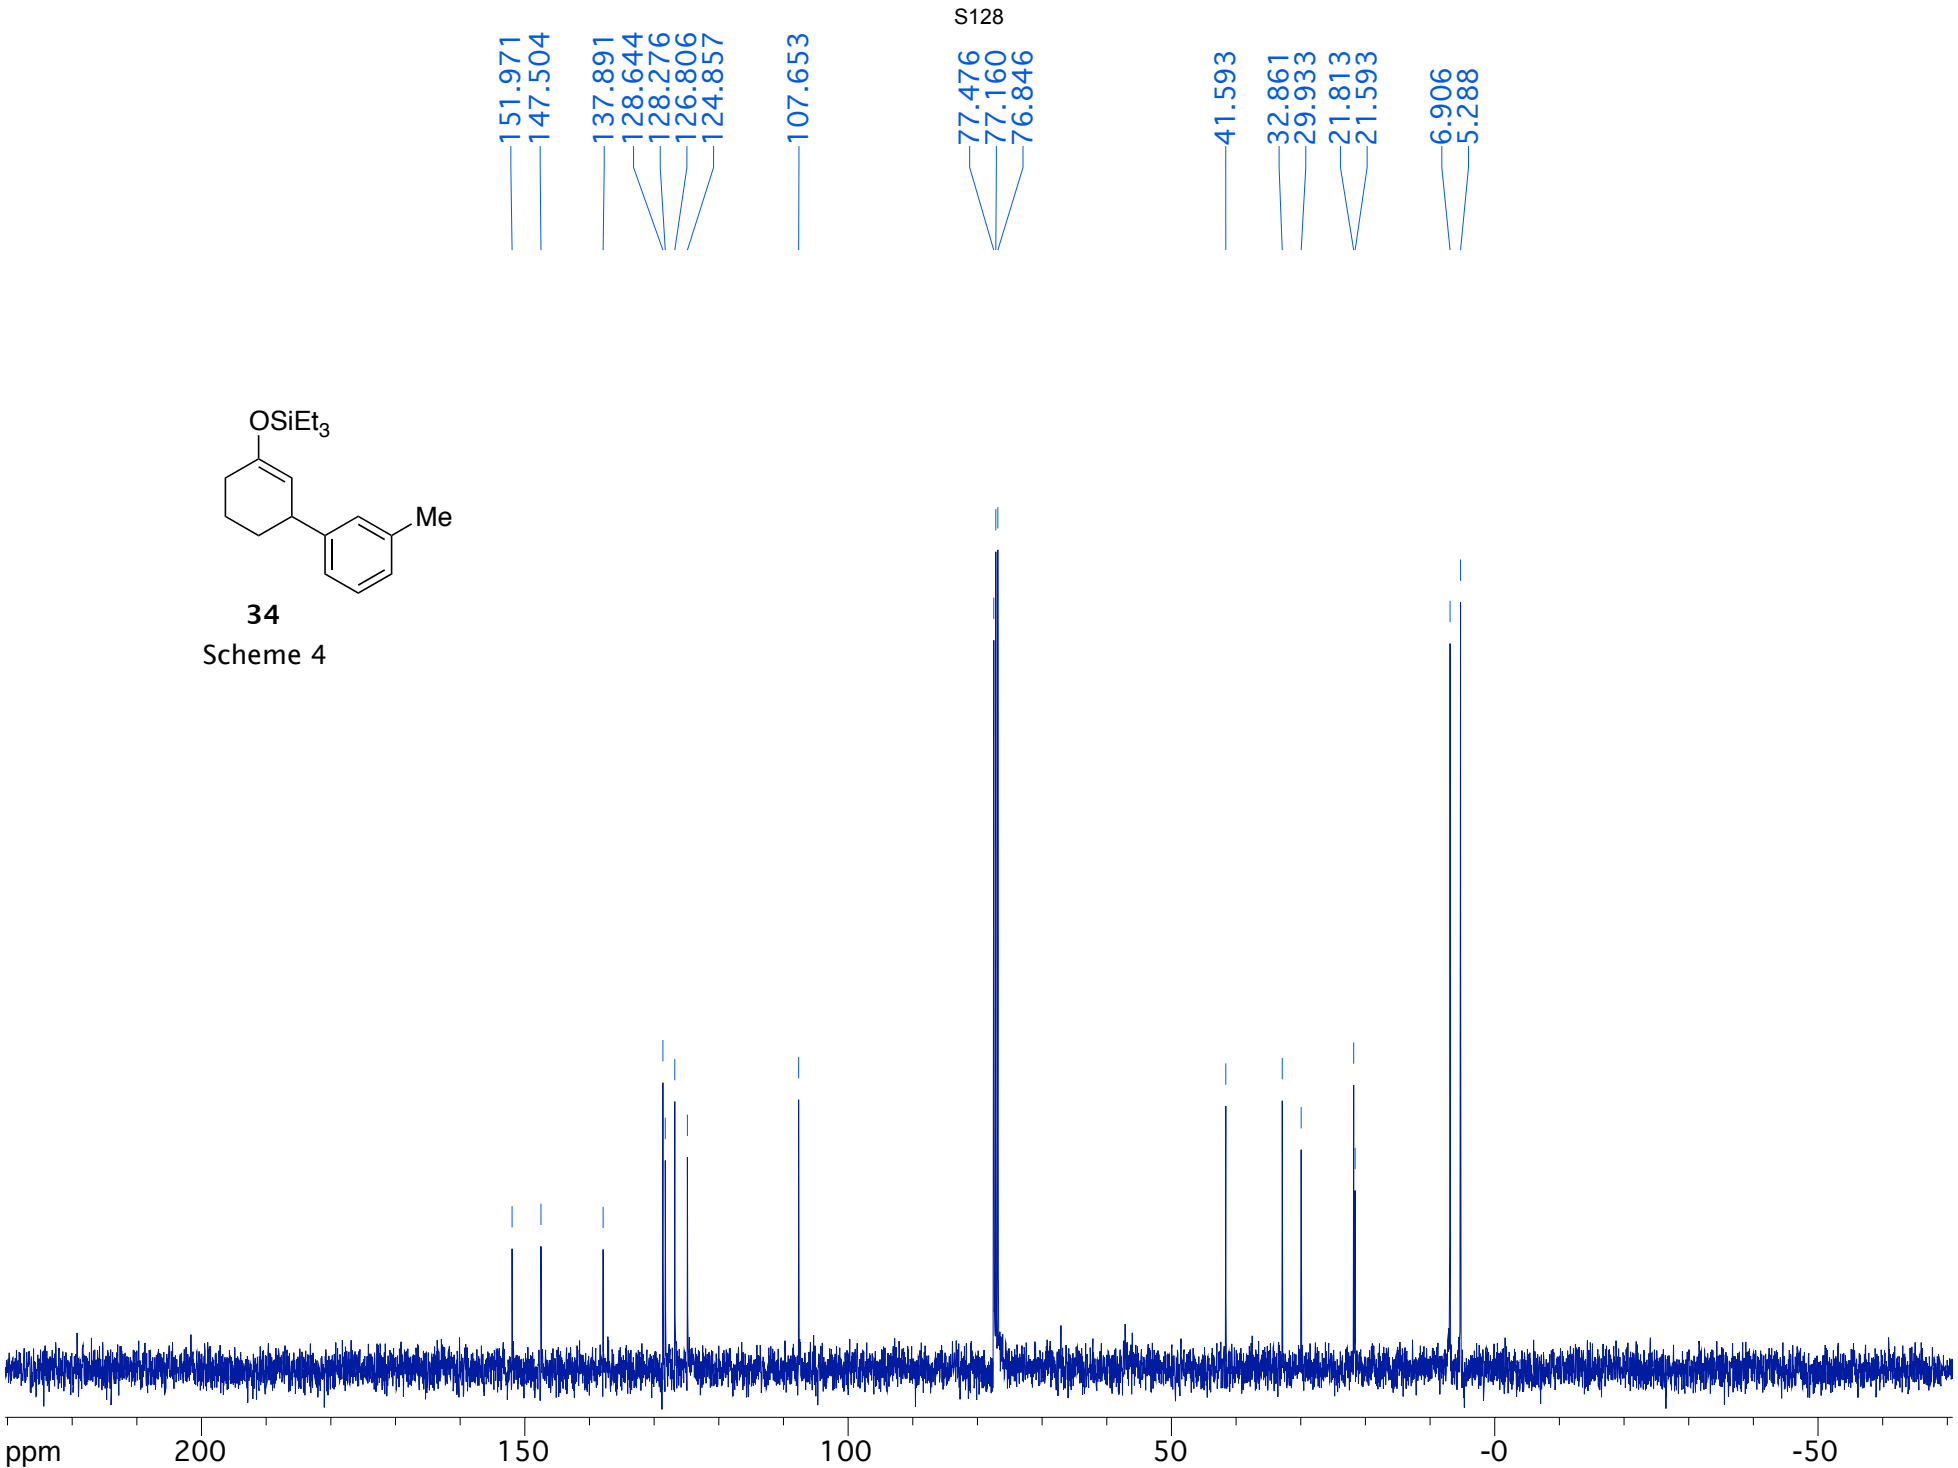

Supplement: NIHMS432185-supplement-1_si_001.pdf [file NIHMS432185-supplement-1_si_001.pdf]
